# Supplementary material for: The combined impacts of wheat spatial position and phenology on cereal aphid abundance
Source: PeerJ. 2020 May 26;8:e9142. doi: 10.7717/peerj.9142 (PMC7258891; doi:10.7717/peerj.9142)
Supplement: Supplemental Information 1 — Table S1: Raw data used in this study. Table S2: Classification of natural vegetation grown the west side of the field. Table S3: Untargeted metabolic raw data generated by the UPLC-qTOF-MS in negative and positive ion modes. Table S4: List of metabolites identified in leaf tissues of 3-month-old wheat plants by UPLC-qTOF-MS analysis. [file peerj-08-9142-s001.xlsx]

## Sheet: Table S1
Table S1. Raw data used in this study.
Sampling date	Block	ID (row number)	Margin	Unit (A-natural, B- Margin wheat resource)	Distance 1-8	Genotype	Developmental stage	Aphid number
2018-03-20	Block 1	11	Natural resource vegetation	A	1	Svevo	10	1
2018-03-20	Block 1	11	Natural resource vegetation	A	2	Svevo	10.1	0
2018-03-20	Block 1	11	Natural resource vegetation	A	3	Svevo	10.1	5
2018-03-20	Block 1	11	Natural resource vegetation	A	4	Svevo	10.1	4
2018-03-20	Block 1	12	Natural resource vegetation	A	1	Svevo	10.1	0
2018-03-20	Block 1	12	Natural resource vegetation	A	2	Svevo	10.1	0
2018-03-20	Block 1	12	Natural resource vegetation	A	3	Svevo	10.1	0
2018-03-20	Block 1	12	Natural resource vegetation	A	4	Svevo	10.1	0
2018-03-20	Block 1	12	Natural resource vegetation	A	5	Svevo	10.1	0
2018-03-20	Block 1	12	Natural resource vegetation	A	6	Svevo	10.1	0
2018-03-20	Block 1	13	Natural resource vegetation	A	1	Zavitan	10	0
2018-03-20	Block 1	13	Natural resource vegetation	A	2	Zavitan	10	0
2018-03-20	Block 1	13	Natural resource vegetation	A	3	Zavitan	10	0
2018-03-20	Block 1	13	Natural resource vegetation	A	4	Zavitan	10	0
2018-03-20	Block 1	13	Natural resource vegetation	A	5	Zavitan	10	0
2018-03-20	Block 1	13	Natural resource vegetation	A	6	Zavitan	10	0
2018-03-20	Block 1	14	Natural resource vegetation	A	1	Zavitan	10	0
2018-03-20	Block 1	14	Natural resource vegetation	A	2	Zavitan	10	0
2018-03-20	Block 1	14	Natural resource vegetation	A	3	Zavitan	10	0
2018-03-20	Block 1	14	Natural resource vegetation	A	4	Zavitan	9	0
2018-03-20	Block 1	14	Natural resource vegetation	A	5	Zavitan	9	0
2018-03-20	Block 1	14	Natural resource vegetation	A	6	Zavitan	9	0
2018-03-20	Block 1	15	Natural resource vegetation	A	1	Zavitan	9	0
2018-03-20	Block 1	15	Natural resource vegetation	A	2	Zavitan	9	0
2018-03-20	Block 1	15	Natural resource vegetation	A	3	Zavitan	9	0
2018-03-20	Block 1	15	Natural resource vegetation	A	4	Zavitan	9	0
2018-03-20	Block 1	15	Natural resource vegetation	A	5	Zavitan	9	0
2018-03-20	Block 1	16	Natural resource vegetation	A	1	Zavitan	10	7
2018-03-20	Block 1	16	Natural resource vegetation	A	2	Zavitan	9	1
2018-03-20	Block 1	16	Natural resource vegetation	A	3	Zavitan	10	0
2018-03-20	Block 1	16	Natural resource vegetation	A	4	Zavitan	10	1
2018-03-20	Block 1	16	Natural resource vegetation	A	5	Zavitan	10	0
2018-03-20	Block 1	16	Natural resource vegetation	A	6	Zavitan	9	2
2018-03-20	Block 1	17	Natural resource vegetation	A	1	Rotem	10.1	1
2018-03-20	Block 1	17	Natural resource vegetation	A	2	Rotem	10.1	0
2018-03-20	Block 1	17	Natural resource vegetation	A	3	Rotem	10.1	0
2018-03-20	Block 1	17	Natural resource vegetation	A	4	Rotem	10.1	0
2018-03-20	Block 1	17	Natural resource vegetation	A	5	Rotem	10.1	1
2018-03-20	Block 1	17	Natural resource vegetation	A	6	Rotem	10.1	1
2018-03-20	Block 1	18	Natural resource vegetation	A	1	Rotem	10.1	14
2018-03-20	Block 1	18	Natural resource vegetation	A	2	Rotem	10.1	2
2018-03-20	Block 1	18	Natural resource vegetation	A	3	Rotem	10.1	2
2018-03-20	Block 1	18	Natural resource vegetation	A	4	Rotem	10.1	2
2018-03-20	Block 1	18	Natural resource vegetation	A	5	Rotem	10.1	4
2018-03-20	Block 1	18	Natural resource vegetation	A	6	Rotem	10	16
2018-03-20	Block 1	18	Natural resource vegetation	A	7	Rotem	10.1	4
2018-03-20	Block 1	11	Margin wheat resource	B	1	Svevo	10.1	0
2018-03-20	Block 1	11	Margin wheat resource	B	2	Svevo	10	2
2018-03-20	Block 1	11	Margin wheat resource	B	3	Svevo	10.1	3
2018-03-20	Block 1	11	Margin wheat resource	B	4	Svevo	10	6
2018-03-20	Block 1	11	Margin wheat resource	B	5	Svevo	10	0
2018-03-20	Block 1	11	Margin wheat resource	B	6	Svevo	10	4
2018-03-20	Block 1	11	Margin wheat resource	B	7	Svevo	10.1	1
2018-03-20	Block 1	12	Margin wheat resource	B	1	Svevo	10	0
2018-03-20	Block 1	12	Margin wheat resource	B	2	Svevo	10.1	0
2018-03-20	Block 1	12	Margin wheat resource	B	3	Svevo	10.1	0
2018-03-20	Block 1	12	Margin wheat resource	B	4	Svevo	10.1	0
2018-03-20	Block 1	12	Margin wheat resource	B	5	Svevo	10.1	0
2018-03-20	Block 1	12	Margin wheat resource	B	6	Svevo	10.1	2
2018-03-20	Block 1	13	Margin wheat resource	B	1	Chinese Spring	9	0
2018-03-20	Block 1	13	Margin wheat resource	B	2	Chinese Spring	9	0
2018-03-20	Block 1	13	Margin wheat resource	B	3	Chinese Spring	9	0
2018-03-20	Block 1	13	Margin wheat resource	B	4	Chinese Spring	9	0
2018-03-20	Block 1	13	Margin wheat resource	B	5	Chinese Spring	10	0
2018-03-20	Block 1	14	Margin wheat resource	B	1	Chinese Spring	9	0
2018-03-20	Block 1	14	Margin wheat resource	B	2	Chinese Spring	9	0
2018-03-20	Block 1	14	Margin wheat resource	B	3	Chinese Spring	9	1
2018-03-20	Block 1	14	Margin wheat resource	B	4	Chinese Spring	9	0
2018-03-20	Block 1	14	Margin wheat resource	B	5	Chinese Spring	9	0
2018-03-20	Block 1	15	Margin wheat resource	B	1	Chinese Spring	9	3
2018-03-20	Block 1	15	Margin wheat resource	B	2	Chinese Spring	9	0
2018-03-20	Block 1	15	Margin wheat resource	B	3	Chinese Spring	9	0
2018-03-20	Block 1	15	Margin wheat resource	B	4	Chinese Spring	9	0
2018-03-20	Block 1	15	Margin wheat resource	B	5	Chinese Spring	9	0
2018-03-20	Block 1	15	Margin wheat resource	B	6	Chinese Spring	9	0
2018-03-20	Block 1	15	Margin wheat resource	B	7	Chinese Spring	9	0
2018-03-20	Block 1	15	Margin wheat resource	B	8	Chinese Spring	9	0
2018-03-20	Block 1	16	Margin wheat resource	B	1	Chinese Spring	9	1
2018-03-20	Block 1	16	Margin wheat resource	B	2	Chinese Spring	9	0
2018-03-20	Block 1	16	Margin wheat resource	B	3	Chinese Spring	9	0
2018-03-20	Block 1	16	Margin wheat resource	B	4	Chinese Spring	9	0
2018-03-20	Block 1	16	Margin wheat resource	B	5	Chinese Spring	9	0
2018-03-20	Block 1	16	Margin wheat resource	B	6	Chinese Spring	9	0
2018-03-20	Block 1	16	Margin wheat resource	B	7	Chinese Spring	9	0
2018-03-20	Block 1	17	Margin wheat resource	B	1	Rotem	10.1	1
2018-03-20	Block 1	17	Margin wheat resource	B	2	Rotem	10.1	2
2018-03-20	Block 1	17	Margin wheat resource	B	3	Rotem	10.1	0
2018-03-20	Block 1	17	Margin wheat resource	B	4	Rotem	10.1	0
2018-03-20	Block 1	17	Margin wheat resource	B	5	Rotem	10.1	1
2018-03-20	Block 1	17	Margin wheat resource	B	6	Rotem	10.1	0
2018-03-20	Block 1	18	Margin wheat resource	B	1	Rotem	10.1	39
2018-03-20	Block 1	18	Margin wheat resource	B	2	Rotem	10.1	7
2018-03-20	Block 2	21	Natural resource vegetation	A	1	Zavitan	10	7
2018-03-20	Block 2	21	Natural resource vegetation	A	2	Zavitan	9	1
2018-03-20	Block 2	21	Natural resource vegetation	A	3	Zavitan	9	0
2018-03-20	Block 2	21	Natural resource vegetation	A	4	Zavitan	10	0
2018-03-20	Block 2	21	Natural resource vegetation	A	5	Zavitan	9	0
2018-03-20	Block 2	22	Natural resource vegetation	A	1	Zavitan	9	1
2018-03-20	Block 2	22	Natural resource vegetation	A	2	Zavitan	10	1
2018-03-20	Block 2	22	Natural resource vegetation	A	3	Zavitan	10	0
2018-03-20	Block 2	22	Natural resource vegetation	A	4	Zavitan	10	0
2018-03-20	Block 2	23	Natural resource vegetation	A	1	Rotem	10.1	6
2018-03-20	Block 2	23	Natural resource vegetation	A	2	Rotem	10.1	0
2018-03-20	Block 2	23	Natural resource vegetation	A	3	Rotem	10.1	0
2018-03-20	Block 2	23	Natural resource vegetation	A	4	Rotem	10.1	0
2018-03-20	Block 2	23	Natural resource vegetation	A	5	Rotem	10.1	0
2018-03-20	Block 2	23	Natural resource vegetation	A	6	Rotem	10.1	0
2018-03-20	Block 2	24	Natural resource vegetation	A	1	Rotem	10.1	0
2018-03-20	Block 2	24	Natural resource vegetation	A	2	Rotem	10.1	0
2018-03-20	Block 2	24	Natural resource vegetation	A	3	Rotem	10.1	0
2018-03-20	Block 2	24	Natural resource vegetation	A	4	Rotem	10.1	0
2018-03-20	Block 2	24	Natural resource vegetation	A	5	Rotem	10.1	0
2018-03-20	Block 2	24	Natural resource vegetation	A	6	Rotem	10.1	2
2018-03-20	Block 2	25	Natural resource vegetation	A	1	Rotem	10.1	0
2018-03-20	Block 2	25	Natural resource vegetation	A	2	Rotem	10.1	0
2018-03-20	Block 2	25	Natural resource vegetation	A	3	Rotem	10.1	0
2018-03-20	Block 2	25	Natural resource vegetation	A	4	Rotem	10.1	0
2018-03-20	Block 2	25	Natural resource vegetation	A	5	Rotem	10.1	0
2018-03-20	Block 2	25	Natural resource vegetation	A	6	Rotem	10.1	0
2018-03-20	Block 2	26	Natural resource vegetation	A	1	Rotem	10.1	0
2018-03-20	Block 2	26	Natural resource vegetation	A	2	Rotem	10.1	0
2018-03-20	Block 2	26	Natural resource vegetation	A	3	Rotem	10.1	0
2018-03-20	Block 2	26	Natural resource vegetation	A	4	Rotem	10.1	0
2018-03-20	Block 2	26	Natural resource vegetation	A	5	Rotem	10.1	0
2018-03-20	Block 2	26	Natural resource vegetation	A	6	Rotem	10.1	0
2018-03-20	Block 2	27	Natural resource vegetation	A	1	Chinese Spring	9	0
2018-03-20	Block 2	27	Natural resource vegetation	A	2	Chinese Spring	9	0
2018-03-20	Block 2	27	Natural resource vegetation	A	3	Chinese Spring	9	0
2018-03-20	Block 2	27	Natural resource vegetation	A	4	Chinese Spring	9	0
2018-03-20	Block 2	27	Natural resource vegetation	A	5	Chinese Spring	9	0
2018-03-20	Block 2	28	Natural resource vegetation	A	1	Chinese Spring	9	3
2018-03-20	Block 2	28	Natural resource vegetation	A	2	Chinese Spring	9	0
2018-03-20	Block 2	28	Natural resource vegetation	A	3	Chinese Spring	9	0
2018-03-20	Block 2	28	Natural resource vegetation	A	4	Chinese Spring	9	0
2018-03-20	Block 2	28	Natural resource vegetation	A	5	Chinese Spring	9	2
2018-03-20	Block 2	28	Natural resource vegetation	A	6	Chinese Spring	9	0
2018-03-20	Block 2	21	Natural resource vegetation	B	1	Zavitan	10	1
2018-03-20	Block 2	21	Natural resource vegetation	B	2	Zavitan	9	0
2018-03-20	Block 2	21	Natural resource vegetation	B	3	Zavitan	9	3
2018-03-20	Block 2	21	Natural resource vegetation	B	4	Zavitan	10	3
2018-03-20	Block 2	21	Natural resource vegetation	B	5	Zavitan	9	0
2018-03-20	Block 2	22	Natural resource vegetation	B	1	Zavitan	10	0
2018-03-20	Block 2	22	Natural resource vegetation	B	2	Zavitan	10	1
2018-03-20	Block 2	22	Natural resource vegetation	B	3	Zavitan	9	2
2018-03-20	Block 2	22	Natural resource vegetation	B	4	Zavitan	9	0
2018-03-20	Block 2	22	Natural resource vegetation	B	5	Zavitan	9	0
2018-03-20	Block 2	22	Natural resource vegetation	B	6	Zavitan	10	0
2018-03-20	Block 2	23	Natural resource vegetation	B	1	Svevo	10	0
2018-03-20	Block 2	23	Natural resource vegetation	B	2	Svevo	10	1
2018-03-20	Block 2	23	Natural resource vegetation	B	3	Svevo	10	0
2018-03-20	Block 2	23	Natural resource vegetation	B	4	Svevo	10	2
2018-03-20	Block 2	23	Natural resource vegetation	B	5	Svevo	10	0
2018-03-20	Block 2	23	Natural resource vegetation	B	6	Svevo	10	0
2018-03-20	Block 2	24	Natural resource vegetation	B	1	Svevo	10	0
2018-03-20	Block 2	24	Natural resource vegetation	B	2	Svevo	10	0
2018-03-20	Block 2	24	Natural resource vegetation	B	3	Svevo	10	0
2018-03-20	Block 2	24	Natural resource vegetation	B	4	Svevo	10	2
2018-03-20	Block 2	24	Natural resource vegetation	B	5	Svevo	10	0
2018-03-20	Block 2	24	Natural resource vegetation	B	6	Svevo	10	0
2018-03-20	Block 2	25	Natural resource vegetation	B	1	Svevo	10	1
2018-03-20	Block 2	25	Natural resource vegetation	B	2	Svevo	10	0
2018-03-20	Block 2	25	Natural resource vegetation	B	3	Svevo	10.1	0
2018-03-20	Block 2	25	Natural resource vegetation	B	4	Svevo	10.1	0
2018-03-20	Block 2	25	Natural resource vegetation	B	5	Svevo	10.1	13
2018-03-20	Block 2	25	Natural resource vegetation	B	6	Svevo	10.1	0
2018-03-20	Block 2	26	Natural resource vegetation	B	1	Svevo	10	0
2018-03-20	Block 2	26	Natural resource vegetation	B	2	Svevo	8	10
2018-03-20	Block 2	26	Natural resource vegetation	B	3	Svevo	10.1	0
2018-03-20	Block 2	26	Natural resource vegetation	B	4	Svevo	10.1	4
2018-03-20	Block 2	26	Natural resource vegetation	B	5	Svevo	10.1	0
2018-03-20	Block 2	27	Natural resource vegetation	B	1	Chinese Spring	9	1
2018-03-20	Block 2	27	Natural resource vegetation	B	2	Chinese Spring	9	0
2018-03-20	Block 2	27	Natural resource vegetation	B	3	Chinese Spring	9	0
2018-03-20	Block 2	27	Natural resource vegetation	B	4	Chinese Spring	9	0
2018-03-20	Block 2	27	Natural resource vegetation	B	5	Chinese Spring	9	0
2018-03-20	Block 2	27	Natural resource vegetation	B	6	Chinese Spring	9	0
2018-03-20	Block 2	28	Natural resource vegetation	B	1	Chinese Spring	9	2
2018-03-20	Block 2	28	Natural resource vegetation	B	2	Chinese Spring	9	0
2018-03-20	Block 2	28	Natural resource vegetation	B	3	Chinese Spring	9	0
2018-03-20	Block 2	28	Natural resource vegetation	B	4	Chinese Spring	9	1
2018-03-20	Block 3	31	Natural resource vegetation	A	1	Rotem	10.1	4
2018-03-20	Block 3	31	Natural resource vegetation	A	2	Rotem	10.1	19
2018-03-20	Block 3	31	Natural resource vegetation	A	3	Rotem	10.1	1
2018-03-20	Block 3	31	Natural resource vegetation	A	4	Rotem	10.1	0
2018-03-20	Block 3	31	Natural resource vegetation	A	5	Rotem	10.1	0
2018-03-20	Block 3	32	Natural resource vegetation	A	1	Rotem	10.1	1
2018-03-20	Block 3	32	Natural resource vegetation	A	2	Rotem	10.1	2
2018-03-20	Block 3	32	Natural resource vegetation	A	3	Rotem	10.1	0
2018-03-20	Block 3	32	Natural resource vegetation	A	4	Rotem	10.1	0
2018-03-20	Block 3	32	Natural resource vegetation	A	5	Rotem	10.1	0
2018-03-20	Block 3	32	Natural resource vegetation	A	6	Rotem	10.1	0
2018-03-20	Block 3	33	Natural resource vegetation	A	1	Chinese Spring	8	0
2018-03-20	Block 3	33	Natural resource vegetation	A	2	Chinese Spring	8	0
2018-03-20	Block 3	33	Natural resource vegetation	A	3	Chinese Spring	9	0
2018-03-20	Block 3	33	Natural resource vegetation	A	4	Chinese Spring	9	0
2018-03-20	Block 3	33	Natural resource vegetation	A	5	Chinese Spring	8	0
2018-03-20	Block 3	33	Natural resource vegetation	A	6	Chinese Spring	8	0
2018-03-20	Block 3	34	Natural resource vegetation	A	1	Chinese Spring	8	0
2018-03-20	Block 3	34	Natural resource vegetation	A	2	Chinese Spring	9	0
2018-03-20	Block 3	34	Natural resource vegetation	A	3	Chinese Spring	8	0
2018-03-20	Block 3	34	Natural resource vegetation	A	4	Chinese Spring	8	0
2018-03-20	Block 3	34	Natural resource vegetation	A	5	Chinese Spring	8	0
2018-03-20	Block 3	34	Natural resource vegetation	A	6	Chinese Spring	8	0
2018-03-20	Block 3	35	Natural resource vegetation	A	1	Chinese Spring	8	0
2018-03-20	Block 3	35	Natural resource vegetation	A	2	Chinese Spring	8	0
2018-03-20	Block 3	35	Natural resource vegetation	A	3	Chinese Spring	8	0
2018-03-20	Block 3	35	Natural resource vegetation	A	4	Chinese Spring	9	0
2018-03-20	Block 3	36	Natural resource vegetation	A	1	Chinese Spring	8	0
2018-03-20	Block 3	36	Natural resource vegetation	A	2	Chinese Spring	8	0
2018-03-20	Block 3	36	Natural resource vegetation	A	3	Chinese Spring	8	0
2018-03-20	Block 3	36	Natural resource vegetation	A	4	Chinese Spring	8	0
2018-03-20	Block 3	36	Natural resource vegetation	A	5	Chinese Spring	8	0
2018-03-20	Block 3	37	Natural resource vegetation	A	1	Svevo	10	0
2018-03-20	Block 3	37	Natural resource vegetation	A	2	Svevo	10	1
2018-03-20	Block 3	37	Natural resource vegetation	A	3	Svevo	10	1
2018-03-20	Block 3	37	Natural resource vegetation	A	4	Svevo	10	3
2018-03-20	Block 3	37	Natural resource vegetation	A	5	Svevo	10	0
2018-03-20	Block 3	37	Natural resource vegetation	A	6	Svevo	10	0
2018-03-20	Block 3	37	Natural resource vegetation	A	7	Svevo	10	1
2018-03-20	Block 3	37	Natural resource vegetation	A	8	Svevo	10	0
2018-03-20	Block 3	38	Natural resource vegetation	A	1	Svevo	10	1
2018-03-20	Block 3	38	Natural resource vegetation	A	2	Svevo	10	0
2018-03-20	Block 3	38	Natural resource vegetation	A	3	Svevo	10	0
2018-03-20	Block 3	38	Natural resource vegetation	A	4	Svevo	10	0
2018-03-20	Block 3	38	Natural resource vegetation	A	5	Svevo	10	0
2018-03-20	Block 3	38	Natural resource vegetation	A	6	Svevo	10	0
2018-03-20	Block 3	31	Margin wheat resource	B	1	Rotem	10.1	15
2018-03-20	Block 3	31	Margin wheat resource	B	2	Rotem	10.1	1
2018-03-20	Block 3	31	Margin wheat resource	B	3	Rotem	10.1	4
2018-03-20	Block 3	31	Margin wheat resource	B	4	Rotem	10.1	0
2018-03-20	Block 3	32	Margin wheat resource	B	1	Rotem	10.1	3
2018-03-20	Block 3	32	Margin wheat resource	B	2	Rotem	10.1	1
2018-03-20	Block 3	32	Margin wheat resource	B	3	Rotem	10.1	0
2018-03-20	Block 3	32	Margin wheat resource	B	4	Rotem	10.1	0
2018-03-20	Block 3	32	Margin wheat resource	B	5	Rotem	10.1	0
2018-03-20	Block 3	33	Margin wheat resource	B	1	Zavitan	10	0
2018-03-20	Block 3	33	Margin wheat resource	B	2	Zavitan	10	3
2018-03-20	Block 3	33	Margin wheat resource	B	3	Zavitan	10	0
2018-03-20	Block 3	33	Margin wheat resource	B	4	Zavitan	10	0
2018-03-20	Block 3	33	Margin wheat resource	B	5	Zavitan	10	0
2018-03-20	Block 3	33	Margin wheat resource	B	6	Zavitan	10	0
2018-03-20	Block 3	34	Margin wheat resource	B	1	Zavitan	10	1
2018-03-20	Block 3	34	Margin wheat resource	B	2	Zavitan	10	0
2018-03-20	Block 3	34	Margin wheat resource	B	3	Zavitan	10	1
2018-03-20	Block 3	34	Margin wheat resource	B	4	Zavitan	10	0
2018-03-20	Block 3	35	Margin wheat resource	B	1	Zavitan	10	2
2018-03-20	Block 3	35	Margin wheat resource	B	2	Zavitan	9	1
2018-03-20	Block 3	35	Margin wheat resource	B	3	Zavitan	10	1
2018-03-20	Block 3	35	Margin wheat resource	B	4	Zavitan	10	0
2018-03-20	Block 3	36	Margin wheat resource	B	1	Zavitan	10	1
2018-03-20	Block 3	36	Margin wheat resource	B	2	Zavitan	9	0
2018-03-20	Block 3	36	Margin wheat resource	B	3	Zavitan	10	0
2018-03-20	Block 3	36	Margin wheat resource	B	4	Zavitan	9	0
2018-03-20	Block 3	37	Margin wheat resource	B	1	Svevo	10	6
2018-03-20	Block 3	37	Margin wheat resource	B	2	Svevo	10	4
2018-03-20	Block 3	37	Margin wheat resource	B	3	Svevo	10	0
2018-03-20	Block 3	37	Margin wheat resource	B	4	Svevo	10	0
2018-03-20	Block 3	37	Margin wheat resource	B	5	Svevo	10	0
2018-03-20	Block 3	37	Margin wheat resource	B	6	Svevo	10	0
2018-03-20	Block 3	37	Margin wheat resource	B	7	Svevo	10	0
2018-03-20	Block 3	38	Margin wheat resource	B	1	Svevo	9	6
2018-03-20	Block 3	38	Margin wheat resource	B	2	Svevo	10	1
2018-03-20	Block 3	38	Margin wheat resource	B	3	Svevo	10	0
2018-03-20	Block 3	38	Margin wheat resource	B	4	Svevo	10	6
2018-03-20	Block 3	38	Margin wheat resource	B	5	Svevo	10	0
2018-03-20	Block 3	38	Margin wheat resource	B	6	Svevo	10	1
2018-03-20	Block 3	38	Margin wheat resource	B	7	Svevo	10	3
2018-04-01	Block 1	11	Natural resource vegetation	A	1	Svevo	10.1	0
2018-04-01	Block 1	11	Natural resource vegetation	A	2	Svevo	10.1	0
2018-04-01	Block 1	11	Natural resource vegetation	A	3	Svevo	10.1	0
2018-04-01	Block 1	11	Natural resource vegetation	A	4	Svevo	10.1	4
2018-04-01	Block 1	12	Natural resource vegetation	A	1	Svevo	10.1	3
2018-04-01	Block 1	12	Natural resource vegetation	A	2	Svevo	10.1	0
2018-04-01	Block 1	12	Natural resource vegetation	A	3	Svevo	10.1	0
2018-04-01	Block 1	12	Natural resource vegetation	A	4	Svevo	10.1	0
2018-04-01	Block 1	12	Natural resource vegetation	A	5	Svevo	10.1	0
2018-04-01	Block 1	12	Natural resource vegetation	A	6	Svevo	10.1	0
2018-04-01	Block 1	13	Natural resource vegetation	A	1	Zavitan	10.1	0
2018-04-01	Block 1	13	Natural resource vegetation	A	2	Zavitan	10.1	0
2018-04-01	Block 1	13	Natural resource vegetation	A	3	Zavitan	10.1	0
2018-04-01	Block 1	13	Natural resource vegetation	A	4	Zavitan	10.1	0
2018-04-01	Block 1	13	Natural resource vegetation	A	5	Zavitan	10.1	0
2018-04-01	Block 1	13	Natural resource vegetation	A	6	Zavitan	10.1	1
2018-04-01	Block 1	14	Natural resource vegetation	A	1	Zavitan	10.1	0
2018-04-01	Block 1	14	Natural resource vegetation	A	2	Zavitan	10.1	0
2018-04-01	Block 1	14	Natural resource vegetation	A	3	Zavitan	10.1	0
2018-04-01	Block 1	14	Natural resource vegetation	A	4	Zavitan	10	0
2018-04-01	Block 1	14	Natural resource vegetation	A	5	Zavitan	10	0
2018-04-01	Block 1	14	Natural resource vegetation	A	6	Zavitan	10	0
2018-04-01	Block 1	15	Natural resource vegetation	A	1	Zavitan	10	0
2018-04-01	Block 1	15	Natural resource vegetation	A	2	Zavitan	10	0
2018-04-01	Block 1	15	Natural resource vegetation	A	3	Zavitan	10	0
2018-04-01	Block 1	15	Natural resource vegetation	A	4	Zavitan	10	0
2018-04-01	Block 1	15	Natural resource vegetation	A	5	Zavitan	10	0
2018-04-01	Block 1	16	Natural resource vegetation	A	1	Zavitan	10.1	0
2018-04-01	Block 1	16	Natural resource vegetation	A	2	Zavitan	10	0
2018-04-01	Block 1	16	Natural resource vegetation	A	3	Zavitan	10.1	0
2018-04-01	Block 1	16	Natural resource vegetation	A	4	Zavitan	10.1	0
2018-04-01	Block 1	16	Natural resource vegetation	A	5	Zavitan	10.1	0
2018-04-01	Block 1	16	Natural resource vegetation	A	6	Zavitan	10	0
2018-04-01	Block 1	17	Natural resource vegetation	A	1	Rotem	10.5	0
2018-04-01	Block 1	17	Natural resource vegetation	A	2	Rotem	10.5	0
2018-04-01	Block 1	17	Natural resource vegetation	A	3	Rotem	10.5	0
2018-04-01	Block 1	17	Natural resource vegetation	A	4	Rotem	10.5	0
2018-04-01	Block 1	17	Natural resource vegetation	A	5	Rotem	10.5	0
2018-04-01	Block 1	17	Natural resource vegetation	A	6	Rotem	10.5	0
2018-04-01	Block 1	18	Natural resource vegetation	A	1	Rotem	10.5	23
2018-04-01	Block 1	18	Natural resource vegetation	A	2	Rotem	10.5	29
2018-04-01	Block 1	18	Natural resource vegetation	A	3	Rotem	10.5	5
2018-04-01	Block 1	18	Natural resource vegetation	A	4	Rotem	10.5	27
2018-04-01	Block 1	18	Natural resource vegetation	A	5	Rotem	10.5	5
2018-04-01	Block 1	18	Natural resource vegetation	A	6	Rotem	10.1	4
2018-04-01	Block 1	18	Natural resource vegetation	A	7	Rotem	10.5	11
2018-04-01	Block 1	11	Margin wheat resource	B	1	Svevo	10.1	10
2018-04-01	Block 1	11	Margin wheat resource	B	2	Svevo	10.1	13
2018-04-01	Block 1	11	Margin wheat resource	B	3	Svevo	10.1	2
2018-04-01	Block 1	11	Margin wheat resource	B	4	Svevo	10.1	3
2018-04-01	Block 1	11	Margin wheat resource	B	5	Svevo	10.1	0
2018-04-01	Block 1	11	Margin wheat resource	B	6	Svevo	10.1	1
2018-04-01	Block 1	11	Margin wheat resource	B	7	Svevo	10.1	0
2018-04-01	Block 1	12	Margin wheat resource	B	1	Svevo	10.1	8
2018-04-01	Block 1	12	Margin wheat resource	B	2	Svevo	10.1	0
2018-04-01	Block 1	12	Margin wheat resource	B	3	Svevo	10.1	2
2018-04-01	Block 1	12	Margin wheat resource	B	4	Svevo	10.1	0
2018-04-01	Block 1	12	Margin wheat resource	B	5	Svevo	10.1	1
2018-04-01	Block 1	12	Margin wheat resource	B	6	Svevo	10.1	1
2018-04-01	Block 1	13	Margin wheat resource	B	1	Chinese Spring	10	19
2018-04-01	Block 1	13	Margin wheat resource	B	2	Chinese Spring	10	2
2018-04-01	Block 1	13	Margin wheat resource	B	3	Chinese Spring	10	1
2018-04-01	Block 1	13	Margin wheat resource	B	4	Chinese Spring	10	6
2018-04-01	Block 1	13	Margin wheat resource	B	5	Chinese Spring	10.1	0
2018-04-01	Block 1	14	Margin wheat resource	B	1	Chinese Spring	10	2
2018-04-01	Block 1	14	Margin wheat resource	B	2	Chinese Spring	10	2
2018-04-01	Block 1	14	Margin wheat resource	B	3	Chinese Spring	10	0
2018-04-01	Block 1	14	Margin wheat resource	B	4	Chinese Spring	10	0
2018-04-01	Block 1	14	Margin wheat resource	B	5	Chinese Spring	10	0
2018-04-01	Block 1	15	Margin wheat resource	B	1	Chinese Spring	10	0
2018-04-01	Block 1	15	Margin wheat resource	B	2	Chinese Spring	10	2
2018-04-01	Block 1	15	Margin wheat resource	B	3	Chinese Spring	10	3
2018-04-01	Block 1	15	Margin wheat resource	B	4	Chinese Spring	10	1
2018-04-01	Block 1	15	Margin wheat resource	B	5	Chinese Spring	10	2
2018-04-01	Block 1	15	Margin wheat resource	B	6	Chinese Spring	10	0
2018-04-01	Block 1	15	Margin wheat resource	B	7	Chinese Spring	10	0
2018-04-01	Block 1	15	Margin wheat resource	B	8	Chinese Spring	10	1
2018-04-01	Block 1	16	Margin wheat resource	B	1	Chinese Spring	10	2
2018-04-01	Block 1	16	Margin wheat resource	B	2	Chinese Spring	10	0
2018-04-01	Block 1	16	Margin wheat resource	B	3	Chinese Spring	10	22
2018-04-01	Block 1	16	Margin wheat resource	B	4	Chinese Spring	10	0
2018-04-01	Block 1	16	Margin wheat resource	B	5	Chinese Spring	10	1
2018-04-01	Block 1	16	Margin wheat resource	B	6	Chinese Spring	10	2
2018-04-01	Block 1	16	Margin wheat resource	B	7	Chinese Spring	10	0
2018-04-01	Block 1	17	Margin wheat resource	B	1	Rotem	10.5	21
2018-04-01	Block 1	17	Margin wheat resource	B	2	Rotem	10.5	2
2018-04-01	Block 1	17	Margin wheat resource	B	3	Rotem	10.5	3
2018-04-01	Block 1	17	Margin wheat resource	B	4	Rotem	10.5	48
2018-04-01	Block 1	17	Margin wheat resource	B	5	Rotem	10.5	6
2018-04-01	Block 1	17	Margin wheat resource	B	6	Rotem	10.5	3
2018-04-01	Block 1	18	Margin wheat resource	B	1	Rotem	10.5	36
2018-04-01	Block 1	18	Margin wheat resource	B	2	Rotem	10.5	18
2018-04-01	Block 2	21	Natural resource vegetation	A	1	Zavitan	10.1	1
2018-04-01	Block 2	21	Natural resource vegetation	A	2	Zavitan	10	1
2018-04-01	Block 2	21	Natural resource vegetation	A	3	Zavitan	10	1
2018-04-01	Block 2	21	Natural resource vegetation	A	4	Zavitan	10.1	1
2018-04-01	Block 2	21	Natural resource vegetation	A	5	Zavitan	10	0
2018-04-01	Block 2	22	Natural resource vegetation	A	1	Zavitan	10	0
2018-04-01	Block 2	22	Natural resource vegetation	A	2	Zavitan	10.1	0
2018-04-01	Block 2	22	Natural resource vegetation	A	3	Zavitan	10.1	0
2018-04-01	Block 2	22	Natural resource vegetation	A	4	Zavitan	10.1	0
2018-04-01	Block 2	23	Natural resource vegetation	A	1	Rotem	10.5	11
2018-04-01	Block 2	23	Natural resource vegetation	A	2	Rotem	10.5	15
2018-04-01	Block 2	23	Natural resource vegetation	A	3	Rotem	10.5	5
2018-04-01	Block 2	23	Natural resource vegetation	A	4	Rotem	10.5	13
2018-04-01	Block 2	23	Natural resource vegetation	A	5	Rotem	10.5	6
2018-04-01	Block 2	23	Natural resource vegetation	A	6	Rotem	10.5	4
2018-04-01	Block 2	24	Natural resource vegetation	A	1	Rotem	10.5	1
2018-04-01	Block 2	24	Natural resource vegetation	A	2	Rotem	10.5	5
2018-04-01	Block 2	24	Natural resource vegetation	A	3	Rotem	10.5	17
2018-04-01	Block 2	24	Natural resource vegetation	A	4	Rotem	10.5	16
2018-04-01	Block 2	24	Natural resource vegetation	A	5	Rotem	10.5	6
2018-04-01	Block 2	24	Natural resource vegetation	A	6	Rotem	10.5	2
2018-04-01	Block 2	25	Natural resource vegetation	A	1	Rotem	10.5	27
2018-04-01	Block 2	25	Natural resource vegetation	A	2	Rotem	10.5	10
2018-04-01	Block 2	25	Natural resource vegetation	A	3	Rotem	10.5	3
2018-04-01	Block 2	25	Natural resource vegetation	A	4	Rotem	10.5	4
2018-04-01	Block 2	25	Natural resource vegetation	A	5	Rotem	10.5	5
2018-04-01	Block 2	25	Natural resource vegetation	A	6	Rotem	10.5	5
2018-04-01	Block 2	26	Natural resource vegetation	A	1	Rotem	10.5	13
2018-04-01	Block 2	26	Natural resource vegetation	A	2	Rotem	10.5	7
2018-04-01	Block 2	26	Natural resource vegetation	A	3	Rotem	10.5	8
2018-04-01	Block 2	26	Natural resource vegetation	A	4	Rotem	10.5	8
2018-04-01	Block 2	26	Natural resource vegetation	A	5	Rotem	10.5	8
2018-04-01	Block 2	26	Natural resource vegetation	A	6	Rotem	10.5	3
2018-04-01	Block 2	27	Natural resource vegetation	A	1	Chinese Spring	10	1
2018-04-01	Block 2	27	Natural resource vegetation	A	2	Chinese Spring	10	2
2018-04-01	Block 2	27	Natural resource vegetation	A	3	Chinese Spring	10	14
2018-04-01	Block 2	27	Natural resource vegetation	A	4	Chinese Spring	10	2
2018-04-01	Block 2	27	Natural resource vegetation	A	5	Chinese Spring	10	6
2018-04-01	Block 2	28	Natural resource vegetation	A	1	Chinese Spring	10	6
2018-04-01	Block 2	28	Natural resource vegetation	A	2	Chinese Spring	10	4
2018-04-01	Block 2	28	Natural resource vegetation	A	3	Chinese Spring	10	0
2018-04-01	Block 2	28	Natural resource vegetation	A	4	Chinese Spring	10	0
2018-04-01	Block 2	28	Natural resource vegetation	A	5	Chinese Spring	10	0
2018-04-01	Block 2	28	Natural resource vegetation	A	6	Chinese Spring	10	0
2018-04-01	Block 2	21	Margin wheat resource	B	1	Zavitan	10.1	3
2018-04-01	Block 2	21	Margin wheat resource	B	2	Zavitan	10	12
2018-04-01	Block 2	21	Margin wheat resource	B	3	Zavitan	10	0
2018-04-01	Block 2	21	Margin wheat resource	B	4	Zavitan	10.1	2
2018-04-01	Block 2	21	Margin wheat resource	B	5	Zavitan	10	2
2018-04-01	Block 2	22	Margin wheat resource	B	1	Zavitan	10.1	0
2018-04-01	Block 2	22	Margin wheat resource	B	2	Zavitan	10.1	0
2018-04-01	Block 2	22	Margin wheat resource	B	3	Zavitan	10	1
2018-04-01	Block 2	22	Margin wheat resource	B	4	Zavitan	10	1
2018-04-01	Block 2	22	Margin wheat resource	B	5	Zavitan	10	0
2018-04-01	Block 2	22	Margin wheat resource	B	6	Zavitan	10.1	1
2018-04-01	Block 2	23	Margin wheat resource	B	1	Svevo	10.1	1
2018-04-01	Block 2	23	Margin wheat resource	B	2	Svevo	10.1	1
2018-04-01	Block 2	23	Margin wheat resource	B	3	Svevo	10.1	4
2018-04-01	Block 2	23	Margin wheat resource	B	4	Svevo	10.1	0
2018-04-01	Block 2	23	Margin wheat resource	B	5	Svevo	10.1	2
2018-04-01	Block 2	23	Margin wheat resource	B	6	Svevo	10.1	12
2018-04-01	Block 2	24	Margin wheat resource	B	1	Svevo	10.1	14
2018-04-01	Block 2	24	Margin wheat resource	B	2	Svevo	10.1	6
2018-04-01	Block 2	24	Margin wheat resource	B	3	Svevo	10.1	2
2018-04-01	Block 2	24	Margin wheat resource	B	4	Svevo	10.1	1
2018-04-01	Block 2	24	Margin wheat resource	B	5	Svevo	10.1	2
2018-04-01	Block 2	24	Margin wheat resource	B	6	Svevo	10.1	1
2018-04-01	Block 2	25	Margin wheat resource	B	1	Svevo	10.1	5
2018-04-01	Block 2	25	Margin wheat resource	B	2	Svevo	10.1	3
2018-04-01	Block 2	25	Margin wheat resource	B	3	Svevo	10.1	4
2018-04-01	Block 2	25	Margin wheat resource	B	4	Svevo	10.1	0
2018-04-01	Block 2	25	Margin wheat resource	B	5	Svevo	10.1	7
2018-04-01	Block 2	25	Margin wheat resource	B	6	Svevo	10.1	0
2018-04-01	Block 2	26	Margin wheat resource	B	1	Svevo	10.1	0
2018-04-01	Block 2	26	Margin wheat resource	B	2	Svevo	9	15
2018-04-01	Block 2	26	Margin wheat resource	B	3	Svevo	10.1	22
2018-04-01	Block 2	26	Margin wheat resource	B	4	Svevo	10.1	8
2018-04-01	Block 2	26	Margin wheat resource	B	5	Svevo	10.1	2
2018-04-01	Block 2	27	Margin wheat resource	B	1	Chinese Spring	10	0
2018-04-01	Block 2	27	Margin wheat resource	B	2	Chinese Spring	10	2
2018-04-01	Block 2	27	Margin wheat resource	B	3	Chinese Spring	10	3
2018-04-01	Block 2	27	Margin wheat resource	B	4	Chinese Spring	10	1
2018-04-01	Block 2	27	Margin wheat resource	B	5	Chinese Spring	10	0
2018-04-01	Block 2	27	Margin wheat resource	B	6	Chinese Spring	10	1
2018-04-01	Block 2	28	Margin wheat resource	B	1	Chinese Spring	10	2
2018-04-01	Block 2	28	Margin wheat resource	B	2	Chinese Spring	10	5
2018-04-01	Block 2	28	Margin wheat resource	B	3	Chinese Spring	10	3
2018-04-01	Block 2	28	Margin wheat resource	B	4	Chinese Spring	10	0
2018-04-01	Block 3	31	Natural resource vegetation	A	1	Rotem	10.5	9
2018-04-01	Block 3	31	Natural resource vegetation	A	2	Rotem	10.5	16
2018-04-01	Block 3	31	Natural resource vegetation	A	3	Rotem	10.5	2
2018-04-01	Block 3	31	Natural resource vegetation	A	4	Rotem	10.5	4
2018-04-01	Block 3	31	Natural resource vegetation	A	5	Rotem	10.5	15
2018-04-01	Block 3	32	Natural resource vegetation	A	1	Rotem	10.5	10
2018-04-01	Block 3	32	Natural resource vegetation	A	2	Rotem	10.5	1
2018-04-01	Block 3	32	Natural resource vegetation	A	3	Rotem	10.5	0
2018-04-01	Block 3	32	Natural resource vegetation	A	4	Rotem	10.5	0
2018-04-01	Block 3	32	Natural resource vegetation	A	5	Rotem	10.5	4
2018-04-01	Block 3	32	Natural resource vegetation	A	6	Rotem	10.5	20
2018-04-01	Block 3	33	Natural resource vegetation	A	1	Chinese Spring	10	0
2018-04-01	Block 3	33	Natural resource vegetation	A	2	Chinese Spring	10	0
2018-04-01	Block 3	33	Natural resource vegetation	A	3	Chinese Spring	10	0
2018-04-01	Block 3	33	Natural resource vegetation	A	4	Chinese Spring	10	0
2018-04-01	Block 3	33	Natural resource vegetation	A	5	Chinese Spring	10	0
2018-04-01	Block 3	33	Natural resource vegetation	A	6	Chinese Spring	10	1
2018-04-01	Block 3	34	Natural resource vegetation	A	1	Chinese Spring	10	0
2018-04-01	Block 3	34	Natural resource vegetation	A	2	Chinese Spring	10	0
2018-04-01	Block 3	34	Natural resource vegetation	A	3	Chinese Spring	10	0
2018-04-01	Block 3	34	Natural resource vegetation	A	4	Chinese Spring	10	0
2018-04-01	Block 3	34	Natural resource vegetation	A	5	Chinese Spring	10	0
2018-04-01	Block 3	34	Natural resource vegetation	A	6	Chinese Spring	10	0
2018-04-01	Block 3	35	Natural resource vegetation	A	1	Chinese Spring	10	0
2018-04-01	Block 3	35	Natural resource vegetation	A	2	Chinese Spring	10	0
2018-04-01	Block 3	35	Natural resource vegetation	A	3	Chinese Spring	10	0
2018-04-01	Block 3	35	Natural resource vegetation	A	4	Chinese Spring	10	0
2018-04-01	Block 3	36	Natural resource vegetation	A	1	Chinese Spring	10	2
2018-04-01	Block 3	36	Natural resource vegetation	A	2	Chinese Spring	10	0
2018-04-01	Block 3	36	Natural resource vegetation	A	3	Chinese Spring	10	0
2018-04-01	Block 3	36	Natural resource vegetation	A	4	Chinese Spring	10	0
2018-04-01	Block 3	36	Natural resource vegetation	A	5	Chinese Spring	10	0
2018-04-01	Block 3	37	Natural resource vegetation	A	1	Svevo	10.1	0
2018-04-01	Block 3	37	Natural resource vegetation	A	2	Svevo	10.1	0
2018-04-01	Block 3	37	Natural resource vegetation	A	3	Svevo	10.1	0
2018-04-01	Block 3	37	Natural resource vegetation	A	4	Svevo	10.1	0
2018-04-01	Block 3	37	Natural resource vegetation	A	5	Svevo	10.1	0
2018-04-01	Block 3	37	Natural resource vegetation	A	6	Svevo	10.1	0
2018-04-01	Block 3	37	Natural resource vegetation	A	7	Svevo	10.1	0
2018-04-01	Block 3	37	Natural resource vegetation	A	8	Svevo	10.1	1
2018-04-01	Block 3	38	Natural resource vegetation	A	1	Svevo	10.1	3
2018-04-01	Block 3	38	Natural resource vegetation	A	2	Svevo	10.1	6
2018-04-01	Block 3	38	Natural resource vegetation	A	3	Svevo	10.1	6
2018-04-01	Block 3	38	Natural resource vegetation	A	4	Svevo	10.1	17
2018-04-01	Block 3	38	Natural resource vegetation	A	5	Svevo	10.1	1
2018-04-01	Block 3	38	Natural resource vegetation	A	6	Svevo	10.1	2
2018-04-01	Block 3	31	Margin wheat resource	B	1	Rotem	10.5	24
2018-04-01	Block 3	31	Margin wheat resource	B	2	Rotem	10.5	18
2018-04-01	Block 3	31	Margin wheat resource	B	3	Rotem	10.5	6
2018-04-01	Block 3	31	Margin wheat resource	B	4	Rotem	10.5	24
2018-04-01	Block 3	32	Margin wheat resource	B	1	Rotem	10.5	12
2018-04-01	Block 3	32	Margin wheat resource	B	2	Rotem	10.5	14
2018-04-01	Block 3	32	Margin wheat resource	B	3	Rotem	10.5	4
2018-04-01	Block 3	32	Margin wheat resource	B	4	Rotem	10.5	24
2018-04-01	Block 3	32	Margin wheat resource	B	5	Rotem	10.5	5
2018-04-01	Block 3	33	Margin wheat resource	B	1	Zavitan	10.1	0
2018-04-01	Block 3	33	Margin wheat resource	B	2	Zavitan	10.1	3
2018-04-01	Block 3	33	Margin wheat resource	B	3	Zavitan	10.1	0
2018-04-01	Block 3	33	Margin wheat resource	B	4	Zavitan	10.1	0
2018-04-01	Block 3	33	Margin wheat resource	B	5	Zavitan	10.1	1
2018-04-01	Block 3	33	Margin wheat resource	B	6	Zavitan	10.1	0
2018-04-01	Block 3	34	Margin wheat resource	B	1	Zavitan	10.1	1
2018-04-01	Block 3	34	Margin wheat resource	B	2	Zavitan	10.1	2
2018-04-01	Block 3	34	Margin wheat resource	B	3	Zavitan	10.1	2
2018-04-01	Block 3	34	Margin wheat resource	B	4	Zavitan	10.1	1
2018-04-01	Block 3	35	Margin wheat resource	B	1	Zavitan	10.1	0
2018-04-01	Block 3	35	Margin wheat resource	B	2	Zavitan	10.1	0
2018-04-01	Block 3	35	Margin wheat resource	B	3	Zavitan	10	1
2018-04-01	Block 3	35	Margin wheat resource	B	4	Zavitan	10.1	2
2018-04-01	Block 3	36	Margin wheat resource	B	1	Zavitan	10	2
2018-04-01	Block 3	36	Margin wheat resource	B	2	Zavitan	10.1	2
2018-04-01	Block 3	36	Margin wheat resource	B	3	Zavitan	10	0
2018-04-01	Block 3	36	Margin wheat resource	B	4	Zavitan	10.1	1
2018-04-01	Block 3	37	Margin wheat resource	B	1	Svevo	10.1	7
2018-04-01	Block 3	37	Margin wheat resource	B	2	Svevo	10.1	12
2018-04-01	Block 3	37	Margin wheat resource	B	3	Svevo	10.1	3
2018-04-01	Block 3	37	Margin wheat resource	B	4	Svevo	10.1	2
2018-04-01	Block 3	37	Margin wheat resource	B	5	Svevo	10.1	1
2018-04-01	Block 3	37	Margin wheat resource	B	6	Svevo	10.1	4
2018-04-01	Block 3	37	Margin wheat resource	B	7	Svevo	10.1	9
2018-04-01	Block 3	38	Margin wheat resource	B	1	Svevo	10.1	15
2018-04-01	Block 3	38	Margin wheat resource	B	2	Svevo	10.1	5
2018-04-01	Block 3	38	Margin wheat resource	B	3	Svevo	10.1	4
2018-04-01	Block 3	38	Margin wheat resource	B	4	Svevo	10.1	3
2018-04-01	Block 3	38	Margin wheat resource	B	5	Svevo	10.1	2
2018-04-01	Block 3	38	Margin wheat resource	B	6	Svevo	10.1	2
2018-04-01	Block 3	38	Margin wheat resource	B	7	Svevo	10.1	2

## Sheet: Table S2
Table S2. Classification of natural vegetation grown the west side of the field.
Family	Species
Asteraceae	Calendula arvensis
	Senecio vernalis
	Chrysanthemum coronarium
	Sonchus oleraceus
	Anthemis melampodina
	Centaurea damascena
Brassicaceae	Nasturtiopsis coronopifolia
	Erucaria microcarpa
	Sisymbrium irio
	Matthiola livida
	Diplotaxis harra
	Sinapis alba
Caryophyllacaeae	Spergula falax
Chenopodiaceae	Atriplex halimus
Fabaceae	Trigonella arabica
	Vicia monantha
	Medicago sativa
Malvaceae	Lavatera punctata
	Malva nicaeensis
Poaceae	Setaria verticillata
	Avena sterillis

## Sheet: Table S3
Table S3. Untargeted metabolic raw data generated by the UPLC-qTOF-MS in negative and positive ion modes.
				Chinese Spring March 25th 2018					Chinese Spring April 13 2018					Rotem March 25th 2018					Rotem April 13 2018					Svevo March 25th 2018					Svevo April 13 2018					Zavitan March 25th 2018					Zavitan April 13 2018
Ion Mode	Retention time (RT)	m/z	ID (RT_m/z)	CS_1-1	CS_1-2	CS_1-3	CS_1-4	CS_1-5	CS_2-1	CS_2-2	CS_2-3	CS_2-4	CS_2-5	RT_1-1	RT_1-2	RT_1-3	RT_1-4	RT_1-5	RT_2-1	RT_2-2	RT_2-3	RT_2-4	RT_2-5	SV_1-1	SV_1-2	SV_1-3	SV_1-4	SV_1-5	SV_2-1	SV_2-2	SV_2-3	SV_2-4	SV_2-5	ZT_1-1	ZT_1-2	ZT_1-3	ZT_1-4	ZT_1-5	ZT_2-1	ZT_2-2	ZT_2-3	ZT_2-4	ZT_2-5
Negative	0.6034	57.0383	0.6034_57.0383	0.3835	0.653	0.901	0.6504	0.2832	1.3523	1.4661	1.23	0	1.4337	0.5795	0.351	0.7531	0.771	0.4889	0.9729	0	1.0501	1.0442	0.9545	0	0.4125	0.8202	0.6727	0.5508	0.687	0	1.5178	1.6287	0.8487	0	0	0.443	0.5289	0	1.5551	1.6361	1.1527	1.6211	1.022
Negative	0.5073	57.0388	0.5073_57.0388	2.4971	2.248	2.4545	1.443	2.808	0	1.9123	1.4196	1.8976	1.6543	1.9122	2.9415	2.4259	1.5231	3.2148	0.6276	0	0	0	1.2552	1.7589	1.4197	1.382	1.4824	1.6849	0	1.6038	1.6648	1.8493	0.7257	1.6076	1.4776	4.9325	1.7308	1.8848	1.3597	1.354	1.103	1.2292	0.6932
Negative	2.8247	59.0161	2.8247_59.0161	0	0	0	0	0	0.7796	0	0	1.605	0	0	0	0	0	0	3.728	3.1379	3.8834	0	2.8831	0	0	0	0	0	0	1.3267	1.071	1.8837	0	0	0	0	0	0	0	0	2.0682	1.9196	0
Negative	2.9955	59.0164	2.9955_59.0164	0	0	0	0.3742	0	0	3.121	2.636	1.8718	1.484	0	0	0.3962	0	0	6.8353	6.6313	6.1732	4.0158	2.9054	0	0	0	0	0	0	1.8702	0	2.4679	0	0	0	0.5768	0	0	2.3486	1.9121	2.5094	0	0
Negative	3.0995	59.0165	3.0995_59.0165	0.8305	0	0	0	0	6.203	5.2973	4.1148	4.6315	3.6849	4.1332	6.3495	4.4893	4.7108	5.6005	22.7757	12.3382	12.9647	10.9836	7.3794	0	3.7284	2.1268	2.0808	3.7885	0	3.8742	5.5956	3.3798	2.7185	3.2487	2.8281	4.1914	1.593	1.6341	6.034	5.01	5.5434	5.7587	2.7705
Negative	4.2563	59.0165	4.2563_59.0165	0	0.471	0	0	0	0	0	0	0	0.8786	0.5598	0	0.3701	0	0	0	0	0.8261	0	1.7595	0	0	0	0.9528	0	0.5733	1.1711	0	1.3721	0.8316	0	1.4114	0	0.9657	0	2.5023	3.0382	2.6315	0	2.8413
Negative	4.0937	59.0166	4.0937_59.0166	4.7987	3.8369	3.817	3.8733	3.4011	3.2158	0	2.5642	3.5042	2.8423	8.0287	4.8908	4.6192	9.9105	6.9733	5.1489	4.1725	4.394	3.4184	5.2948	6.0419	5.3395	4.3529	6.3236	7.545	5.0273	5.589	4.6722	5.8916	3.7463	7.6535	7.5438	5.6756	6.7327	11.1404	5.2496	8.2281	4.7189	5.0152	5.9717
Negative	4.4523	59.0166	4.4523_59.0166	3.3839	2.5887	1.9569	2.6917	2.6514	0	0	0	0	0	2.7987	0	0	0	0	0	0	0	0	0	0	0.6064	0	0	0	0	0	0	0	0	0	3.6392	3.4307	4.1502	0	0	0	0	0	0
Negative	3.2411	59.0166	3.2411_59.0166	0	0	0	0	0	11.4191	1.8074	3.1409	8.1269	5.7874	25.1444	4.2925	24.5033	36.7544	7.1307	24.1654	13.7983	11.8333	15.4213	4.7903	0	3.7284	0	0	3.755	0	0.8087	0	0	0	3.2402	2.8094	4.1914	0	0	0	0	0	0	0
Negative	3.9768	59.0167	3.9768_59.0167	2.993	0	0	2.4216	2.5604	2.936	0	2.2	2.593	2.6835	3.1141	0	2.9318	3.532	1.9596	2.6172	2.2572	2.6303	2.2566	3.4386	3.4521	3.1587	3.2892	3.8635	2.9781	3.6037	4.9029	4.521	5.4244	3.0378	2.7854	0	0	0	0	3.586	4.4419	3.8535	4.4554	5.4576
Negative	3.7638	59.0167	3.7638_59.0167	0	0	2.5928	2.4404	0	2.2729	0	0.2973	0	0	0	3.4164	0	0	1.393	0	0	0	0	0	0.9005	0	0	0	0	0	0	0	0	0	2.3087	0	1.6402	0	0	0	0	0	0	0
Negative	3.8652	59.0167	3.8652_59.0167	0	1.5478	0.5115	1.4723	2.5994	2.2729	0	0	2.1423	0	0	0	0	0	0	0	0	0	0	0	0	0.3548	0	0	0	2.184	2.6914	2.5415	2.9481	1.4835	0	0	0	0	0	0	0	0	1.8776	0
Negative	4.3519	59.0168	4.3519_59.0168	0	0.7157	0	0	0	0	0	0	0	1.3471	4.2142	0	0	4.5075	3.2194	0	0	2.3237	0	1.8295	0	0	0.7397	1.1172	0	0	0.0845	0.1908	0	0	5.8761	6.1299	4.7338	5.5095	6.9351	5.009	6.0321	5.2909	0	3.6141
Negative	0.6081	59.0172	0.6081_59.0172	0	0	3.4179	0	1.0171	1.5558	1.5357	0	3.1604	1.5318	0	0	1.6948	0	0	0	2.016	0	1.9416	0	0	0	1.8146	1.0835	1.1971	1.0886	0	2.3458	2.2842	0	0	0	0	0	0	0	0	0	0	0
Negative	0.4958	59.0175	0.4958_59.0175	6.2733	9.6998	12.7796	4.3765	6.3076	8.5471	2.539	2.9284	11.0508	7.1834	6.1654	6.386	5.5193	10.0473	4.9192	7.3544	5.7465	5.648	4.9669	9.1775	6.0199	6.0831	7.4713	6.1848	5.1788	2.7173	3.572	3.6533	3.5185	4.1261	4.9579	4.9791	11.9218	6.6064	6.748	6.9572	11.0152	7.6105	7.8114	12.3447
Negative	2.8244	563.241	2.8244_563.241	0	0	0	0	0	0	0	1.4934	0	0	0	0	0	0	0	0	1.4731	2.2807	0	1.3261	0	0	0	0	0	0	2.6095	2.6906	3.0347	0.8105	0	0	0	0	0	0	0	0	0	0
Negative	4.5847	563.338	4.5847_563.3376	0	0	0	0	0	0	0	0	0	0	0	0	0	0	0	5.5502	0	0	0	1.4718	0	0	0	0	0	0	0	0	0	0	0	0	0	0	0	3.6272	2.1619	0	6.5061	0
Negative	4.8452	563.341	4.8452_563.3411	0	8.9869	6.0688	6.9148	6.7366	26.2608	27.9361	17.9145	15.8301	18.0691	10.5971	10.0113	7.2187	10.1829	12.174	41.9096	16.8718	22.7353	11.5542	13.8663	0	10.6774	3.5544	6.4175	7.449	29.7847	45.6691	66.3532	61.2357	40.3438	5.0794	6.331	0	4.6639	5.9746	11.3063	13.4413	9.4231	0	18.0138
Negative	5.2681	563.341	5.2681_563.3414	0	0	0	0	0	3.0532	5.5749	0	0	1.6432	0	10.0234	0.6424	0	0	0	0	0	0	0	0	0	0	0	0	0	0	0	0	0	0	0	0	0	0	0.1644	0	0	0	0
Negative	4.6975	563.342	4.6975_563.3422	0	7.4294	6.298	6.7516	6.318	15.948	17.6025	15.8321	10.9457	13.632	7.236	12.1941	7.2913	8.5089	13.0271	16.2783	16.8718	17.0278	11.5542	12.5035	5.8225	7.6536	4.341	6.2382	7.9458	12.0901	15.0222	17.8553	20.0546	20.3528	5.9938	5.6063	0	4.7309	6.533	11.8445	15.6289	15.9064	18.0382	18.0138
Negative	4.9664	563.342	4.9664_563.3424	0	2.5711	0	3.1219	5.1065	7.1622	7.7954	7.021	5.956	4.1807	3.9134	37.1422	6.5822	9.628	10.2471	14.3216	9.1289	13.5979	5.2102	6.8158	0	6.7747	6.2182	8.3231	5.2092	12.6535	16.0214	21.1179	17.1508	13.9127	8.2704	8.7939	0	6.8896	7.5315	8.2646	11.2019	14.1088	18.7543	13.4638
Negative	4.3032	563.343	4.3032_563.3435	0	0	0	0	0	1.9949	3.5614	0	0	0	0	0	0	0	0	2.2142	1.7669	2.143	0	0	0	0	0	0.322	0	2.6409	1.222	0	1.6522	2.2209	0	0	0	0	0	0	1.0788	0	0.8241	0.7706
Negative	4.1461	564.28	4.1461_564.28	0	0	0	0	0	4.3255	0	0.9197	2.7984	0.8065	0	0.1937	0	0	0	0.6684	2.0344	0.6337	1.7213	0	0	0	0	0	0	1.4101	3.0177	1.9518	2.6082	1.8503	0	0	0	0	0	0.8034	0	0.2157	1.0613	0.5726
Negative	0.5757	565.041	0.5757_565.0412	3.1027	3.7861	4.5111	3.1079	4.1558	0	0	0	0	0	5.3656	3.1206	5.4601	3.4421	2.7699	0	0	0	0	0	4.4632	2.7168	8.4089	4.172	4.4184	0	0	0	2.1029	0	4.6232	5.0528	6.7855	6.4891	5.9737	3.1088	0	0	0	0
Negative	2.3808	565.156	2.3808_565.1564	0	0	0	0	0	0	0	0	0	0	0	0	0	0	0	0	0	0	0	0	0	0	0	0	0	0	0	0	0	0	6.1935	8.0175	5.2044	6.6018	0	0	0	0	0	0
Negative	3.2076	565.194	3.2076_565.1937	3.2812	2.7184	4.0505	3.6248	3.6368	0	0	0	0	0	0	0	2.5536	2.4556	2.8221	1.0915	0	0	0	0	4.3397	3.2275	5.5655	5.2136	2.2908	0	0	1.674	0	0	10.7299	9.1005	8.1795	12.4087	6.5133	3.4781	2.4548	4.5628	5.041	0
Negative	3.7284	565.224	3.7284_565.2241	0	0	0	0	0	1.0455	1.6666	1.711	0	0	0	0	0	0	0	0	0	0	0	0	0	0	0	0	0	0	0	0	0	0	0	0	0	0	0	0	1.0981	2.5698	2.5167	2.4812
Negative	7.3996	565.277	7.3996_565.2769	0	0	0.1864	0.1248	0	2.131	2.0315	1.5088	0.4142	0	0	0	0	0	0	0.5359	0.9056	0.7706	5.1659	2.53	0	0	0	0	0	0.9667	1.0772	1.864	0.47	1.0612	0	0	0	0	0	0.4084	0.7005	0.8203	0.6927	0.5506
Negative	5.8138	565.301	5.8138_565.3008	0	0	0	0	0	0	0	0	0	0	0	0	0	0	0	0	0.9834	0.5152	0.8958	0.7639	0	0	0	0	0	0.5432	3.7632	3.1061	1.5804	0.9226	0	0	0.2998	0	0	0	0	0.2561	0	1.6106
Negative	4.5632	565.359	4.5632_565.359	5.6412	6.2226	3.3278	6.6497	5.7464	11.5078	9.5581	10.3291	9.1548	10.2653	6.8688	5.4999	6.2571	7.94	8.1202	9.0813	9.6063	14.3379	6.266	12.3694	6.3959	8.9265	4.5209	6.3508	7.9057	7.6677	12.2114	13.1129	15.5334	13.5856	6.581	5.9079	5.5472	5.0309	9.0903	9.16	13.3479	13.1544	17.3074	14.688
Negative	1.9647	567.117	1.9647_567.1172	0	0	0	0	0	0	0	0	0	0	0	0	2.0987	0.4419	0	0	1.3405	0.4125	0.7209	0	5.7826	3.6042	7.0252	5.916	3.9537	11.7414	5.6911	5.1728	1.6518	0	0	0	0	0.1923	0	0	0	0	0	0.0923
Negative	0.6943	67.0214	0.6943_67.0214	0.4688	3.9057	4.5821	0	0	4.0225	4.1283	3.8502	2.9273	4.9171	4.0172	4.7715	5.0692	5.9629	3.9222	3.0959	2.5795	2.5952	2.6848	3.2449	4.4083	4.0308	6.2024	4.9199	3.5843	4.9212	6.3462	3.8382	3.8054	5.6809	5.2739	4.0341	3.131	5.7752	0	0	0	3.2399	2.7172	0
Negative	1.2971	67.0214	1.2971_67.0214	6.0105	8.0926	9.1663	13.2055	6.3285	3.3302	0	2.9183	3.5278	2.9655	4.3909	4.4332	3.8915	4.6881	3.3615	0.4216	1.6345	1.4886	4.2711	2.272	5.7354	5.1609	3.6141	5.8767	5.5207	0	0	0	0	0	7.7245	6.1539	6.0019	9.3876	8.3133	9.7931	7.1382	5.848	5.7046	5.2684
Negative	1.1967	67.0215	1.1967_67.0215	0	0	0	0	0	0	0	1.25	0	0.9484	0	0	0	0	0	0	0	0	1.5057	1.2936	0	0	0	0	0	0	0	0	0	0	0	0	0	0	0	3.6841	2.1413	1.7089	1.4222	2.4641
Negative	0.5371	67.0233	0.5371_67.0233	1.874	1.5892	2.4924	1.9565	2.0369	0	0	0	0	1.3776	2.3795	2.0331	2.2826	3.7264	1.9221	0.3646	0	0	0	0	2.5095	2.8776	3.9094	4.071	2.8653	0	3.8557	2.318	1.9344	0	3.0359	2.9926	1.8177	3.4815	2.278	2.9687	0	0	1.2235	1.8162
Negative	0.4414	70.9997	0.4414_70.9997	3.9285	0	0	4.4031	0	0	0	7.1044	4.1818	1.8009	3.9817	0	3.6462	4.1517	4.8114	3.6091	0	2.732	0	0	3.6386	3.6121	3.2614	4.566	3.9208	3.4699	4.8083	3.4084	3.131	0	2.9321	0	5.1866	3.5818	4.027	3.5615	3.099	0	3.0799	0
Negative	0.5071	71.0154	0.5071_71.0154	18.0044	17.2764	27.7593	17.1542	14.6098	29.0452	20.9539	19.3052	29.5822	21.1412	15.3407	23.1372	16.4424	15.7669	22.0246	37.1719	28.1268	24.4215	25.2983	24.844	13.942	20.1155	22.3997	26.6302	14.1071	33.0948	20.9178	16.0181	14.7683	34.4169	12.8317	13.6095	16.1378	16.5172	11.3259	20.4895	36.3387	24.4793	19.0265	22.5892
Negative	0.7211	71.0158	0.7211_71.0158	0	0	2.4911	0	0	0	0	0	0	0	1.6971	0	2.504	0	0	9.3153	0	4.7641	0	1.5889	0.6882	0	2.1042	0	0	10.0409	4.2763	3.5731	3.9381	12.7916	1.5681	0	0	1.2082	0	0	0	5.5606	0	0
Negative	0.6173	71.0162	0.6173_71.0162	3.7037	8.3504	0	0	4.2123	15.7567	7.2967	16.9116	11.4063	21.1412	8.9545	7.015	9.6595	8.4826	2.7328	32.8649	0	8.72	20.9028	15.0223	5.6601	11.4626	14.4791	0	0	29.4104	17.2035	6.5605	3.9381	29.6243	5.5933	4.1059	3.8531	5.2463	5.8915	5.8547	14.5435	9.9018	6.1189	22.5892
Negative	0.7665	73.0306	0.7665_73.0306	0	0	0	0	0	0	0.7736	0.6636	0	0	0	0	0	0	0	1.2683	0	0.7399	0.6151	1.9783	0	0	0	0	0	1.716	0.7927	0.9203	0	1.374	0	0	0	0	0	0	0	0	0	0.7125
Negative	4.0831	73.0314	4.0831_73.0314	0	0	0	0	0	0	0	0	1.2259	1.0056	3.6699	0	0	4.381	2.4391	1.5573	0	2.3334	1.1473	1.8583	0	0	0	0	0	1.5157	1.8549	1.9247	2.6701	1.5671	6.0979	3.989	4.0036	4.4609	5.0269	1.9183	3.3459	0	1.9265	2.8456
Negative	3.9767	73.0314	3.9767_73.0314	0.7521	0	0.6399	0	0	1.8662	1.4437	0	1.9146	1.3282	0.9157	0	0	0	0.6475	0	1.1925	1.7221	1.0885	1.5486	0	0	1.0753	1.4982	0	2.2013	2.8687	2.6916	3.6748	1.5797	1.021	0	0.4959	0.7692	0	1.9564	2.8838	2.4711	3.156	2.8796
Negative	0.5146	75.0102	0.5146_75.0102	2.1421	1.8608	2.131	0	0	0.8706	0.9257	0.9655	1.12	0.6004	1.4145	2.3047	0	0	2.6658	1.8074	0.974	1.3592	1.257	1.7943	0	1.8555	1.9685	2.3237	1.4904	1.0191	0.9456	0.8364	1.121	0	1.367	1.7287	0	2	1.6916	1.5587	1.5335	0.8279	0.8758	0.7751
Negative	0.4993	78.961	0.4993_78.961	2.9331	0	3.2636	1.6413	2.2069	0.6045	0	0	0	0	2.8164	2.4032	0	0	0	0	0	0	0.5742	0	2.1528	1.3693	3.0208	2.3264	0	0.365	1.3615	1.0105	0	0	2.8335	3.9827	4.6456	4.3802	3.0893	0	0	0	0	0
Negative	0.5653	78.9614	0.5653_78.9614	2.9331	3.007	4.2287	2.178	1.9254	0	0	0	3.0929	1.4104	2.7883	0	3.8268	2.0935	0.7478	0.2757	1.0709	0	0.7641	1.3533	0	1.5557	2.7001	1.5594	1.9652	0.4378	3.161	2.4673	2.6792	0	3.1591	3.9827	4.6456	5.2437	2.6755	3.0057	0.8497	0	0	0
Negative	0.5261	83.0174	0.5261_83.0174	1.6908	2.3742	2.9246	1.971	2.0153	1.5357	0	1.2074	1.982	1.5897	2.1427	1.5612	2.6474	2.4503	2.4014	0	1.9409	1.7199	0	1.3959	1.5316	1.4553	1.9001	1.9303	1.8187	0	1.7862	1.8565	1.6225	1.1878	1.3225	1.5982	3.0927	2.3938	1.7892	0	1.662	1.7871	1.7941	1.6619
Negative	0.7814	85.0294	0.7814_85.0294	38.6254	71.7315	81.7945	42.3698	38.1199	43.6335	14.9368	20.3611	55.2099	78.6696	50.9142	45.7238	47.6732	41.0769	32.1544	16.2554	34.0827	24.3321	35.9073	32.8173	53.4578	59.0555	53.6899	37.9159	50.9795	16.9053	18.6251	10.9593	13.86	18.5656	66.0493	51.8417	61.5009	81.6606	40.7894	56.8428	53.3462	65.4934	47.6234	55.1063
Negative	6.614	567.15	6.614_567.1496	0	0	1.6156	8.2641	0.7012	17.1056	9.2053	10.5205	13.1566	9.4862	4.3315	0	6.0699	6.5861	0	2.3048	9.2381	2.923	2.8365	1.8597	4.4126	0	4.2531	4.6342	1.1016	10.9061	20.0498	9.2575	4.1151	24.6243	1.2562	0	0	0.8077	0	0	2.4626	13.9606	11.5762	7.3225
Negative	2.9256	567.198	2.9256_567.1977	3.6732	4.483	6.2417	4.7681	3.102	0	0	0	0	0	4.8303	3.3285	3.9758	5.2482	3.0737	0	0	0	0	0	2.308	2.3197	3.6074	4.1154	1.8787	0	0	0	0	0	4.4262	2.7266	1.9759	3.2985	1.6414	0	0	0	0	0
Negative	2.9308	567.211	2.9308_567.2106	3.6732	4.483	6.2417	4.7681	3.102	0	0	0	0	0	4.8303	3.3285	3.9758	5.2482	3.0737	0	0	0	0	0	2.308	2.3197	3.6074	4.1154	1.8787	0	0	0	0	0	4.4262	2.7266	1.9759	3.2985	1.6414	0	0	0	0	0
Negative	7.0431	567.319	7.0431_567.3186	0	0	0	0	0	0	0.0908	0	0	0	0	0	0	0	0	0	1.1764	0.4906	0.9851	0.3722	0	0	0	0	0	0.5422	3.0249	3.2252	0.6122	0.9067	0	0	0	0	0	0	0.2884	0.216	0.2749	2.0487
Negative	2.0932	569.114	2.0932_569.1143	0	0	0	0	0	0	0	0	0	0	0	0	0	0	0	0	0	0.6785	0	0.5952	0	0	0	0	0	0	0	0	0	0	0	0	0	0	0	3.6024	5.5855	0	3.3618	3.2574
Negative	2.2521	569.115	2.2521_569.1147	0	0	0	0	0	0	0	0	0	0	3.037	5.033	0.4582	0	3.92	1.1911	1.3766	0	1.5934	0	0	0	0	0	0	0	0	0	0	0	8.3488	13.5681	12.7723	7.5843	11.0275	7.0219	9.7587	7.5004	8.5182	6.1593
Negative	1.7224	570.154	1.7224_570.1535	0.9072	0	0	0	0.9331	0	0	0	0	0	1.9826	2.1172	3.6897	0	5.561	3.2945	0	0	0	0	7.4134	7.9539	4.8777	6.2667	7.1648	0	0	0	0	0.0404	0.6586	0	0	0	0	0	0	0	0	0
Negative	1.6132	570.151	1.6132_570.1513	0	0	0	0	0	0	0	0	0	0	0	0	1.92	0	3.7387	2.126	4.8926	0	3.0424	0.4047	4.019	4.475	2.2221	3.4388	4.0249	7.448	5.0314	7.9912	2.7417	3.7485	0	0	0	0	0	0	0	0	0	0
Negative	1.4504	570.154	1.4504_570.1536	0	0	0	0	0	0	0	0	0	0	0	0	0	0	1.2348	0	1.9759	0	1.58	0.4199	0	2.5064	0	1.4909	1.4147	3.4966	1.3924	2.968	0.71	1.9676	0	0.5557	0	0	0	0	0	0	0	0
Negative	0.464	570.843	0.464_570.8433	0	0	0	0.1644	0	1.4636	0.7711	1.8111	2.9373	1.3667	0	0	0	0	1.7413	0	1.1402	0.8603	1.4483	0.7096	0	0	0	0	0	1.0836	0.5836	1.8688	2.1739	1.4233	0	0	0	0	0.3724	1.7044	0.6064	0.8524	0	0.1349
Negative	0.5685	571.101	0.5685_571.1012	0	1.2707	0.7478	0	0	0	0	0.4331	0.8083	0.7597	0	0	0.823	0	0	0.3833	0.8496	0	0.6812	0.6993	0.7167	1.7335	0	0	0	0.9993	2.5344	2.2714	2.1837	1.1965	0	0	0	1.7404	1.2199	0	0	0	0	0.4849
Negative	4.3063	571.109	4.3063_571.1094	0	0	0	0	0	1.1778	0	0	0	0	0	0	0	0	0	0	1.6589	0	0	0	0	0	0	0	0	0.9802	1.3123	1.3521	1.9009	1.5999	0	0	0	0	0	0.8166	1.1636	0	1.6866	1.2316
Negative	3.0418	571.112	3.0418_571.112	0	0	0.4939	0	0	0	0	0	0	0	0	2.9525	1.71	1.9483	2.4363	0	0	0	0	0	0	0	0.6969	0	0	0	0	0	0	0	0	0	0	0	0	0	0	0	0	0
Negative	1.5403	571.131	1.5403_571.131	0	0	0	0	0	0	0	0	0	0	3.6764	2.8892	5.8382	0	10.783	0	11.9637	0	0	0	10.0286	16.3777	5.1731	10.8207	11.7431	16.8864	10.1385	16.9459	3.8903	0	0	0	0	0	0.8946	0	0	0	0	0
Negative	0.5197	571.14	0.5197_571.1401	0.9238	0	0.3728	0.3948	0.935	0	0	0	0	0	0	0	0.7104	0	0.523	2.8635	5.5266	1.7146	3.3458	1.2857	0.5751	0	0.4755	0.4557	0	4.1294	6.4034	8.386	3.9532	3.721	1.1547	0.8159	1.9259	0	0.73	0	0	0	0.8278	0.5449
Negative	1.7131	571.147	1.7131_571.1466	3.4611	0	0	1.6812	3.5495	0	0	0	0	0	8.2729	8.2539	15.8875	1.7256	22.5629	12.8179	0	0	0	0	31.7708	32.0708	18.4402	27.2711	27.3181	24.419	0	0	0	0	0	0	0	0.5	1.6009	0	0	0	0	0
Negative	0.9195	85.0307	0.9195_85.0307	0	3.675	0	2.8105	1.3319	2.6576	1.1554	1.2776	0	0	1.6344	0	1.8923	1.5422	1.6575	0.9469	2.1532	0	0	2.7584	0	2.6938	2.1074	1.6859	0	0.8405	1.0301	0	0	1.6526	3.1247	0	2.2284	3.0985	1.2974	0	5.9097	0	4.083	0
Negative	0.523	85.0309	0.523_85.0309	4.6304	5.0999	5.6993	5.8658	4.4686	29.9544	6.0503	9.471	46.3803	38.2471	8.3646	5.1927	5.8108	9.4999	5.8462	7.4224	18.0631	8.1749	24.1912	15.9846	8.7246	7.3286	9.6441	9.4541	6.4279	6.9047	13.2098	9.4811	9.5523	6.1985	7.7682	6.9044	6.6493	9.5908	5.721	57.2796	38.4248	41.5285	45.8069	49.5587
Negative	0.6633	85.031	0.6633_85.031	8.9992	22.5311	20.7571	15.1298	10.1753	13.6426	4.0075	4.174	17.7554	14.7553	10.1356	10.2835	10.2583	10.3877	8.3775	12.5343	7.1163	4.8448	9.0531	10.1071	7.7921	16.7532	12.2808	9.9181	10.6932	13.5043	18.6251	10.9593	13.8238	17.1192	9.2909	12.3002	7.8754	11.6093	9.2242	15.409	5.9086	14.3186	15.5016	21.2329
Negative	0.4687	86.988	0.4687_86.988	0	0	0	1.7384	0	2.2494	2.1833	2.1604	2.1376	1.6613	0	0	1.8148	0	2.9129	1.3378	0	0	0	1.3938	2.2207	0	0	0	2.5617	1.3363	0	1.4163	1.4912	1.2113	0	0	4.1705	0	2.5441	0	1.6747	0	0	0
Negative	0.6726	87.0094	0.6726_87.0094	4.1212	8.2405	4.9513	4.6311	5.0011	1.4947	0	0.8277	0	2.2212	10.1859	10.1787	9.8344	11.4577	7.2476	0	0	0	1.3822	0	9.8504	9.9517	13.0558	9.4351	7.0601	0	1.2752	0	0.9522	0	10.9211	9.5913	5.6214	12.5294	7.9729	1.1628	0	0	0	0
Negative	0.5201	87.0104	0.5201_87.0104	8.9741	18.726	24.2565	5.8008	7.9285	3.2223	3.4053	1.9641	3.2303	3.4514	7.1682	8.3443	5.4643	4.9622	4.5479	3.5121	3.5414	2.588	3.3001	3.1518	6.4711	10.634	11.4929	8.7322	9.4001	3.8151	7.5464	4.888	6.528	2.0403	7.8704	8.7144	8.6691	10.3573	3.6444	6.4055	4.6676	3.5656	4.4446	2.6014
Negative	0.4823	88.0424	0.4823_88.0424	2.8355	1.4388	3.3852	1.4977	1.5091	0.2928	0	0.3032	0.5759	0	2.4747	1.8483	1.7834	2.2364	1.2084	0	0	0	0	0	2.1459	1.9512	1.5505	1.8698	3.0521	0	0	0	0	0	0.9822	1.0831	4.8142	1.035	1.4597	0	0	0	0	0.3075
Negative	4.0779	89.0237	4.0779_89.0237	0	0	0	0.5603	0	0	0	0	0	0	0	0	0	0	0	0	0	0	0	0	0	0	0	0	0	1.0556	1.0625	0	1.7499	0.9741	0.8793	0	0	0	0	1.298	0	0	0.9405	1.4492
Negative	2.3538	89.0249	2.3538_89.0249	3.7065	2.8449	2.369	2.9939	2.5494	0	0	0	0	0	3.4991	3.465	2.862	4.24	4.7755	0	0	0	0	0.2225	0	0	0	0	0	0	0	0	0	0	0	0	0	0	0	0	0	0	0	0
Negative	0.721	89.0252	0.721_89.0252	0	0	0	0	0	0	1.4409	1.8585	2.7391	1.9509	0	0	0	0	0	5.7834	0	0	1.2461	2.1534	0	0	0	0	0	0	3.1112	2.0041	3.8025	1.4483	0	0	1.0204	0	0	0	2.6949	4.8805	0	5.8311
Negative	0.6469	89.0255	0.6469_89.0255	0	0	0	0	0	0	4.898	5.9749	2.7391	2.9237	4.2221	0	4.1207	0	0	8.1455	2.3214	0	0	3.7254	0	0	0	4.1353	0	5.1323	3.1112	2.0041	3.8025	4.3298	4.4007	2.7692	2.9881	5.4188	0	0	2.6949	4.8805	0	3.6796
Negative	0.8548	89.0258	0.8548_89.0258	0	0	1.5344	0	0	0.8992	0	0.7952	0.8292	0	1.7217	2.3754	2.3664	2.2494	1.5595	0	0.7341	1.1109	0	1.4689	1.221	1.2294	1.6857	1.3816	0.9581	0	1.1174	0	1.2289	2.0692	2.1743	1.2583	1.9242	1.9442	0	0.9774	1.2987	0	0	1.3007
Negative	0.4977	89.0261	0.4977_89.0261	5.6965	6.6889	9.7915	6.1917	6.7993	10.5027	8.0153	8.1678	13.113	7.3852	7.354	7.6228	7.7418	10.874	7.0811	8.1455	7.6643	7.4201	7.0585	9.8923	7.3855	5.3252	9.1468	7.2098	7.5318	6.7711	7.2428	6.786	6.0983	7.7382	7.3001	7.6517	12.8872	9.4641	10.5447	11.3918	12.5624	9.1933	10.4666	13.0361
Negative	5.1356	91.0002	5.1356_91.0002	0	0	0	0	0	7.2925	0	0	0	0	0	0	0	0	0	0	0	0	0	0	0	0	0	0	0	6.5897	0	0	0	0	0	0	0	0	0	0	0	0	0	0
Negative	2.8503	91.0022	2.8503_91.0022	0	0	0	0	0	0	0	0	0	0	0	0	0	0	0	0	0	0	0	0	0	0	0	0	0	0	3.0538	0	0	0	0	0	0	0	0	0	11.3965	3.263	0	0
Negative	8.0116	91.0023	8.0116_91.0023	0	0	0	0	0	0	0	0	0	0	0	0	0	0	0	0	0	0.6458	0	0	0	0	0	0	0	2.2616	2.276	1.8913	0	0	0	0	0	0	0	0	0	1.6397	0	0
Negative	1.6057	571.147	1.6057_571.1468	0	0	0	0	0	0	0	0	0.2874	0	0	5.6677	7.2678	0	13.4418	8.9266	20.1962	6.3227	14.2345	4.263	20.6331	18.4307	8.0446	14.2105	16.0073	29.5651	19.1377	33.1952	11.6499	15.6467	0	0	0	0	0	0.4709	0	0	0	0
Negative	1.4294	571.149	1.4294_571.1487	0	0	0	0	0	0	0	0	0.4031	0	0	1.736	3.0949	0	5.0973	3.6963	8.5569	2.4033	5.6893	2.5345	5.0304	9.1848	2.6215	5.3884	6.2344	15.0394	6.9706	12.2776	4.6885	7.9031	0	0	0	0	0	0	0	0	0	0
Negative	3.139	571.171	3.139_571.1712	0	0	0	0	0	0.6434	0.9825	0	0	0	0	0	0	0	0	0	1.7716	1.7985	1.3703	0.9435	0	0	0	0	0	0.6226	1.4106	1.5905	1.7145	1.2019	0	0	0	0	0	1.3061	1.2716	1.72	2.0762	1.5972
Negative	3.6985	571.252	3.6985_571.252	0	0	0	0	0	0	0	0	0	0	0	0	0	0	0	0	0	0	0	0	0	0	0	0	0	0	1.7084	1.8506	1.6687	0	0	0	0	0	0	0	0	1.093	1.086	1.3013
Negative	5.8436	571.311	5.8436_571.3105	0	0	0	0	0	0.747	0	0	0	0.631	0	0	0	0	0	0	2.4396	1.205	3.5816	1.3777	0	0	0	0	0	0	0	0	0	0	0	0	0	0	0	0	0	0.7015	1.4547	0
Negative	4.7103	571.969	4.7103_571.9692	0	0	0	0.1808	0	0.8615	0.8809	0.4367	0.9097	0.5192	0	0	0	0	0	0	0.6874	0.363	0.2296	0.1199	0	0	0	0	0	0.4469	0.4124	0	0	0	0	0	0	0	0	2.1449	2.3035	3.5269	2.3568	0.8452
Negative	3.1961	572.122	3.1961_572.122	1.9457	1.4103	1.5064	2.3277	1.6989	0	0	0	0	0	3.5912	2.6311	3.4758	4.3235	0	0	0	0	0	0	3.8893	2.5966	3.4013	2.979	3.9378	0	0	0	0	0	2.133	1.8779	3.3379	2.596	3.4956	0	0	0	0	0
Negative	3.1802	573.128	3.1802_573.1275	7.8679	4.9606	4.5635	7.0181	7.7376	2.7988	4.2843	3.6535	3.8207	2.5713	11.8037	10.9956	9.8211	14.5338	11.4536	3.6051	4.4804	4.8435	4.0798	2.5093	12.2161	9.9918	7.4545	9.9467	11.9766	1.9116	3.0675	2.9435	4.5714	3.118	9.7858	8.3327	11.2058	11.7134	9.1377	6.4521	6.0265	6.9321	7.0069	4.432
Negative	3.4378	573.128	3.4378_573.128	0	0	0	0	0	0	0	0	0	0	0	0	0	0	0	2.2537	0	3.1008	0	0	0	0	0	0	0	0	0	0	0	0	0	0	0	0	0	0	1.5251	0	0	0
Negative	3.0075	573.129	3.0075_573.1288	0	0	0	0	0	0	1.5294	0	0	0	0	0	0	0	0	0	2.1528	1.8408	1.5322	1.3682	0	0	0	0	0	0	1.6243	1.5479	2.2375	0	0	0	0	0	0	2.745	3.0408	3.0463	3.7746	2.7281
Negative	3.9385	573.257	3.9385_573.2569	0	0	0	0	0	0	0	0	0	0.5358	0	0	0	0	0	3.4324	1.9885	1.5548	2.5911	2.4641	0	0	0	0	0	0	0	0.8915	0	0	0	0	0	0	0	0	0.9466	0	0	0
Negative	5.7106	573.961	5.7106_573.9613	0	0	0	0	0	5.9956	6.0277	3.7796	3.0707	0	0	0	0	0	0	0	0	0	0.1972	0	0	0	0	0	0	0.73	0	0	0	0	0	0	0	0	0	0	0	0	1.5443	0
Negative	4.7138	573.97	4.7138_573.9698	0	0	0	0	0	0.8559	1.164	0.4329	1.0668	0.4342	0	0	0	0	0	0.2282	0.7828	0.4066	0.2264	0	0	0	0	0	0	0.3698	0.5188	0	0	0	0	0	0	0	0	2.1048	2.1449	3.3326	2.6966	0.7881
Negative	3.4377	575.14	3.4377_575.1405	0	1.1906	0	0	0	2.4997	2.4639	2.5569	1.9377	1.9354	0	0	0	0	0	0	0	0	0	1.2936	0	0	0	0	0	0	0	0	0	0	0	0	0	0	0	0	1.2441	0	1.9052	1.4768
Negative	3.7051	575.14	3.7051_575.14	19.5696	15.124	14.952	26.7809	17.5565	7.7584	5.7569	6.2011	10.0401	4.9475	5.3434	6.9368	5.8814	5.4267	4.1266	0	0	0	0	0	9.7302	8.1045	6.5517	8.256	7.3124	0	0	3.5595	0	0	5.1285	4.731	4.7778	5.413	4.604	3.3122	0	5.0869	0	4.3628
Negative	3.6194	575.142	3.6194_575.142	0	0	0	0	0	3.8115	5.7569	6.2011	10.0682	4.9475	0	0	0	0	0	0	0	1.8631	1.6597	1.6035	0	0	0	0	0	2.5073	3.7297	2.1439	2.6968	1.3272	0	0	0	0	0	3.3122	3.8391	5.0869	4.8883	1.9613
Negative	4.2066	91.0025	4.2066_91.0025	0	0	0	0	0	0	3.7193	0	0	0	0	0	0	0	0	0	5.4292	0	0	0	0	0	0	0	0	0	0	0	1.7838	0	0	0	0	0	0	0	18.921	0	0	0
Negative	1.7336	91.0025	1.7336_91.0025	0	0	0	0	0	6.1692	0	0	0	0	0	0	0	0	0	0	8.8756	0	0	0	0	0	0	0	0	7.5291	0	5.6671	0	0	0	0	0	0	0	0	0	0	0	0
Negative	1.4738	91.0026	1.4738_91.0026	0	0	0	0	0	0	7.8931	0	0	0	0	0	0	0	0	2.9981	12.5967	0	0	0	0	0	0	0	0	3.2686	0	0	1.6039	0	0	0	0	0	0	0	0	0	0	0
Negative	2.3398	91.0027	2.3398_91.0027	0	0	0	0	0	4.0468	0	0	0	0	0	0	0	0	0	0	0	0	0	0.0694	0	0	0	0	0	0	0	0	0	0	0	0	0	0	0	0	9.6337	0	0	0
Negative	2.1314	91.0028	2.1314_91.0028	0	0	0	0	0	7.5176	0	2.7721	0	0	0	0	0	0	0	0	0	0	0	0	0	0	0	0	0	0	0	0	0	0	0	0	0	0	0	0	0	0	0	0
Negative	7.5211	91.0029	7.5211_91.0029	0	0	0	0	0	2.1924	0	0	0	0	0	0	0	0	0	3.1527	0	0	0	0	0	0	0	0	0	0	0	2.7181	0	0	0	0	0	0	0	0	4.8498	0	0	0
Negative	6.4212	91.0029	6.4212_91.0029	0	0	0	0	0	0	0	0	0	0	0	0	0	0	0	4.7158	5.1975	2.2349	0	0	0	0	0	0	0	1.1897	0	2.9304	0	0	0	0	0	0	0	0	0	0	0	0
Negative	6.8348	91.0029	6.8348_91.0029	0	0	0	0	0	0	0	4.3978	0	0	0	0	0	0	0	0	0	0	0	0	0	0	0	0	0	0	0	0	0	0	0	0	0	0	0	0	0	2.3875	0	0
Negative	5.7874	91.0029	5.7874_91.0029	0	0	0	0	0	2.0597	5.7169	0	0	0	0	0	0	0	0	0	0	0	0	0	0	0	0	0	0	0	0	2.4383	0	0	0	0	0	0	0	5.5327	0	3.2871	0	0
Negative	1.9844	91.0029	1.9844_91.0029	0	0	0	0	0	11.8666	0	4.595	0	0	0	0	0	0	0	0	0	0	0	0.0935	0	0	0	0	0	7.4978	5.3801	7.814	0	0	0	0	0	0	0	0	0	0	0	0
Negative	4.6537	91.003	4.6537_91.003	0	0	0	0	0	0	0	0	0	0	0	0	0	0	0	6.7376	15.9968	7.3113	0	0	0	0	0	0	0	4.4724	0	0	0	0	0	0	0	0	0	11.6054	0	4.7706	0	0
Negative	4.7752	91.003	4.7752_91.003	0	0	0	0	0	0	0	7.3875	0	0	0	0	0	0	0	5.9957	15.3144	0	0	0	0	0	0	0	0	6.7661	0	0	0	0	0	0	0	0	0	0	12.1307	2.5737	0	0
Negative	5.0394	91.003	5.0394_91.003	0	0	0	0	0	4.7186	0	2.2555	0	0	0	0	0	0	0	0	8.5369	8.4559	0	0	0	0	0	0	0	0	0	0	0	0	0	0	0	0	0	0	0	0	0	0
Negative	6.3337	91.0031	6.3337_91.0031	0	0	0	0	0	0	0	0	0	0	0	0	0	0	0	0	0	3.0053	0	0	0	0	0	0	0	2.1166	0	0	0	0	0	0	0	0	0	0	0	0	0	0
Negative	1.5945	91.0031	1.5945_91.0031	0	0	0	0	0	0	9.5031	4.4729	0	0	0	0	0	0	0	5.7318	9.1425	0	0.1873	0	0	0	0	0	0	6.6698	0	5.4419	0	0	0	0	0	0	0	0	0	0	0	0
Negative	6.6818	91.0031	6.6818_91.0031	0	0	0	0	0	0	0	4.5993	0	0	0	0	0	0	0	5.7119	0	4.0364	0	0	0	0	0	0	0	0	5.5144	0	0.4682	0	0	0	0	0	0	0	0	0	0	0
Negative	3.3164	575.144	3.3164_575.1443	0	1.687	0	0	0	2.0751	2.751	2.7077	2.7634	1.6981	0	0	0	0	0	0	0	1.5997	1.6319	0.8424	0	0	0	0	0	0	0	1.0954	0	0	0	0	0	0	0	0	0.9785	1.642	1.1734	0.9745
Negative	2.8624	575.167	2.8624_575.1669	4.6094	4.7353	3.2336	5.0507	6.2361	0	0	2.7433	3.6185	0	0	3.0667	1.8544	1.4898	3.2779	0	0	0	0	0	2.4309	3.6157	0	1.7637	2.3454	0	0	0	0	0	0	1.8299	0	0	1.542	0	0	0	0	0
Negative	2.2771	575.162	2.2771_575.1615	0	0	0	0	0	0	0	0	0	0	0	0	0	0	2.6173	0	0	0	0	0	0	4.0939	0	3.4602	0	0	0	0	0	0	3.167	0	0	0	0	0	3.961	0	3.0492	2.3616
Negative	2.1818	575.164	2.1818_575.1638	0	0	0	0	0	0	0	0	0	0	0	0	0	0	0	0	0	0	0	0	0	0	0	0	0	0.3216	1.5972	1.0573	1.2147	0	0	0	0	0	0	0	2.9924	0	1.8504	0
Negative	2.8677	575.183	2.8677_575.1831	0	4.7353	3.2336	5.0507	6.2361	2.2858	0	0	3.6185	3.3121	1.8525	3.0667	5.1241	1.7176	3.2779	0	0	0	0	0	3.6287	3.6157	1.3215	1.7637	2.3454	0	0	0	0	0	1.1231	1.8299	0.5529	0	1.542	0	0	0	0	0
Negative	2.8874	575.212	2.8874_575.2117	2.2759	4.6202	2.4374	1.8974	4.1936	0	0	0	0	0	2.5592	0	5.1241	1.7176	2.9821	0	0	0	0	0	3.6287	0	0	0	3.4558	0	0	0	0	0	0	0	0	0.8772	0	0	0	0	0	0
Negative	2.8424	575.264	2.8424_575.2639	0	0	0	0	0	0	0	0	0	0	0	0	0	0	0	0	0	0	0	2.7263	4.1374	3.1395	0	0	0	4.1191	6.884	4.8526	7.3371	4.1317	0	0	0	0	0	2.403	2.7924	0	0	1.6807
Negative	2.7374	575.264	2.7374_575.264	0	0	0	0	0	0	0	0	0	0	0	0	0	0	0	0	0	0	0	0	0	0	0	0	0	0.842	2.35	2.2339	2.7411	1.6046	0	0	0	0	0	0	0.9031	0	0	0
Negative	3.9153	575.268	3.9153_575.2675	2.3187	1.1542	0.5636	1.7072	2.201	0	0	0	0	0	3.4857	4.0888	0	2.1408	6.6015	0	0	0	0	0	0	0	0	0	0	0	0	0	0	0	0	0	0	0	0	0	0	0	0	0
Negative	3.1055	575.269	3.1055_575.2686	0	0	0	0	0	0	0	0	0	0	0	3.0122	0	0	0	0	0	0	0	0	4.2444	0	0	3.4974	0	0	0	0	0	0	4.3589	3.7567	0	1.3846	0	0	0.5739	0	0	0
Negative	2.9953	575.269	2.9953_575.2689	1.8911	2.5112	0.9693	1.5871	2.8907	0	0	0	1.8429	0	2.1785	3.0122	3.9941	3.7508	4.2277	3.3795	0	0	0	3.1843	6.8123	3.3941	8.1851	4.974	4.8414	3.7598	9.0928	8.4474	10.5216	3.938	4.3589	3.7567	4.0627	1.5797	0	6.8308	6.2583	0	4.637	2.151
Negative	3.7724	575.27	3.7724_575.2699	12.6451	6.3766	3.0687	8.9903	12.3828	14.1829	13.1671	12.7889	16.2935	5.3261	17.7761	24.7617	23.0449	15.5638	33.6169	34.7024	42.1103	34.7883	34.83	31.6835	9.7323	7.3324	0	6.316	4.6468	7.2197	11.4771	9.9468	6.7798	7.1647	0	0	0	0	0	2.7288	0	2.5513	2.6178	2.9695
Negative	3.6799	575.27	3.6799_575.2702	0	0	0	0	0	5.6374	5.4168	3.8902	5.5339	2.2951	0	0	0	0	0	0	13.4967	12.8441	11.7909	10.7178	0	0	0	0	0	2.6299	3.1891	3.7428	2.5615	2.2608	0	0	0	0	0	0	0	0	0	0
Negative	4.2639	575.277	4.2639_575.2771	0	0	0	0	0	0	0	0	0	0	0	0	0	0	0	3.2249	0	2.8409	0	0	0	0	0	0	0	0	0	0	0	0	0	0	0	0	0	0	0	0	0	0
Negative	7.3988	575.306	7.3988_575.3062	0	0	0	0	0	2.4511	3.1202	2.6537	0.921	0	0.3837	0	0	0	0	0	0.9851	1.3869	10.4593	6.4555	0	0	0	0	0	1.3225	1.4743	2.4972	1.1966	3.0306	0	0	0	0	0	0	0.7917	1.8646	1.4123	1.4695
Negative	7.9048	575.307	7.9048_575.3072	0	0	0	0	0	1.5951	1.4189	0	1.0784	2.1963	0	0	0	0	0	0	1.3897	1.8092	5.4071	0	0	0	0	0	0	0	0	1.1098	0	0	0	0	0	0	0	1.134	1.1342	2.9473	1.754	1.9013
Negative	2.4612	91.0032	2.4612_91.0032	0	0	0	0	0	3.7375	0	4.862	0	0	0	0	0	0	0	0	0	0	0.3949	0.2333	0	0	0	0	0	0	0	0	0.9026	0	0	0	0	0	0	0	9.3354	0	0	0
Negative	6.0926	91.0033	6.0926_91.0033	0	0	0	0	0	2.6123	0	0	0	0	0	0	0	0	0	2.6202	7.4001	0	0	0	0	0	0	0	0	2.0087	0	0	0	0	0	0	0	0	0	8.582	8.6966	3.0827	0	0
Negative	4.5583	91.0033	4.5583_91.0033	0	0	0	0	0	0	0	0	0	0	0	0	0	0	0	0	8.1079	5.1703	0	0	0	0	0	0	0	1.7074	5.012	0	0	0	0	0	0	0	0	0	0	0	0	0
Negative	5.414	91.0034	5.414_91.0034	0	0	0	0	0	3.8126	0	0	0	0	0	0	0	0	0	0	3.5185	2.689	0	0	0	0	0	0	0	0	0	0	0.7746	0	0	0	0	0	0	0	0	0	0	0
Negative	2.7886	91.0034	2.7886_91.0034	0	0	0	0	0	2.4246	0	0	0	0	0	0	0	0	0	0	0	0	0.4572	0.5417	0	0	0	0	0	0	0	0	0	0	0	0	0	0	0	0	0	2.4532	0	0
Negative	3.9142	91.0035	3.9142_91.0035	0	0	0	0	0	6.0248	0	0	0	0	0	0	0	0	0	0	8.4613	0	0	0	0	0	0	0	0	3.88	0	4.1167	0	0	0	0	0	0	0	0	0	2.7239	0	0
Negative	1.1752	91.0035	1.1752_91.0035	0	0	0	0	0	2.757	0	0	0	0	0	0	0	0	0	2.7117	0	0	0	0	0	0	0	0	0	0	5.3205	3.6955	2.1276	0	0	0	0	0	0	0	9.891	0	0	0
Negative	7.3677	91.0036	7.3677_91.0036	0	0	0	0	0	0	5.429	3.084	0	0	0	0	0	0	0	1.4566	0	0	0	0	0	0	0	0	0	2.7705	0	2.1092	0.3723	0	0	0	0	0	0	0	0	0	0	0
Negative	4.9402	91.0036	4.9402_91.0036	0	0	0	0	0	0	0	11.1337	0	0	0	0	0	0	0	7.2239	0	7.1976	0	0	0	0	0	0	0	1.8723	0	9.0348	0	0	0	0	0	0	0	0	0	0	0	0
Negative	4.0509	91.0036	4.0509_91.0036	0	0	0	0	0	3.6476	0	0	0	0	0	0	0	0	0	0	8.9937	0	0	0	0	0	0	0	0	7.879	0	4.0447	0	0	0	0	0	0	0	0	0	2.9037	0	0
Negative	8.135	91.0036	8.135_91.0036	0	0	0	0	0	1.9265	0	0	0	0	0	0	0	0	0	0	0	1.8613	0	0	0	0	0	0	0	0	1.673	0	0	0	0	0	0	0	0	0	0	0	0	0
Negative	1.8592	91.0037	1.8592_91.0037	0	0	0	0	0	7.7648	0	4.5253	0	0	0	0	0	0	0	0	0	0	0	0	0	0	0	0	0	6.3998	0	7.4335	0	0	0	0	0	0	0	0	0	0	0	0
Negative	3.3338	91.0037	3.3338_91.0037	0	0	0	0	0	0	8.2011	7.3227	0	0	0	0	0	0	0	8.2881	0	0	0	0	0	0	0	0	0	0	6.2814	0	0	0	0	0	0	0	0	0	0	4.6532	0.4122	0
Negative	7.7475	91.0037	7.7475_91.0037	0	0	0	0	0	0	0	0	0	0	0	0	0	0	0	1.9524	3.4815	0.6359	0	0	0	0	0	0	0	0	2.1139	0	0	0	0	0	0	0	0	0	0	0	0	0
Negative	3.6371	91.0038	3.6371_91.0038	0	0	0	0	0	0	0	5.762	0	0	0	0	0	0	0	6.7769	0	0	0	0	0	0	0	0	0	5.483	0	0	0	0	0	0	0	0	0	5.5388	0	2.9759	0	0
Negative	5.9417	91.0038	5.9417_91.0038	0	0	0	0	0	3.8401	0	0	0	0	0	0	0	0	0	3.5774	0	0	0	0	0	0	0	0	0	0	0	0	0	0	0	0	0	0	0	6.6654	0	4.5797	0.2759	0
Negative	2.2471	577.12	2.2471_577.1203	0	0	0	0	0	0.7948	0	0	0	0	0	0	0	0	0	0.5874	0	2.3932	0	2.834	0	0	0	0	0	1.4214	1.4753	1.0827	1.6969	0.8835	0	0	0	0	0	0	0	0	0	0
Negative	2.6216	577.117	2.6216_577.117	3.1102	2.9685	0	0	3.4229	0	0	0	0	0	0	0	0	0	0	0	0	0	0	0	0	0	0	0	0	0	0	0	0	0	2.215	2.6169	3.0865	2.0026	2.0979	0	0	0	0	0
Negative	2.3909	577.12	2.3909_577.1195	4.3649	3.194	1.6862	4.9167	4.3265	2.9303	2.9485	2.3541	2.9418	2.2057	4.5452	6.7193	5.1538	6.2664	9.9637	2.8311	3.0777	7.9242	4.4495	8.5451	16.4431	17.5388	11.9298	17.0613	21.3631	4.2784	4.8045	4.6418	6.8364	5.6012	1.4129	2.4918	2.124	1.9003	3.3798	0.8383	2.0835	2.4332	0	0
Negative	3.0064	577.155	3.0064_577.1553	103.885	110.459	101.761	97.5215	92.5333	35.8344	36.0881	31.7258	41.0287	36.5935	26.7619	23.906	24.9843	23.5799	21.0512	7.4011	15.3179	3.1513	11.0243	0	51.1972	49.8977	36.6545	40.858	48.5412	8.9715	11.638	9.7452	11.043	13.6071	287.033	277.242	265.514	332.02	211.644	200.997	158.542	178.145	165.948	72.6216
Negative	2.7912	577.155	2.7912_577.1553	0	0	0	0	0	10.5915	6.5285	6.8281	11.8659	12.0951	0	0	0	0	0	1.302	4.0521	1.6929	2.3675	1.5374	0	0	0	0	0	2.454	3.5925	2.8458	3.476	4.2352	0	0	0	0	0	49.035	47.3745	56.6023	52.3855	48.3364
Negative	2.6771	577.155	2.6771_577.1555	0	0	0	0	0	0	3.6301	2.6585	5.248	0	0	0	0	0	0	0	0	0	1.6241	0	0	0	0	0	0	0	0	0	0	2.5307	0	0	0	0	0	31.6531	31.7025	0	29.9515	25.3118
Negative	3.1083	577.156	3.1083_577.1557	0	0	0	0	0	0	0	0.4001	0	0	0	0	0	0	0	0	0	0	0	0	0	0	0	0	0	0	0	0	0	0	3.2304	0	2.9846	3.4472	0	0	0	0	0	0
Negative	3.501	577.159	3.501_577.1585	0	0	0	0	0	3.9642	6.2411	0	0	3.5735	0	5.8171	5.7304	5.7447	0	2.488	6.564	0	0	0	0	0	0	0	0	0	0	0	0	0	0	0	0	0	0	0	0	0	0	0
Negative	3.4872	577.191	3.4872_577.1905	0	0	0	0	0	0	1.5093	0	1.5632	0	0	0	0	0	0	2.488	2.1062	0	0	2.0036	0	0	0	0	0	0	1.1637	0	0	0	0	0	0	0	0	0	0	0	0	0
Negative	3.6074	577.191	3.6074_577.191	0	0	0	0	0.6116	0	0	0	0	0	5.9223	8.8692	6.49	6.9459	5.3888	2.1526	3.4367	2.4504	2.6499	1.8946	0	0	0	0	0	0	0	0	0	0	0	0	0	1.0438	0	0	0	0	0	0
Negative	4.6089	577.316	4.6089_577.3164	0	0	0	0	0	0	0	0	0.9624	0.8599	0	0	0	0	0	0	0	2.8578	0	0	0	0	0	0	0	2.7526	0	0	2.839	5.2147	0	0	0	0	0	0	1.4571	0	2.881	2.4111
Negative	4.3495	577.32	4.3495_577.3203	0	0	0	0	0	0.896	0	0	0.6918	1.1352	0	0	0	0	0	0	0	0	0	0	0	0	0	0	0	1.0201	0	1.151	1.9361	3.2822	0	0	0	0	0	0	0	0.8311	0	0
Negative	4.1358	577.321	4.1358_577.3205	0	0	1.4995	2.5986	0	4.0018	3.736	4.7869	3.7139	3.2346	0	4.1835	2.5373	3.506	3.7363	6.1696	4.9276	7.2808	4.6405	2.1322	2.5167	3.1838	1.1674	3.0623	3.2919	3.6018	0	1.9798	6.3672	0	0	0	1.7138	1.5935	1.8834	0	3.915	3.3036	1.8403	0
Negative	4.0113	577.321	4.0113_577.3206	0	0	0	0	0	5.7487	5.2777	6.9773	5.0183	4.2267	4.0286	3.5304	0	0	3.7799	9.6233	7.5099	6.9138	6.1007	7.498	0	0	0	0	0	3.2561	4.7265	4.9268	5.0622	0	0	0	0	0	0	2.6688	3.5449	3.3972	4.6631	4.6187
Negative	7.0695	578.306	7.0695_578.3064	0	0	0	0	0	0.4345	0.5347	0.8802	0	0	0	0	0	0	0	4.8545	1.6546	1.5071	6.8041	3.6321	0	0	0	0	0	2.2335	2.05	2.9233	0.356	3.1261	0	0	0	0	0	0	0	0.4842	0	0
Negative	6.8756	578.307	6.8756_578.3065	0	0	0	0	0	0	0	0	0	0	0	0	0	0	0	4.3285	0	0.8753	4.0403	1.5569	0	0	0	0	0	4.1446	1.4224	3.5367	0	6.0747	0	0	0	0	0	0	0	0	0	0
Negative	6.2428	91.0039	6.2428_91.0039	0	0	0	0	0	1.8408	0	0	0	0	0	0	0	0	0	7.024	0	3.0053	0	0	0	0	0	0	0	0	0	0	0	0	0	0	0	0	0	0	0	0	0	0
Negative	3.2018	91.0039	3.2018_91.0039	0	0	0	0	0	0	0	8.7845	0	0	0	0	0	0	0	9.7045	0	0	0	0	0	0	0	0	0	0	7.9156	0	0.5378	0	0	0	0	0	0	0	0	4.6057	0.5585	0
Negative	0.4594	91.004	0.4594_91.004	0	0	0	0	0	0	0	2.1043	0	0	0	0	0	0	0	1.089	0	2.4499	0.7567	0	0	0	0	0	0	0	0	4.3031	0.5063	0	0	0	0	0	0	0	0	0	0	0
Negative	0.7504	91.004	0.7504_91.004	0	0	0	0	0	0	0	0	0	0	0	0	0	0	0	0.806	0	0	0	0	0	0	0	0	0	1.6565	4.27	3.5228	0	0	0	0	0	0	0	0	5.5563	0	0	0
Negative	3.5063	91.004	3.5063_91.004	0	0	0	0	0	0	0	4.6772	0	0	0	0	0	0	0	7.799	0	0	0.3228	0	0	0	0	0	0	0	0	0	0.3966	0	0	0	0	0	0	0	0	3.1634	0	0
Negative	6.5358	91.0041	6.5358_91.0041	0	0	0	0	0	0	0	4.6175	0	0	0	0	0	0	0	2.1315	0	3.0285	0	0	0	0	0	0	0	3.0389	0	0	0.488	0	0	0	0	0	0	0	3.4244	0	0	0
Negative	1.002	91.0042	1.002_91.0042	0	0	0	0	0	0	0	0	0	0	0	0	0	0	0	3.1233	0	2.0709	0	0	0	0	0	0	0	0	7.6534	4.1412	2.2368	0	0	0	0	0	0	0	11.7806	0	0	0
Negative	7.8002	91.0042	7.8002_91.0042	0	0	0	0	0	0	3.5801	0	0	0	0	0	0	0	0	1.6586	0	0	0	0	0	0	0	0	0	0	0	0	0.4277	0	0	0	0	0	0	0	5.1748	0	0	0
Negative	4.4562	91.0042	4.4562_91.0042	0	0	0	0	0	0	0	0	0	0	0	0	0	0	0	0	8.7517	3.7946	0	0	0	0	0	0	0	0	0	0	0	0	0	0	0	0	0	0	0	5.8835	0	0
Negative	3.7695	91.0042	3.7695_91.0042	0	0	0	0	0	0	0	0	0	0	0	0	0	0	0	0	0	6.0203	0	0	0	0	0	0	0	0	0	0	0	0	0	0	0	0	0	0	0	2.1025	0	0
Negative	0.6809	91.0042	0.6809_91.0042	0	0	0	0	0	1.8506	0	0	0	0	0	0	0	0	0	0.9964	0	0	0	0	0	0	0	0	0	1.4825	0	1.6449	0	0	0	0	0	0	0	0	5.5563	0	0	0
Negative	3.4385	91.0044	3.4385_91.0044	0	0	0	0	0	0	0	7.0842	0	0	0	0	0	0	0	7.799	0	0	0	0	0	0	0	0	0	0	0	7.3033	0	0	0	0	0	0	0	0	0	2.7674	0.649	0
Negative	5.3129	91.0044	5.3129_91.0044	0	0	0	0	0	3.1329	0	0	0	0	0	0	0	0	0	0	3.0012	4.835	0	0	0	0	0	0	0	0	6.5352	0	0	0	0	0	0	0	0	0	0	2.2479	0	0
Negative	4.3253	91.0046	4.3253_91.0046	0	0	0	0	0	0	0	0	0	0	0	0	0	0	0	0	0	0	0	0	0	0	0	0	0	0	0	0	0	0	0	0	0	0	0	8.0204	0	3.1361	0.4569	0
Negative	0.875	91.0048	0.875_91.0048	0	0	0	0	0	0	0	0	0	0	0	0	0	0	0	1.669	0	2.3703	0	0	0	0	0	0	0	2.0835	0	3.4187	1.5002	0	0	0	0	0	0	8.2232	7.1593	0	0	0
Negative	1.3459	91.005	1.3459_91.005	0	0	0	0	0	0	0	3.6934	0	0	0	0	0	0	0	0	0	4.7836	0	0	0	0	0	0	0	0	0	3.2681	1.9748	0	0	0	0	0	0	8.3872	0	0	0	0
Negative	2.3866	579.133	2.3866_579.1327	126.287	107.074	79.075	111.081	106.849	45.0198	44.0266	38.4036	54.8684	33.5797	136.925	169.318	115.033	119.735	156.864	44.2517	58.9271	78.0757	65.0963	100.054	247.538	292.709	182.707	250.611	332.26	66.185	119.56	106.625	121.477	75.0894	64.9365	89.2224	66.7995	65.6241	96.9842	35.988	37.6594	39.1219	30.7308	30.819
Negative	2.6065	579.133	2.6065_579.1334	77.9475	93.4659	33.9429	59.3318	72.969	1.9236	0	0	0	0.2879	8.685	39.5593	32.7697	7.3039	10.785	0	0	1.9106	0	0	12.7023	13.8225	13.3169	8.6489	20.3719	0.3822	0	0	0	0	60.194	81.5375	74.2014	73.3441	38.6153	9.7424	6.3815	4.6735	3.7815	1.7126
Negative	2.2531	579.134	2.2531_579.1337	0	0	0	0	0	11.81	7.8996	8.4127	9.4041	7.4616	0	0	0	0	0	12.7096	0	34.0716	14.0324	83.5079	0	0	6.7123	0	0.5713	0	48.2831	42.2473	0	0	0	0	0	0	0	0	4.645	0	3.5911	3.3061
Negative	2.1612	579.134	2.1612_579.1337	0	0	0	0	0	9.6055	5.087	5.0529	5.5264	3.1168	0	0	0	0	0	5.183	6.047	26.0644	6.3907	26.5193	0	8.9786	0	0	0	15.0367	29.5865	28.371	27.0038	13.6445	0	0	0	0	0	0	2.3231	0	0	1.9599
Negative	1.9775	579.135	1.9775_579.135	0	0	0	0	0	3.1448	2.1032	1.9263	0	0.9239	0	0	0	0	0	0	3.6706	0	3.0452	12.0404	0	0	0	0	0	5.8624	10.4959	10.9596	11.0856	3.9715	0	0	0	0	0	0	0	0	0	0.4478
Negative	2.0611	579.135	2.0611_579.1353	0	0	0	0	0	5.9919	3.8212	3.5153	4.5698	2.6017	0	0	0	0	0	4.0981	6.047	21.7111	2.9763	22.0649	0	0	0	0	0	6.9888	23.3631	10.2395	11.2363	3.9715	0	0	0	0	0	0	0	0.851	0.6155	1.6958
Negative	0.5121	579.136	0.5121_579.1358	0.3284	0.292	0.3336	0.138	0	1.7371	1.9849	1.7149	2.0928	1.1779	0.4277	0	0	0	0	1.1654	2.552	8.6284	1.5953	8.6373	0	0.4679	0	0	0	3.9315	0	13.2311	12.0479	5.2981	0	0	0	0.5478	0.6234	1.2661	0.8027	0.9644	0.9028	0.45
Negative	3.2062	579.174	3.2062_579.1736	0	0	0	0	0	0	0	0	0	0	0	0	0	0	0	0	0	0	0	0	0	0	0	0	0	113.106	0	0	0	75.8116	0	0	0	0	0	0	0	0	0	0
Negative	3.0086	579.174	3.0086_579.174	0	0	0	0	0	0	0	0	0	0	0	0	0	0	0	0	0	0	0	0	0	0	0	3.3041	0	16.1171	0	0	0	10.5693	0	0	0	0	0	0	0	0	0	0
Negative	3.6204	579.207	3.6204_579.2066	0	0	0	0	0	2.2352	0.7448	1.1208	3.7269	1.8272	0	0.7583	0	0	0	0.9048	2.4354	1.2783	3.1836	1.7203	0	0	0	0	0	0.4954	1.9836	1.8646	1.7213	0.5901	0	0	0	0	0	2.9163	1.1281	3.1079	4.5084	3.2549
Negative	3.2868	579.269	3.2868_579.2693	0	0	0	0	0	1.5462	0.8307	0	0.6891	1.0439	0	0	0	0	0	0.7025	0	2.1017	1.5848	1.6585	0	0	0	0	0	0	0.3765	0.4871	0	0.2732	0	0	0	0	0	0	0	0.4994	0	1.7041
Negative	3.7208	579.337	3.7208_579.3369	0	0	0	0	0	2.3115	2.0615	0	2.3636	1.4584	0	0	0	0	0	4.2898	3.0943	3.213	3.0176	2.9723	0	0	0	0	0	3.2731	1.7038	3.4326	2.6447	2.4538	0	0	0	0	0	2.1178	2.5584	2.855	3.2444	4.2633
Negative	3.9114	579.338	3.9114_579.3379	0	0	0	0	0	6.7816	9.3735	5.4504	5.9052	4.6798	0	7.6078	0	0	3.5336	10.7417	4.9475	4.9737	3.403	4.3701	0	0	0	0	0	4.8776	7.3148	10.2561	12.242	9.0094	0	0	0	0	1.5508	0	3.2023	0	3.5354	3.2919
Negative	4.1129	580.056	4.1129_580.0559	0	0	0	0	0	1.2722	1.0756	0	1.0681	0	0	0	0	0	0	0	0	0.6804	0	0	0	0	0	0	0	0	0	0.1332	0.3467	0	3.2934	2.7486	0	0	0	2.8937	2.5407	1.9491	0	0.6983
Negative	7.5129	581.168	7.5129_581.1682	0	0	0	0.7176	0	2.1175	0	2.9126	2.7529	0	0	0	0	0.1836	0	0.2654	0	0	1.9016	2.3587	0	0.2548	0	0	0	0	9.129	0	0	2.34	0	0	0	0	0	0	0	0	0	4.2474
Negative	8.7273	581.182	8.7273_581.1817	0	0	0	0	0	0	0	0	0	4.3005	0	0	0	0	0	0	0	0	0	2.3594	0	0	0	0	0	0	0	0	0	2.2347	0	0	0	0	0	0	0	0	0	4.8086
Negative	0.4883	92.9309	0.4883_92.9309	0	0	0	0	0	0.9471	1.4678	1.8372	0.671	0.9278	0	0	0	0	0	2.2396	0.5768	0.7068	1.8157	0.5969	0	0	0	0	0	1.3413	2.8339	1.7654	1.4329	1.6183	0	0	0	0	0	0	0.6675	2.5678	0.997	2.955
Negative	0.4838	94.9288	0.4838_94.9288	0	0	0	0	0.0519	1.1864	2.2057	2.4297	0.5334	0.9645	0	0	0	0	0.22	2.9815	0.6685	1.0104	2.1542	1.0474	0	0	0	0	0	0.9791	2.0381	1.538	1.1087	1.404	0	0	0	0	0	0	0.5515	2.1502	0.8389	2.1295
Negative	3.644	96.96	3.644_96.96	0	0	0	0	0	0	0	0	0	0	0	0	0	0	0	4.1539	2.574	5.7548	2.0846	4.6111	0	0	0	0	0	0	0	0	0.1941	0	0	0	0	0	0	0	0	0	0	0
Negative	0.6195	96.96	0.6195_96.96	33.7996	18.284	22.4507	17.5683	49.3119	12.654	24.5571	19.1919	28.1613	17.5626	36.6228	79.3992	12.1556	6.4001	42.2149	22.0192	23.6144	19.0684	30.376	29.5097	63.9309	16.0851	16.3952	14.8311	19.1946	9.2466	35.8355	30.1803	40.0083	15.5727	42.9904	92.1243	122.406	67.3985	27.2646	65.5552	43.4507	39.5628	24.3884	24.0257
Negative	3.3734	96.9601	3.3734_96.9601	14.9325	19.121	9.6987	29.3836	27.0492	13.8232	3.4844	5.9867	8.8208	7.6035	0	0	0	0	0	0	0	0	0	0	0	0	0	0	0	0	0	0	1.7358	0	0	0	0	0	0	0.4026	0	0	0	0
Negative	2.935	96.9606	2.935_96.9606	0	2.6417	0	0	0	0	3.8083	3.3112	1.8671	0	0	3.7424	0	0	0	2.8847	2.9019	5.5375	0	3.1517	0	0	0	0	0	0	0	0	0.2885	0	0	0	0	0	0	0	0.5098	0	0	0
Negative	3.0961	96.9606	3.0961_96.9606	3.0645	3.659	3.778	3.9102	2.3085	7.91	5.881	5.9279	6.7008	6.2549	1.8833	0	0	1.4551	0	1.868	3.5185	0	1.8117	3.8061	0	0	0	0	0	1.4115	0	0	0	0	0	0	0	0	0	1.0934	0	0	0	0
Negative	0.7884	96.9608	0.7884_96.9608	14.1258	17.8023	15.2633	10.7026	15.3795	5.7624	8.0494	5.9789	9.6342	8.9507	22.3972	19.4189	7.0553	5.4532	12.1194	15.1188	7.1812	7.3202	8.9265	9.0769	25.7467	13.3192	11.8679	8.9455	13.277	4.0375	12.0271	7.49	14.1226	6.8598	26.2722	26.7391	37.5744	37.0544	15.9747	23.0893	13.7809	17.462	9.4221	6.9931
Negative	3.2252	96.961	3.2252_96.961	0	2.3855	0	2.882	0	0	3.0018	3.0081	2.6127	1.546	1.7037	0	0	2.3188	0	0	0	0	0	0	0	0	0	0	0	0	0	0	0	0	0	0	0	0	0	0	0	0	0	0
Negative	0.9335	96.9617	0.9335_96.9617	6.1613	5.3449	5.425	4.6766	3.4283	1.6494	3.3751	4.3968	3.4628	3.9317	6.4091	9.6022	3.3577	3.6384	6.6295	2.2646	5.0544	4.8999	4.2363	6.4353	12.9902	4.8529	4.8186	4.2287	4.7822	2.4549	4.4349	3.7445	5.8429	5.8282	7.7459	7.515	0	9.054	4.4344	12.5023	6.1678	8.1785	5.278	4.1475
Negative	1.0158	96.9618	1.0158_96.9618	0	0	0	0	0	1.1916	0	0	0	0	0	0	0	0	0	0	2.1638	2.463	0	2.9356	0	0	0	0	0	1.5836	0	0	0	3.1126	0	0	0	0	0	0	2.2417	3.7978	2.6288	1.9243
Negative	2.7976	96.962	2.7976_96.962	0	6.7226	8.6847	6.702	4.2928	0	0	8.2662	0	0	0	4.4245	0	5.3025	2.9968	0	1.9097	2.2732	0	3.1517	0	4.0373	0	3.5218	0	0	0	0	0	0	0	0	0	0	0	0	0	0	0	0
Negative	1.9314	96.9651	1.9314_96.9651	3.3806	0	0	0	0	0	0	0	0	0	2.5558	1.5715	0	0	0	0	0	0	0	0	2.7591	0	0	0	0	0	0	0	0	0	0	0	0	4.7372	0	0	0	0	0	0
Negative	0.4926	96.9684	0.4926_96.9684	0	5.7022	8.6366	0	0	1.6076	1.5356	1.6357	2.6642	1.702	9.341	0	0	0	0	0	3.0111	2.2736	2.5365	0	4.3697	0	10.4482	6.8583	5.8698	0	5.9711	4.7957	0	0	8.4588	6.2763	0	15.4893	11.4972	0	0.6544	4.1254	0	0
Negative	0.5218	99.0099	0.5218_99.0099	11.1662	12.0329	17.2459	9.2078	10.8813	7.7488	10.6809	8.106	9.3903	9.5136	9.3655	8.0627	12.8611	11.0563	10.7148	3.6102	9.1825	7.198	4.7177	4.2221	9.0309	7.7942	8.5915	9.2623	10.3219	4.9996	8.3727	8.8264	9.6774	5.8851	7.9763	8.443	4.9595	9.2985	9.096	4.7009	7.767	9.7434	8.4794	4.9608
Negative	1.7138	99.0445	1.7138_99.0445	0	0	0	0	0	0.4818	0	1.0286	0.8192	0	0	0	0	0	0	0	0	0	3.3118	2.0154	0	0	0	0	0	0	0	0	0	0	0	0	0	0	0	1.9729	1.5428	0	0	3.8295
Negative	8.6416	581.183	8.6416_581.1825	0	0.371	0	0	0.1039	0	0.0709	0	0	4.3005	0	0	0	0	0	0	0	0	0	0	0	0	0	0	0	0	0	0	0	0	0	0	0	0	0	0	0	0	0	5.6155
Negative	3.2067	581.189	3.2067_581.1886	0	0	0	0	0	2.1077	2.603	2.2625	2.6235	2.3847	3.5315	3.208	4.2315	6.6551	2.8147	1.9726	3.1595	0	1.9249	0	0	0	0	0	0	5.0654	0	0	0	6.6244	0	0	0	0	0	1.5975	0	0	0	0
Negative	7.4796	581.196	7.4796_581.1962	0	0	0	0.5393	0	2.284	0	2.9827	3.1004	0.487	0	0	0	0	0	0	0	0.3955	0.8928	1.2051	0	0	0	0	0	1.6551	8.0954	1.2065	1.4649	1.8916	0	0	0	0	0	0	0	1.2462	1.186	3.8998
Negative	3.4053	581.222	3.4053_581.2218	0	0	0	0	0	0	1.2998	2.1759	1.1541	0	0	4.4014	0	0	3.0445	0	3.6111	0	3.5653	0	0	0	0	0	0	0.3362	0	0	0	0	0	0	0	0	0	0	0	0	0	0
Negative	7.4941	581.234	7.4941_581.2343	0	0	0	0	0	0	1.4464	2.6575	3.1004	0.9802	0	0	0	0	0	0.3222	1.7299	0	0	0	0	0	0	0	0	0	0	1.2065	1.5272	1.7795	0	0	0	0	0	0	2.9608	1.2845	2.0988	3.5519
Negative	7.098	581.238	7.098_581.2384	0	0	0	0	0	0	1.4164	2.4532	3.037	0.8961	0	0	0	0	0	0	1.9062	0.5171	0.5673	0.6273	0	0	0	0	0	0	2.184	0	1.0952	1.1588	0	0	0	0	0	0	1.4937	0.8892	1.5783	2.7288
Negative	5.0371	581.317	5.0371_581.3165	0	0	0	0	0	0.3248	0	0	0.3642	0	0.3046	0	0.4214	0	0	0	0.5274	0	0	0	0	0	0	0	0	0.6422	2.161	1.7092	1.4706	0.7246	0	0	0	0	0	0.4219	0.6334	0.6687	1.2259	1.0455
Negative	3.7144	581.354	3.7144_581.354	0	0	0	0	0	1.7866	0	0	0	0	0	0	0	0	0	2.6815	0	0	0	1.6784	0	0	0	0	0	1.4222	0	0	0	0	0	0	0	0	0	1.3598	0	1.5338	1.8949	0
Negative	2.3441	583.206	2.3441_583.206	0.9216	1.0121	1.3779	1.3863	0.8538	0	0	0	0	0	0.8837	0	0.7717	1.0747	0.6193	0	0	0	0	0	1.2523	0.9898	1.8933	1.7732	0	0	0	0	0	0	3.445	3.7623	2.8677	4.3645	3.4265	0	0	0	0	0
Negative	4.6594	583.221	4.6594_583.2205	0	0	0	0	0	1.2661	1.2399	1.1148	1.1911	1.4143	0	0	0	0	0	0	0.3928	0	0.3537	0	0	0	0	0	0	1.4683	0	0	0.4714	3.1437	0	0	0	0	0	0	0.8871	3.62	2.329	0
Negative	3.4746	585.086	3.4746_585.0863	0	0	0	0	0	0	2.01	2.0949	0	0	0	2.731	0	0	0	0	0	0	0	0	0.4417	0	0	0	0	1.1024	0.7949	0.53	1.5511	1.2165	0	0	0	0	0	0	0	0	0	0
Negative	3.9074	585.087	3.9074_585.0872	0	0	0	0	0	0	1.5798	0	1.7544	1.4433	0	0	0	0	0	0	0	1.0508	0	0	0	0	0	0	0	0	0	0	0	0	0	0	0	0	0	0	0	0	0	2.3488
Negative	1.9055	585.233	1.9055_585.2327	0	0	0	0	0	1.0643	1.074	2.0318	0.6508	0.4527	0	0	0	0	0	5.4892	1.4303	1.8678	1.5062	2.1916	0	0	0	0	0	6.2562	2.426	1.5117	2.2531	2.8547	0	0	0	0	0	1.3333	1.2735	0.577	1.2052	2.5225
Negative	4.6119	585.289	4.6119_585.2891	0	0	0	0	0.2797	0	0	0	0	0	0	0	0	0	0	0	0	1.9494	1.8751	0	0	0	0	0	0	0	0	0	0	0	0	0	0	0	0	0	0	0	0	0
Negative	4.4444	585.291	4.4444_585.2906	0	0.327	0	0	0	0	0	0	0	0	0	0	0	0	0	0	2.3491	2.092	2.3846	2.0827	0	0	0	0	0	0	0	0.6194	0	0	0	0	0	0	0	0	0	0	0	0
Negative	2.7868	585.976	2.7868_585.9762	0	0	0	0	0	0	0	0	0	0	1.9184	0	1.7669	2.9485	0.7413	0	0	0	0	0	0.6692	0	0	0	0	0	0	0	0	0	2.4677	2.6162	3.7594	5.1674	4.6087	0	0	0	0	0
Negative	1.2962	99.0469	1.2962_99.0469	2.1427	2.1039	2.5791	4.5298	2.0274	1.4572	0	1.3362	1.5338	1.4336	1.3686	1.1945	0	1.1752	0.9778	0	0	0.6777	2.2765	1.2408	1.5505	1.4555	1.2378	1.4219	1.0368	0	0	0	0	0	2.4791	1.9917	0	2.5869	1.9776	3.7998	3.3941	0	2.377	2.5521
Negative	5.4146	100.934	5.4146_100.9337	1.4277	0	0	0	0	0	2.8382	2.1608	2.2848	0	0.9129	0	0	0	2.7473	0	0	0	0	0	0	0	0	0	0	0	1.3827	0	0	0	0	0	0	0	0	0	0	0	0	0
Negative	5.6985	100.934	5.6985_100.9345	0	1.6553	0.6828	0	0	1.5564	0	0	0	1.3575	1.8064	0	0	0	0	0	0	0	0	1.1089	0	0	0	0	0	0	0	0	1.66	0	0	0	0	0	0	0	0	0	0	1.7607
Negative	4.0949	101.023	4.0949_101.0227	3.7396	0	0	3.4174	3.4894	2.7497	0	0	2.3649	2.0727	5.8147	3.5541	4.7575	7.8581	4.8664	3.9877	3.5347	3.7667	2.6995	4.1779	4.6042	3.8409	3.8474	5.1349	5.7862	3.665	4.1556	4.0463	5.1688	3.2032	6.8353	5.6957	4.5089	5.6818	8.4422	4.7826	5.9762	0	4.2157	5.1882
Negative	4.2667	101.023	4.2667_101.0229	0	0	0	0	0	0	0	0	0	0	0.6678	0	0	0	0	0	0	0	0.7267	1.1523	0	0	0	0	0	0	0.1457	0.1129	0	0	1.5157	0	0.8307	0	0	2.1049	2.4866	1.8078	1.7938	2.3384
Negative	4.359	101.023	4.359_101.0235	0	0	1.2989	1.8132	0	0	0	0	0	0	3.9627	0	2.2817	4.4642	2.7179	0	0	0	0	0	0	0.5581	0	0	0	0	0	0	0	0	5.4162	4.6588	4.0718	4.4881	6.8616	3.4609	3.9576	4.1944	2.9293	2.7645
Negative	3.9761	101.024	3.9761_101.0237	0	0	1.0253	1.2318	0	2.9332	1.6988	1.8466	2.2589	2.1924	1.5418	0	1.0075	1.3446	0	2.339	1.5829	2.4338	1.5097	2.9668	0	1.5179	1.0753	1.8169	1.2714	3.3801	3.7328	4.5246	5.9322	2.8053	0	1.0515	0	0	0	2.4584	3.8419	3.014	3.9797	4.3492
Negative	3.0212	101.024	3.0212_101.0241	0	0	0	0	0	0.7368	2.7824	2.1269	0.7955	0	3.9821	5.088	0	3.7083	4.5797	4.3267	4.6674	3.5815	2.8943	2.0457	0	0	0	0	0	0	0	0	0.9235	0	0	0	0.5995	0	0	2.9682	2.243	2.1845	2.6879	0
Negative	3.8899	101.025	3.8899_101.0248	0	0	0	0	0	1.7603	0	1.0477	0	0.8366	0	0	0	0	0	0.5212	0	0	0	0	0	0	0	0	0	0	2.1754	2.099	0	0	0	0	0	0	0	0	0	0	0	2.1282
Negative	0.5509	101.026	0.5509_101.0257	2.9912	3.2186	3.1739	1.6891	1.778	0	2.0432	1.9858	3.2718	2.4373	1.8835	0	0	4.0543	1.2687	3.5592	2.4077	1.8523	2.0738	4.0425	0	0	2.3082	0	2.9803	1.2804	3.8418	2.2996	2.7757	1.6585	1.6621	2.2503	0	2.5082	1.8834	2.8752	2.9991	3.1524	2.311	4.5285
Negative	0.4854	101.026	0.4854_101.0257	2.9912	0	3.8405	2.4855	2.8682	3.344	0	0	4.0238	2.5617	2.5751	2.8479	0	4.0543	2.4367	3.5592	3.1087	0	2.3466	3.4745	2.5364	1.9795	2.6844	2.6137	2.1994	1.4867	0	2.783	0	1.5762	1.7247	2.3846	3.9326	2.4501	3.2052	5.1793	4.3666	0	3.6307	4.5285
Negative	0.6868	101.026	0.6868_101.0259	0	3.0829	3.7989	1.0102	1.3339	0.5243	2.0432	2.0027	2.4196	3.1543	2.3718	1.4235	0	0	2.1469	1.6949	2.4077	3.0149	1.6446	3.7561	1.5979	1.8279	0	1.3373	1.7514	0.4105	3.8418	2.2996	3.1248	2.5093	0	1.2227	1.3518	0	0	0	0	5.7577	0	3.2636
Negative	0.3895	101.944	0.3895_101.9436	1.8972	2.0606	2.6033	2.0998	1.7605	1.4349	1.835	2.2674	2.4217	1.1083	0	0	0	2.5405	1.8947	1.4961	1.629	1.2578	1.7484	1.615	0	2.0867	0	3.1787	2.4556	1.4113	1.7673	2.1056	1.807	1.3749	1.9651	2.0582	2.5815	2.8576	2.2932	1.9008	1.9671	1.4671	1.9307	1.5971
Negative	0.4841	102.055	0.4841_102.0555	7.4497	6.4228	10.9648	5.5896	5.4249	0.7265	1.6818	1.6162	2.09	0.6101	3.3232	2.9028	3.7866	4.4515	1.8797	0	1.5198	1.0383	0.544	0.5745	5.8574	5.6986	4.8895	4.9339	8.1172	1.3819	0.7752	0.6357	0.9448	1.1211	4.3357	4.1769	8.3533	5.0339	6.9507	1.5192	0.6675	0.6773	1.6274	0.9731
Negative	0.4875	102.959	0.4875_102.9588	0	0	0	0	0	1.3505	0.9864	0.7202	1.8657	1.0572	0	0	0	0	0	0.8509	1.0649	0.8698	2.1016	0.8285	0	0	0	0	0	1.8905	2.8698	1.9781	2.2243	1.9047	0	0	0	0	0	1.6194	1.2885	3.5431	1.4343	2.7573
Negative	0.4741	102.974	0.4741_102.9741	0	0	0	0	0	1.3505	0.9864	0.7202	1.8657	1.0572	0	0	0	0	0	0	1.0649	0.8698	2.1016	0.8285	0	0	0	0	0	1.8905	2.8698	1.9781	2.2243	1.9047	0	0	0	0	0	1.6194	1.2885	3.5431	1.4343	2.7573
Negative	0.5338	586.031	0.5338_586.0309	1.029	0.7264	1.2064	1.4077	1.1748	0	0	0	0	0	2.7013	1.1094	2.6718	4.782	1.6456	0	0	0	0	0	2.9313	1.7434	4.0447	2.0657	1.8775	0	0	0	0	0	3.9283	3.1684	2.0553	4.2788	4.4504	0	0	0	0	0
Negative	0.5305	586.05	0.5305_586.0501	1.029	0	1.1193	1.4077	1.1748	0	0	0	0	0	2.7013	1.1094	2.6718	4.782	1.6456	0	0	0	0	0	2.9313	1.7434	4.0447	2.7085	1.2186	0	0	0	0	0	3.9283	3.1684	2.0553	4.2788	4.4504	0	0	0	0	0
Negative	3.6959	586.307	3.6959_586.3071	0	0	0	0	0	14.5735	0.4398	1.0966	1.7438	1.9193	0	0	0	0	0	0.3538	1.1724	1.328	6.0124	1.2729	0	0	0	0	0	1.0818	3.1694	8.3021	3.4668	2.425	0	0	0	0	0	0.7754	0.4925	1.2087	0.967	0.7664
Negative	0.4684	586.815	0.4684_586.8154	0	0	0	0	0.2198	1.2592	0.7204	0.698	2.1092	1.6047	0	0	0	0	0	0	0.886	0.8231	0.6606	0.4996	0	0	0	0	0	0.6666	0	0.8487	1.1326	0.7847	0	0.7566	0	0	0.7063	1.4385	0.6667	0.5314	0	0
Negative	3.7629	587.108	3.7629_587.1084	0	2.7153	3.3843	3.4943	0	1.4829	4.038	3.4215	2.2866	2.0057	0	3.6092	0	0	0	0	0.5157	1.2893	0	0	0	0	0	0.5751	0	0.4806	1.3442	1.0978	1.5505	0	0	0	0	0	0	0.1557	0	0.8828	0.5133	1.126
Negative	0.4794	587.126	0.4794_587.1262	0.4273	0	0	0.3432	0.5281	0	0	0	0.1827	0	2.2281	0.6387	2.7816	3.6185	0.8576	0	0.1384	0	0	0	0	3.6789	5.5668	3.5176	1.1988	0	0.2147	0	0.5011	0	3.0751	1.6725	0.878	2.1154	0.7338	1.2994	1.3345	0.4883	0	0
Negative	3.6122	587.234	3.6122_587.2343	0	0	0	0	0	0	0	0	0	0	0	0	0	0	0	0	0	0	0	0	0	0	0	0	0	0	0	0	0	0	3.6295	4.0935	3.4277	0	5.6264	7.2827	6.7662	1.0926	3.7275	2.3372
Negative	3.7201	587.236	3.7201_587.2355	0	0	0	0	0	0	0	0	0	0	0	0	0	0	0	0	0	0	0	0	0	0	0	0	0	0	0.7831	0.4593	0.2887	0	0	0	0	0	0	2.5224	2.2641	0	1.3322	0
Negative	2.8909	589.177	2.8909_589.177	2.6244	2.3779	1.3308	2.412	3.5786	0	0	0	0	0	1.3414	0	1.0399	1.0807	0.5635	0	0	0	0	0.2985	2.2476	1.0521	0.9982	0.9746	1.3658	0.2603	0	0.3658	0	0	2.5783	2.9866	3.2116	3.6605	3.1213	0	0	0	0	0
Negative	2.7907	589.183	2.7907_589.1827	2.2893	2.2295	1.1433	2.2264	3.221	0	0	0.3142	0	0.3755	0.8981	0	1.2438	0.9798	0.6945	0	0	0	0	0	1.8692	1.3127	1.5389	1.2903	1.8456	0	0	0	0	0	2.0355	2.8883	3.0062	3.0181	3.3678	0.7135	0.7995	0	0.8322	0
Negative	3.1704	589.249	3.1704_589.2491	0	0	0	0	0	0	0	0	0	0	0	0	0	0	0	0	0	0	0	0	0	0	0	0	0	0	0	1.9853	2.5027	0	0	0	0	0	0	0	0	0.9766	0	0
Negative	7.0239	589.284	7.0239_589.2836	0	0	0	0	0	0.7041	0.666	0	0.6725	0.327	0	0	0	0	0	0.5163	1.0218	0.8249	4.192	2.5873	0	0	0	0	0	0.5434	0.7943	0.8366	0	0.6566	0	0	0	0	0	0	0	0.7684	0.7897	1.4448
Negative	5.8471	589.321	5.8471_589.3214	0	0	0	0	0	3.6654	0	0	3.2847	5.5739	0	0	0	0	0	0	0	0	2.9038	5.3715	0	0	0	0	0	0	4.8934	5.5231	5.8988	0	0	0	0	0	0	1.6912	2.7833	5.031	6.0452	7.9757
Negative	5.4378	589.323	5.4378_589.3227	0	0	0	0	0	4.134	4.1791	4.6256	2.9678	0	0	0	0	0	0	0	0	0	0	0	0	0	0	0	0	4.9619	0	3.9825	0	3.929	0	0	0	0	0	0	0	0	0	0
Negative	2.6356	591.137	2.6356_591.1368	3.1521	4.3131	3.1181	3.5054	4.3383	1.5596	0	0	2.7265	2.0855	4.8683	4.5986	4.2191	5.8665	6.8272	0	0	2.3257	2.6569	0	7.9471	5.6012	6.6115	6.3434	9.7596	2.1384	0	0	0	2.2561	5.2985	7.3426	11.4699	9.1464	15.3027	7.058	5.4424	5.4472	3.3721	3.3555
Negative	3.2855	591.139	3.2855_591.1385	1.5536	0	0	0	0	0	0	0	0	0	0	0	0	0	0	0	0	0	0	0	0	5.3099	4.6044	4.8125	0	0	0	0	0	0	0	0	0	0	0	0	0	0	0	0
Negative	0.4666	104.036	0.4666_104.0363	10.3122	13.3514	16.4395	7.5309	11.2934	0	0	0	0	0	11.2866	7.9207	7.0652	8.2427	7.2646	0	0	0	0	0	7.1649	10.6934	6.7756	8.538	18.0313	0	0	0	0	0	3.6658	6.423	8.2388	5.3554	8.462	0	0	0	0	1.6006
Negative	0.4854	104.961	0.4854_104.9611	0	0	0	0	0	2.2058	2.8745	3.8831	1.7667	2.3597	0	0	0	0	0	5.5608	2.4592	2.443	4.1233	3.4602	0	0	0	0	0	1.0639	2.3206	2.1337	1.7258	1.4643	0	0	0	0	0	0.6216	1.6161	2.6997	2.1954	4.1142
Negative	0.5063	105.02	0.5063_105.0199	16.0201	12.5461	17.7451	12.9126	14.9054	4.5323	4.8294	5.2005	6.8175	6.3921	15.4866	18.9397	13.0317	21.1543	18.5932	3.8295	6.7057	6.0934	6.3605	6.5211	15.5459	14.0113	10.992	12.7913	17.5099	3.3899	4.3334	5.0972	5.7152	3.4669	9.7497	11.7775	28.6214	11.9619	20.425	6.5623	5.0996	5.3452	6.309	5.7281
Negative	0.6037	105.02	0.6037_105.0204	0	0	0	0	0.2857	0	4.8294	5.2005	0	4.6542	0	0	0	0	0.7504	3.5987	0	0	6.3341	5.341	0	0	0	0	0	0	0	0	0	2.9614	0	0	0	0	0	0	0	3.7142	0	0
Negative	0.4989	108.905	0.4989_108.9047	0	2.5367	0.5244	0.605	0.4155	5.3537	6.0317	7.2935	3.5693	4.0653	0	0	0	0.408	0.8776	0.9334	3.2548	4.036	3.1178	3.5795	0	0	0	1.223	0.5184	4.4394	6.7239	4.9674	5.049	3.968	0	0	0	0.3846	0.6592	0.1466	0.4751	1.9476	1.5171	1.4426
Negative	2.5002	109.029	2.5002_109.029	0	0	0	0	0	0.5438	0	0.965	0.7751	0.259	0	0	0	0	0	1.3327	0	1.5327	2.9818	4.1334	0	0	0	0	0	0	1.6501	0	0.436	0	0	0	0	0	0	0	0	0	0	0.4343
Negative	2.7818	109.029	2.7818_109.0294	0	0	0	0	0	0.4676	0.4693	4.4333	1.9869	0.519	0	0	0	0	0	1.8324	0	3.7678	6.5114	9.1231	0	0	0	0	0	0	3.4386	0.6592	0.8273	0	0	0	0	0	0	0.8447	0.6571	0	0	1.1388
Negative	2.6807	109.03	2.6807_109.0298	0	0	0	0	0	0.4257	0	1.1301	0.6256	0	0	0	0	0	0	0	0	1.8149	2.9822	4.894	0	0	0	0	0	0	1.5721	0.4903	0	0	0	0	0	0	0	0.5548	0	0	0	0.3828
Negative	1.6536	109.03	1.6536_109.0298	3.7326	2.767	2.5599	3.2478	3.735	1.8269	1.2198	0	1.1796	0.8989	6.7683	5.7699	6.4543	5.2577	5.4325	2.3068	2.0322	2.0825	1.2875	0	4.5164	4.0638	2.9533	3.1187	2.8698	0.6077	0.7002	0	0.4612	0.4597	2.1358	0	1.8176	2.2692	0	0	0	0	0	0
Negative	1.2979	111.007	1.2979_111.0073	63.3647	74.3644	78.8205	115.011	64.5755	36.5844	6.2359	34.2119	48.3183	41.3431	45.1691	40.0884	33.5963	39.7388	29.6312	12.0311	23.1583	19.8612	57.0139	33.1627	53.1103	52.1045	34.16	53.2719	45.2688	0	0	0	0	3.1157	78.077	58.6185	51.1169	90.3502	74.5512	104.448	73.9702	63.3052	69.1227	67.2857
Negative	0.6859	111.008	0.6859_111.0081	36.5287	58.9755	72.6529	44.2586	41.3934	62.7507	69.4098	66.4369	59.084	35.767	73.0972	70.7961	77.3029	87.2843	58.829	59.169	53.6062	49.0201	52.9612	57.7691	72.746	71.4746	93.7138	77.265	57.0963	71.1314	64.6033	67.5782	68.8027	40.229	79.1289	72.5454	51.3897	94.911	75.4213	80.961	76.3108	52.0363	50.5214	37.6714
Negative	1.1872	111.008	1.1872_111.0082	0	0	0	1.3501	0	5.4089	0	11.9362	15.066	8.3568	0	2.7524	0	0.9142	0	0	5.2948	4.6279	15.7386	14.5311	0	0	0	0	0	0	0	1.1594	0	0	0	0	0	0	0	40.3992	25.9365	15.4211	17.5968	30.3173
Negative	1.8661	111.008	1.8661_111.0085	0	0	0	0	0	0	0	2.5134	2.3174	0	0	0	0	0	0	0	0	0	7.7451	6.071	0	0	0	0	0	0.9557	1.2806	0	0.7904	0	0	0	0	0	0	4.5858	3.7005	0	0	12.4821
Negative	0.5362	111.009	0.5362_111.0086	31.4995	31.2808	38.18	32.916	32.3389	32.7595	20.5065	14.8693	34.3243	22.1389	45.2563	38.136	41.8032	59.8982	43.8222	16.0044	26.9048	17.1915	24.3885	24.8285	48.9867	51.2034	67.2452	68.6103	42.6776	24.133	63.0263	52.1001	47.3255	22.4185	56.7118	47.7489	37.5995	59.4743	42.5433	57.0917	43.0227	19.477	33.8999	22.1122
Negative	1.594	111.009	1.594_111.009	0	0	0	0	0	0	0	2.0299	0	0	0	0	0	0	0	0	0	0	0	0	0	0	0	0	0	0	0	0	0	0	0	0	0	0	0	3.3826	2.4645	0	0	2.0338
Negative	0.9406	111.009	0.9406_111.0091	0.7551	0	1.2929	0	0	1.9732	1.8751	4.4627	6.2266	6.8101	1.4716	1.1356	0	1.6445	0.586	1.7185	3.2375	3.9479	7.6035	9.6906	1.6864	1.5395	2.0056	1.8679	1.4328	3.9187	6.5667	1.1381	3.103	5.3072	2.0135	0	1.0592	1.2918	0	20.6206	12.9916	7.0794	6.1714	12.8464
Negative	3.0658	591.179	3.0658_591.1794	0	0	0	0	0	0	0	0	0	0	0	0	0	0	0	0	0	0	0	0	0	2.3415	0	0	3.6839	0	0	2.5766	1.7843	0	0	0	0	0	0	0	0	0	0	0
Negative	2.8765	591.187	2.8765_591.1873	0	1.1394	0.4281	0	0	0	0	0	0	0	0	0.3732	0	0	1.07	0	0	0	0	0	0	0	0	0	0	0	2.2626	2.2691	2.9149	0	0	0	0	0	0	0	0	0	0	0
Negative	3.1834	591.188	3.1834_591.1885	0	0	0	0	0	0	0	0	0	0	2.4759	0	0	0	0	0	0	0	0	2.6105	4.1235	2.1877	0	0	0	0	1.6702	2.7644	2.2061	0	0.6774	0	0.9011	0	0	0	0	0	0	0
Negative	2.7944	591.216	2.7944_591.2159	0	0	0	0	0	0	0	0	1.3124	1.5358	0	0	0	0	0	0	0	0	0	0	0	0	0	0	0	0	0	0	0	0	0	0	0	0	0	0	0	3.2618	2.5943	2.676
Negative	3.1836	591.228	3.1836_591.228	10.4698	8.4759	23.1243	14.7101	12.9254	15.3671	12.5296	17.2408	13.775	14.6003	14.5214	18.6101	10.7018	21.9657	14.4249	11.4767	17.1061	19.1438	11.1214	0	0	0	0	7.6614	0	8.6588	0	0	0	12.2969	0	0	0	0	0	4.7567	7.9054	17.4576	14.0109	14.9484
Negative	3.4212	591.229	3.4212_591.2286	0	0	3.2687	0	0	0	9.2151	2.6381	1.8954	0	0	0	0	3.7117	0	8.3783	12.567	0	2.0966	0	0	0	0	0	0	0	0	0	0	4.9588	0	0	0	0	0	0	0	13.8306	11.4216	10.26
Negative	2.8556	591.229	2.8556_591.2286	0	0	0	0	0	0	0	2.3557	2.1151	2.7992	0	0	0	0	0	0	3.1315	4.2042	1.7691	0	0	0	0	0	0	0	0	0	0	2.9433	0	0	0	0	0	1.41	1.8583	3.9831	3.1058	2.6799
Negative	3.0254	591.229	3.0254_591.2292	0	0	1.7302	0	0	15.2237	11.0009	11.8843	13.3327	12.5016	0	3.8575	0	5.8526	3.0296	8.3565	16.4223	16.4114	0	0	12.0304	6.6847	17.1592	10.9448	15.8571	0	0	0	0	12.4862	4.9643	3.8168	5.4043	6.8254	0	4.0648	7.7608	14.5882	11.6563	11.7793
Negative	3.5716	591.229	3.5716_591.2294	0	6.0006	14.7697	8.5602	0	0	6.9175	7.6825	6.8502	0	0	9.8571	0	10.5839	7.444	6.0911	7.9805	8.9134	0	0	0	0	0	0	0	0	0	0	0	4.79	0	0	0	0	0	0	3.2166	6.4915	6.3842	8.5808
Negative	2.8007	591.236	2.8007_591.2365	0	0	0	0	0	0	2.2564	2.1907	1.2303	0	0	0	0	0	0	1.7723	0	1.6146	1.4574	1.6026	0	0	0	0	0	0	0	0	0	2.2734	0	0	0	0	0	1.56	1.8461	3.3785	2.6596	2.3573
Negative	2.4723	591.264	2.4723_591.2639	6.1509	5.9815	0	3.1154	6.0165	4.1839	0	0	4.0089	2.8625	20.9477	40.2562	26.7147	26.6083	45.0358	26.6753	10.6812	13.9474	13.0115	16.8678	31.1159	30.0927	34.5221	45.8603	38.2427	18.0542	36.7397	39.9568	40.75	29.2393	20.447	32.8125	43.8231	14.9602	30.1971	14.8225	17.4619	7.1317	12.9237	16.4043
Negative	2.1685	591.26	2.1685_591.26	0	0	0	0	0	0	0	0	0	0	0	0	0	0	0	0	0	0	0	0	0	0	0	0	0	0	1.9958	1.8534	2.1513	0	0	0	0	0	0	0	0	0	0	0
Negative	2.3064	591.263	2.3064_591.2631	0	0	0	0	0	0	0	0	0	0	0	0	0	0	0	0	0	0	0	2.2469	0	0	0	0	0	3.757	5.5325	3.5543	4.1407	3.0592	0	0	0	0	0	2.4686	2.9029	0.9048	1.7925	3.5922
Negative	0.5123	591.265	0.5123_591.2652	0	0	0.1243	0	0	0	0.2017	0.3151	0	0.1909	0	0	0	0	0	0.9715	0.6728	0.5944	0.5446	0.8083	0.359	0	0	0	0	0.8238	0	1.6908	1.7069	0.9522	0	0	0	0	0	0.6354	0.5446	0	0.6588	0.7815
Negative	5.5851	591.268	5.5851_591.2677	0	0	0	0	0	0	0	0	0	0	0	0	0	0	0	0	0	0	0	0	0	0	0	0	0	0	0	0	0	0	0	0	0	0	0	3.9811	0	0	1.8472	0
Negative	5.6994	591.338	5.6994_591.3376	0	0.6523	0.5903	0.7488	0	6.1355	2.8574	0	5.1511	6.7057	0	0	0	0	0	5.3212	3.5648	5.1438	3.5656	6.7087	1.0967	1.1378	0	0.853	0	12.6213	10.8818	10.8083	12.8137	4.3562	1.2232	0.8967	0.7555	0	0.9865	5.8527	7.558	9.0702	13.1542	15.7596
Negative	1.0811	111.009	1.0811_111.0091	0	0.1523	0	0.3902	0.1571	3.371	0	4.2135	7.8635	4.8171	0	0.1183	0	0	0.1294	0	0	2.4634	5.3321	7.1238	0	0	0	0	0	1.3942	0	0	0	0	0	0	0	0	0	24.8543	0	8.299	0	0
Negative	0.8471	111.01	0.8471_111.01	0	0	1.9492	0	0	0	2.249	0	0	0	0	2.212	0	3.3656	1.8	0	0.5212	3.7282	0	0	3.5592	0	5.0124	3.2647	2.1609	4.7058	6.9466	4.693	4.4669	7.2044	3.8285	0	1.5055	3.9864	0	0	0	0	6.1714	0
Negative	0.46	112.986	0.46_112.9858	0	0	0	6.3155	0	0	9.013	0	2.3458	0.5481	7.3139	6.5183	0	0	10.462	0	0	0	0	0	17.2875	22.6046	10.8284	17.7903	25.2586	6.104	5.956	3.5326	4.0455	5.2263	16.846	29.6565	41.317	27.3085	41.7934	0	0	7.9135	7.6714	2.0489
Negative	4.107	113.025	4.107_113.0246	0.4814	0	0.4772	0	0	2.2008	0	1.6243	1.8309	1.7249	4.626	3.6121	3.5661	6.5093	3.7055	3.4003	2.4646	2.9543	0	3.3926	4.4423	3.3313	0	4.5127	4.2379	3.0798	3.2579	2.9543	3.9148	2.2629	5.0044	4.6402	3.3265	0	5.6576	3.2188	3.9249	0	2.7651	3.7258
Negative	4.3509	113.025	4.3509_113.0246	0	0	0	0	0	0.6158	0	0	0	0	0	0	0	0	0	0	0	0	0	0	0	0	0	0	0	0	0	0	0	0	3.2476	3.5361	0	0	5.3058	2.277	2.8221	2.3829	0	1.7256
Negative	3.9751	113.025	3.9751_113.0247	1.203	0	0	0	0	1.5529	0	1.2033	1.5092	1.2946	0	0	0	0.9926	0.5147	1.6851	1.4713	0	0	0	0	0.8128	0	1.4495	1.0924	2.1043	2.42	2.8529	3.3967	1.7915	0	0	0.6735	0	1.1341	1.8898	2.7461	2.3382	2.3793	3.0416
Negative	3.025	113.025	3.025_113.0251	0	0.4836	0	0	0	0	0	0	0	0.3529	0	2.782	0	0	2.8767	1.892	2.2268	0	0	0.5525	0	0.8243	0	0.7096	0	0	0	0.818	0	0.5515	0	0	0	0	0	0	0	0	0	0
Negative	0.4941	113.025	0.4941_113.0251	2.3232	1.7882	3.8982	1.7981	2.6422	4.0096	1.3826	1.4674	4.9797	3.097	2.3372	2.455	2.3391	3.7818	1.9078	2.811	2.424	2.6215	2.143	3.9384	2.5402	1.9679	3.0268	2.4425	2.4245	0	0	2.0982	0	1.7768	0	2.4074	3.848	2.8257	3.1547	3.786	4.3935	4.1269	3.8065	5.0858
Negative	3.725	113.06	3.725_113.0601	0	0	0	0	0	1.4377	0.692	1.0283	0.8311	1.3835	0	0	0	0	0	3.0597	1.6736	2.2715	1.7649	1.6922	0	0	0	0	0	0.1115	0.1011	0	0	0	0	0	0	0	0	0	0	0	0	0
Negative	0.4387	114.989	0.4387_114.9891	15.9942	23.7084	25.4509	20.4583	18.2344	15.0012	23.3483	26.8749	18.3755	12.1557	16.1048	17.3504	13.0617	18.8591	0	15.2721	19.729	12.7319	16.5833	14.71	13.4032	15.4849	12.5695	0	15.3859	14.6986	19.1267	18.3771	15.0287	10.228	14.5609	15.5719	18.4905	0	16.9231	16.3127	16.8473	16.6836	15.2829	21.3385
Negative	0.5232	115.003	0.5232_115.003	44.7266	50.8624	81.4212	46.384	38.2101	71.6174	55.6121	51.9105	68.088	52.37	40.3706	58.6433	35.0104	37.0771	54.626	77.2835	75.2059	58.3003	64.4408	61.6477	37.7866	58.3806	61.3974	68.1966	37.5101	140.97	56.171	42.8934	38.7302	140.929	34.9278	32.3226	36.3924	40.7788	22.5944	50.2247	87.362	61.8375	48.0483	54.8393
Negative	0.6179	115.003	0.6179_115.0033	11.1772	23.9388	34.5371	0	9.5617	40.2698	40.8405	22.1159	32.5276	49.9866	20.5139	16.0215	23.4913	21.173	2.4192	77.2835	0	23.659	55.5867	45.6224	0	2.4899	38.7397	30.9188	18.5837	70.0352	21.1373	17.4571	14.5114	70.1717	14.8798	8.5477	7.4629	13.9011	12.1779	14.8534	37.988	25.7768	16.6462	54.8393
Negative	0.8525	115.004	0.8525_115.0042	0	0	0	0	0	0	0	0	0	0	1.0006	0.9416	0.622	0	0	1.9255	0	0	0	2.2538	0	1.057	1.4621	1.2608	0.5106	2.0424	1.2111	1.3948	0.855	4.6283	0	0	0	0	0	0.4482	0	0	0	0
Negative	0.7226	115.005	0.7226_115.0049	0	0	0	0	0	0	0	0	0	0	1.9193	1.7266	2.4921	2.2203	1.9183	27.7536	0	0	1.6583	31.9763	0	1.3522	3.098	1.8486	0.9762	3.3402	0	10.6613	11.0057	4.5556	1.3166	0.9608	0	0	0	0	0	0	0	0
Negative	0.9541	115.005	0.9541_115.005	0	0.3202	0	0	0	0.9526	0	0	0	0	0.5086	0	0	0	0	0	0	0	0	0.6872	0	0.6974	0	0	0.559	1.901	0	0	0	2.8338	0	0	0	0	0	0	0	1.3378	0	1.0873
Negative	0.9481	115.039	0.9481_115.0392	3.713	6.1347	10.6976	6.5379	2.6671	3.269	5.6231	3.9236	3.7228	5.4389	2.4508	1.008	3.0608	1.274	0	1.8227	4.0513	4.3908	2.8542	3.7336	0	0	0	0	0	0	0	0	0	0	0	0	0	0	0	0	0	0.968	0	0
Negative	6.5763	591.338	6.5763_591.3377	0	0	0	0	0	1.2346	1.7231	0	0	1.7051	0	0	0	0	0	0	0	0	0	0	0	0	0	0	0	1.6019	3.7004	10.4469	8.2304	3.0164	0	0	0	0	0	0	0	0	0	0
Negative	5.263	591.34	5.263_591.3397	0	0	0	0	0	0	0	0	0	0	0	0	0	0	0	0	0	3.7264	0	0	0	0	0	0	0	0	0	0	0	3.1482	0	0	0	0	0	0	0	0	0	0
Negative	5.7523	591.341	5.7523_591.3413	0	0.9851	0.6525	0	0.6493	0	0	0	0	0	0	0	1.2653	0	0	0	0	5.1438	0	0	2.3446	0.8176	1.6579	1.2888	1.2722	0	0	0	0	4.3562	2.4491	0	0	1.7308	1.083	0	0	0	0	0
Negative	2.1919	593.112	2.1919_593.1118	0.5987	0.5869	0	0	0	0	0	0	0	0	0	0.795	0.8396	0.8261	1.2333	0	0	0	0	0	2.2046	3.2271	1.3581	2.7388	3.2846	0	0	0	0	0	0	0.5079	0	0.4553	0.6574	0	0	0	0	0
Negative	2.4818	593.149	2.4818_593.1485	0	0	0	0	0	14.1644	10.4907	9.6455	18.6023	14.4325	0	0	0	0	0	6.6897	12.6711	12.1181	13.4171	13.6356	0	0	0	0	0	15.3341	23.4655	21.1086	25.1893	16.502	0	0	0	0	0	56.0452	49.4154	42.4779	48.1428	38.127
Negative	2.6144	593.149	2.6144_593.1493	91.9255	94.3622	71.0193	92.9172	93.4472	24.185	21.7385	20.8302	35.8822	29.8986	92.9546	86.4428	80.1519	115.458	94.6258	23.261	33.7663	40.05	44.0705	31.4256	129.729	105.416	137.13	110.478	167.026	37.3972	56.5153	47.4711	57.4423	46.9499	132.091	123.489	148.774	175.985	236.863	110.149	84.0989	82.7291	62.9647	56.1369
Negative	2.0218	593.15	2.0218_593.1501	0	0	0	0	0	4.2685	0	0	3.868	0	0	0	0	0	0	0	2.1619	0	2.0696	0	0	0	0	0	0	0	0	0	0	0	33.7417	36.8713	30.5018	33.1535	36.627	20.3238	19.0702	16.2737	0	18.9647
Negative	2.747	593.15	2.747_593.1505	0	0	0	13.6125	14.7208	0	8.1112	6.9094	0	9.2954	26.4048	29.6147	31.091	41.494	19.9632	8.491	18.447	28.4126	15.4298	21.0722	28.5508	33.3259	27.2759	28.0843	25.0679	10.0909	19.1642	17.6038	22.9663	15.3725	0	7.9955	0	0	0	20.0034	15.253	17.9585	0	13.8992
Negative	2.3603	593.151	2.3603_593.1506	0	0	0	0	0	15.681	12.2497	11.7655	18.0412	6.4503	0	0	0	0	0	4.968	6.5474	2.3214	7.4064	6.6389	0	0	0	0	0	7.0513	12.0754	10.4293	13.5171	7.032	0	0	0	0	0	21.323	23.7421	16.1154	13.9314	15.423
Negative	2.8223	593.151	2.8223_593.151	20.7426	31.0287	18.4123	24.9339	25.4033	5.0004	8.1112	6.9094	0	5.4621	28.6026	44.3563	29.2709	35.9591	29.4395	0	14.7596	7.2315	4.5264	5.3662	41.3817	43.8746	35.044	36.2238	37.4371	1.751	0.5506	0	3.0125	0	19.2952	20.6324	18.1466	0	20.3039	0	7.7516	5.2392	5.4057	0
Negative	2.2881	593.151	2.2881_593.151	0	0	0	0	0	15.681	12.2497	11.7655	18.0412	14.5683	0	0	0	0	0	4.968	5.6877	0	7.4064	3.1484	0	0	0	0	0	5.28	4.0983	0	0	3.0782	0	0	0	0	0	13.7676	15.4296	10.4257	9.3928	10.978
Negative	2.1752	593.151	2.1752_593.1512	0	0	0	0	0	7.9267	3.4022	3.2403	5.6596	0	0	0	0	0	0	0	0	0	0	2.8802	0	0	0	0	0	3.6292	0	0	0	0	0	0	0	0	0	0	0	0	0	0
Negative	3.1292	593.151	3.1292_593.1513	39.1684	40.2648	38.2273	53.3866	33.6207	0	0	0	0	0	13.2972	30.4201	26.262	11.0905	9.1603	0.3491	0	0	0	0	8.5535	6.1747	14.3023	0	0	0	0	0	0	0	44.7028	30.5655	25.1049	0	10.0683	13.3671	0	0	0	0
Negative	0.5163	593.151	0.5163_593.1514	0	0	0.1486	0	0	3.3177	4.9537	3.885	4.0832	1.9706	0	0	0	0	0	1.1708	3.7961	4.1274	3.0474	4.4151	0	0	0	0	0	2.7749	0	6.3477	5.1465	3.0055	0	0	0	0	0	9.0182	7.9071	6.3962	0	4.5726
Negative	2.9241	593.152	2.9241_593.1515	11.8864	12.4348	8.0683	13.8426	17.9855	3.3113	0	3.4634	0	3.5197	4.4657	6.5289	4.9102	4.8603	6.0344	0	0	0	0	0	5.1016	6.0327	3.3369	0	0	1.4113	0	0	0	0	8.9451	7.9819	7.6649	0	6.1811	0	0	0	0	0
Negative	1.7577	593.153	1.7577_593.1527	0	2.703	2.8329	3.6215	0	0	0.4948	0.6681	0.8719	0	0	0	0	0	0	0	0.6902	0	0	0.4332	0	1.0983	0	0	0.8847	0	0	0	0.6011	0	0	0	0	0	0	0	0	1.5483	0	0.9487
Negative	0.4985	115.992	0.4985_115.9922	0	0	0	0	0	4.4933	2.8498	3.0793	4.0028	3.2873	0	0	0	0	0	0	4.7166	3.29	4.1233	3.893	0	0	0	0	0	0	0	0	2.0025	0	0	0	0	0	0	2.7732	5.1121	3.4427	2.5733	0
Negative	7.0411	116.928	7.0411_116.9276	4.5621	0	0	0	0	0	0	0	0	0	0	0	0	0	0	2.5616	0	0	0	0	0	0	0	0	0	2.5142	0	0	0	0	0	0	0	0	0	0	0	0	0	0
Negative	6.4025	116.928	6.4025_116.9283	0	0	0	0	0.9642	0	0	0	0	0	0	0	0	0	0	0	3.1668	1.928	0	0	0	0	4.3866	0	0	0	0	0	0	2.3683	0	0	0	0	0	0	0	0	2.9862	0
Negative	5.4173	116.928	5.4173_116.9285	0	0	0	0	0	6.4332	0	0	0	0	0	0	0	0	10.0991	5.8572	0	6.9044	9.0043	5.1416	0	0	0	0	0	1.7694	2.5303	2.9516	0	0	0	0	0	0	0	0	0	0	0	3.3482
Negative	4.9412	116.928	4.9412_116.9285	0	0	2.7253	0	0	0	0	0	0	0	0	0	0	0	0	0.4362	2.059	0	0	0	0	0	0	2.128	0	0	0	0	0	0	0	0	0	0	0	0	0	0	1.9047	0
Negative	3.1236	116.929	3.1236_116.9286	0	0	0	0	0	1.9767	4.7508	0	4.0288	2.8734	0	0	0	0	0	2.1811	3.3434	3.0334	4.1996	0	0	0	0	0	0	0	0	0	3.299	0	0	0	1.0321	4.3421	0	7.6205	5.3595	5.9563	5.4674	2.9492
Negative	3.848	116.929	3.848_116.9286	0	2.64	0	0	0	0	0	0	0	0	0	0	0	0	0	0	0	0	0	0.6282	3.9884	0	3.0579	0	0	0.5194	0	0	0	0.2112	2.7352	0	3.3027	0	0	0	0	0	0	0
Negative	5.133	116.929	5.133_116.9288	0	0	0	0	3.1252	0	0	0	0	0	3.1914	0	0	0	0	0.4632	0	0	0	0	0	0	0	0	0	0	0	0	0	0	0	0	0	0	0	0	0	0	0	0
Negative	5.7407	116.929	5.7407_116.9293	0	0	0	0	0	4.3967	0	4.2276	3.4516	5.4945	0	0	0	0	0	0	0	0	0	1.8157	0	0	0	0	0	0	0	0	2.3573	0	0	0	0	0	0	0	0	2.8851	0	2.6327
Negative	0.7519	117.019	0.7519_117.0193	0.8549	1.8944	1.4136	0.676	0.9869	0.6043	3.0201	2.3424	0.6586	0.8361	3.1149	1.3191	4.5326	3.8734	3.5569	5.6913	0.7695	2.5627	2.3699	7.5579	4.6761	2.0165	4.339	3.2371	3.2993	6.2813	2.5107	2.475	2.2732	5.7152	2.9287	1.1928	1.4976	2.6539	1.8147	0.9052	1.5477	0.9433	0	2.445
Negative	0.5013	117.022	0.5013_117.0225	0	0	0	0.4316	0.6752	2.5232	1.4942	0	3.1538	2.0215	0	2.9916	0	6.5359	0	0	3.2205	2.0908	2.7069	0	6.49	0	0	0	0.7114	0	9.0697	6.3279	6.9498	0	0	0	0	0.4231	0.4709	3.562	3.3433	0	2.1803	0
Negative	0.4921	118.05	0.4921_118.0496	3.2002	0	3.6235	0	0	1.4595	1.7499	1.845	1.9168	0.946	0	0	1.9375	3.5247	0	1.6414	1.2352	0.6109	1.0428	0.7776	2.1272	0	2.0903	0	2.2493	1.7032	0	0.3865	0	1.5072	1.3927	1.1054	0	1.9008	0	2.0028	2.3387	0.9869	0.9748	1.7305
Negative	0.4861	118.933	0.4861_118.9331	0	0	0	0	0	2.5391	1.2812	1.4019	4.6408	2.35	0	0	0	0	0	0.6215	2.7773	1.7265	1.5628	1.8331	0	0	0	0	0	3.1054	3.2039	3.091	3.8517	2.3284	0	0	0	0	0	0	0.5215	1.4513	1.1431	1.1026
Negative	0.5026	119.037	0.5026_119.0366	1.978	2.2995	3.4876	2.4961	2.5082	3.4468	1.6548	2.0116	3.5545	2.1206	2.537	2.1044	3.2731	3.231	2.1545	2.9619	3.0494	3.2486	2.1783	3.2825	3.0196	2.1217	2.8307	2.2703	2.4543	1.8512	2.7537	2.2477	1.9467	1.7541	2.1801	2.3413	3.5221	3.9792	4.1255	4.1862	3.8222	2.8473	3.0558	3.7063
Negative	0.481	120.943	0.481_120.9433	0	0	0.1857	0	0	2.31	1.2786	1.7814	2.9348	2.154	0	0	0	0	0	1.7843	2.3017	1.6927	1.9623	2.2865	0	0	0	0	0	1.6818	2.0035	1.5431	1.9436	1.546	0	0	0	0	0	0.2855	1.2725	1.1294	1.1602	0.9688
Negative	3.7875	120.996	3.7875_120.9963	2.3281	2.8898	6.8624	4.1461	2.8567	1.5813	0	0	0	0	3.012	2.3363	2.7776	4.0231	0	0	0	0	0	0	2.424	0	3.2827	1.7734	0.7452	0	0	0	0	0	4.5569	2.7461	2.5037	4.3184	2.6839	0	0	2.0657	2.6251	1.5821
Negative	0.5171	593.191	0.5171_593.1908	0	0	0.1137	0.1224	0	0	0	0	0	0	0	0	0	0.1988	0	0	0	0	0	0	0	0	0	0	0.1708	0	5.0496	0	0	0	0	0	0	0.2044	0	0	0	0	6.0821	0
Negative	3.9428	593.193	3.9428_593.1926	0	0	0	0	0	0	0	0	1.6377	0	0	0	0	0	0	1.1838	1.6982	1.3625	1.6991	1.3972	0	0	0	0	0	0	0	0	0	0	0	0	0	0	0	0	0	0	0.4282	0
Negative	3.2468	593.207	3.2468_593.2075	0	2.1171	3.6507	0	0	3.0763	1.9899	0	0	0	0	0	0	2.8328	0	0	0	0	0	0	0	0	0	0	0	5.1656	0	2.8642	2.7961	0	0	0	0	0	0	0	0	0	0	0
Negative	3.3291	593.241	3.3291_593.2408	1.8874	0	4.4325	1.8139	3.7193	5.058	0	2.7922	0	0	0	3.4707	2.4424	0	3.6208	0	4.1418	5.1137	2.4403	3.6034	4.1667	4.5657	4.7125	4.4073	4.318	5.6988	4.5462	4.3316	3.551	6.6552	1.7041	1.7631	2.0958	1.2859	0	3.6549	5.8415	8.4893	9.7252	11.8899
Negative	7.2485	593.26	7.2485_593.2605	0	0	0	0	0	0	0	0	0	0	0	0	0	0	0	0	0	0	4.6107	4.5753	0	0	0	0.1529	0	0	0	0	0	0.7376	0	0	0	0	0	0	0	0	0	0.4086
Negative	5.7927	593.353	5.7927_593.3526	0	0	0	0	0	0	0	0	0	0	0	0	0	0	0	0	0	0	0	0	0	0	0	0	0	0	0	0	1.6714	0	0	0	0	0	0	0	0	0	0	2.3797
Negative	5.516	593.354	5.516_593.3538	0	0	0	0	0	0	0	0	2.8893	0	0	0	0	0	0	0	1.7441	0	0	2.3413	0	0	0	0	0	0	6.8576	8.3846	7.9682	0	0	0	0	0	0	3.3778	4.9614	6.1138	9.3265	14.4376
Negative	2.9726	595.127	2.9726_595.1272	0	0	0	0	0	0	0.2787	0	0.4699	0	0.8979	1.9749	0	0	0	0	0	0	0	0	0	0	0	0	0	0	0	0	0	0	5.2253	8.0995	12.0488	3.4345	8.3386	0	0	0	0	0
Negative	2.1768	595.129	2.1768_595.1294	0	0	0	0	0	0	0	0	0	0	0	0	0	0	2.4404	0	0	0	0	0	6.0135	9.0545	3.5462	0	8.3984	0	8.0483	6.1075	8.5218	4.7277	0	0	0	0	0	0	0	0	0	0
Negative	2.0807	595.13	2.0807_595.1303	0	0	0	0	0	0	0	0	0	0	0	0	0	0	0	0	0	5.4597	0	2.4831	0	0	0	0	0	2.6985	8.0483	5.6902	7.1185	4.3247	2.8781	3.0025	0	0	0	0	0	0	0	0
Negative	5.9651	595.145	5.9651_595.1452	0	0	0	0.7107	0	1.0981	0.9686	0.5583	0.8856	0.9753	0	0	0	0	0	0.4271	0.7259	0.7866	0.7601	0.8313	0	0	0	0	0	1.4957	2.5769	0.8938	1.4631	2.0467	0	0	0	0	0	0.7163	1.5421	3.8258	1.761	1.7511
Negative	3.2895	595.209	3.2895_595.2089	1.3324	1.1992	0.9419	1.2227	0.944	0	0	0	0	0	0	0.7727	0.7567	0	0.402	0	0	0	0	0	0.8548	1.1445	1.306	0.839	0.9738	0	0	0	0	0	2.9217	2.3894	3.0011	2.6479	1.9805	0	0	0	0	0
Negative	1.912	595.258	1.912_595.2584	0	0	0	0	0	1.5235	0	2.5918	1.6371	0	0	0	0	0	2.5742	5.9069	2.0955	3.0838	3.3418	5.5687	0	0	0	0	0	7.8801	5.8909	3.7991	4.9094	5.8431	0	0	0	0	0	1.8416	2.2933	0.9672	1.7532	4.4073
Negative	4.0864	597.145	4.0864_597.1447	0	0	0	0	0	0	0	0	0	0	3.2067	0	8.0378	0	0	2.5388	3.5233	2.7484	5.0319	3.6019	0	0	0	0	0	0	1.6729	0	0	0	0	0	0	0	0.3617	0	0	0	0	0
Negative	1.93	597.147	1.93_597.1472	1.7876	1.2469	1.8632	2.0035	1.8032	0	0	0	0	0	1.3945	0.715	1.4258	1.2116	0.7594	0	0	0	0	0	3.1274	2.0613	4.5967	3.1763	2.0089	0	0	0	0	0	0	0.6598	0	0	0	0	0	0	0	0
Negative	3.1889	598.067	3.1889_598.067	0	0	1.2164	0.835	0	0	0	0	0	0	4.453	0	3.378	6.5771	1.4898	0	0	0	0	0	3.4831	2.8724	3.4167	3.7022	3.1617	0	0	0	0	0	3.2465	2.705	4.2081	3.1837	4.1295	6.0074	0	0	0	0
Negative	3.2937	121.029	3.2937_121.029	0	0	0	0	0	2.9271	0	1.9482	2.6709	1.8752	0	0	0	0	0	1.0861	0	2.0074	0.8685	0	0	0	0	0	0	2.7462	3.3403	4.3705	3.5416	2.9076	0	0	0	0	0	0.9345	0	2.2301	2.2106	1.0791
Negative	3.4702	121.029	3.4702_121.0293	4.2681	5.7007	4.1805	4.4738	5.5101	13.8194	6.5921	8.9227	12.97	6.972	0	0	0	0	3.5889	7.8878	4.1009	11.3744	6.2023	5.0175	9.5734	6.3569	9.8304	9.4702	7.228	13.0353	15.6921	17.9341	11.6025	12.1086	5.6217	4.5316	0	4.0294	0	3.5152	5.4024	9.4161	10.3736	7.6765
Negative	3.1633	121.029	3.1633_121.0295	0	0	0	0	0	2.1329	0	2.1288	2.2477	2.1744	0	0	0	0	0	2.1892	0.9135	0	1.2918	0	0	0	0	0	0	3.9585	1.8101	2.1663	0	5.0254	0	0	0	0	0	0.7368	0	3.537	3.2681	2.8775
Negative	1.8499	125.023	1.8499_125.0231	0	0	3.996	4.2598	2.1963	1.6526	0	0	0	0	3.0228	2.2678	2.9383	3.1943	1.1392	0	0	0	0	0	0	0	0	0	0	0	0	0	0	0	0	0	0	0	0	0	0	0	0	0
Negative	0.3847	125.874	0.3847_125.8735	1.8326	1.6256	2.0506	1.9033	1.4346	2.0664	2.3503	1.9552	2.2931	0.8153	0	1.7682	0	0	0	2.0056	1.5024	0	0	0	2.3546	1.7752	2.5352	2.7249	1.6849	1.904	0.8352	1.3378	1.1128	0.8624	0	1.925	2.98	2.4036	2.2187	1.699	1.2043	1.3158	1.4875	0
Negative	0.4809	127.051	0.4809_127.0511	5.5368	1.6163	5.1167	4.6092	5.6498	0.5413	3.1877	1.7586	0.8744	0.5225	3.7713	18.3304	2.1887	3.4513	3.3928	1.3837	0.9962	0.5808	0.5734	0	2.6638	2.0863	2.768	2.0419	3.8269	3.5856	0	0	0	1.8661	1.6666	1.1089	2.4182	0.6539	3.3847	1.4062	0.7761	0.4443	0.849	0.9179
Negative	3.1486	127.076	3.1486_127.076	0	0	0	0	0	0.7142	1.09	0.7532	0.9454	0.843	0	0	0	0	0	0.758	1.5564	0	1.6425	0.6689	0	0	0	0	0	0.4444	0	0	1.6055	0.9924	0	0	0	0	0	1.6768	1.3628	0	2.5361	0.9824
Negative	0.7068	128.035	0.7068_128.035	0	0	0	4.4181	0	2.1857	9.3401	39.6042	8.0008	1.8702	1.712	6.1358	0	0	2.4634	5.0406	1.8905	3.844	17.9685	17.8596	0	1.7093	0	0	0	4.5764	4.0274	1.2947	0	6.0464	0	1.0101	0	1.5323	1.8735	13.5041	13.136	3.4029	2.22	23.4473
Negative	0.495	128.035	0.495_128.0354	11.3558	9.387	17.477	8.6705	8.4616	1.6338	5.7586	19.536	3.6774	1.1515	5.9856	8.2958	6.0224	9.5175	3.3775	0	2.3429	1.8142	6.8445	5.1601	9.0785	8.4403	9.0269	6.8604	13.9414	3.722	1.6539	1.036	1.3525	2.65	7.0005	6.2673	14.6951	9.3867	12.6345	5.983	3.6656	0	3.2962	9.5387
Negative	0.4534	128.959	0.4534_128.9589	34.4707	43.1988	64.9376	35.3394	33.714	1.7209	0	0	5.2825	0	36.3529	12.0997	26.2395	34.6547	15.6579	0	0	0	0	0	28.2961	26.7079	31.4671	36.1062	30.8716	7.2748	4.6613	3.354	4.3313	3.6647	16.4212	16.5296	18.1102	23.1511	17.6058	0	0	0	0	0
Negative	0.7796	129.018	0.7796_129.018	19.6537	43.1031	48.236	21.531	21.7856	33.1694	11.83	17.5026	44.9346	53.1899	31.0366	29.3833	28.8185	25.0419	20.7596	13.317	28.0682	19.1827	27.2823	29.2816	33.4442	37.1646	35.2847	21.0659	27.6649	14.434	16.2388	10.5029	12.6052	17.2608	40.0946	30.1527	35.8167	47.1589	21.6958	44.6434	43.1792	49.0329	36.4644	48.3254
Negative	0.6765	129.02	0.6765_129.0201	5.2279	43.1031	9.0568	9.8547	7.1727	15.2492	7.8659	0	20.3336	18.6531	8.1793	29.3833	8.2421	7.86	6.2547	11.6404	10.105	14.9832	26.4035	29.1955	33.4442	11.8289	8.3212	21.0659	8.1257	12.902	16.7713	12.8618	12.4872	17.2608	8.7573	8.4648	5.3238	9.068	6.7033	18.3278	5.5812	15.5831	9.2765	23.065
Negative	0.5117	129.02	0.5117_129.0199	16.5291	12.435	14.6798	13.2886	17.621	31.0062	9.2341	12.1096	49.3031	39.5829	11.4007	16.5802	14.6546	20.1864	18.6164	7.7425	20.324	9.5555	24.0918	17.4216	13.9521	13.6497	12.3484	15.6601	18.1234	8.3757	16.7421	12.8618	14.144	8.1781	9.7631	12.137	28.7885	13.1003	22.3273	56.4068	40.8007	41.6509	45.6603	48.0926
Negative	0.9349	129.02	0.9349_129.0205	1.1528	2.6342	2.5265	2.2417	0	2.3629	0.9709	1.0378	0	0	0.8624	1.2964	1.426	1.2762	1.1174	0	1.8336	1.5152	1.6248	0	1.8508	1.885	0	1.63	1.4609	1.0976	0	0.6205	0.7672	1.2791	2.4641	1.825	1.3648	0	1.1922	0	0	4.2353	3.0413	0
Negative	2.4604	130.087	2.4604_130.087	0	0	0	0	0	0.5125	1.2062	1.2091	0	0	0	0	0	0	0	3.8636	1.6049	1.1293	1.3949	0.4378	0	0	0	0	0	2.0125	0.6364	0	0	1.0794	0	0	0	0	0	0	0.8038	0	0	0.6151
Negative	0.4392	130.969	0.4392_130.9688	5.4219	5.183	6.4074	2.8053	4.515	8.1725	6.3175	6.7047	11.7	5.9316	7.9092	7.3586	8.645	9.7584	8.2828	4.6459	6.7215	5.2624	5.0454	4.8233	7.7863	6.7967	8.8439	8.4809	8.5643	5.3429	4.8288	5.0041	6.0492	4.5833	5.7701	7.8188	10.1332	7.5594	10.0844	9.0591	8.1847	4.8076	4.9232	3.7911
Negative	6.3028	598.279	6.3028_598.2788	0	0	0	0	0	0.2637	2.1248	0.9922	0.3974	0.4651	0	0	0	0	0	4.218	6.2901	3.8907	0.8524	1.2188	0	0	0	0	0	0.3617	0.5892	0.1056	0.7246	1.5128	0	0	0	0	0	1.7187	2.0687	1.9912	1.3602	4.0146
Negative	0.4565	600.778	0.4565_600.7778	0	0	0	0.2184	0.1299	0	0	0	0.0528	0	0	0	0.7902	0.2907	0.5766	0	0	0	0	0	1.2219	2.1244	0.5383	1.6387	2.0089	0	0	0	0	0	1.5262	2.7884	3.7687	2.41	3.2912	0	0	0	0	0
Negative	0.5057	601.112	0.5057_601.1124	0	1.6356	0	0	1.3865	0	0	0	0	0	4.433	0	8.85	6.62	0	0	0	0	0	0	8.7214	0	0	0	2.4476	0	0	0	0	0	8.3476	9.1	6.0832	14.6732	7.3095	0	0	0	0	0
Negative	2.6145	601.121	2.6145_601.1208	0	0	0	0	0	0	0	0.6455	0.6751	0	0	0	0	0	0	0.3668	0.3226	0.9094	2.2399	3.8806	0	0	0	0	0	0	0.488	0	0	0.1314	0	0	0.2491	0	0	0.3606	0.2353	0	0	0
Negative	0.6083	601.132	0.6083_601.1321	0.6039	1.1516	0	0.5906	0.857	1.6055	1.5345	0	2.3406	0	2.2391	0	2.7014	0	0	0	1.7513	2.1404	1.6581	3.3908	0	2.5517	3.3104	0	0	0	0	3.6754	5.5209	0.8096	0	0	0	0	0	17.7086	21.595	7.3661	0	2.8199
Negative	0.7208	601.133	0.7208_601.1331	0	0	0	0	0	0.5489	0.6965	0.4517	0.7029	0.8569	0	0	0	0	0	0.326	0	0.6534	0.5444	1.415	0	0	0	0	0	0.2776	0	0.9068	1.3469	0.4398	1.1512	0.7071	0.3753	0	0	3.4647	0	0	0	0
Negative	0.5233	601.136	0.5233_601.1357	1.7449	1.6356	2.1723	1.3904	2.1707	0	0	0	0.2516	0	4.433	3.6277	8.85	6.62	0	0	0.2427	0	0	0	0	2.8187	11.9728	5.9273	2.4476	0	0	0.3156	5.5209	0	8.3476	10.1635	8.5989	14.6732	7.3095	17.7086	0	0	0	0
Negative	0.6105	601.171	0.6105_601.1709	0	0	0	0	0	0	0	0	2.3406	0	0	1.3544	0	0	0	0	0	0	0	0	0	0	0	0	0	0	4.7306	0	0	0	0	0	0	0	0	0	0	0	10.5996	0
Negative	3.2568	601.178	3.2568_601.1777	0	0	0.8684	0	1.7914	0	0	0	0	0	2.5308	0	6.2162	0	1.1259	0	0	0	0	0	0	1.1407	1.1357	1.1947	0.853	0	0	0	0	0	8.3343	7.507	11.8518	6.4128	8.2072	8.8769	2.9971	0	2.4266	0
Negative	8.3808	601.324	8.3808_601.3236	0	0	0	0	0	1.5946	2.148	1.7071	1.7776	0.6973	0	0	0	0.3672	0	6.5981	3.1634	1.5019	1.0629	0.8424	0	0	0	0	0	1.2927	1.2142	1.254	0.8477	1.4562	0	0	0.4807	0	0	1.6986	1.523	1.4845	1.812	1.2394
Negative	5.8466	603.974	5.8466_603.9739	0	0	0	0	0	2.3607	2.187	1.7081	1.7365	2.2939	0	0	0	0	0	0	0	0	0.1471	0.0469	0	0	0	0	0	0	0.0828	0	0	0	0	0	0	0	0	0.3373	0.3728	0.5225	0	0.3511
Negative	1.0849	605.154	1.0849_605.1545	1.5068	0.8401	0	1.1015	1.4284	0	0.4816	0	0.7962	0.3883	0	2.3115	1.5866	0.9179	2.9387	1.3554	3.3099	2.4641	0.9125	0.8791	2.1929	4.4569	1.2507	1.9263	2.3653	1.6412	1.2323	4.0083	2.9816	2.8765	1.7543	1.0238	1.0822	0	2.1659	0	1.2624	1.0534	0.5937	0.7236
Negative	0.5087	605.197	0.5087_605.1974	3.4994	2.3887	2.6963	1.2565	2.5279	0	0	0.3567	0	0	0.651	2.6879	1.5123	1.4096	2.83	0	0	0	0	0	0	2.8254	1.9567	3.3412	2.3943	0.2271	0.2829	0.4383	0.5374	0.2062	1.4655	1.9246	4.1298	2.7866	4.9253	0.6531	0	0	0.2521	0
Negative	4.7953	605.316	4.7953_605.3159	0	0	0	0	0	4.0447	4.1975	4.7881	3.1959	4.5582	0	0	0	0	0	3.5935	3.821	5.8982	2.715	3.9047	0	0	0	0	0	3.5545	3.3426	4.039	3.5366	6.3145	0	0	0	0	0	2.1799	2.9202	4.1507	6.3084	5.2105
Negative	5.0523	605.317	5.0523_605.317	0	0	0	0	0	4.6015	5.5831	0	3.453	0	0	0	0	0	0	5.1607	0	3.347	0	0	0	0	0	0	0	7.337	6.3523	10.8029	8.7771	10.1604	0	0	0	0	0	0	0	1.6837	1.7631	1.4969
Negative	4.9427	605.318	4.9427_605.3176	0	0	0	0	0	3.0989	2.3034	0	2.257	0	0	0	0	0	0	2.8069	0	4.4879	0	2.2255	0	0	0	0	0	2.7806	2.6725	3.0366	2.8761	3.2547	0	0	0	0	0	0	0	2.7201	4.689	3.3885
Negative	3.5681	131.071	3.5681_131.0706	0	0	0	0	0	2.3273	1.1067	0	0	1.6996	0	0	0	0	0	5.0631	3.0563	4.6641	3.0389	3.2402	0	0	0	0	0	0	0	0	0	0	0	0	0	0	0	0	0	0	0.2432	0
Negative	3.7209	131.071	3.7209_131.071	4.2843	4.5177	7.4819	7.4545	4.6453	8.0204	4.6744	5.3651	4.9267	6.3451	9.5783	4.4842	5.3029	8.7337	6.6798	16.4044	9.0495	13.096	10.477	10.3839	0	0	0	0	0	0	0	0	0	0	0	0	0	0	0	0	0	0.769	0	0
Negative	0.4773	131.075	0.4773_131.0746	0.7362	0.5646	0.3254	0.528	0.357	0	1.3386	0.6271	0	0	0	5.435	0	0.3094	0.3538	0.1756	0	0	0	0	0	0	0	0.585	0.2568	1.5895	0	0.1474	0	0.4352	0	0	0	0	0	0	0.5108	0	0	0.5251
Negative	0.4826	132.03	0.4826_132.0296	8.9504	8.5159	13.131	6.0164	8.3543	2.124	1.0215	1.1826	3.7465	1.5942	14.6886	9.4769	14.1847	18.0102	4.2961	0.1981	2.2244	0.5655	1.5189	0.5126	13.9919	11.4247	18.8481	9.6937	17.665	1.8236	0.621	0.6527	0.7588	0.9369	8.1108	9.4183	35.4075	11.0058	13.9979	2.1636	2.1067	1.1923	1.7964	2.5798
Negative	0.6133	133.014	0.6133_133.0136	0	37.9248	51.2029	0	14.8102	147.885	68.8716	40.8471	60.9801	135.151	0	24.8457	46.1984	0	2.7203	158.842	0	42.0852	143.239	165.406	22.7583	45.009	60.1038	0	25.3972	160.563	37.5808	31.0123	26.4405	170.119	24.691	13.6949	10.6348	0	0	26.2694	66.0306	46.4883	29.6722	140.513
Negative	2.1706	133.015	2.1706_133.0146	0	0	0	0	0.4858	0	0	0	0	0	0	0	0	0	0	1.7478	0	0	0.6564	1.2839	0	0	0	0	0	0.3233	0.8523	0	0.339	0	0	0	0	0	0	0	0	0	0	0
Negative	0.5207	133.015	0.5207_133.0149	62.8042	59.6203	95.2735	63.3653	53.2279	181.403	93.7074	86.7686	157.732	177.844	63.2432	83.0277	55.1575	61.9345	81.2954	220.102	98.6991	80.2893	170.18	221.401	60.444	77.8322	87.8008	88.2168	53.6779	243.376	83.6317	70.5247	62.7498	271.672	53.6776	49.9766	58.6199	60.2002	42.157	88.6671	131.17	89.7645	88.9428	147.975
Negative	0.8946	133.015	0.8946_133.0151	0	0	0	0	0	0	0	0	1.3183	2.4617	0	1.2134	0	0	0	2.9589	1.2639	2.4992	0	4.1718	0	0	1.5525	0	0	3.4748	0	0	0	9.2498	0	0	0	0	0	0.9954	2.9106	2.248	0	2.8082
Negative	1.1479	133.015	1.1479_133.0151	0.5887	0	0.6412	0.687	0.2975	0	0	0	0.7628	1.9394	0	1.9321	0	0	0	0	2.4227	1.8622	0	0	0	0.2933	0	0	0	0	0	0	0	0	0	0	0	0	0	0	2.1973	2.423	1.6675	0
Negative	0.7236	133.015	0.7236_133.0151	0	0	0	0	1.3529	0	19.5534	0	0	0	0	0	3.0709	0	0	42.8323	0	0	0	2.0015	0	0	3.5228	0	0	0	1.9897	17.7496	18.488	9.1485	1.6063	0	0	1.5546	0	0	45.812	0	0	0
Negative	1.0051	133.016	1.0051_133.0155	0	0.456	0.5301	0.7467	0	1.2182	0	0	0	2.1342	0	0	0	0	0	0.8378	0	2.1874	0	0	0	0.6726	0.7983	0.8834	0.527	0	0	0	0	0	0.7771	0	0	0.3883	0	0	2.5945	2.248	1.4142	0
Negative	1.522	133.029	1.522_133.0294	2.6749	0	0	3.3997	2.2182	0	0	0	0	0	0	0	0	0	2.1666	0	0	0	0	0	4.0574	1.7577	2.8946	2.7147	4.8992	0	0	0	0	0	0	0	0	0	0	0	0	0	0	0
Negative	0.8379	133.048	0.8379_133.048	0	1.4768	0	0	0	0.7122	1.5404	0	0.5613	0	0	0	0	0	0	0	0.9107	1.5155	0	1.7042	0	2.189	0	1.2117	1.333	1.6503	1.2865	3.3036	1.6953	2.3151	1.2168	0	0	0	0.6243	0.4944	0.8652	0	0	1.0559
Negative	0.9453	133.049	0.9453_133.0491	5.1911	8.1661	13.7372	8.4368	4.2884	4.2105	7.2347	4.5782	4.8236	6.1784	3.3828	1.5691	3.7099	1.8784	0	0	4.6938	5.1593	2.9016	3.1399	0	0	0	0	0	0	0	0	0	0	0	0	0	0	0	0	0	0	0	0
Negative	3.8367	134.023	3.8367_134.0231	0	0	0	0	0	0	2.7046	0	0	0	0	0	0	0	0	0	2.5026	0.9503	0	2.3034	0	0	0	0	0	2.4935	0.7899	0	0	0	0	0	0	0	0	0	0	0	1.4488	0
Negative	5.8688	605.973	5.8688_605.9735	0	0	0	0	0	1.9995	2.1919	1.3771	1.8034	2.814	0	0	0	0	0	0	0.17	0	0.1471	0	0	0	0	0	0	0.4274	0	0	0	0.1985	0	0	0	0	0	0.3666	0.8758	1.2304	1.573	0.5239
Negative	7.575	606.073	7.575_606.0726	0	0	0	0	0.0519	0	0	0	0	2.6262	0	0	0	0	0	0	0	0	0	0	0	0	0	0	0	0	0	0	0	0.3046	0	0	0	0	0	0	0	0	0	1.5029
Negative	2.5226	607.131	2.5226_607.1314	0	0	0	0	2.7606	0	0	0	0	0	0	3.1025	0	0	0	0	0	0	0	0	0	0	0	0	0	0	0	0	0	0	0	0	0	0	0	0	0	0	0	0
Negative	2.2101	607.133	2.2101_607.1333	0	3.141	0	0	1.8686	2.1752	2.414	2.218	2.3605	1.8074	5.6613	2.5926	2.4812	3.6747	4.5937	2.9658	4.9102	2.9571	4.6425	3.8686	11.5927	8.9613	7.2926	7.5918	12.1346	4.8298	6.0883	6.2751	6.4979	4.6629	3.9612	5.093	5.2434	0	5.1423	5.7876	5.9584	2.6599	2.8988	4.0463
Negative	2.5732	607.161	2.5732_607.1612	0	0	0	0	0	0	0	0	0	0	0	3.1025	0	0	1.0386	0	0	0	0	0	0	0	0	0	0	0	0	0	0	0	6.239	6.2405	6.6394	6.9333	6.5476	0	0	0	0	0
Negative	3.1562	607.165	3.1562_607.1647	58.5927	54.2079	89.3717	67.8038	50.4848	29.0357	26.6067	27.5172	22.2996	27.4143	76.073	71.9675	74.1705	75.4301	53.1924	26.7309	35.8208	19.7031	30.2578	16.5168	99.9783	84.7831	75.6817	67.1898	84.8164	21.7224	30.2105	30.8775	28.9339	24.7115	115.895	105.143	104.669	125.682	86.7417	89.5341	63.7132	52.7036	46.0605	29.9595
Negative	1.4784	607.165	1.4784_607.1648	6.2972	4.558	3.4897	5.0869	5.2832	0	0	0	0	0	5.509	2.2608	9.3288	1.8681	3.4562	0	0	0	0	0	10.2631	13.211	8.1871	9.2673	11.5052	0	0	0	0	0	0.8632	0	0	0.5015	0	0	0	0	0	0
Negative	3.0817	607.167	3.0817_607.1665	0	0	0	0	0	5.9035	26.6067	27.5172	0	27.4143	0	0	0	0	0	5.5182	35.8208	19.7031	4.6774	16.5168	0	0	0	0	0	21.7224	30.2105	30.8775	28.9339	4.7001	0	0	0	0	0	15.4178	13.4245	52.6492	8.9687	7.0353
Negative	2.9019	607.167	2.9019_607.1669	0	0	0	0	0	5.9035	4.23	5.2871	3.7671	5.1127	0	0	0	0	0	3.4964	6.4259	5.8561	5.7633	4.2142	0	0	0	0	0	0	6.0592	6.8711	7.3853	4.6117	0	0	0	0	0	15.4178	13.4245	14.233	10.8929	6.9847
Negative	2.0869	607.167	2.0869_607.1674	0	0	0	0	0	0	0	0	0	0	0	0	0	0	0	0	0	0	0	0	0	0	0	0	0	0	0	0	0	0	5.7938	6.1495	4.8019	5.8018	6.4261	0	0	0	2.6666	2.6629
Negative	2.7933	607.17	2.7933_607.17	0	0	0	0	0	0.1005	0	0	2.2394	0	0	0	0	0	0	1.2964	0	1.2108	0	0	0	0	0	0	0	0	0	0	0	0	0	0	0	0	0	11.3896	0	0	0	2.2591
Negative	1.4715	607.188	1.4715_607.1876	6.2972	4.558	0	5.0869	5.2832	2.5723	0	0	2.833	2.1149	0	2.2608	9.3288	3.1306	3.4562	3.5573	0	0	0	0	10.2631	13.211	8.1871	9.2673	13.2799	2.1081	4.4695	3.1607	3.6273	1.7093	0.8632	0	0	0.5015	0	0	0	0	0	0
Negative	4.8606	607.331	4.8606_607.3309	0	0	0	0	0	8.535	10.4826	6.1876	6.7447	6.8082	0	0	0	0	0	16.9837	4.6325	9.1301	3.3444	4.3257	0	0	0	0	0	9.9071	16.0356	25.0789	24.5486	18.8384	0	0	0	0	0	2.615	0	4.8033	0	5.5747
Negative	4.9671	607.332	4.9671_607.3323	0	0	0	0	0	1.84	1.7931	1.4948	1.7006	1.441	0	6.7621	0	0	0	3.3697	2.7365	4.232	1.9041	2.567	0	0	0	0	0	3.6491	3.9412	5.6819	4.3907	4.32	0	0	0	0	0	2.7074	3.1541	4.696	7.3921	5.6764
Negative	4.6868	607.333	4.6868_607.3326	0	0	0	0	0	5.0929	5.563	5.2231	3.8826	5.536	0	0	0	0	2.3507	5.4862	4.8685	7.2902	3.3444	5.4059	0	0	0	0	0	3.8861	6.733	7.6709	9.1065	8.2341	0	0	0	0	0	4.8705	7.098	7.4337	10.608	7.5863
Negative	2.5066	609.144	2.5066_609.1435	0	48.4094	0	46.2108	64.9468	7.7609	0	0	11.2267	7.1145	0	80.5244	0	0	76.6845	8.2139	20.0576	21.0349	23.051	26.4152	8.6423	7.7039	0	6.6212	11.7081	0	0	2.7053	0	0	3.2512	0	0	0	12.9477	7.5205	0	4.6582	0	0
Negative	3.0838	134.023	3.0838_134.0232	0	0	0	0	0	0	20.23	17.4718	11.0261	14.0367	0	0	0	0	0	19.2404	19.2431	14.1784	10.1795	7.9208	0	0	0	0	0	21.1556	0	12.1791	0	0	0	0	0	0	0	37.8256	24.2762	18.6799	18.3606	0
Negative	3.7393	134.024	3.7393_134.0236	0	0	0	0	0	2.2882	4.0418	1.0643	0	0	0	0	0	0	0	0	2.5026	0	0	0	0	0	0	0	0	0	1.9967	0	0	0	0	0	0	0	0	0	0	0	0	2.2448
Negative	6.149	134.024	6.149_134.0236	0	0	0	0	0	0	0	0	0	1.5362	0	0	0	0	0	0	0	0	0	0	0	0	0	0	0	0	0	0	0	2.2858	0	0	0	0	0	0	0	0	0	0
Negative	3.9332	134.024	3.9332_134.0237	0	0	0	0	0	0	0	0	2.5842	0	0	0	0	0	0	0	0	0	0	2.1208	0	0	0	0	0	0	2.4887	0	0	0	0	0	0	0	0	0	0	0	0	0
Negative	3.3316	134.024	3.3316_134.0237	0.9628	0.8941	0	1.2881	0	19.2182	22.5199	19.1384	13.726	8.0001	1.3391	0.9908	1.1401	0	0	21.4245	20.9136	18.2182	14.1202	6.0558	1.4801	1.2894	1.316	1.1302	0	24.6675	18.1038	15.5984	9.7639	11.3061	1.2067	1.2067	0.9983	1.4354	1.6558	33.7083	15.446	21.3673	18.154	7.3323
Negative	4.7423	134.024	4.7423_134.0238	0	0	0	0	0	0	0	0	0	0	0	0	0	0	0	0	0	2.707	0	0	0	0	0	0	0	0	0	0	0	0	0	0	0	0	0	0	0	3.6265	0	0
Negative	5.7941	134.024	5.7941_134.0238	0	0	0	0	0	0	0.3656	0	0	1.0602	0	0	0	0	0	0	0	0	0	1.389	0	0	0	0	0	0	0	0	1.7412	0	0	0	0	0	0	0	0	0	0	0
Negative	3.4265	134.024	3.4265_134.0238	0	0	0.7649	0.4985	0	16.894	19.5585	15.9201	13.9825	6.8386	0	0.7524	1.1211	0	0.5425	16.349	17.221	14.0486	12.747	5.023	0	0	0.8616	0.8191	0.7957	15.0986	13.8985	12.7201	6.8882	9.348	0.9153	0	0	0.8931	0	22.7982	13.3065	13.6561	15.107	7.7801
Negative	3.6077	134.024	3.6077_134.024	0	0	0.5443	0	0	1.7803	2.5397	0	5.5634	0	0	0	0	0	0	1.6767	1.4546	0.8927	0	2.5299	0	0	0	0	0.5512	1.4644	1.6766	0	2.3391	0	0	0	0	0	0.861	0	1.6636	0	2.7497	0
Negative	4.2841	134.024	4.2841_134.0241	0	0	0	0	0	0	0	0	0	2.4983	0	0	0	0	0	0	0	0	0.8595	0	0	0	0	0	0	0	0	0.4268	0	2.5737	0	0	0	0	0	0	2.8252	0	0	0
Negative	5.183	134.024	5.183_134.0241	0	0	0	0	0	1.2662	0	2.4092	2.5733	0	0	0	0	0	0	0.5204	0	0	2.0473	0	0	0	0	0	0	0.3852	0	2.0781	0	0	0	0	0	0	0	0	0	0	0	1.7851
Negative	4.4921	134.024	4.4921_134.0241	0	0	0	0	0	0	0	0	0	0	0	0	0	0	0	0	0	2.2238	0	1.4155	0	0	0	0	0	0	0	0	0	2.9502	0	0	0	0	0	0	2.2318	0	0	0.3665
Negative	4.0364	134.024	4.0364_134.0242	0	0	0	0	0	1.7613	0	1.9333	0	0	0	0	0	0	0	0	0	0	0	0	0	0	0	0	0	0	0	0	3.6113	0	0	0	0	0	0	0	2.2002	0	0	0
Negative	5.5686	134.024	5.5686_134.0243	0	0	0	0	0	0	0	0	0	0	0	0	0	0	0	0	0	0	0	1.6342	0	0	0	0	0	0	0	0	2.0834	0	0	0	0	0	0	0	0	0	0	0
Negative	5.8506	134.024	5.8506_134.0245	0	0	0	0	0	0.339	0	0	0	1.7739	0	0	0	0	0	0	0	0	0	1.4424	0	0	0	0	0	0	0	0	1.7889	0	0	0	0	0	0	0	0	0	0	0
Negative	0.3843	134.024	0.3843_134.0245	0	0	0	0	0	0.8156	0.8845	0	1.9817	0	0	0	0	0	0	1.5046	0	0.5375	1.1173	1.2716	0	0	0	0	0	0	0.8203	0.9905	0	0.797	0	0	0	0	0	0	0.5264	0.7425	1.0626	1.6368
Negative	2.2083	609.144	2.2083_609.1439	63.11	52.4223	39.2367	48.9527	76.3312	3.5878	3.4088	7.3253	3.8911	1.7863	90.0795	81.1081	94.9726	79.1673	95.2134	2.0191	3.5362	2.1274	0	0	52.419	48.1502	58.2682	53.2502	84.1127	9.3436	2.7708	24.6573	27.1102	11.6695	65.9455	67.8354	73.4764	57.3294	86.9908	0	5.7548	2.4658	2.4991	0
Negative	2.1446	609.144	2.1446_609.144	0	0	0	0	0	38.3565	24.4392	32.4386	37.297	22.7445	0	0	0	0	0	30.5971	39.3128	40.6972	48.2991	42.2118	0	0	0	0	0	22.9394	30.5064	24.6573	27.7828	17.3643	0	0	0	0	0	36.9929	37.8809	35.9475	49.2044	38.0911
Negative	2.7468	609.145	2.7468_609.1454	0	0	0	0	3.6156	1.8294	0	0	0	0	0	0	0	0	0	0	0	4.1066	0	4.6436	0	0	0	0	0	0	12.1154	6.4496	14.1657	0	0	0	0	0	0	5.7398	0	3.1907	0	2.2822
Negative	1.8656	609.145	1.8656_609.1455	0	0	0	0	0	0	0	0	0.2488	0.2248	0	0	0	0	0	0	0	1.8223	0	0	0	0	0	0	0	0	0	0	0.6712	0	0	0	0	0	0	0.6655	0	0	1.9373	0
Negative	1.9985	609.146	1.9985_609.1459	0	0	0	0	0	13.5681	10.6734	7.8851	14.5236	5.1068	0	0	0	0	0	5.91	10.3725	11.1518	6.5356	10.713	0	0	0	0	0	2.7667	6.0598	5.9393	7.0598	0	50.82	47.5151	48.2642	34.8433	59.4074	21.6937	19.8599	20.3145	27.0368	18.5916
Negative	2.8171	609.146	2.8171_609.1459	0	0	0	0	3.6156	0.4649	0	0	0	0	3.761	3.8706	0	0	0	0	0	1.4849	0	0	11.5743	0	10.892	0	15.6021	0	1.6789	0	2.042	0	9.9908	0	0	0	0	0	0	0	0	0
Negative	2.3177	609.148	2.3177_609.1478	0	0	0	0	0	0	1.4428	0	0	0	0	8.5296	0	0	0	0	0	0	0	0	0	0	0	0	5.3314	0	2.7708	0	2.909	0	6.8992	0	0	0	0	0	5.4497	0	2.4991	0.0818
Negative	0.5117	609.149	0.5117_609.1495	0.2605	0.6156	0.8747	0.6737	0	1.3214	1.7667	2.0831	2.1745	0.9715	0.3771	0.4636	0.2645	0.5422	0	0.7885	2.9729	3.2793	1.7826	2.3935	0	0	0	0.3706	0.5474	0.7797	0	2.1454	2.0562	0.8551	0	0	0	0.1928	1.0143	2.129	2.3852	1.7145	0	1.813
Negative	6.9272	609.268	6.9272_609.2676	0	0	0	0	0	0	0	0	0	0	0	0	0	0	0	0	0	0	3.4102	2.5999	0	0	0	0	0	0	0	0	0.2313	0.5747	0	0	0	0	0	0	0	0	0.3362	0
Negative	4.3623	609.279	4.3623_609.2795	1.0858	1.5319	1.3368	0	1.7233	2.9432	0	0	4.5333	3.0789	0.921	0	0	0	0.8092	0	4.2785	2.953	4.1985	5.7143	0	0	0	0	0	0	0	0	0.0772	0	0	0.7289	0	0.83	0.9246	1.3547	2.9833	3.5223	2.4483	0
Negative	4.1976	609.278	4.1976_609.2776	0	0	0	0	0.8582	1.2736	0	0	5.4859	3.4208	0	0	0	0	0	0	5.1726	3.109	0	1.3494	0	0	0	0	0	0	0	0	0	0	0	0	0	0	0	1.6241	2.0894	3.5223	2.364	0
Negative	4.5408	609.348	4.5408_609.3478	0	0	0	0	0	4.511	3.3684	4.5226	4.048	5.6898	0	0	0	0	0	3.6901	4.8279	6.9802	2.9474	6.1186	0	0	0	0	0	2.4328	4.4126	4.7405	6.9996	6.812	0	0	0	0	0	4.1622	5.7876	6.3755	8.1351	7.7088
Negative	0.6627	611.113	0.6627_611.1133	0	6.098	8.8243	2.6151	2.451	0	0	0	0	0	3.6301	0	3.738	4.0267	0	0	0	0	0	0	1.8293	0	0	0	2.8739	0	0	0	0	0	0	0	0	2.7206	1.6928	0	0	0	0	0
Negative	0.5263	611.135	0.5263_611.1354	3.9234	4.6683	4.3201	3.9454	3.0977	0	0	0	0	0	3.4724	2.1707	2.5965	3.9483	2.1133	0	0	0	0	0	1.8583	0	1.8678	1.8848	2.6669	0	0	0	0	0	2.2691	1.5981	3.1857	3.2049	2.5067	0	0	0	0	0
Negative	0.7054	611.14	0.7054_611.1402	0	6.098	8.8243	0	0	4.3834	7.535	4.0751	8.4043	5.6459	3.6301	3.5868	3.738	4.0267	0	0.7704	8.4747	5.8134	5.4555	5.7687	1.1927	3.6152	0	0	0	5.3841	2.8067	1.233	2.7263	6.2912	0	0	0	2.0148	0	6.9764	6.7358	8.4943	3.8451	3.9892
Negative	2.755	611.224	2.755_611.2242	0	2.5218	3.7913	0	1.1284	3.2129	15.9804	18.0678	1.8483	5.3372	0	0	0	0	1.3565	1.7103	2.2179	0	0	1.695	0	0	0	0	0	0	2.2119	0.889	2.0494	0	0	0	0.5104	0	0	1.416	0	0	2.5166	0
Negative	5.337	134.024	5.337_134.0245	0	0	0	0	0	0	0	0	2.4843	0	0	0	0	0	0	0	0	0	1.757	0	0	0	0	0	0	0	1.9879	1.9308	0	0	0	0	0	0	0	0	0	0	0	2.1381
Negative	4.1732	134.025	4.1732_134.0246	0	0	0	0	0	0	0	0	0	2.9956	0	0	0	0	0	0	0	0	1.0779	0	0	0	0	0	0	0	0	0	0	1.8816	0	0	0	0	0	0	2.4086	0	0	0
Negative	5.0171	134.025	5.0171_134.0246	0	0	0	0	0	0	1.9431	2.4147	0	0	0	0	0	0	0	0	0	0.7325	0	0	0	0	0	0	0	0	0	0	0	0	0	0	0	0	0	0	0	0	1.2209	0
Negative	4.8737	134.025	4.8737_134.0248	0	0	0	0	0	0	0	1.8776	0	0	0	0	0	0	0	1.0019	1.259	1.5435	0	0	0	0	0	0	0	0	0	0	0	0	0	0	0	0	0	0	0	0	2.7033	0
Negative	2.0976	134.037	2.0976_134.0372	1.4165	0.9484	0	1.3403	1.1427	0	0	0	0.848	0	3.4522	1.7731	4.1142	1.9739	2.9495	0	0	0	0	0	3.8174	4.2397	3.9707	5.1644	4.8183	0	2.1435	0	1.9854	0	0	0	0	0	0	0	0	0	1.0176	0.7606
Negative	2.4912	135.008	2.4912_135.0085	0	0	0	0	0	0	0	0.773	0	0	0	0	0	0	0	0	0	1.4259	3.1248	4.5471	0	0	0	0	0	0	1.314	0	0	0	0	0	0	0	0	0	0	0	0	0.6358
Negative	2.7252	135.009	2.7252_135.0088	0	0	0	0	0	0	0.3378	0	1.7366	0	0	0	0	0	0	0	0	1.8714	0	10.2067	0	0	0	0	0	0	1.9305	0	0	0	0	0	0	0	0	0	0	0	0	0.5171
Negative	0.504	135.03	0.504_135.0297	5.499	4.6421	5.8913	4.351	3.8165	6.1445	4.1256	4.9666	12.7946	4.2301	4.8613	8.2057	5.6426	4.5058	7.5046	17.4327	5.6928	16.6523	9.1758	13.6102	6.1676	5.8024	5.6618	8.7369	5.7679	11.0607	3.337	4.0832	4.63	7.8725	5.2714	5.7191	6.1571	3.384	5.2453	6.8553	29.9753	6.966	5.7365	4.4206
Negative	1.6782	135.045	1.6782_135.0449	0	1.0714	0	0	0	0	0	0	0	0	0	0	0	0	1.1704	0	0	0	0	0	10.9757	4.5112	10.2958	7.484	8.0005	0	0	0	0	0	12.8844	11.7877	9.8654	18.2157	13.7682	3.4603	0	4.6152	2.9628	0
Negative	2.592	135.045	2.592_135.0451	0	0	0	0	1.1963	0	0	0	0	0	0	2.3296	0	2.0561	4.727	0	0	0	0	0	12.967	16.2193	10.3203	14.9229	11.1773	3.0415	3.8769	3.5801	3.3378	3.1879	2.0139	3.9303	3.4396	0	4.7773	0	0	0	0	0
Negative	1.1607	135.047	1.1607_135.0474	1.6394	0	0	0	0	0.4858	3.3062	2.9788	0	0	1.9406	5.0555	0	0	2.0616	0	2.2419	0	0.8931	1.28	0	0	0	0	1.2373	0	0	0	0.7976	1.5435	0	0	0	0	0	0	0.382	0	0.7146	0.2928
Negative	1.8458	136.037	1.8458_136.0369	0	0	0	0	0	1.1196	3.8505	4.1142	0.9591	0.9178	0	5.841	0	0	0	1.2782	1.0371	0	0.9854	0.5439	0	0	0	0	0	0.5474	0	0	0	0	0	0	0	0	0	0	0	0	0	0
Negative	1.2977	136.04	1.2977_136.0399	0	0	1.0686	1.3105	0	0	2.1863	1.9536	0	0	2.8435	2.8916	1.8404	2.3865	3.1337	3.3478	0	2.2483	0	0	2.0306	1.4307	1.3207	1.7167	0	1.7202	0	0	0	2.9924	0	0	0	0	0	0	0	0	0	0
Negative	5.2311	137.006	5.2311_137.0061	0	0	0	0	0	0	0	0	0	0	0	0	0	0	0	2.9472	0	0	0	0	0	0	0	0	0	2.1746	0	0	0	0	0	0	0	0	0	0	0	0	0	0
Negative	2.8733	137.007	2.8733_137.007	0	0	0	0	0	0	0	0	0	0	0	0	0	0	0	0	2.9894	0	0	0	0	0	0	0	0	0	0	0	0	0	0	0	0	0	0	0	2.8532	0	0	0
Negative	4.6685	137.007	4.6685_137.0073	0	0	0	0	0	0	2.2582	1.3216	0	0	0	0	0	0	0	0	3.6534	0	0	0	0	0	0	0	0	0	0.5912	0	0	0	0	0	0	0	0	0	0	0	0	0
Negative	2.7824	611.253	2.7824_611.2527	3.0276	3.1868	6.0045	3.8658	1.4103	3.2129	15.9804	5.7579	2.5118	5.3372	0	4.0454	0	4.8157	3.8677	2.8777	4.4592	2.9516	2.0738	2.5949	0	5.371	0	0	0	7.6753	2.2119	1.5537	1.6906	8.7668	0	0	0	0	0.6302	2.2417	2.8524	4.4638	4.0544	7.3141
Negative	2.6983	611.258	2.6983_611.258	0	0	0	0	0	0	3.1009	2.7489	0	0	0	0	0	0	0	1.1729	0	1.559	0	0	0	0	0	0	0	2.0506	0.5924	0.5636	0	2.1911	0	0	0	0	0	0.5939	1.5723	1.8689	1.6942	2.4587
Negative	4.1448	611.291	4.1448_611.291	9.6795	26.8889	15.9734	13.4158	29.3534	2.7078	0	0.9465	15.1192	6.4874	38.94	9.7982	32.3189	27.4924	12.9849	0	6.3949	2.7273	6.2032	6.2386	6.1453	3.3462	0.4895	3.1512	19.1344	0	0.2811	0	0	0.5658	11.7221	4.5356	3.167	8.0186	5.7134	1.4723	1.6026	18.7438	3.136	22.6111
Negative	3.7552	613.141	3.7552_613.1413	0	0	0	0	0	0	0.5823	0.8154	0	0	0	0	3.3921	0	0	3.4696	2.7161	1.4235	2.5201	1.6633	0	0	0	0	0	0	6.2851	4.0883	4.6169	0	0	0	0	0	0	0	0.1434	0.2421	0	0.1661
Negative	4.4364	613.143	4.4364_613.1425	0.8887	0.4171	0.375	0.7942	1.1691	1.1718	0	0	0	0	0.9541	1.0489	3.178	1.4834	0.7893	0	2.2957	0	0	0	0	0.246	0	0	0	0	0	0	0	0	0	0.1914	0.3151	0	0	0	0	0	0	0
Negative	5.2716	613.157	5.2716_613.1571	0	0	0	0	0	1.6522	0	0	0	0	0	0	0	0	0	0	0	1.2107	1.1241	0.6995	0	0	0	0	0	1.1573	1.7943	0	1.2706	0	0	0	0	0	0	1.1414	0	2.0824	1.618	1.2288
Negative	5.1364	613.159	5.1364_613.1585	0	0	0	0	0	1.4458	1.0163	1.1797	1.0663	0.6732	0	0	0	0	0	0.905	1.2963	0	0	0.6938	0	0	0	0	0	1.3025	1.8619	1.17	1.3437	1.1602	0	0	0	0	0	1.075	0	2.0598	2.2147	1.4982
Negative	2.7047	615.127	2.7047_615.1272	0	0	0	0	0	0	0	0	0	0	4.071	0	0	4.977	0	0	0	0	0	0	0	0	0	0	0	0	0	0	0	0	0	0	0	0	0	0	0	0	0	0
Negative	3.0068	615.138	3.0068_615.1384	12.2636	9.4906	9.5274	11.5367	14.5133	8.3511	5.1473	7.2106	9.1681	7.7828	10.738	15.5685	10.6045	7.5701	14.4958	7.432	14.035	8.6476	7.9557	6.5807	12.5924	20.2509	9.8047	12.3862	10.9827	5.1559	8.6001	8.7841	13.1762	7.2635	5.6881	4.9453	9.5903	3.8842	6.2272	6.9157	9.7854	7.465	10.5377	9.8116
Negative	3.6965	615.228	3.6965_615.2283	0	0	0	0	0	1.9695	1.0811	1.6232	1.2924	0.9453	0	0	0	0	0	0	0.8642	1.5074	0.7699	1.4268	0	0	0	0	0	1.3431	4.1934	5.2211	4.7849	3.0553	0	0	0	0	0	0	2.9875	2.897	3.1914	3.7105
Negative	3.5701	615.229	3.5701_615.2291	0	0	0	0	0	0.7783	0	0	0	0	0	0	0	0	0	0	0	0	0	0	0	0	0	0	0	0	1.1948	1.905	1.8078	0.871	0	0	0	0	0	0	0.9553	0	0	1.1269
Negative	4.0915	616.031	4.0915_616.0309	0	0	0	0	0	1.0717	1.1546	0.623	1.238	0.5337	0	0	0	0	0	0	1.2556	0.6379	0	0	0	0	0	0	0	0.4752	0.5774	0.1192	0.451	0	0	0	0	0	0	4.4058	3.3439	2.606	1.9813	0.6883
Negative	0.4516	616.75	0.4516_616.75	1.4645	1.2171	1.6882	1.7473	1.728	0	0	0	0	0	1.6394	0.886	1.9735	1.3585	1.1835	0	0	0	0	0	3.1785	3.7026	2.3895	4.0332	4.3563	0	0	0	0	0	1.9446	2.4753	3.1696	2.7932	2.4484	0	0	0	0	0
Negative	3.1265	617.282	3.1265_617.2819	0	0	0	0	0	0	0	0	0	0	0	0	0	0	0	0	0	0	0	0	0	0	0	0	0	0	1.885	2.6522	2.2327	0	0	0	0	0	0	0	0	0	0	0
Negative	3.2925	617.28	3.2925_617.28	0	0	0	0	0	1.8464	0	2.2854	1.4452	0	0	4.7115	3.5101	0	5.0486	7.7928	4.3714	4.4671	3.2294	2.9855	8.8228	6.7799	8.5373	8.0339	8.2909	11.5892	12.4037	14.5149	14.6732	10.2939	5.1591	5.3164	5.4938	0	0	4.2986	4.9902	2.6467	4.0656	0
Negative	4.0708	618.032	4.0708_618.032	0	0	0	0	0	0	0	0	0	0	0	0	0	0	0	0	0	0	0	0	0	0	0	0	0	0	0	0	0	0	0	0	0	0	0	2.6557	2.0661	2.9493	1.8475	0
Negative	3.5945	137.009	3.5945_137.0089	0	0	0	0	0	2.2182	3.1324	0	0	0	0	0	0	0	0	0	0	0	0	0	0	0	0	0	0	1.1902	0	2.4426	0	0	0	0	0	0	0	0	0	0	0	0
Negative	3.9447	137.02	3.9447_137.0196	0	0	0	0	0	1.5862	0	0.7786	0.9275	0	3.8214	0	0	0.6731	0	3.3065	2.5246	3.1183	3.2631	3.0902	0	0	0	0	0	0.7169	2.0829	0	0	0	0	0	0	0	0	0	0	0	0	0.5791
Negative	1.8501	137.022	1.8501_137.0223	7.8409	4.7673	5.2951	7.5547	8.2904	4.0728	4.3517	0	4.207	1.8854	28.9067	12.0999	14.5901	13.8632	11.9183	22.0158	5.2324	12.5083	7.2103	6.6134	12.0191	6.2281	4.5814	7.8046	8.9886	2.845	2.6205	2.32	0	0	4.3791	4.7873	3.3854	0	8.5965	0	0	0	0	0
Negative	5.3573	137.019	5.3573_137.0195	0	0	0	0	0	0.9804	0	0	0	0	0	0	0	0	0	2.1329	0	1.9455	1.0718	0.9293	0	2.5605	0	0	0	0	3.1809	2.7395	0	0	0	0	0	0	0	0	2.3676	0	0	0
Negative	1.6216	137.02	1.6216_137.0205	0	0	0	0	0	1.2701	1.829	0	0.9001	0	0	0	0	0	0	5.3377	0	3.4114	0	0.8886	0	0	0	0	0	1.1921	0	2.094	0	0	0	0	0	0	0	0	0	0	0.5087	0
Negative	1.4711	137.021	1.4711_137.0208	0	0	0	0	0	0	0	0	0.5834	0	0	0	0	0	0	3.4494	0	2.6047	0	0.6623	0	0	0	0	0	0	0	0	0	0	0	0	0	0	0	0	0.9575	0	0	0.4446
Negative	1.7495	137.022	1.7495_137.0218	0	0	0	0	0	0	0	0	1.3701	0	0	0	0	0	0	7.2071	4.2264	3.9325	1.9855	1.7851	0	0	0	0	0	0	0	1.725	0	0	0	0	0	0	0	0	0	0	0	0
Negative	3.8276	137.023	3.8276_137.023	0	0	0	0	0	0	0	0.8126	0	0	0	0	0	0	0	0	0	2.0384	1.8224	1.4474	0	0	0	0	0	0.9605	0	0	0	0	0	0	0	0	0	0	0	0	0	0
Negative	0.9958	137.024	0.9958_137.0242	1.6385	1.4626	1.9685	2.0052	0.883	0	0	0	0	0	1.3552	1.72	1.9354	1.5931	0	0	0	0	0.6428	0	6.8833	4.2733	6.7893	5.2842	5.2327	0	0	0	0.9134	0	8.8636	5.2363	5.9139	6.5756	4.7383	3.3996	5.8263	5.2319	4.422	2.5998
Negative	2.9742	137.025	2.9742_137.0252	1.2547	0	0.9847	0	1.5719	0	0	0	0	0	2.8176	0	1.8802	0	0	0	0	0	0	0	4.163	2.7393	2.6161	2.5639	2.7398	0	0	0	0	0	0	0	0	0	0	0	0	0.2969	0	0
Negative	2.6179	137.026	2.6179_137.0257	0	0	0	0	0	0.7603	0	0	0	0	4.2727	0	0	0	3.599	0	0	0	0	0	0	0	0	0	0	0	0	0	0	0	0	0	0	0	0	0	0	0	0	0
Negative	1.7027	138.055	1.7027_138.0546	3.0365	3.0961	3.7805	5.2949	4.0193	0	0	0	0	0	0	0	0	0	0	0	0.5828	0	0.6714	0.4044	2.5499	0	0	0	2.5482	0	0	0	0	0	0	0	0	0	0	0	0	0	0	0
Negative	0.4866	138.921	0.4866_138.9213	0	0	0	0	0	2.0761	4.0245	6.4029	0.9997	2.3372	0	0	0	0	0	6.8643	2.231	2.2915	3.7555	3.4625	0	0	0	0	0	0.6583	2.1366	1.5923	0.8485	0.7529	0	0	0	0	0	0	0.8553	0.7159	0.8572	2.4049
Negative	1.7006	139.039	1.7006_139.0394	3.2693	0	3.7825	0	2.4227	2.5542	1.9682	2.3376	1.8446	1.2336	3.9129	4.177	3.505	4.9031	0	1.3924	0	0	0	0	0	0	2.6837	3.571	0	1.3988	0.8039	0.7514	0	0	0	0	0	1.983	1.3786	0	0	0	1.9537	0.6591
Negative	0.929	142.05	0.929_142.0499	0	0	0	0.3487	0	0.1789	1.1207	4.6341	0	0	0	0.9216	0	0	0.7683	1.0215	0.5589	0.829	1.7795	1.1583	0	0	0	0	0	3.9555	0	0	0	4.1398	0	0	0	0	0	3.1724	1.4966	0.1595	0.4214	0.936
Negative	0.7191	142.998	0.7191_142.998	0	0	0	0	2.6954	1.0018	2.3655	1.7511	1.5912	1.4345	3.7074	0	8.6117	7.1631	6.4141	0.4453	1.0894	1.4921	0.5657	1.1001	1.9259	1.9191	2.9801	3.132	3.0045	1.1497	1.7961	1.7802	2.6483	2.3497	2.7982	2.6421	4.1353	0	3.9598	1.2613	1.6799	1.5065	0.977	1.3343
Negative	4.2978	618.034	4.2978_618.0336	0	0	0	0	0	0	0	0	0	0	0	0	0	0	0	0	0	0	0	0	0	0	0	0	0	0	0	0	0	0	0	0	0	0	0	3.553	2.3366	3.2744	0	0
Negative	3.9837	618.044	3.9837_618.0439	0	0	0	0	0	0	0.9264	0	0	0	0	0	0	0	0	0	0	0	0	0	1.7297	0	0	0	0	0	0	0	0	0	0	0	0	0	0	3.3039	2.4047	0	0	0
Negative	3.7472	619.26	3.7472_619.2601	0	0	0	0	0	2.9797	2.2657	1.8408	2.4668	0	0	0	0	0	2.4791	6.9511	7.0613	6.6361	6.2865	6.4191	0	0	0	0	0	0	1.9614	1.6531	0	0	0	0	0	0	0	0	0	0	0	0
Negative	3.9037	619.258	3.9037_619.2581	0	0	0	0	0	1.3254	0	0	1.5798	1.1516	0	0	0	0	0	1.9153	2.0227	2.1876	0	3.9223	0	0	0	0	0	0	0	0	0	0	0	0	0	0	0	0.9684	1.9428	0	1.7925	3.5916
Negative	2.8382	619.259	2.8382_619.2593	0	0	0	0	0	0	0	0	0	0	0	0	0	0	0	0	0	0	0	0	0	0	0	0	0	1.2705	2.5572	2.438	3.5946	2.1132	0	0	0	0	0	0	1.5607	0	0	0
Negative	2.9299	619.26	2.9299_619.2604	0	0	0	0	0	0	0	1.0753	0	0	0	0	0	0	0	0	0	2.2777	0	2.1265	0	0	0	0	0	2.4204	3.9075	4.5462	5.8201	3.4465	0	0	0	0	0	0	1.9039	0	0	0.828
Negative	3.045	619.261	3.045_619.2608	0	0	0	0	0	0	0	1.6277	0	0	0	2.4795	0	0	0	0	0	3.2052	0	3.0687	0	0	0	0	0	2.023	8.7418	9.2571	10.3228	4.6591	5.6819	4.0756	5.4323	0	0	7.2685	7.5444	2.1335	6.2076	2.1777
Negative	3.1088	619.263	3.1088_619.2634	0.6262	0	0	0	0	0	0	0	0	0	1.2978	0	1.7458	1.3508	0	0	0	0	0	0	2.6559	1.7781	2.271	0	0.9683	0	0	0	0	0.2765	5.6819	4.0756	0	1.4738	0	0	0	0	0	0
Negative	5.4559	619.302	5.4559_619.3019	0	0	0	0	0	0	0	0	0	0	0	0	0	0	0	0	0	0	0	0	0	0	0	0	0	0	0	0	0	0	0	0	0	0	0	4.0724	0	0	3.3299	0
Negative	4.4128	620.047	4.4128_620.0465	0	0	0	0	0	1.5419	0	0	2.1343	1.0397	0	0	0	0	0	0	1.8101	0.7829	0	0.255	0	0	0	0	0	0	0	0	0	0	0	0	0	0	0	0	4.3445	0	0	0
Negative	1.9227	621.175	1.9227_621.175	16.5322	9.8802	9.9535	12.7465	10.7508	0	0	0	2.9722	0	10.6826	0	14.8208	0	1.228	0	0	0	0	0	0	12.0342	1.2408	2.3431	9.952	0	0	0	0	0	5.209	5.4464	4.5988	6.769	9.1301	0	0	0	2.3141	0
Negative	3.5709	621.188	3.5709_621.1875	0	0	0	0	0	0	0.4647	0.2961	0	0	0	0	0	0	0	1.643	2.6341	1.5017	2.3083	1.2701	0	0	0	0	0	0	0	0	0	0	0	0	0	0	0	0	0	0	0	0.9783
Negative	2.0619	621.199	2.0619_621.1994	9.5048	8.4314	6.289	8.2069	8.9165	5.2249	0	2.7641	0	4.3393	0	0	0	6.102	0	0	2.2608	0	0	0	0	8.3242	0	3.6834	0	0	0	0	1.889	0	1.9523	1.9	2.004	1.1682	0	0	0	0	0	0
Negative	1.8998	621.2	1.8998_621.1996	16.5322	9.8802	9.9535	14.1159	13.2004	7.8458	6.0244	6.5866	9.4767	6.0411	0	7.5569	14.8208	11.3893	9.2551	1.9996	8.0435	4.218	5.5727	4.0543	6.4316	13.1424	0	8.1525	9.952	2.8045	8.1246	5.396	7.032	3.6458	0	4.5363	4.5988	0.7896	9.1301	4.5773	0	0	2.7916	2.4238
Negative	1.7194	621.205	1.7194_621.2047	0	3.0448	0	0	0	2.9816	0	0	2.3041	0	0	0	0	0	0	0	0	0	0	0	0	4.8308	3.347	0	6.5183	0	2.5203	0	0	0	0	0	0	0	0	0	0	0	0	0
Negative	3.5774	621.207	3.5774_621.2071	0	0	0	0	0	0	0.9481	0	0	0	0	0	0	0	0	1.643	2.6341	1.5017	2.3083	1.2701	0	0	0	0	0	0	0	0	0	0	0	0	0	0	0	0	0	0	0	0
Negative	0.6413	143	0.6413_142.9996	2.7923	3.673	6.3338	3.4863	2.6954	5.3427	5.1316	0	2.5382	6.6203	3.7074	3.525	8.6117	7.1631	6.4141	0.4193	5.5372	4.0379	1.9218	1.8631	1.377	1.5444	2.6082	3.132	2.5112	2.4533	5.9207	6.1367	6.2975	3.1751	2.7982	2.6421	4.1353	4.0347	3.0329	0	0	5.8221	2.704	2.7323
Negative	0.5293	143	0.5293_142.9998	5.5442	6.5161	7.9024	4.3408	4.8655	10.8746	18.6775	13.3982	17.5221	13.9924	4.3122	3.2367	7.2607	5.0546	4.9443	4.8644	17.5746	11.894	8.5809	4.9072	3.8586	2.9732	3.5221	2.8376	4.7915	8.3139	13.6985	13.1661	16.4074	11.857	4.4975	4.2713	7.1868	5.5892	3.9541	6.8258	10.2693	13.2285	12.1848	5.3945
Negative	1.8666	143.033	1.8666_143.0328	0	0	0	0	0	0	0	0	2.1821	0	0	0	0	0	0	0	0	0	4.7498	3.9149	0	0	0	0	0	0	0	0	0	0	0	0	0	0	0	0	0	0	0	10.5787
Negative	1.298	143.034	1.298_143.0339	18.7854	24.5046	23.9458	38.0125	19.4519	15.4977	2.3041	13.4656	21.6503	19.3227	12.8697	12.5671	8.3477	10.5192	8.8182	4.9615	9.3395	7.6527	23.9323	15.6301	14.6181	14.5606	8.2846	12.7053	12.6022	1.8202	1.96	0	0	1.426	24.1751	17.777	13.1482	24.1973	19.0343	43.5145	32.5969	24.3371	30.2809	34.5253
Negative	1.7146	143.034	1.7146_143.0341	0	0	0	0	0	2.4872	0	4.4532	4.0838	0	0	0	0	0	0	0.5462	0.6144	1.7389	13.9688	9.5831	0	0	0	0	0	0.6002	1.9667	0	0	0	0	0	0	0	0	7.1212	6.5041	1.4276	0	0
Negative	1.1876	143.034	1.1876_143.0344	0	0	0	1.3933	0	2.618	0	6.252	6.2	3.9605	0	0	0	0	0	0	1.9824	2.8034	7.1013	9.1874	0	0	0	0	0	0.4394	1.1911	0	0	0.6368	0	0	0	0	0	16.3976	11.4628	6.3219	7.1237	16.4643
Negative	1.075	143.035	1.075_143.0348	0	0	0	0	0	1.9003	0	0	3.3053	2.3218	0	0	0	0	0	0.337	0	1.3784	1.9379	3.8755	0	0	0	0	0	0.3073	0.535	0	0	0	0	0	0	0	0	8.9276	4.6994	3.4487	4.3691	9.5002
Negative	1.6173	143.035	1.6173_143.0349	0	0	0	0	0	0.7423	0	1.4755	1.379	0	0	0	0	0	0	0	0	0	4.0366	2.0698	0	0	0	0	0	0	0	0	0	0	0	0	0	0	0	0	0	0	0	0
Negative	0.9751	143.036	0.9751_143.0356	0	0	0	0	0	0.8968	0	1.2006	2.2669	1.6402	0	0	0	0	0	0	0.6389	0.8582	0	3.1632	0	0	0	0	0	0	0.9177	0	0	0	0	0	0	0	0	6.97	4.6994	2.5035	2.1032	5.5677
Negative	0.8918	143.036	0.8918_143.0359	0	0	0	0	0	0	0	0.5293	2.5764	1.315	0	0	0	0	0	0	0.6409	0.9297	0	0	0	0	0	0	0	0.3326	0.5506	0	0	0.5197	0	0	0	0	0	0	4.3758	0.9713	0	4.7117
Negative	0.9506	144.046	0.9506_144.0463	0	0	0	0	0	0	0	0.2935	0	0	0	0	0	0	0	0	0	2.6922	0	3.3358	1.2032	1.3147	0	0	1.458	1.5692	1.3574	1.3416	1.7439	2.1886	0	0	0	0	0	0	0.7363	0	0	0
Negative	0.7042	145.014	0.7042_145.0142	0.4441	2.6005	3.201	0	0.5973	0.921	1.5618	1.6489	1.6962	1.6661	1.1713	0.6407	1.8384	1.2483	0.9469	0.979	1.4807	2.1063	0.9902	2.9549	0.7223	0.6853	0.7915	0.7201	0.7559	0	1.7233	1.1492	2.3826	1.4572	0	0	0	0.8595	0.7319	0.7834	1.4777	3.7823	0.6242	2.0423
Negative	0.5105	145.015	0.5105_145.0152	0	0	0	0	0	1.9384	4.115	2.8118	4.4681	2.8949	0	0	0	0	0	0	3.3657	3.1529	1.5563	2.5736	0	0	0.7815	0	0	1.1479	3.2504	2.7058	3.5356	1.7885	0	0	0.7398	0	0.6729	2.1037	2.4003	4.5817	2.8442	3.5328
Negative	2.0345	145.028	2.0345_145.0284	1.0232	0	0	0.7034	0	0	0	0	0	0	1.2825	1.0222	1.7956	0	0	0	0	0	0	0	3.8126	0.7729	4.7635	0.9394	2.441	0	0	0	0	0	0	0.9197	0	0	1.3665	0	0	0	0	0
Negative	0.4748	145.061	0.4748_145.0612	32.4225	9.6658	24.1379	24.9091	25.7286	2.4094	12.4727	6.2237	4.871	2.2281	16.6517	62.0178	6.6275	12.7769	16.31	5.7285	4.0129	0	3.3591	0	14.2905	10.0819	9.4692	10.0244	17.8283	16.8429	1.0202	1.4719	1.0708	9.5703	6.8647	6.4972	11.2556	2.9577	15.9276	6.3799	2.8645	2.2853	4.0458	4.1346
Negative	0.5522	145.062	0.5522_145.0616	0	0	0	0	0	1.8922	7.2077	3.8888	2.4906	1.7398	0	0	0	0	0	1.9636	3.1214	0	2.0603	1.308	0	0	0	0	0	9.2089	0	0	0	6.6799	0	0	0	0	0	0	1.6183	1.7116	2.3994	3.2469
Negative	3.9315	621.225	3.9315_621.2249	0	0	0	0	0	0	3.16	2.6437	1.0903	1.119	0	0	0	0	2.9852	4.1476	4.2951	1.3707	5.2692	0	0	0	0	0	0	1.1767	1.3862	0.9824	0	1.2057	0.8976	0	0.8762	0.6199	0	3.2245	4.0622	4.0863	4.6635	7.7465
Negative	3.9301	621.262	3.9301_621.262	0	0	0	0	0	0	3.16	0	0	0	0	0	0	0	0	0	0	0	0	3.8097	0	0	0	0	0	0	0	0	1.9701	2.4761	0	0	0	0	0	0	0	0	0	0
Negative	3.7299	621.27	3.7299_621.2703	0	0	0	0	0	1.7307	0	0	1.8277	0	0	0	0	0	0	0	0	0	0	0	0	0	0	0	0	0	1.423	1.7692	0	0	0	0	0	0	0	1.4833	2.1683	3.1732	2.7169	3.4766
Negative	4.1218	621.309	4.1218_621.3092	0	0	0	0	0	0	1.8726	2.8438	2.3957	2.2811	0	0	0	0	0	2.918	2.2781	3.5418	2.0884	4.5321	0	0	0	0	0	2.282	3.1312	0	4.3523	3.5566	0	0	0	0	0	0	0	0	0	3.8489
Negative	4.0155	621.31	4.0155_621.3102	0	0	0	0	0	2.6639	0	3.0969	2.5456	2.811	0	0	0	0	0	4.5035	3.585	3.5472	3.1736	4.204	0	0	0	0	0	2.1471	2.045	3.4722	3.5118	1.779	0	0	0	0	0	1.5177	0	0	2.7943	3.7959
Negative	1.7735	623.127	1.7735_623.1269	0	0	0	0	0	0.9278	2.7518	0	1.1412	0.1951	0	0	0	0	0	0	2.8304	1.5757	0	0	0	0	0	0	0	2.3326	2.659	3.4781	2.1663	2.1489	0	0	0	0	0	1.3982	1.3527	0.3867	0.7227	0
Negative	1.8581	623.127	1.8581_623.127	4.0587	2.6833	0	2.241	4.3605	2.3527	2.316	0	0	0	0	3.5424	0	0.7794	4.2484	0	0	0	0	0	8.5392	6.1139	4.39	3.5487	7.8715	0	0	0	0	0	4.8532	4.2237	3.9734	2.0382	4.8873	0	0	0	0	0
Negative	2.8693	623.161	2.8693_623.1608	0	0	0	0	0	0	0	0	0	0	0	0	0	0	0	2.6355	4.16	0	1.7076	3.6451	0	0	0	0	0	0	0	0	0	0	0	0	0	0	0	0	0	0	0	0
Negative	2.7116	623.161	2.7116_623.1611	23.9911	21.6759	25.4745	22.2401	27.124	6.7445	11.3125	9.276	8.1955	8.2635	0	36.9233	0	0	0	3.5928	6.8321	6.7291	7.5595	6.0867	16.5621	25.7661	12.6421	13.6746	23.0462	4.7764	6.0148	5.1838	9.3303	6.2697	0	0	0	0	5.6946	4.7892	4.9574	0	5.8592	3.8211
Negative	3.002	623.161	3.002_623.1611	18.3022	28.539	15.2994	28.7795	28.6659	3.5368	0	5.7688	3.9783	2.6468	37.8958	49.9098	36.8254	32.3535	41.4312	10.386	16.8367	15.8835	8.9187	12.9486	0	0	0	0	0	0	0	0	0	0	0	0	0	0	0	0	0	0	0	0.4326
Negative	2.0061	623.162	2.0061_623.1616	0	0	0	0	0	0	0	0	0	0	0	0	0	0	0	0	0	0	0	0	0	0	0	0	0	0	0	0	0	0	8.9542	8.0231	6.8176	7.1422	7.0346	4.6411	4.1861	5.5315	3.3677	2.9663
Negative	3.3111	623.162	3.3111_623.1618	0	0	0	0	5.0485	0	0	0	0	0	0	0	0	0	0	0	0	0	0	0	6.2019	4.6194	5.9967	4.7505	5.7209	0	0	0	0	0	0	0	0	0	0	0	0	0	0	0
Negative	5.3795	623.326	5.3795_623.3262	0	0	0	0	0	0	0	0	0	0	0	0	0	0	0	0	0	0	0	0	0	0	0	0	0	1.5011	3.3771	3.9851	2.7505	1.4562	0	0	0.3015	0	0	0	0	0.8599	1.285	0
Negative	3.9101	623.327	3.9101_623.3273	0	0	0	0	0	4.1378	4.2455	3.3448	0	3.229	0	2.5528	0	0	0	6.1339	0	3.5904	2.2487	3.42	0	0	0	0	0	3.2694	4.0784	6.5827	7.9385	5.7394	0	0	0	0	0	0	0	0	2.9625	2.452
Negative	3.7243	623.329	3.7243_623.329	0	0	0	0	0	1.7088	1.2967	1.8091	1.758	1.347	0	0	0	0	0	2.7331	2.0203	2.4292	2.0179	2.0306	0	0	0	0	0	1.9442	1.9798	1.9383	2.3376	1.8236	0	0	0	0	0	0	1.2068	1.7585	2.3545	3.1501
Negative	1.8939	625.118	1.8939_625.1184	40.9067	31.1121	10.1877	20.4257	44.2774	0	0	0	0	0	7.9249	22.8231	11.4501	0	22.1642	0	0	0	0	0	49.7667	40.4867	13.0005	0	24.1571	0	0	0	0	0	47.4705	50.9064	29.5613	23.9955	31.7508	0	0	0	0	0
Negative	0.4926	146.044	0.4926_146.0441	26.1017	18.538	43.8377	20.1863	21.5998	3.204	5.5756	6.2856	10.7087	2.7986	26.0564	13.4693	28.8286	34.2442	6.9232	0.9726	5.3055	3.1062	1.2365	2.3178	38.3646	23.7075	39.8264	20.7993	40.8276	4.539	3.3415	2.5032	3.2983	4.9224	27.2313	34.6729	67.6456	46.6224	65.5948	10.303	3.1971	3.281	8.041	6.2343
Negative	0.4442	146.961	0.4442_146.961	3.6144	2.1706	2.7156	1.3187	2.0068	5.2725	3.6745	3.0486	7.7113	4.8477	4.7539	3.1221	3.5045	4.9051	3.5609	3.1631	4.0012	3.645	2.9815	3.447	5.5931	3.5091	5.0423	3.4206	0	3.5424	2.6725	2.9409	4.3355	3.5178	3.1221	4.2835	4.5988	3.3866	5.4165	7.2528	5.5327	3.0604	3.1993	2.3611
Negative	0.7224	147.03	0.7224_147.0297	0	0	0	0	0	1.308	1.5689	1.8767	1.4138	1.8476	0	0	0	0	0	2.4349	0	1.4087	0	1.7057	0	0	0	0	0	0	1.8537	0.8898	1.4863	2.4007	0	0	0	0	0	2.9891	1.5142	1.3763	2.2363	1.0298
Negative	0.5116	147.03	0.5116_147.0302	16.6036	0	0	0	17.8067	3.1994	4.8365	4.6509	5.6716	3.136	16.9744	20.2186	14.9749	22.8307	19.3833	4.6998	5.6199	4.4344	4.8592	5.7871	19.3736	14.5326	15.1822	17.1268	20.1288	2.7968	4.0912	3.7876	4.5634	3.25	11.3901	13.8822	32.7204	14.3931	24.6351	8.2997	6.4328	3.0426	3.068	3.8639
Negative	0.6033	147.033	0.6033_147.0331	0	0	0	0	0	3.1994	4.8365	4.6509	0	3.136	0	0	0	0	0.6356	4.6998	0	4.4344	4.3583	4.6397	0	0	0	0	0	2.7968	4.0912	0	0	3.25	0	0	0	0.4946	0	0	0	3.0426	4.7195	3.8639
Negative	1.7495	147.045	1.7495_147.0451	1.2865	0.9887	1.5224	1.3571	1.1296	0	0	0	0	0	1.3846	0	2.0879	1.7767	0	0	0	0	0	0	0	0	2.0871	1.9263	0	0	0	0	0	0	4.526	2.5273	1.9466	3.1875	3.3327	0	0	2.208	0	0
Negative	4.7362	148.053	4.7362_148.0528	4.1086	3.3915	4.4565	5.8168	4.5164	1.0383	0	0	0	0	3.5669	2.8732	0	4.8391	2.6645	0	0	1.4863	0	0	0	4.14	0	0	4.0486	0	0	0	0	0.9968	6.6471	8.6494	6.3685	8.6665	9.6922	3.6314	3.4229	5.1777	4.1048	0
Negative	0.4857	148.95	0.4857_148.9499	0	0	0	0	0	5.1227	4.0275	7.7272	3.9682	4.999	0	0	0	0	0	11.5054	5.0375	4.9985	8.2325	7.2411	0	0	0	0	0	1.7474	4.2727	3.7237	3.6828	2.4274	0	0	0	0	0	0.848	2.5459	3.6363	2.4596	6.4584
Negative	0.4881	148.96	0.4881_148.9603	0	0	0	0	0	5.1227	4.0275	7.7272	3.9682	4.999	0	0	0	0	0	11.5054	5.0375	4.9985	8.2325	7.2411	0	0	0	0	0	1.7474	4.2727	3.7237	3.6828	2.4274	0	0	0	0	0	0.848	2.5459	3.6363	2.4596	6.4584
Negative	2.8065	149.012	2.8065_149.0117	0	5.0114	2.206	0	0	0	0	0	0	0	0	0	0	0	0	0	0	0	0	0	0	0	0	0	22.4096	0	0	0	0	0	0	0	0	0	0	0	0	0	0	0
Negative	3.9802	149.044	3.9802_149.0443	0	0	0	0	0	0.7176	0	0.7319	0.8447	0.7528	0	0	0	0	0	1.2376	0.8126	1.2916	0.8442	0.9839	0	0	0	0	0	1.2346	1.3645	0	1.6072	0.9801	0	0	0	0	0	1.3279	1.435	0	1.6175	1.6201
Negative	3.002	149.045	3.002_149.0451	0	0	0	0	0	0	0.8158	0	0	0	0	0	0	0	0	1.9058	2.0806	1.149	0	0	0	0	0	0	0	0	0.3732	0	0	0	0	0	0	0	0	0.4291	0	0.7114	0.4462	0
Negative	0.5188	149.046	0.5188_149.0464	11.5725	11.907	16.335	9.7842	8.3432	14.0992	30.1943	36.3206	22.5221	16.1832	9.2288	13.1348	10.8164	11.3919	17.638	9.1479	17.7847	16.0394	12.5279	22.697	4.6779	9.6226	3.4245	5.584	6.8361	12.7852	15.7109	13.1396	20.4899	15.8243	5.0114	6.6803	11.9452	6.0222	5.7516	7.9789	9.3228	13.3323	12.8177	21.5866
Negative	4.081	149.046	4.081_149.0464	0	0	0	0	0	0	0	1.0284	0	0	0	0	0	0	0	1.882	1.4656	1.728	0	1.881	0	0	0	0	0	1.7413	1.8893	1.7138	2.0767	0	0	0	0	0	0	2.0176	2.4941	0	2.1674	2.2904
Negative	0.609	149.047	0.609_149.0466	0	0	0	1.4614	0	0	16.7924	0	0	6.8924	1.1832	0	1.6214	0	0	0	0	6.2797	5.6831	0	0	0	0	0	0	0	0	0	0	5.2763	0	0	0	0.7692	0	1.8585	2.7419	0	0	4.7718
Negative	4.1984	149.061	4.1984_149.0612	0	0	0	0	0	0	0	0	0	0	0	0	0	0	0	0	0	0	0	0	0	0	0	0	0	0.4117	0	0	0	0	5.492	4.1475	2.1433	6.4071	2.5741	0	0	1.9629	0	0
Negative	1.8783	625.14	1.8783_625.1399	40.9067	31.1121	10.1877	20.4257	44.2774	18.7249	25.5481	10.4723	23.7942	3.9909	0	22.8231	11.4501	1.9029	22.1642	0	8.9828	5.2826	0	2.3618	49.7667	40.4867	13.0005	16.9042	24.1571	0	4.8958	9.0902	10.2615	2.3744	47.4705	50.9064	29.5613	23.9955	31.7508	9.1968	12.3898	2.8604	6.3503	8.2859
Negative	1.7756	625.14	1.7756_625.1404	0	0	0	0	0	2.4503	0	0	5.5097	0	0	0	0	0	0	0	8.132	2.8104	0	0	0	0	0	0	0	3.395	7.8473	9.7665	7.9754	4.462	0	0	0	0	0	3.6671	3.6109	0.8958	2.3637	0
Negative	2.0591	625.144	2.0591_625.1436	0	0	0	0	3.9821	0	2.6833	0	0	0	0	0	0	0	0	0	0	0	0	0	0	0	0	0	0	0	0	0	0	0	0	0	0	0	0	0	0	0	0	0
Negative	4.4631	629.15	4.4631_629.1499	0	0	0	0	0	1.5744	1.3816	1.6177	1.6364	1.9345	0	0	0	0	0	0.6263	0	1.0892	1.1189	0.7093	0	0	0	0	0	0	0	0.3819	0	0.6702	0	0	0	0	0	0.955	0	1.3606	0.693	0.5186
Negative	4.5769	629.153	4.5769_629.1528	5.8805	6.907	7.284	9.3373	7.0992	2.9477	4.0395	3.6774	4.5118	4.3971	4.9554	3.4677	4.766	5.6212	5.8276	1.9351	3.6615	3.8613	3.0348	2.2575	0	0	1.7452	3.5959	0	0	0	0	1.9264	1.8808	0	0	1.7042	0	2.8194	3.2623	2.6974	3.6585	2.6175	1.678
Negative	2.1284	629.215	2.1284_629.2152	0	0	0	0	0	0	2.4305	2.0187	0	0	0	0	0	0	0	0	0	0	0	0	0	0.9111	0	0	0	0.1768	0	0.1484	0	0	0	0	0	0	0	0	0	0	0	0
Negative	0.4293	630.875	0.4293_630.875	0	3.3809	3.3698	2.0011	2.3949	1.2874	2.2175	2.6069	3.0736	0.9802	1.5397	0	1.4497	1.9316	2.2623	2.4117	1.9322	1.0213	2.6365	2.6489	1.2104	1.7274	1.105	2.4603	1.6811	1.1552	0	2.0455	2.1295	0.8993	1.9644	2.3874	2.2219	0.6083	1.8766	1.7314	1.8941	1.5063	0	2.9514
Negative	0.4308	630.916	0.4308_630.9163	1.5127	0	0	0	0	0	0	0	0	0	0	0	0	0	0	0	0	0	0	0	0	0	0	0	0	0	2.8709	0	0	0	0	0	0	0	0	0	0	0	2.3514	0
Negative	1.2504	631.148	1.2504_631.1482	0	0	0	0	0	0.9152	0	0.3613	0	0.841	0	0.7454	1.837	1.1189	1.7876	8.2064	3.4055	4.1768	4.4505	4.1119	1.6533	0	0	0.6706	1.3284	0.299	1.5706	2.7515	1.5938	0.325	0	0	0	0.2774	0	0	0	0.3473	0	0
Negative	0.5154	631.155	0.5154_631.1554	3.9368	3.4705	2.6722	3.3712	4.5761	0	0.2021	0	0.4548	0	2.7329	1.1875	4.722	2.649	4.9793	0	0	0.5688	0.3012	0.5302	3.4015	2.4176	1.6856	3.0423	4.1996	0.2951	0	0	0	0.2166	2.9113	2.9738	6.6955	3.5516	8.8977	0.5478	0.4028	0	0.3478	0.4042
Negative	0.5224	631.171	0.5224_631.171	3.9368	3.4705	2.6722	3.3712	4.5761	0	0.2021	0.1733	0.4548	0	2.7329	2.7409	4.722	0	4.9793	0	0.2441	0.5688	0.3012	0.5302	3.4015	2.4176	1.6856	3.0423	4.1996	0.2951	0	0.4111	0	0.2166	2.9113	2.9738	6.6955	3.5516	8.8977	0	0	0	0.3478	0.4042
Negative	3.7241	631.22	3.7241_631.2199	0	0	0	0	0	0	0	0	0	0	0	0	0	0	0	0	0	0	0	0	0	0	0	0	0	1.1207	0	0	0	0	0	0	0	0	0	2.4731	1.9879	0	1.8284	1.5114
Negative	3.5948	631.223	3.5948_631.2234	0	0	0	0	0	0	0	0	0	0	0	0	0	0	0	0	0	0	0	0	0	0	0	0	0	0	0	0	0	0	0	0	0	0	0	5.7701	5.3605	0	4.0017	2.3641
Negative	0.4514	632.696	0.4514_632.6957	0	7.2291	10.3692	5.9493	0	0	0	0	0	0	5.0709	0	0	5.5504	0	0	0.1162	0	0.0819	0	2.5328	0	0	0	3.0133	0	0	0	0	0	0	0	0	1.7937	0.9246	0	0	0	0	0
Negative	0.4565	632.718	0.4565_632.7179	5.306	7.2291	10.3692	5.9493	5.0469	0	0	0	0	0	5.0709	0.8966	3.4953	5.5504	1.5068	0	0	0	0	0	2.5328	2.7844	4.1691	4.8255	3.0133	0	0	0	0	0	1.2914	0	1.0984	1.7937	0.9246	0	0	0	0	0
Negative	0.5261	633.168	0.5261_633.1677	11.6957	10.1462	5.6633	9.9598	11.4265	0.5267	1.0112	0	1.1725	0.5672	4.6849	0	7.0086	3.9066	10.1348	0	0.8843	1.0193	0.6749	0.6837	6.114	5.718	4.4402	6.0916	6.8552	0.3358	0	1.1394	0	0.1889	6.5717	7.3912	14.6234	7.4435	16.5838	1.4652	0.7902	0	0	0.7427
Negative	2.0977	149.062	2.0977_149.0619	0	0	0	0	0	0	0	0	0	0	2.7202	0	2.3194	1.6155	1.9553	0	0	0	0	0	3.2241	2.9203	3.4665	3.1136	3.5313	0	0	0	0	0	0	0	0	0	0	0	0	0	0	0
Negative	0.4746	150.949	0.4746_150.9489	0	0	0	0	0	2.258	2.1774	3.4206	2.0667	2.2794	0	0	0	0	0	5.6634	2.5303	2.3988	4.4011	3.7952	0	0	0	0	0	0.8665	1.8821	1.9771	1.5671	1.1231	0	0	0	0	0	0.6179	1.2409	1.7594	1.1315	3.7626
Negative	0.4982	151.067	0.4982_151.0675	0	0	0.6507	0.2629	0	0.5799	0.5082	0	1.0847	0.6984	0	0	0	0.2605	0	0.6884	0.5914	0.683	0.4303	1.1661	0	0	0	0	0	0	0.4163	0.305	0.3526	0.2464	0	0	0	0.3597	0.3459	4.5758	0.6881	0.788	2.8549	1.0355
Negative	4.5296	151.113	4.5296_151.1129	0	0	0	0	0	0.9849	1.3759	0.8339	1.4281	1.1521	0	0	0	0	0	0	1.2008	0.8384	0	0	0	0	0	0	0	1.1071	1.0617	1.4083	2.197	1.4892	0	0	0	0	0	2.5613	1.1056	2.1087	0.9082	0
Negative	1.765	152.035	1.765_152.0353	0	0	0	0	0	0	0	0	0	0	0	0	0	0	0.4388	7.9725	0	2.3906	0	0	0.6456	0	0	0.7644	0	0	0	0	0	0	0	0	0	0	0	0	0	0	0	0
Negative	2.5134	153.018	2.5134_153.0175	0	0	0	0	0	3.7615	0	9.5428	8.1095	2.198	5.8349	3.1581	0	0	7.1052	9.834	3.7456	15.8143	31.9065	43.9482	0	0	0	0	0	0	17.9395	3.5005	4.2908	1.302	0	0	0	0	0	3.7409	3.7707	1.3846	0	5.2786
Negative	2.7878	153.018	2.7878_153.0179	0	0	0	0	0	12.6907	8.4777	38.2044	17.3041	7.4108	0	3	0	0	5.5431	21.4579	12.8732	42.3326	51.9946	124.685	0	0	0	0	0	4.8078	27.3119	12.0964	15.3498	4.8895	0	0	0	0	0	12.6431	13.2237	4.1917	2.9468	15.8164
Negative	2.6345	153.018	2.6345_153.0178	0	0	0	0	0	4.5828	2.0613	10.6733	7.488	1.7485	5.8349	0	0	0	7.1052	5.3625	3.745	18.3886	14.5684	44.0404	0	0	0	0	0	1.016	17.1419	4.6212	5.1245	1.6229	0	0	0	0	0	5.1451	3.9459	0.9185	0	6.4663
Negative	1.5643	153.019	1.5643_153.019	0	0	0	0	0	4.0765	1.6899	0	0	0	0	0	0	0	0	4.0556	2.8583	2.928	0	0	0	0	0	0	0	1.5251	0	2.2578	0	0	0	0	0	0	0	0	0	0	0	0
Negative	1.6539	153.018	1.6539_153.0183	17.8197	12.1964	11.3505	15.0678	16.151	7.6438	5.75	3.1039	5.4335	4.2392	25.5993	19.7282	25.4102	25.7447	24.4545	13.761	10.7348	8.7641	5.9949	4.3085	16.7133	17.8812	10.8496	15.1059	15.1727	2.8732	3.1137	4.1678	2.6918	2.5512	8.157	7.8146	7.9672	8.3808	11.032	0	0	0	0	1.4447
Negative	2.8712	153.02	2.8712_153.02	1.4083	1.4314	1.0564	2.2873	0	12.6907	8.2237	0	16.5573	0	0	3	0	1.8965	5.5431	21.4579	2.8398	29.9261	0	0	2.4858	1.8594	2.4086	2.501	1.3708	4.8078	0	11.0477	10.0054	0	0.8954	1.0831	0	0.5815	0.7063	12.6431	13.2237	0	0	0
Negative	1.4848	153.055	1.4848_153.0554	1.2401	0	1.336	0	0	0.514	0	1.085	0	0.4658	0	0	0	0	0	0	0	0	0	0	0	1.1577	0	0	0	0	0	0	0	0	0	0	0	0	0	1.1803	0	2.0077	2.1215	0
Negative	0.4927	154.063	0.4927_154.0626	0	0	0	0	0	0.5936	4.3238	2.6543	0.8258	0.2993	0	7.5589	0	0	0	0.7878	0.4803	0.3127	0.5204	0.2242	0	0	0	0	0	6.694	0.4537	0	0.2192	2.3711	0	0	0	0	0	0.7213	1.0968	0.3218	0.6512	1.527
Negative	0.4866	154.901	0.4866_154.9011	0	0	0	0	0	2.9832	2.8492	3.3577	1.1625	2.9212	0	0	0	0	0	2.2646	2.0975	2.6355	2.77	2.2822	0	0	0	0	0	0.7781	1.5925	1.7065	1.2993	0.9161	0	0	0	0	0	0	1.0203	1.3473	0.9746	1.2854
Negative	0.5399	155	0.5399_154.9997	2.2254	2.3954	2.1074	1.5386	2.7577	3.4585	0	0	4.0385	2.1628	9.6634	3.2909	7.7098	9.2283	5.4473	2.1739	3.953	2.3201	2.5247	2.7709	8.6777	7.5072	11.7498	11.5051	7.132	2.2755	14.9954	11.3099	11.1157	3.5255	6.1016	5.8953	5.6842	6.9368	5.771	5.1248	4.748	0	4.2081	0
Negative	0.726	155	0.726_155.0005	0	0	0	0	0	0	1.2752	1.3649	0	0	0	0	0	0.8651	0	0	0	1.3494	0	1.9547	0	0	0.76	0	0	2.5811	1.6858	5.3559	5.7388	4.4922	0	0	0	0	0	0	1.3445	0	0	0
Negative	0.6912	633.175	0.6912_633.1752	0	3.6324	0	0	0	1.115	1.144	1.6442	2.2312	1.1591	0	0	0	0	0	1.5545	1.2868	1.1711	1.0344	1.5908	0	3.195	0	0	0	0.6096	1.0807	0.9064	1.5176	0.9038	0	0	0	0	0	1.5473	1.4747	1.7562	0.8041	1.7583
Negative	0.5239	633.188	0.5239_633.1876	11.6957	10.1462	2.5754	9.9598	11.4265	0.5267	1.0112	0.8536	1.1725	0.5672	1.3337	6.0178	7.0086	3.9066	10.1348	0.4671	0.8843	1.0193	0.6749	0.6837	0	5.718	4.4402	6.0916	6.8552	0.3358	0	1.1394	0.9192	0.3908	6.5717	7.3912	14.6234	3.8687	16.5838	1.4652	0.7902	0.7798	0.4493	0.7427
Negative	0.6792	633.19	0.6792_633.1901	2.9012	3.6324	2.6708	2.4514	3.287	0	0	0	2.2312	0	0.7822	1.9986	2.0707	0	3.7232	0	0	0	0	1.5908	0	3.195	0	0	2.7001	0	0	0	0	0	1.7638	0	3.9204	0.6483	0	0	0	0	0	1.7583
Negative	4.0365	633.204	4.0365_633.2038	0	0	0	0	0	0	0	0	0.438	0.2975	0	0	0	0	0	2.4621	1.3903	0.8728	2.0995	0.7345	0	0	0	0	0	0	0	0	0	0	0	0	0	0	0	0	0	0	0	0
Negative	3.8308	633.239	3.8308_633.2391	0	0	0	0	0	0	0	0	0	0	0	0	0	0	0	0	0	0	0	0	0	0	0	0	0	0	0	0	0	0	0	0	0	0	0	0	1.9209	0	1.8206	1.4302
Negative	2.7582	633.277	2.7582_633.2767	0	0	0	0	0	0.4934	0	0	0	0.2452	0	4.8945	0	0	2.6379	3.1223	1.312	0	1.0655	0.9119	0.3367	0	0	3.475	0	6.0091	5.9489	4.5193	5.7553	6.6789	0	0	3.4823	0	0	2.4566	2.8846	1.572	2.4651	2.1413
Negative	5.932	633.277	5.932_633.2774	0	0	0	0	0	0	0	0	0	0.191	0	0	0	0	0	0	0	0	0	0	0	0	0	0	0	0	0	0	0	0	0	0	0	0	0	19.9049	0.2897	0	10.5023	0
Negative	0.508	634.189	0.508_634.1892	2.7776	2.8183	2.1858	2.8387	2.9392	0	0	0	0.2594	0	0	1.8738	1.7983	1.028	2.6421	0	0	0.2026	0	0	1.9773	1.684	0.8647	1.7873	2.3849	0	0.0635	0	0.3016	0	1.8219	2.0169	3.7485	0	4.167	0.3018	0	0	0.1861	0
Negative	2.3207	635.22	2.3207_635.22	7.8553	11.1512	9.1771	8.4433	0	0	0	0	0	0	4.9636	2.7834	0	6.6604	3.2039	0	0	0	0	0	0	3.5284	0	0	0	0	0	0	0	0	0	2.2508	1.6906	0	0	0	0	0	0	0
Negative	2.1886	635.22	2.1886_635.2201	20.1036	18.8957	20.3503	18.4659	12.0955	7.887	4.6448	5.91	9.2311	7.1469	14.1439	5.4071	14.1651	12.0193	6.9882	0	3.9375	2.6003	4.506	3.3884	3.9356	5.6237	1.9033	4.2272	6.4119	0	6.1032	0	5.3999	2.8392	3.3168	3.2313	3.0039	4.497	3.0085	0	0	1.9771	0	2.2236
Negative	2.2572	635.247	2.2572_635.2475	0	0	0	0	0	0	0	2.8703	3.2541	3.7662	0	0	0	0	0	0	0	0	0	1.5577	0	0	0	0	0	0	2.8932	0	1.7942	0	0	0	0	0	0	0	0	0	0	1.6004
Negative	2.4674	635.254	2.4674_635.2543	3.8539	3.536	0	0	5.3003	3.5189	0	0	3.7503	3.0885	12.0799	24.8385	15.0196	13.5165	28.8439	25.667	8.8944	9.9498	13.707	17.9703	17.5697	16.8697	17.1707	22.101	17.6545	14.7481	33.0994	35.8333	38.2637	29.3272	12.0396	17.8808	21.0811	6.5932	14.1926	12.1907	14.4785	6.7475	11.6192	17.3241
Negative	3.4435	635.259	3.4435_635.2585	4.4451	3.3898	1.5651	4.8819	4.6626	0	0	0	0	0	2.9956	7.4918	3.0606	2.2006	6.5115	0	0	0	0	0	0.6663	0.7751	0	0	0	0	0	0	0	0	0	0	0	0	0	0	0	0	0	0
Negative	1.4086	637.173	1.4086_637.173	2.6104	4.7143	3.2722	5.0038	3.8167	0	0	0	0	0	5.9017	2.2403	10.1775	0	0	0	0	0	0	0	12.0532	11.866	8.3164	0	13.5379	0	0	0	0	0	0.5679	0.6173	0.4487	0.3417	1.4126	0	0	0	0	0
Negative	3.6105	637.175	3.6105_637.1749	63.3338	50.9183	82.832	86.2017	60.5849	27.146	31.4907	28.897	34.7418	16.5732	66.4841	64.1639	87.4726	78.6777	56.0337	16.8459	27.2669	26.4177	28.0261	21.017	47.3684	32.2624	53.0093	41.9568	41.6282	11.2902	18.1886	15.4365	17.9007	13.4816	77.1148	53.0415	58.7648	78.5236	81.9137	26.9956	24.5605	34.7921	35.3344	26.3798
Negative	3.4503	637.177	3.4503_637.1772	0	0	0	0	0	12.7268	14.1376	13.3617	13.248	7.5431	0	0	0	0	0	7.9563	15.5569	16.8447	13.9096	10.5391	0	0	0	0	0	4.2012	6.8553	5.0411	5.3862	4.5492	0	0	0	0	0	10.0323	10.8618	16.1399	16.8397	13.7331
Negative	0.6192	155.001	0.6192_155.001	0	0.9064	0.7477	0.5548	0.4598	3.4625	0	0	4.0385	3.896	1.873	0.5461	2.5799	3.7839	1.2591	2.1739	3.953	2.3201	2.5247	2.8746	0	3.479	5.2288	0	2.1891	3.5219	14.9954	11.3099	6.7656	5.5369	0	0	0	1.6688	1.9776	0	2.5607	0	2.0299	1.8435
Negative	0.6709	155.949	0.6709_155.9493	1.1422	2.0558	2.6122	1.7838	1.047	0	0	0	0	0	3.2431	2.1367	4.1003	4.0349	2.3148	0	0	0	0	0	3.1567	2.0487	3.7955	2.8392	2.8595	0	0	0	0	0	2.7972	2.5213	3.1574	4.7657	4.5561	0	0	0	0	0
Negative	0.493	156.896	0.493_156.8959	0	0	0	0	0	2.1023	2.1069	2.1099	0.9151	2.0444	0	0	0	0	0	1.5256	1.4473	1.4629	1.5187	1.4182	0	0	0	0	0	0.25	0.9703	0.7523	0.5886	0.7394	0	0	0	0	0	0	0.6733	0.8235	0.8691	0.7032
Negative	0.5129	158.045	0.5129_158.0446	0	0	0	0	0	0	1.9226	1.8852	0.2786	0	0	0	0	0	0	0	0.7158	0.3367	0.4309	0.3366	0	0	0	0	0	0.2206	0	0	0	0.3124	0	0	0	0	0	0	0	0	0	0.3278
Negative	1.6627	158.081	1.6627_158.0808	0	0	0	0	0	0.7201	2.1902	2.4292	0.4887	0.4339	0	0	0	0	0	2.0207	0.6497	1.139	0.4786	0	0	0	0	0	0	1.2674	0.8191	0.5357	0.4095	0.8012	0	0	0	0	0	0	0	0.4863	0.5619	0.6219
Negative	0.4337	158.978	0.4337_158.9776	31.917	42.1475	46.8461	38.0654	34.9582	25.8107	41.0718	42.9991	37.1404	24.5645	31.7093	33.3398	25.7896	36.1854	34.8738	30.8226	33.8187	25.7948	34.9671	30.8067	23.955	27.8495	24.9683	38.7017	28.8556	27.6153	36.1097	33.4121	28.235	21.611	29.8838	31.9143	35.1427	26.9951	33.4157	30.5702	29.6059	29.1227	30.0776	46.4937
Negative	0.6354	159.012	0.6354_159.0122	0	0	0	0	0.6218	0.9798	0	0	1.1598	0	0	0	0	0.771	0	7.7657	2.6265	1.7893	2.5045	1.8037	0	0	0	3.5628	1.3608	3.1534	1.1498	1.2275	0.6476	2.4149	1.1337	0	0	0.5179	1.2742	0	0	0	0	0
Negative	0.5218	159.013	0.5218_159.013	3.7779	1.5968	0.8364	4.1834	3.5957	0	0	0	1.1585	0	3.9501	3.6688	5.2232	2.9123	7.2403	8.9657	0	0	1.0782	1.3474	6.2877	5.6638	10.2158	16.4251	5.2028	1.7994	0	0.8451	0.8971	0.9306	3.3483	2.282	2.6545	0.9604	2.2418	0	0	0	0	1.226
Negative	0.533	160.842	0.533_160.842	13.0198	16.96	19.3015	12.6077	14.6451	3.1811	4.835	3.9205	4.5836	2.7316	16.7405	11.0728	20.1181	21.0521	15.6823	0	0	2.0346	0	0	18.0606	12.9604	19.6952	21.2708	17.4064	0	4.8394	3.9336	4.3138	0	15.2379	13.8304	15.7849	27.1787	20.9374	0	4.2378	0	2.3492	0
Negative	0.6069	160.846	0.6069_160.8458	0	0	0	0	0	3.1811	4.835	3.9205	4.5836	2.7316	0	0	0	0	0	0	2.1226	2.0346	3.4047	3.2862	0	0	0	0	0	0.7677	4.8394	3.9336	4.3138	2.0236	0	0	0	0	0	0	4.2378	2.6793	2.3492	1.8721
Negative	4.3311	161.044	4.3311_161.0441	0	0	0	0	0	0	0	0	0	0.9668	3.7056	0	0	0	0	0	0	0	1.1291	1.377	0	0	0	0	0	0	0	0	0	0	3.7559	3.7765	3.3629	0	4.6981	3.6965	4.0521	3.9993	1.7679	2.9107
Negative	4.1033	161.045	4.1033_161.045	3.1726	0	0	0	0	2.7904	1.6845	2.3172	2.5842	2.3171	4.9721	3.6112	3.9089	5.3386	4.5105	4.5433	3.6532	3.9277	2.9595	3.8177	4.376	3.5319	0	4.0536	4.1205	4.1957	4.4456	4.1068	5.3983	3.3612	4.3498	4.5887	3.3367	0	6.0199	4.3171	5.9451	4.1299	4.2559	5.1923
Negative	3.0214	161.045	3.0214_161.0451	0	0	0	0	0	0	2.0957	1.8844	0	0.9045	3.2667	4.8687	0	4.5073	4.7585	4.1969	4.9339	4.5173	3.3014	1.988	0	0	0	0	0	0	0	0.9954	0	0	0	0	0	0	0	2.6235	2.2424	2.3555	2.3324	0
Negative	3.9784	161.046	3.9784_161.0455	0	0	0	0	0	2.2107	1.2516	1.5172	2.0534	1.6757	0	0.8318	0	0	0	2.6888	1.6476	0	1.869	2.7413	1.1781	0.9793	0	1.4767	1.271	2.7816	3.3701	3.6937	4.3722	2.2773	0	0	0	0	0	2.6375	3.6192	3.3106	3.2722	3.7547
Negative	2.8216	161.046	2.8216_161.0458	0	0	0	0	0	0	1.0598	0	0	0.725	0	0	0	0	0.81	1.3155	0	2.4037	0	1.3558	0	0.1988	0	0	0	0	0	0	0	0	0	0	0	0	0	1.1113	0	0	0	0
Negative	0.5087	161.046	0.5087_161.0464	1.2736	1.6259	2.1909	1.2173	1.7071	1.6835	1.03	1.0523	1.7448	1.1688	0	0	2.0197	2.0443	1.4219	0	1.4635	0	1.1387	0	0	1.313	1.4965	1.8467	1.8566	0	1.4751	1.3538	1.1346	0	0	1.7518	2.3541	0	1.9543	2.1963	2.0427	2.022	1.5546	2.1098
Negative	3.3759	637.178	3.3759_637.1779	0	0	0	0	0	0	7.6319	11.3399	10.2165	5.1941	0	0	0	0	0	4.5983	8.7335	0	9.6982	5.7855	0	0	0	0	0	3.1335	0	0	3.4417	2.7376	0	0	0	0	0	5.5605	5.1896	7.3292	12.6504	0
Negative	1.3948	637.199	1.3948_637.199	4.5312	4.7143	3.2722	5.0038	4.5926	3.2886	0	0	3.0424	2.128	0	2.2403	10.1775	3.3385	2.9822	0	0	0	0	0	12.0532	11.866	8.3164	9.9926	13.5379	1.8713	4.8816	3.8689	4.1987	2.9237	0	0.6173	0.4487	0.6539	1.4126	0	0	0	0	0
Negative	7.2758	637.321	7.2758_637.321	0	0	0	0	0	0.9417	1.2904	1.3396	1.9469	0.8945	0	0	0	0	0	0	2.2524	1.5507	1.9379	1.5445	0	0	0	0	0	0	0	0	0	0	0	0	0	0	0	0.7448	1.5124	0.6386	1.6044	3.8405
Negative	6.1509	641.252	6.1509_641.2521	0	0	0	0	0	0	0	0	0	0	0	0	0	0	0	0	0	0	0.2992	0	0	0	0	0	0	0	0.2384	0.2861	0.3374	0.7204	0	0	0.4282	0	0	2.1506	1.4736	0.7036	1.844	1.6596
Negative	8.7409	641.353	8.7409_641.3529	11.8403	7.9557	0	5.8329	11.8292	2.3366	1.9456	2.2827	2.9232	1.6357	5.5966	7.4601	8.5598	7.3241	0	0	12.1254	10.2029	1.9854	1.3789	1.8067	3.7974	0	0	6.536	0	0	0	0	0	5.5418	0	0	7.5329	11.2028	3.7763	6.4572	2.0269	14.1556	4.34
Negative	7.76	641.353	7.76_641.353	0	0	0	0	0	0	0	0	1.8006	1.6215	0	0	0	0	0	0	3.4558	0	0	0	0	0	0	0	0	0	0	0	0	0	0	0	0	0	0	0	0	0	2.7154	0
Negative	3.7719	643.188	3.7719_643.1885	1.889	0	0	0.9617	2.9199	0	0	0	0	0	1.0667	1.66	5.0557	0	1.6066	0	0	0	0	0	1.2445	0.5893	1.1013	1.542	0.5639	0	0	0	0	0	2.3049	0	1.205	0	0	0	0	0	0	0
Negative	5.7396	643.277	5.7396_643.2771	0	0	0	0	0	0	0	0.9344	0	0	0	0	0	0	0	0	0.6212	0.7661	0	0	0	0	0	0	0	7.3601	0	0	0	1.3279	0	0	0	0	0	0	4.4878	0	0	0.3899
Negative	0.7079	645.189	0.7079_645.189	2.1999	1.6374	1.138	0	2.423	0	0	0.6067	0.8358	0.4334	0	2.3723	3.0633	0.9505	3.3648	0	0	0.4136	0.5303	0	2.3857	3.9112	1.6395	2.0072	2.1967	0	0	0.3099	0	0.3587	1.6798	1.6486	2.0622	1.3847	2.7614	0.7268	0.6563	0.8611	0.4422	0.5615
Negative	3.0589	645.195	3.0589_645.1948	0	0	0	0	0	0	0	0	0	0	0	0	0.3213	0	0	0	0	0	0	0	0	0	0	0	0.153	2.8219	0	0	0	3.9516	0	0	0	0	0	0	0.4952	0	0	0
Negative	0.4258	646.855	0.4258_646.8554	2.1727	2.2625	0	0.7359	1.8049	2.3806	1.9296	1.909	3.7468	2.1332	0	1.843	2.1223	2.698	2.6343	2.3391	1.9702	1.7235	2.1566	2.5555	0	2.2317	3.0523	2.6462	2.3891	1.8745	0	1.8254	2.1534	1.2848	1.7651	2.761	2.8331	2.4805	2.6802	2.1382	2.2313	1.7199	0	1.569
Negative	0.431	646.894	0.431_646.8936	0	0	0	0	0	0	0	0	0	0	0	0	0	0	0	0	0	0	0	0	0	0.3056	0.2651	0	0.1541	0	1.6738	0	0	0	0	0	0	0	0	0	0	0	2.0652	0
Negative	0.5252	647.183	0.5252_647.1833	8.2089	6.3543	4.9004	8.0182	7.9581	1.5514	2.0306	0	1.7062	0	3.0936	5.1171	3.7994	2.95	8.3356	0	1.2901	1.3479	0	1.1638	4.1488	5.7835	2.3115	3.8858	4.0209	0.5989	0	1.0609	0	0	3.8944	4.062	8.1485	5.5077	8.0943	3.1902	0	0	0	0
Negative	0.6883	647.184	0.6883_647.1844	11.4716	12.6172	14.1996	9.8717	10.3252	0	0	0	0	0	5.747	10.5691	9.2609	6.103	15.904	0	0	0	0	0	8.3369	20.1927	6.1942	8.4633	7.6684	0	0	0	0	0	8.5288	8.3709	11.1235	8.5459	10.5195	0	0	0	0	0
Negative	0.7002	647.204	0.7002_647.2037	13.74	12.6172	0	9.8717	10.3252	2.506	3.4091	3.9313	3.9289	2.8003	0.9567	11.4615	9.2609	6.103	15.904	3.4039	2.1917	2.522	2.2955	2.9155	1.2859	20.1927	6.1942	8.4633	7.6684	1.6628	0	1.8765	3.4105	1.7849	8.5288	8.3709	11.1235	8.5459	10.5195	2.8044	4.2092	3.0089	0	3.9213
Negative	0.5256	647.204	0.5256_647.2038	8.2089	6.3543	0	8.0182	7.9581	1.5514	2.0306	2.1021	0	0	2.5108	5.1171	3.7994	2.95	8.3356	0	1.2901	0	0	0	0	0	2.3115	3.8858	4.0209	0	0	1.0609	0	0	3.8944	4.062	8.1485	5.5077	8.0943	3.1902	0	0	0	0
Negative	0.5378	162.841	0.5378_162.8408	13.477	15.5801	17.5924	11.7829	12.6213	0	0	0	3.6603	0	14.5557	10.4857	19.0976	18.073	14.0528	0	2.0996	0	0	0	15.7865	12.5321	20.2096	19.657	15.7946	0	4.6045	3.4482	0	0	14.1223	13.2609	14.5354	24.3589	17.4557	0	0	2.6945	2.3402	0
Negative	0.6254	162.842	0.6254_162.8416	0	0	0	0	0	3.5102	3.268	3.8846	3.5675	2.7987	0	0	0	0	0	1.1481	0	1.8173	3.1855	2.7928	0	0	0	0	0	1.0996	0	2.5611	3.4657	1.9412	0	0	0	0	0	3.297	3.6824	2.6945	2.491	1.6458
Negative	2.0331	163.039	2.0331_163.0391	13.2452	11.2649	9.8595	16.369	13.3484	2.3136	4.9051	3.1495	2.2685	2.5893	13.9255	10.7876	12.1492	11.0166	7.4112	3.8506	0	2.1464	1.9295	1.9687	17.8958	9.9642	17.3301	15.2847	16.0719	1.567	2.8114	2.4814	2.0648	0	17.9309	18.2667	10.1387	19.3406	16.3308	0	2.3413	3.6366	3.3818	2.7206
Negative	4.7224	163.075	4.7224_163.0746	33.3519	29.1619	32.5567	46.2075	29.1366	14.9629	16.2312	10.4558	10.6475	15.6821	31.9409	19.9452	22.7042	33.9547	21.469	8.775	16.5768	19.5002	8.9083	10.5656	17.5851	33.3649	8.7441	15.1205	30.2368	7.6992	12.3544	11.9405	5.6771	13.624	63.3622	72.7241	52.7434	77.1801	71.1373	40.6885	39.2492	59.7865	53.2449	24.128
Negative	1.9887	164.034	1.9887_164.0344	1.1399	2.7309	0	4.3157	2.6892	0.3428	1.1903	0	0	0.5513	0	0	0	0	0	0	0.4311	0	0.3148	0.2044	0	0	0	0	0	0	0	0	0	0	0	0	0	0	0	0	0	0	0.588	0.2474
Negative	2.1143	164.07	2.1143_164.0697	0	0	0	0	0	1.1277	3.2692	4.0534	0	0	0	3.5592	0	0	0	0	0	2.4058	0	1.543	0	0	0	0	0	0	0	0	0	0	0	0	0	0	0	0	0	0	0	0
Negative	2.894	164.071	2.894_164.0711	0	0	0	0	0	0	0.6609	0	0	0	0	0	0	0	0	0	0	0	0	0	0	0	0	0	0	4.3233	0	0	0	3.3089	0	0	0	0	0	0	0.4783	0	0	0
Negative	1.1573	164.071	1.1573_164.0712	0.4847	0.4091	0	0.7077	0.3501	0.3194	0.8051	0	0	0	0	3.1695	0	0	0.9164	0.3456	0.4904	0.3425	0	0	0	0.3358	0.4787	0.3742	0.3564	0	0	0	0.1762	1.5701	0.404	0	0	0.5131	0.6752	0	0.4662	0	0	0.1658
Negative	0.5339	164.836	0.5339_164.8364	3.826	5.1655	5.7644	4.1349	4.3393	0	0	0	0	0	5.2217	3.5531	5.4735	6.2594	4.9333	0	0	0	0	0	5.5879	4.0625	6.2654	6.8308	5.2824	0	0	0	0	0	4.5482	4.1368	4.7522	8.305	5.5833	0	0	0	0	0
Negative	0.4757	164.935	0.4757_164.9349	0	0	0	0	0	7.1433	3.2836	4.1933	6.4501	7.2608	0	0	0	0	0	6.0545	6.5031	5.0151	6.5719	6.2946	0	0	0	0	0	2.7953	4.1564	3.8511	4.1107	2.7516	0	0	0	0	0	1.8522	4.3956	4.7168	2.9813	3.5968
Negative	0.5081	165.04	0.5081_165.0397	29.8361	33.8329	48.1392	31.1538	27.6579	11.5076	17.5317	21.0573	19.6406	11.2724	27.6754	36.4044	27.3818	37.9893	33.2956	9.1612	15.619	16.1532	13.1801	18.6174	19.4309	31.9076	25.5289	29.2921	28.2211	11.887	14.4112	13.7957	17.4041	12.5848	23.751	26.1463	46.927	26.0957	27.7395	34.2234	24.552	13.9237	17.4835	22.3054
Negative	0.6041	165.042	0.6041_165.0416	0	0	0	0	0	0	17.5317	21.0533	0	10.5704	0	0	0	0	0	0	0	0	0	0	0	0	0	0	0	9.0573	0	0	0	10.7884	0	0	0	0	0	0	0	0	0	19.3585
Negative	2.0073	165.055	2.0073_165.0548	2.0564	1.516	0	0	1.5556	0.6226	0	0	0	0	1.5656	0	0	1.7885	0	0	0	0	0	0	2.8225	2.2634	3.895	2.699	2.9962	0	0	0	0	0	9.6422	9.0567	6.5401	16.8549	9.4759	0	0.2982	2.9351	2.8637	0
Negative	5.8583	165.128	5.8583_165.1278	0	0	0	0	0	0.6321	0.5928	1.1373	0.9157	0.798	0	0	0	0	0	0	0.9592	1.1257	1.5829	1.2059	0	0	0	0	0	0.2927	0	0.2036	0.2204	0.9625	0	0	0	0	0	0	1.0848	3.3527	0.6784	4.6069
Negative	1.2345	167.034	1.2345_167.0343	1.176	1.3972	2.199	1.7725	1.0231	0	1.3696	0	0	0	1.1199	0.932	1.3329	1.0648	0.8738	0	0	0	0	0	1.3049	0.9045	1.4468	1.299	0.9072	0	0	0	0	0	8.9982	6.0105	3.8085	11.5691	4.8095	0	0	3.8576	1.9772	0
Negative	2.9301	168.042	2.9301_168.0421	2.9391	3.8606	5.8476	3.1083	3.2872	0	0	0	0	0	4.0506	2.8434	2.9473	5.3897	2.3927	0	0	0	0	0	2.9513	2.9052	6.3397	4.7212	2.1061	0	0	0	0	0	1.0253	0.7553	0.8836	1.1169	0.8005	0	0	0	0	0
Negative	6.2359	647.24	6.2359_647.2398	0	0	0	0	0	0.4779	0.3361	0.4652	0.6541	0.4507	0	0	0	0	0	1.6888	0.8535	0.7534	0.5312	0.6429	0	0	0	0	0	1.3307	2.7694	2.2621	2.7112	2.1276	0	0	0	0	0	0	0	0.5285	0	0
Negative	4.1462	647.266	4.1462_647.266	0	2.7513	0	0	2.8882	0	0	0	1.6152	0.7781	3.4097	0.7741	0	2.1815	0.9712	0	0.9849	0	0	0	0	0	0	0	0	0	0	0	0	0	0	0	0	0	0	0	0	2.2334	0	2.7913
Negative	3.6389	649.268	3.6389_649.2681	0	2.6138	0	0	0	2.2457	2.3675	0	0	0	0	0	0	0	0	0	2.2462	2.146	0	0	0	0	0	0	0	0	0	0	0	0	0	0	0	0	0	0	0	0	0	0
Negative	0.482	650.184	0.482_650.1843	0	0	0.5452	0.5616	0.5347	0	0	0	0	0	2.1813	0	0	5.4988	0	0	0	0	0	0	9.5967	0	0.4831	0	2.5924	0	0	0	0	0	0.4301	0	0	5.9012	6.5101	0	0	0	0	0
Negative	0.4868	650.215	0.4868_650.2151	0.642	0	0	0.5616	0.5347	0	0	0	0	0	2.1813	0.5708	3.2705	5.4988	0	0	0	0	0	0	0	3.8106	8.5502	2.3063	2.5924	0	0	0	0	0	6.8767	4.3115	6.3246	5.9012	6.5101	0.8706	0.2848	0	0	0
Negative	1.8163	651.188	1.8163_651.1879	0	27.171	25.7343	11.0282	29.0705	0	0	0	0	0	23.4071	4.9555	0	0.6976	4.8281	0	0	0	0	0	20.6623	22.5561	11.095	0	0	0	0	0	0	0	2.6505	10.2483	0	11.1377	11.1815	0	0	0	0	0
Negative	4.6071	651.192	4.6071_651.1921	15.3743	10.8669	22.3219	25.1882	10.2654	8.8401	9.6785	8.7054	7.7895	9.5594	9.2909	0	9.9015	17.8634	2.7729	3.8829	3.8383	3.2718	2.5703	3.9199	0	0	0.5204	0	0	0	0.2887	0	0	0.3515	0	0	0	0	0	0	0	0	0	0
Negative	1.6511	651.211	1.6511_651.2105	0	0	0	0	0	1.7031	0	0	0	0	0	0	0	0	0	0	0	0	0	0	0	0	0	0	0	0	1.7196	0	0	0.9006	0	0	0	0	0	0	0	0	0	0
Negative	1.81	651.213	1.81_651.2129	34.4909	27.171	0	31.1557	29.0705	18.2263	10.088	13.0949	22.0812	10.6458	6.94	11.822	41.0554	20.4308	15.0045	2.0793	14.3196	9.693	9.3952	7.9673	22.7731	22.5561	11.095	17.3719	24.801	4.884	16.6728	11.8198	10.4081	8.4142	11.9959	12.7459	11.1826	11.6024	12.2216	8.0114	3.8887	6.8569	6.7027	5.9755
Negative	1.9198	651.215	1.9198_651.2147	0	12.3382	0	0	0	9.2118	4.949	5.5008	10.187	7.1059	0	3.3519	0	7.9644	0	0	5.5744	3.7355	4.4894	3.2766	0	0	0	0	0	1.8286	4.0065	2.0379	3.1874	1.8678	0	0	0	0	0	2.8075	2.478	2.3897	2.7454	0
Negative	3.4282	651.264	3.4282_651.2644	0	0	0	0	0	0.7011	0	0	0.7209	0.713	0	0	0	0	0	0	0.3294	0	0	0	0	0	0	0	0	0	0	0	0	0	0	0	0	0	0	1.308	3.0199	2.3255	3.8946	2.7767
Negative	2.8604	653.138	2.8604_653.1381	0	0	0	0	0	0	0	0	0	0	0	0	0	0	0	0	0.2476	0	0	0.1803	0	2.4049	0	0	0	1.3624	5.186	3.8822	3.6033	1.5721	0	0	0	0.3354	0	0	0	0	0	0
Negative	3.6612	653.169	3.6612_653.1694	0	0	0	0	0	0	0	0	0	0	0	0	0	0	0	0	0	0	0	0	0	0	0	0	0	0	9.9111	5.2571	6.9479	0	0	0	0	0	0	0	0	0	0	0
Negative	3.2963	653.171	3.2963_653.1709	50.8456	41.9135	55.2102	48.6728	47.5015	20.8111	21.3611	21.7584	25.2927	14.15	45.1674	45.0857	47.749	59.701	36.4143	6.8748	25.03	22.0338	20.1334	12.954	42.6648	43.0675	52.5885	38.9412	46.7493	6.1998	18.6799	13.7706	21.9182	14.011	47.4903	41.9547	52.7725	43.3641	51.2176	22.1208	23.3012	27.0595	27.7969	14.1744
Negative	3.0568	653.175	3.0568_653.1748	0	0	0	0	0	4.6276	3.5426	4.7058	4.4855	3.7371	0	0	0	0	0	0	4.4744	4.1996	3.1921	3.3806	0	0	0	0	0	0	3.9911	2.2087	3.8128	2.3897	0	0	0	0	0	2.6352	2.9074	4.2755	4.0499	1.9542
Negative	3.1642	653.176	3.1642_653.1763	0	0	0	0	0	4.6764	3.8858	5.8586	0	3.7371	0	0	0	0	0	0	4.4744	6.2923	3.9581	3.8204	0	0	0	0	0	6.1998	5.3833	4.0934	6.0425	0	0	0	0	0	0	2.8908	3.2811	5.2514	5.3866	2.0665
Negative	1.8112	169.049	1.8112_169.0495	3.4486	3.108	7.0832	5.433	3.0899	2.4863	2.222	2.5234	1.9777	0	3.6692	2.9869	4.2739	4.6897	1.9269	0.8939	0	0	0	0	2.9356	2.1572	2.4562	4.1057	2.7123	0	0	0	0	0	3.9242	2.5867	0	4.0453	0	0	0	0	2.8702	1.444
Negative	3.2504	171.065	3.2504_171.065	0	0	0	0	0	0.9229	1.0592	0.9308	1.1026	0.9875	0	0	0	0	0	1.1183	1.9556	1.5079	1.8295	1.2126	0	0	0	0	0	0.4939	0.6737	0.6506	1.2696	1.2302	0	0	0	0	0	1.5973	1.1875	1.5155	2.2165	1.0585
Negative	6.1276	171.102	6.1276_171.1021	0	0	0	0	0	0.6621	0	0	0	1.5728	0	0	0	0	0	0	0	0	2.0793	1.19	0	0	0	0	0	0	0	0.3915	0	0.2912	0	0	0	0	0	0	0.7447	1.4021	0	0
Negative	0.4642	172.025	0.4642_172.0247	0.9799	0.8923	1.0173	0.6694	1.2725	0	0	0	0	0	1.083	1.015	1.0927	0.4773	2.1267	0	0	0	0	0	1.638	3.0087	1.0393	1.7413	4.5372	0.3112	0	0	0	0	0.8639	2.8899	3.6373	1.6998	2.9742	0	0	0	0	0
Negative	2.3855	172.096	2.3855_172.0964	0	0	0	0	0	0	1.3488	0	0	0	0	0	0	0	0	5.8352	1.7827	1.9748	1.9747	0.6625	0	0	0	0	0	1.545	0.7917	0.5	0.4913	1.1088	0	0	0	0	0	0	0	0	0	0.508
Negative	2.4677	172.096	2.4677_172.0965	0	0	0	0	0	1.06	3.0766	3.3791	0.6499	0	0	0	0	0	3.8204	15.6959	4.6602	4.675	5.0578	1.7309	0	2.7539	0	0	0	5.0204	2.2447	1.9049	1.5324	3.9247	0	0	0	0	0	0.6085	0.7425	0	0.9685	2.0562
Negative	2.2501	172.097	2.2501_172.0966	0	0	0	0	0	0	0	1.549	0	0.2971	0	0	0	0	0	5.6204	0	1.8905	2.084	0.7759	0	0	0	0	0	1.4778	0.2284	0	0	0.8326	0	0	0	0	0	0	0	0	0	0.5318
Negative	0.8111	173.008	0.8111_173.0085	0	2.7949	0	2.9442	0	8.5215	3.1753	3.9724	1.9686	11.0452	0	0	0	3.5826	3.0896	3.9715	7.3151	6.0665	6.3614	8.6217	0	0	0	3.2848	3.8518	4.5168	6.4531	1.8736	2.0077	5.6382	0	3.8409	0	0	0	9.8696	13.2964	0	5.4929	10.6397
Negative	0.7365	173.009	0.7365_173.0087	3.3822	7.86	9.7527	4.8397	4.1942	9.9671	3.9141	5.7318	12.9741	15.2473	5.9482	6.4841	7.1944	6.7856	5.788	5.253	6.1193	6.1424	11.1423	13.5057	6.7863	7.5953	7.8987	4.8147	6.5454	6.5581	7.943	15.1688	17.5661	11.9124	7.5737	5.0021	6.4001	9.3027	0	11.0584	14.9496	10.774	6.4696	21.5795
Negative	0.5286	173.009	0.5286_173.0092	7.8471	8.2644	9.5306	6.3574	6.9263	17.0795	10.7252	8.745	31.2054	24.3322	18.9132	7.8098	17.0119	22.1177	12.5541	6.6481	15.9112	9.4206	13.4666	10.1563	17.6829	16.7835	26.2713	22.4193	16.0955	7.6279	39.4902	29.0284	30.1428	10.7792	12.296	14.0489	14.8043	17.7753	12.785	27.2189	23.1445	21.1898	7.3622	20.5995
Negative	0.9552	173.01	0.9552_173.0096	0.5587	0	0.8722	0.8873	0.3528	0	0	0.6295	1.0775	1.3897	0	0	0	0	0	0	0	0.9483	0	2.1281	0	0	0	1.0126	0	1.4681	3.8099	1.7357	1.7639	2.7706	0.7625	0	0	0.7761	0	0	0	1.2767	0	2.1131
Negative	0.623	173.01	0.623_173.0096	3.0688	5.8527	7.7632	4.8397	3.8987	14.6193	4.8229	4.132	20.9114	17.241	5.2122	3.9578	8.6484	6.7856	5.9662	6.6844	13.214	8.3449	11.2852	11.6591	6.7545	6.2745	12.702	10.3851	7.1569	10.2039	39.4902	29.0284	28.2886	16.6523	5.9496	4.6632	3.6059	6.4956	0	7.0624	10.0513	11.273	0	13.2494
Negative	2.2669	173.041	2.2669_173.0408	0	0	0	0	0	0	0	0	0	0	0	0	0	0	0	0	0	0	0	0	0	0	0	0	0	0.7324	2.2998	0	1.7796	0.6564	0	0	0	0	0	0	0	0	0	0
Negative	1.9701	173.044	1.9701_173.044	0	0	0	0	0	3.984	0	0	3.0183	1.156	0	0	0	0	0	0	0	0	1.299	0.898	0	0	0	0.5793	0	2.2474	4.6348	5.0228	3.8895	0	0	3.0593	0	0	0	0	1.2845	2.0068	1.432	0
Negative	2.6081	173.045	2.6081_173.0447	0	0	0	0	0	0	0	0	0	0.5171	3.8307	0	4.1136	0	5.4359	1.5642	2.5563	0.9406	2.1547	1.0513	4.1599	4.134	6.0019	5.1203	3.5615	5.6412	9.7169	6.3677	6.3702	5.8787	0	0	0	0	0	1.1183	1.3123	0	1.2207	0.3169
Negative	2.0713	173.045	2.0713_173.0449	4.0219	3.0878	1.8434	3.7421	3.8528	0	0	0	0	0.6194	7.6614	3.0654	6.881	3.9362	5.2918	0	0	0	2.7678	1.4384	8.0908	8.5302	10.3244	9.0097	8.1791	2.9976	4.6348	0	4.0581	2.2834	5.6247	4.7436	3.6871	5.1457	0	0	0	2.0068	0	0
Negative	2.0186	653.177	2.0186_653.1765	0	0	0	0	0	0	0	0	0	0	0	0	0	0	0	0	0	0	0	0	0	0	0	0	0	0	0	0	0	0	0	0	0	0	0	1.7234	1.3445	1.9337	2.228	1.4412
Negative	2.199	653.26	2.199_653.2604	0	0	0	0	0	0.294	0	0.4432	0.2207	0	0	0	0	0	0	1.7447	0.4958	0.526	0.6327	0.7944	0	0	0	0	0	1.1407	2.1051	1.2683	2.0346	1.0108	0	0	0	0	0	0.4236	0.356	0	0.4182	0.5853
Negative	2.8865	655.151	2.8865_655.1506	0	0	0	0	0	0	0	0	0	0	0	0	0	0	0	0	0	0	0	0	8.147	7.6939	9.7239	8.5936	7.8072	2.5073	12.8364	10.7394	9.4103	2.4579	0	0	0	0	0	0	0	0	0	0
Negative	4.3984	655.28	4.3984_655.2804	0	0	0	0	0	1.9096	0.6422	2.5267	4.2455	2.6275	0	0	0	0	0	0	1.6413	2.3966	3.3562	6.2821	0	0	0	0	0	0	0	0	0	0	0	0	0	0	0	1.2617	2.0732	2.3031	1.0777	2.6581
Negative	6.2287	655.332	6.2287_655.3321	0	0	0	0	0	0	0	0	0	0	0	0	0	0	0	0	0	0	0	0	0	0	0	0	0	1.5444	3.4465	3.0523	1.927	2.6613	0	0	0	0	0	0.6165	0.5859	0	0.8513	2.4049
Negative	4.3441	657.144	4.3441_657.1445	5.2452	4.0942	4.6526	7.4289	5.6705	1.7953	2.4839	2.9094	2.3484	2.1898	0	4.2445	2.9658	2.6104	2.6604	0	2.2636	2.2462	0	2.0326	0.9862	0	1.842	0	1.6714	0	0	0	0	0	0	0	0.9355	0.9231	0	0	0	0	0	0
Negative	4.5852	657.144	4.5852_657.1444	0	0	0	0	0	0	0	0	0	0	0	2.5107	0	3.7861	3.7468	0	2.3477	0	1.8962	0	0	0	0	0	0	0	0	0	0	0	0	0	0	0	0	0	0	0	0	0
Negative	4.0575	657.182	4.0575_657.1818	0	1.0775	2.3412	3.2039	1.8701	2.4261	0	0	3.6838	1.7167	4.1861	1.8844	4.0325	5.8954	0	0	0	0	0	0	0	0	0	0	0	0	0	0	0	0	1.679	0	0	0	0	0	0	0	0	0
Negative	2.2939	657.185	2.2939_657.1852	0	0	0	0	0	0	0	0	0	0	0	0	0	0	0	0	0	0	0	0	0	0	0	0	0	0.6909	1.5252	1.6348	2.3255	0	0	0	0	0	0	0	0.9292	1.4457	1.9914	1.847
Negative	4.2101	657.186	4.2101_657.1856	0	0	0	0	0	2.9524	2.4349	0	3.9639	2.0413	3.9296	0	4.5273	5.9937	0	1.4561	0	0	0	2.3687	0	0	0	0	0	0	0	0	0	0	0	0	0	0	0	0	0	2.3003	0	0
Negative	4.1369	657.296	4.1369_657.296	0	4.3203	0	0	4.4925	0.9077	0	0.4512	6.2364	3.6427	6.3938	0	5.2299	4.3102	0	0	2.5953	1.2314	3.2302	3.2968	0	0	0	0	0	0	0.3386	0	0	0.4984	0	0	0	0	0	0.5909	0.4374	7.136	1.3747	12.9149
Negative	7.315	657.349	7.315_657.3492	0	0	0	0	0	0	0	0	0	0	0	0	0	0	0	0	2.0368	1.8871	0	0	0	0	0	0	0	0	0	0	0	0	0	1.3511	0	0	1.751	0	0	0	1.1728	0
Negative	5.4161	659.139	5.4161_659.1391	6.4685	0	3.2934	3.6042	5.6182	9.2507	7.204	10.0104	13.4097	7.0345	0	3.441	5.1212	5.43	8.4589	7.7132	6.1172	8.0429	13.8428	9.8185	0	0	0	0	0	0.3316	3.4276	2.1154	1.7581	0.65	0	0	0	0	0	1.7048	1.6539	2.2304	0.5524	3.3326
Negative	3.2632	661.272	3.2632_661.272	0	0	0	0	0	0	0	0	0	0	0	0	0	0	0	1.0794	0	0	0	0.4533	0	0	0	0	0	1.2136	1.3777	1.8923	2.2939	1.3429	0	0	0	0	0	0	0	0	0	0
Negative	5.7152	661.289	5.7152_661.2887	0	0	0	0	0	0	0	0	0	0	0	0	0	0.257	0	0	0	0	0	0	0	0	0	0	0	7.409	0	0.278	0	1.7472	0	0	0	0	0	0	0	0	0	0
Negative	0.4217	662.83	0.4217_662.8301	1.5376	0.7808	0	0.2808	0.7903	2.46	1.5004	1.0919	2.8794	2.4907	1.7459	1.4305	3.1072	3.1253	2.2262	1.4504	1.6041	0	1.1249	1.585	0	1.6858	3.4681	1.9097	2.2455	1.4976	0.8139	0.8726	1.5758	1.48	1.5034	2.5835	2.8392	2.561	2.9659	0	1.3971	1.1156	0	0.6205
Negative	3.7224	173.081	3.7224_173.0808	0	0	0	0	0	4.9916	2.8279	2.9687	3.2153	3.9367	0	0	0	0	2.7496	10.5851	5.4782	8.6374	6.924	6.3665	0	0	0	0	0	0	0	0	0	0	0	0	0	0	0	0	0	0	0	0
Negative	3.5956	173.081	3.5956_173.0813	0	0	0	0	0	1.8403	0.9883	1.2343	1.0041	0	0	0	0	0	0	3.4621	2.3752	3.5215	2.3802	2.6684	0	0	0	0	0	0	0	0	0	0	0	0	0	0	0	0	0	0	0	0
Negative	0.4655	173.106	0.4655_173.1057	1.8365	0	0.69	1.1793	1.0335	0	4.3097	2.8017	0	0	0.6677	9.3458	0	0.4497	1.1734	0	0	0	0	0	0	1.3553	0	0.9784	1.4647	5.8041	0	0	0	1.1673	0	0	0.4001	0	0.4238	0	0	0	0	2.0666
Negative	0.44	174.956	0.44_174.9555	16.0746	14.7469	19.1723	8.3368	11.5122	25.3541	18.7275	16.7457	39.188	21.4033	23.3812	18.1321	21.1814	27.5622	23.0721	13.6429	19.1722	15.3935	14.8789	14.3121	23.1288	19.1714	25.7306	21.6837	22.6946	18.2892	16.1192	16.7938	24.2729	17.3683	16.1014	23.6908	25.3814	22.4533	26.38	30.7955	23.8278	14.7501	16.1667	8.8063
Negative	0.5236	175.022	0.5236_175.0218	58.6032	111.794	145.526	26.0926	46.9442	0.3837	0.7513	0	2.4028	0.3026	41.1774	43.5348	24.8074	6.3934	2.4453	0	7.3128	0	0	0.3875	36.0718	60.9428	71.6348	40.5507	54.614	1.9252	25.9377	19.3216	32.4054	5.7498	36.58	48.9703	52.6184	61.9074	9.1727	3.0767	3.5188	0.3592	22.6098	0.6601
Negative	0.6306	175.023	0.6306_175.0231	3.8074	21.4972	25.157	2.1686	2.9931	0.213	0	0	1.2383	0.5418	4.4694	3.222	2.8743	0.7877	0	0.3558	2.1087	0	0.3465	0.4304	2.8996	11.5023	13.0337	4.2804	6.7446	0.9972	0	8.8769	10.06	2.9585	4.3651	3.8121	1.8735	7.4297	0.7408	0	0.7621	0.299	6.4879	0
Negative	2.2706	175.04	2.2706_175.0397	4.1594	3.3239	2.6428	2.1784	3.7314	0	0	0	0	0	6.3092	0	7.6852	5.0306	4.3304	0	0	0	0	0	9.225	4.1017	7.7709	4.0796	8.2938	0	0	0	0	0	5.6732	6.9914	4.8398	8.1202	7.2942	0	0	0	0	0
Negative	1.9779	175.06	1.9779_175.06	0	2.3933	2.4322	1.7342	2.5696	0	0	0	0	0	0	6.5161	0	0	0	2.7784	0	0	0	0	0	0	0	0	0	0	0	0	0	0	0	0	0	0	0	0	0	0	0	0
Negative	0.956	175.06	0.956_175.0603	1.3322	2.4705	4.4184	2.0593	0.9028	2.3612	3.5321	2.4135	2.3209	4.182	0	0	0	0	0	0	2.5762	3.2411	1.665	2.2356	0	0	0	0	0	0	0	0	0	0	0	0	0	0	0	0	0	0	0	0
Negative	1.2266	175.06	1.2266_175.0605	0	0	0	0	0	0	1.4909	1.9723	0	0	0	0	0	0	0	0	0	2.7949	1.2122	1.6586	0	0	0	0	0	0	0	0	0	0	0	0	0	0	0	0	0	0	0	0
Negative	3.0698	175.113	3.0698_175.1133	0	0	0	0	0	0.7779	2.3049	2.035	0	0	0	0	0	0	0	0	0	0	0	0	0	0	0	0	0	0	0.5899	0	1.5764	0.979	0	0	0	0	0	0	0	0	0	0
Negative	1.6959	177.019	1.6959_177.0186	0	0	0	0	0	0	0	0	0	0	0	0	0	0	0	0	0	0	0	0	7.949	4.5012	4.8975	4.0347	3.8669	0	0	0	0	0	3.7551	2.9349	2.2267	0	0	0	0	0	0	0
Negative	0.492	177.038	0.492_177.0384	13.974	12.6061	13.7887	10.8229	15.9609	1.7072	4.6151	4.8181	4.3466	1.8887	18.4326	18.7325	16.7707	22.7125	19.3863	4.1357	6.2062	3.4835	2.9269	2.7726	18.4609	14.6868	15.2358	14.7811	19.6392	2.6711	3.3504	3.6162	4.2402	2.7955	12.4069	15.2933	34.6911	14.9855	28.895	9.6713	6.6991	3.0962	3.2012	1.8371
Negative	0.5722	177.043	0.5722_177.0428	0.7749	0	0	0.5993	0.6317	3.867	5.0605	4.8181	6.2492	2.9344	0	0	0	0	0	4.6747	6.2062	6.1459	5.3089	5.2223	0	0	0	0	0.8809	2.7957	4.148	5.0553	5.5688	3.7301	0	0	0	0	0	9.6713	9.2784	3.0962	5.2511	4.3196
Negative	1.9557	177.053	1.9557_177.053	18.1956	10.3147	18.0586	14.9413	15.0149	5.8511	4.258	3.9101	6.5728	2.9728	18.6082	8.4743	16.3575	19.9996	11.6376	0	4.8182	4.0422	4.1484	3.7818	3.6657	4.0861	3.6408	4.46	3.7382	0	0	0	0	0	9.5992	8.8904	6.2558	8.7157	10.7415	2.9195	3.6519	6.1659	5.9414	4.89
Negative	0.5285	177.912	0.5285_177.9122	1.8692	1.2129	2.2046	1.8636	1.6428	0	0	0	0	0	1.9842	1.7602	2.4241	3.8186	3.4301	0	0	0	0	0	2.3326	1.76	2.4416	3.0076	1.4965	0	0	0	0	0	1.9549	1.3975	2.5975	2.4376	3.2763	0	0	0	0	0
Negative	5.4704	663.288	5.4704_663.2875	0	0	0	0	0	0	0	0	0	0	0	0	0	0	0	0	0	0	0	0	0	0	0	0	0	0	0.399	0	0	0	0	0	0	0	0	4.2601	0	0	3.6801	0
Negative	0.4762	665.188	0.4762_665.1879	0.4694	0	0.9546	0.6864	0	1.0537	0	0	1.0918	0.1817	3.7629	0	9.9821	11.6232	0.5512	0	0	0.3289	0	0.4219	9.2628	0	11.557	0	0.8828	0	0	0.6671	0.8087	0.2957	9.4277	0	0	14.2317	6.5588	10.7583	0	2.2844	0	4.109
Negative	0.4806	665.213	0.4806_665.2132	0.4694	0	0.7768	0.6864	0.9056	1.0537	0	0	1.0918	1.4249	3.4886	2.2674	9.9821	9.3454	0.5512	0.2006	0.3852	0.3289	0.2015	0.4219	0	1.8822	11.557	3.8827	0.8828	0.1118	0	0.6671	0.8087	0.2957	15.4168	8.5501	5.3072	14.2317	6.5588	10.7583	6.3233	2.2844	0	4.109
Negative	2.0348	665.228	2.0348_665.2276	2.9534	1.7944	0	2.5105	3.3693	0	0	0	0	0	0	1.0936	2.6257	0	1.2985	0	0	0	0	0	2.7583	2.7035	0	1.6908	2.3393	0	0	0	0	0	0	0.8762	0.8004	0	0	0	0	0	0	0
Negative	2.1642	665.236	2.1642_665.2357	0	0	0	0	0	1.755	0	1.9258	2.2729	2	0	0	0	0	0	0	1.3963	0	0	0	0	0	0	0	0	0	0	0	0	0	0	0	0	0	0	0	0	0	0	0
Negative	2.5641	665.241	2.5641_665.2414	0	0	0	0	0	0	0	0	0	0	0	0	0	0	0	0	0	0	0	0	0	0	0	0	0	2.6799	0	0	0	4.4842	0	0	0	0	0	0	0	0	0	0
Negative	3.6114	665.25	3.6114_665.2497	0	0	0	0	0	0	0	0	0	0	0	0	0	0	0.8975	0	0	0	0	0	0	0	0	0	0	0	0	0	0	0	0	0	0	0	0	0	0	0	2.0202	1.6292
Negative	3.7076	665.271	3.7076_665.271	0	0	0	0	0	0	0	0	0	0	0	0	0	0	0	0	0	0	0	0	0	0	0	0	0	3.5642	0	1.7627	0	3.5031	0	0	0	0	0	0	2.9813	2.625	3.5595	1.952
Negative	3.5239	665.28	3.5239_665.2801	0	0	0	0	0	0	7.2259	5.6559	0	0	0	0	0	0	0	0	0	0	0	0	0	0	0	0	0	30.6159	2.1721	3.4624	0	13.9093	0	0	0	0	0	0	3.9516	0	0	0
Negative	3.4091	665.284	3.4091_665.2838	0	0	0	0	0	0	0	0	0	0	0	0	0	0	0	0	0	0	0	0	0	0	0	0	0	8.8295	0	0	0	4.6191	0	0	0	0	0	0	0	0	0	0
Negative	3.295	665.287	3.295_665.287	0	0	0	0	0	0	1.5847	0	0	0	1.7449	0	0.9211	0	0	0	0	0	0	0	0	0	0	0	0	5.2852	0	0	0	3.1974	0	0	0	0	0	0	0	0	0	0
Negative	4.5969	665.373	4.5969_665.3734	0	0	0	0	0	1.1242	2.0969	1.0881	1.2698	0.919	0	0	0	0	0	2.1611	0.8921	1.8753	0	1.0442	0	0	0	0	0	0.8294	0	0	0	0.3862	0	0.2561	0	0.1154	0	0	0	0	0	0
Negative	5.2846	665.374	5.2846_665.3737	0	0	0	0	0	0	0	0	1.2686	0	0	0	0	0	0	0	1.0695	0	0	0	0	0	0	0	0	2.0375	3.7101	1.9989	2.1488	1.859	0	0	0	0.3021	0	0	0	0	0.6316	0
Negative	3.2231	667.156	3.2231_667.1558	3.6522	0	0	4.0268	2.9294	0	0	0	0	0	0	0	0	0	0	0	0	0	0	0	5.1961	3.8422	7.4333	5.6144	3.7073	2.6592	3.2595	3.3204	3.2883	3.4585	0	0	0	0	0	0.1637	0	0	0	0
Negative	4.291	667.186	4.291_667.1862	6.0909	3.1036	9.8012	9.1616	3.0079	2.6379	0	0	2.8043	2.2767	0.5079	0	0	1.2157	0	0	0	0	0	0	0	0.4477	0	0.311	0	0	0	0	0	0	0	0	0	0	0	0	0	0	0	0
Negative	2.7104	667.257	2.7104_667.2569	0	0	0	0	0	0	2.3107	1.469	0.3712	0.5998	0	0	0	0	0	0	0	0.411	0	0	0	0	0	0	0	3.5722	0	0	0	5.3921	0	0	0	0	0	0	0	0.3767	0	1.236
Negative	1.918	179.034	1.918_179.0335	0	0	0	0	0	0	0	0	0	0	0	0	0	0	0	0	0	0	0	0	0	0	0	0	0	0	0	0	0.9421	0	10.7269	9.5071	0	9.41	7.1494	0	0	0	0	0
Negative	1.512	179.034	1.512_179.0342	10.7705	8.9756	6.0513	9.4659	7.2278	2.3668	0	0	0	0	8.0393	0	8.859	0	0	0	3.7511	0	0	0	11.6033	10.8528	14.0777	9.6128	15.7134	1.7497	3.6635	4.5512	0	1.9355	0	0	0	0	0	0	0	0	0	0
Negative	2.4999	179.039	2.4999_179.039	3.1063	2.3531	0	0	3.6987	0	0	0	0	0	0	0	0	0	0	0	0	0	0	0	6.1435	3.4529	5.6123	0	5.4641	0	0	0	0	0	0	4.624	0	0	0	0	0	0	0	0
Negative	2.3532	179.053	2.3532_179.0526	0	2.437	1.6345	1.9915	2.6555	0	0	0	0	0	3.5451	3.1037	0	3.7762	3.5894	0	0	0	0	0	0	1.6238	0	0	0	0	0	0.3646	0	0	1.5097	0	0	1.4754	1.69	0	0	0	0	0
Negative	0.5065	179.056	0.5065_179.0563	13.1582	12.8539	13.705	13.4472	12.2509	10.1938	6.2046	6.1484	11.308	6.3655	8.6415	9.1887	12.3941	11.3377	14.7566	5.3395	7.6803	7.9006	5.9251	7.832	10.2831	10.1705	10.7303	10.1492	9.0443	4.6046	7.8909	7.7343	7.8568	4.6599	14.2664	14.8419	26.721	14.3333	17.2488	10.8086	11.3624	7.6112	7.4063	10.5584
Negative	0.6037	179.059	0.6037_179.0586	0	0	0	0	0	0	0	4.298	0	4.3124	0	0	0	2.0036	0	3.2113	0	0	3.5197	4.7073	0	0	0	0	0	2.563	5.1178	0	0	2.2427	0	0	0	0	0	0	5.8538	0	0	7.4322
Negative	1.3396	180.029	1.3396_180.0289	0	3.4793	3.4748	3.0986	1.6837	0	0.5857	0.5803	0	0.6995	0	0.6449	0	0	0	0	0	0	0.1575	0	0	0	0	0	0.4536	0	0	0	0	0	0	0	0	0	0	0	0	0	0	0
Negative	0.4765	180.913	0.4765_180.9129	0	0	0	0	0	0.4717	0.5253	0	0.5096	0.5498	0	0	0	0	0	2.1928	1.6978	0.782	1.1612	1.6024	0	0	0	0	0	0.5111	0.7663	0.643	0.5877	0.3695	0	0	0	0	0	0	0.4366	1.0446	0.7138	1.1167
Negative	0.4519	180.972	0.4519_180.972	0	0	0	0.2148	0.2704	0	0	0	0	0	0	0.3672	0	0	0.8067	0	0	0	0	0	0.9031	1.8505	0	0.7366	1.7063	0	0	0	0	0	1.5514	3.3601	5.682	3.4951	5.9459	0	0	0	0	0
Negative	3.3121	181.05	3.3121_181.0497	0	0	0	0	0	0.8666	1.183	0.8491	0	0	0	0	0	0	0	0	0	1.2591	0	0	0	0	0	0	0	0.8644	0.573	0.5492	0.5781	0.8427	0	0	0	0	0	2.4918	1.9673	1.519	3.4069	1.4616
Negative	2.9162	183.065	2.9162_183.0655	5.0231	7.3258	10.3318	6.7339	4.7926	2.1761	3.2606	2.6867	0	2.9938	7.3911	5.1026	5.1428	11.1693	4.549	0	2.1062	2.5026	0	0	6.2313	6.0745	10.6792	8.5766	4.4209	0	0	2.1462	2.1505	2.4493	0	0	0	0	0	0	0	0	0	0
Negative	5.8853	183.139	5.8853_183.1388	0	3.1271	4.209	0	0	2.0958	1.8218	3.4383	2.3251	2.4222	3.3589	0	3.4302	0	2.8123	0	2.6246	2.6295	3.7384	3.1549	0	0	0	0	3.8541	1.0323	0.4213	0.3445	0.7652	2.8732	0	0	0	0	0	1.0885	3.5468	8.729	1.7135	11.3948
Negative	0.5946	184.986	0.5946_184.9861	0.9692	3.1438	5.4957	0	0	2.022	0	0	7.2237	1.6619	1.8819	0	2.8234	1.47	0	0	3.6116	3.1789	0	2.2648	0	0.5694	2.9679	1.8427	0.7069	0	2.9654	0	2.5677	0	2.8199	4.0595	0	5.6578	1.5111	5.0763	0.6244	2.1085	0	0
Negative	0.7677	184.988	0.7677_184.988	0	2.5414	2.9675	0.9996	0	0	0	0.3567	2.5958	0.6949	0	0	1.5758	0	0	0	0.8667	0	0	1.5109	0	0	0	0.7242	0	0	0.6904	0	0	0	1.616	0	0	2.7092	0	0	0	1.079	0	0
Negative	1.1873	187.024	1.1873_187.0235	0	0	0	0.4368	0	0	0	2.8432	1.5233	0.8912	0	0	0	0	0	0	0.6275	1.21	3.0113	4.1354	0	0	0	0	0	0	0	0	0	0	0	0	0	0	0	2.8282	3.7977	0.9905	1.3586	6.1687
Negative	1.2969	187.024	1.2969_187.0245	1.0963	1.2723	1.3234	2.4656	0.8916	1.9731	0	1.9686	1.7312	1.9314	0.8759	0.8549	0	0.5875	0.6504	0	1.31	0.9664	2.2509	1.2308	0.8193	0.9643	0.5151	0.9784	0.7776	0	0	0	0	0	1.1695	1.1181	0.77	1.2692	1.1301	3.8298	3.0443	2.5597	2.3316	2.886
Negative	4.8007	667.388	4.8007_667.3879	0	0	0	0	0	1.3561	0	0	0	1.087	0	0	0	0	0	0	1.1196	2.214	1.1693	2.5049	0	0	0	0	0	0	0	0	0	0	0	0	0	0	0	0	0	0.631	0	0
Negative	5.2459	667.39	5.2459_667.3897	0	0	0	0	0	0	0	0	0	0	0	0	0	0	0	0	0	0	0	0	0	0	0	0	0	0	2.8013	1.722	1.6551	0	0	0	0	0	0	0.4864	0	0.6508	0	0
Negative	3.3712	669.17	3.3712_669.1698	0	0	0	0	0	0	0	0	0	0	0	0	0	0	0	0	0	0	0	0	0	0	0	0	0	0	6.967	4.3551	4.6899	2.3529	0	0	0	0	0	0	0	0	0	0
Negative	3.4774	669.179	3.4774_669.179	0	0	0	0	0	3.0136	2.4474	0	3.6584	1.9067	0	0	0	0	0	0	0	0	0	0	0	4.6621	0	0	0	0	3.4379	1.1803	1.6452	0	0	0	0	0	0	0	0.7583	5.4479	3.1057	2.1268
Negative	3.5611	669.181	3.5611_669.1812	5.0198	4.112	8.0313	7.9357	3.9521	3.0136	0	0	3.6584	1.9547	5.4457	3.3785	5.1967	7.5998	3.037	0	0	0	0	0	8.642	5.2746	9.7033	8.0114	5.3221	0	3.4379	0	0	0	9.1653	6.2983	4.4853	8.095	4.4077	0	0	5.4479	3.1057	2.1746
Negative	2.41	669.232	2.41_669.2324	0	0	0	0	0	0.6681	0	0	0.7607	0.9125	0	0	0	0	0	0.9463	0	1.1643	0.5559	1.232	0	0	0	0	0	0.6066	2.1698	2.0112	2.1347	1.4342	0	0	0	0	0	0	0	0	0	0
Negative	2.0654	671.198	2.0654_671.198	0	0	0	0	0	0	0	0	0	0	0	0	0	0	0	0	0	0	0	0	0	0	0	0	0	0	0	0	1.6971	4.8255	0	0	0	0	0	0.2503	0.5128	0	1.0607	0.5088
Negative	2.607	671.203	2.607_671.2033	0	0	0	0	0	0	0	0	0	0	0	0	0	0	0	0	0	0	0	0	0	0	0	0	0	5.5992	1.5394	1.8604	4.6914	15.1151	0	0	0	0	0	0	0	0	0	0.577
Negative	3.2304	671.276	3.2304_671.2764	0	0	0	0.2573	0	8.0644	0.8672	1.5992	7.2653	5.2256	8.5547	0	9.3955	14.3921	2.4963	17.5169	10.3826	9.2648	13.5081	3.9943	0	0	0	0	0	0	0	0	0	0	0	0	0	0.1431	0	0	0	0	0	0
Negative	2.704	671.291	2.704_671.2914	0	0	0	0	0	0	0.8729	1.3944	0	1.5673	0	0	0	0	0	0	0	0	0	0	0	0	0	0	0	0.6183	0	0	0.4776	1.4868	0	0	0	0	0	0	0.3088	0	0.8669	1.6151
Negative	2.0451	673.216	2.0451_673.2156	0	0	0	0	0	0	0	0	0	0	0	0	0	0	0	0	0	0	0.495	0	0.3494	0	0	0	0	2.7532	0.5277	0.5021	0.7022	2.3681	0	0	0	0	0	0.3692	0.3614	0.3465	1.2026	1.7985
Negative	5.5311	673.288	5.5311_673.2875	0	0	0	0	0	0.1086	1.519	0.6885	0	0	0	0	0	0	0	1.3067	0.8037	0.5722	0.7861	0.3622	0	0	0	0	0	4.475	0	0	0	1.2761	0	0	0	0	0	2.4177	4.1035	0	0.725	0.4163
Negative	5.5574	675.248	5.5574_675.2478	0	0	0	0	0	0	0	0	0	0	0	0	0	0	0	0	0	0	0	0	0	0	0	0	0	0	0	0	0	0	0	0	0	0	0	3.7228	0	0	3.0974	0
Negative	7.1474	675.252	7.1474_675.252	0	0	0	0	0	0	0	0	0	0	0	0	0	0	0	0	0	0	0	0	0	0	0	0	0	0	0	0	0	0	0	0	0	0	0	6.1639	0	0	3.5552	0
Negative	3.9403	675.262	3.9403_675.262	0	0	1.2319	0	0	0	0	0	0	0	0	0	0.7692	1.5406	0	0	0	0	0	0	0	0	0	0	0	5.6874	0	0	0	3.6043	0	0	0	0	0	0	0	0	0	0
Negative	4.2764	675.265	4.2764_675.2651	0	0	0	0	0	0	0	0	0	0	0	0	0	0	0	0	0	0	0	0	0	0	0	0	0	4.8815	0	0	0	2.0943	0	0	0	0	0	0	0	0	0	0
Negative	1.0641	187.025	1.0641_187.0247	0	0	0	0	0	0	0	0.7016	0	0	0	0	0	0	0	0	0	0	0	1.2594	0	0	0	0	0	0	0	0	0	0	0	0	0	0	0	0	1.3191	0.5079	0	2.8893
Negative	0.9833	187.027	0.9833_187.0273	0	0	0	0	0	0	0	0	0	0	0	0	0	0	0	0	0	0	0	1.2594	0	0	0	0	0	0	0	0	0	0	0	0	0	0	0	0	1.012	0	0	1.8828
Negative	3.8139	187.096	3.8139_187.0963	0	0	0	0	0	4.8402	3.3951	3.515	2.8979	2.9202	0	0	0	0	2.6902	13.0418	3.8075	6.5146	6.9754	2.9952	5.8452	0	0	5.0786	0	1.8303	3.4005	2.2909	3.1216	1.5353	3.906	0	0	0	0	2.9785	2.8251	4.9465	2.7029	4.0789
Negative	0.4672	187.997	0.4672_187.9966	4.0525	8.1807	9.1176	4.0032	5.0982	0	0	0	0	0	4.3827	1.0777	1.7617	1.3906	4.0169	0	0	0	0	0	2.7758	4.8726	2.1872	3.7708	6.2123	0.2617	0	0	0	0	0.7982	1.6359	1.6008	1.6539	1.9776	0	0	0	0	0
Negative	0.6868	191.018	0.6868_191.0184	20.3072	42.9271	51.457	24.7266	27.1676	51.2996	50.2907	48.139	46.8103	33.0404	44.0833	43.2658	47.778	50.2911	38.2579	44.341	40.9821	38.6406	41.47	53.1539	52.6458	53.7914	68.542	44.2623	35.7431	55.3445	80.9224	52.7764	62.0823	36.8036	53.2111	47.9685	34.5681	62.4441	44.1624	64.2689	61.8858	41.7814	39.52	31.159
Negative	0.8667	191.02	0.8667_191.0204	0.7774	0	1.2281	0	0	2.4378	1.5575	1.5021	0	2.794	1.531	1.0628	0	1.6382	0	1.8199	1.958	1.9926	1.9952	2.8212	0	0	0	2.2888	0	0	0	3.7439	4.5555	6.0917	1.8472	1.1359	0	0	0	2.9786	3.3193	0	2.1691	2.1745
Negative	0.5417	191.02	0.5417_191.0204	23.5556	29.4441	33.0541	23.9671	25.8047	29.2079	15.3642	11.1079	32.675	23.7801	36.4012	30.0103	33.0582	48.9715	36.2338	19.0497	20.5281	14.5391	22.576	13.0851	40.0929	44.8867	60.0637	60.2547	39.5267	22.2454	70.047	50.8705	47.8115	21.8232	45.798	37.4561	31.6069	49.5965	36.9136	46.2724	36.5078	16.4613	26.5968	0
Negative	2.3467	191.024	2.3467_191.0235	0	0	0	0	0	0	0	0	0	1.8317	0	0	0	0	0	1.2301	0	0	0	0	0	0	0	0	0	0	2.4393	2.6938	1.6693	0	0	0	0	0	0	0.8518	0.8335	0	1.8666	0.6125
Negative	2.431	191.028	2.431_191.0279	0	0	0	0	0	0	0	0	0	0	0	0	0	0	0	0	0	0	0	0	0	0	0	0	0	0	0	1.7954	1.9768	0	0	0	0	0	0	0.7493	0.7938	0	0.4465	0
Negative	1.9286	191.032	1.9286_191.0318	99.9673	76.5167	76.4542	82.5326	84.9346	0	0	0	0	0	86.0936	23.1807	99.7456	42.8834	27.4067	0	0	0	0	1.0487	134.668	42.4448	117.198	98.1524	118.234	3.4164	0	4.7853	0	1.999	126.454	120.608	102.213	168.417	155.55	0	0	0	0	0
Negative	1.344	191.034	1.344_191.0336	0	0	0	0	0	0	0	0	0	0	0	0	0	0	0	0	0	0	0	0	0	0	0	0	0	1.6085	2.0473	0	1.745	0	0	0	0	0	0	0	0	0	0	0
Negative	2.6628	191.052	2.6628_191.0519	0	0	0	0	0	0	0	0	0	0	0	0	0	0	0	0	0	0	0	0	0	0	5.0345	0	4.0664	0	0	0	0	0	1.2834	0	0	0	0	0	0	0	0	0
Negative	1.9166	191.053	1.9166_191.0525	99.8103	76.5167	76.4301	82.3335	84.9346	38.71	7.7123	5.7752	39.7588	11.03	86.0936	23.1807	99.6139	42.8834	27.4067	4.9401	15.691	8.5084	5.026	6.0031	134.52	42.5713	116.857	98.3054	118.302	0	50.0028	46.0612	40.2278	0	126.225	120.406	102.143	168.179	155.443	38.6823	31.9315	48.2653	44.5925	23.3172
Negative	0.5053	191.053	0.5053_191.0527	21.114	43.0822	51.7043	15.7128	26.0788	6.3338	0.1556	0.1036	0	0.668	28.0092	5.1291	20.0631	21.4024	13.2027	8.478	0	1.8795	1.4797	0	22.1876	14.0865	37.0167	26.2588	14.2804	0.7618	60.3865	0	0	0.3572	19.9429	19.6326	12.825	17.3659	12.417	0.756	7.9781	13.0035	17.9093	3.3889
Negative	1.6658	191.053	1.6658_191.0527	0	0	0	0	0	4.1728	0	0	4.0322	0	0	0	0	0	0	0	1.3655	0	0.8165	0	0	0	0	0	0	0	8.8813	4.7093	0	0	0	0	0	0	0	3.8626	0	6.963	3.7355	1.4334
Negative	1.5108	191.053	1.5108_191.0529	18.935	0	0	16.5452	0	3.8753	0	0	4.6803	1.8042	0	0	0	0	0	0	0	0	0	1.4437	0	0	0	0	0	5.7407	6.5634	11.1117	2.5776	4.4833	0	0	0	0	0	3.1229	2.9994	2.9534	3.9683	0
Negative	4.4994	675.265	4.4994_675.2653	0	0	0	0	0	0	0	0	0	0	0	0	0	0	0	0	0	0	0	0	0	0	0	0	0	6.696	0	0	0	4.3676	0	0	0	0	0	4.1582	9.1302	0	0	0
Negative	3.862	675.279	3.862_675.2789	0	0	0	0	0	1.7485	0	2.912	1.3058	0	0	0	0	0	0	0	0	0	0	0	0	0	0	0	0	2.9191	0	0	0	2.1582	0	0	0	0	0	0	0	0	0	0
Negative	0.3845	675.361	0.3845_675.3607	0	0.7899	0.435	0.6328	0.301	1.291	2.6101	6.6522	4.5512	3.5769	0.4073	0.4236	0.6127	0.5875	0.1956	0	3.2234	3.8241	4.5649	1.954	0	0.6539	1.128	0.9478	1.296	1.8976	0	0	0.807	2.1462	0	0.3622	0	0.3462	0.0942	10.1478	2.333	2.436	0	7.3209
Negative	7.8425	675.41	7.8425_675.4102	0	0.4314	0.8078	0	0	2.3468	3.4875	2.7853	1.194	2.7313	0	0	0.4902	0	0	0.9262	0.6852	0.9427	0.8569	0.8295	0	0	0.6868	0	0	3.0586	0.9884	0	1.0394	4.6394	0	0	0	0	0	0	0.576	1.1156	0.9421	0.7886
Negative	3.0174	676.073	3.0174_676.0727	2.0317	1.2852	1.9706	1.5592	1.3865	0	0	0	0	0	0.7873	0.2398	0.5524	0.768	0.3931	0	0	0	0	0	0	0.9368	0.9039	1.0977	0.8349	0	0	0	0	0	2.6086	2.1609	3.1261	4.3356	4.0134	0	0	0	0	0
Negative	1.3097	676.169	1.3097_676.1693	0	0	0	0	0	2.2131	0.369	1.6193	1.6368	5.718	0	0	0	0	0	0	0	0.4548	0.256	0.8465	0	0	0	0	0.1944	0.1717	0	0	0	0	0	0	0	0	0	0	0	0.4425	0	0
Negative	2.9304	677.17	2.9304_677.1704	0	0	0	0	0	0	0	0	0	0	0	0	0	0	0	0	0	0	0	0	0	0	0	0	0	0.2979	2.462	3.0608	2.8603	0	0	0	0	0	0	0	0	0	0	0
Negative	2.7328	677.218	2.7328_677.2185	0	0	0	0	0	1.6314	3.0772	5.3852	3.7384	5.5256	0	0	0	0	0	2.5225	1.5205	1.8002	2.479	2.2876	0	0	0	0	0	1.5931	0	2.1725	1.1036	7.3811	0	0	0	0	0	0	1.0408	0	2.477	2.9734
Negative	3.4254	677.229	3.4254_677.2287	0	0	0	0	0	0	0.6092	0.8285	0	0	0	0	0	0	0	0	1.6929	0	1.4679	0.9716	0	0	0	0	0	2.2873	1.6067	1.1517	0.9197	2.6927	0	0	0	0	0	0.8497	0.7851	2.0038	0	2.8256
Negative	2.7405	677.246	2.7405_677.2461	0	0	0	0.156	0	0	0	0	0	0	0	0	0	0	0	2.5225	1.1043	1.8002	2.0259	1.4248	0	0	0.2664	0	0	2.9078	2.4164	2.1725	3.3833	7.3811	0	0	0	0	0	0.9631	1.3148	1.1668	2.477	1.8564
Negative	2.7457	677.264	2.7457_677.2644	0	0	0	0	0	0	0	0	0	0	0	0	0	0	0	0	0	0	0	0	0	0	0	0	0	2.9078	2.4164	2.1725	3.3833	0	0	0	0	0	0	0.9631	1.3148	1.1668	0	1.8564
Negative	5.9319	677.266	5.9319_677.2665	0	0	0	0	0	0	0	0	0	0.0849	0	0	0	0	0	0	0	0	0	0	0	0.2925	0	0	0	0	0	0	0	0	0	0	0	0	0	25.8146	0	0	19.5928	0
Negative	3.8716	677.279	3.8716_677.2792	0	0	0	0	0	0	0	0	0	0	0	0	0	0	0	0	0	0	0	0	0	0	0	0	0	14.7151	0	0	0	5.7936	0	0	0	0	0	0	2.2872	0	0	0
Negative	4.2517	677.282	4.2517_677.2815	0	0	0	0	0	0	0	0	0	0	0	0	0	0	0	0	0	0	0	0	0	0	0	0	0	11.9134	0	0	0	4.8786	0	0	0	0	0	3.7327	10.1098	0	3.8901	0.9864
Negative	4.1224	677.28	4.1224_677.2798	0	0	0	0	0	0	5.6327	6.6311	0	0	0	7.8269	0	0	5.8113	4.8847	0	1.8888	0	0	0	0	0	0	0	66.7985	2.5147	9.0997	0	41.9785	0	0	0	0	0	9.1364	26.9874	0	8.7572	1.9724
Negative	5.244	677.282	5.244_677.2824	0.3113	0	0	0	0	0.2382	0	0	0	0	0	0	0	0	0	0	0	0	0	0	0	0	0	0	0	2.436	0	0	0	0.8592	0	0	0	0	0	2.8637	0	0	2.1459	0
Negative	1.7579	191.053	1.7579_191.0532	0	0	0	0	0	6.2744	0	0	5.5295	0	0	0	0	0	0	0	1.8528	0	0	0	0	0	0	0	0	0	10.2195	15.453	5.6378	0	0	0	0	0	0	8.7413	4.7551	10.6368	5.9694	0
Negative	2.8015	191.054	2.8015_191.0538	0	0	0	0	0	0	0	0	0	0	0	0	0	0	0	0	0	0	0	0	8.6538	0	18.114	0	5.0057	0	0	2.6432	0	0	3.995	0	0	6.5086	0	0	0	0	0	0
Negative	2.0905	191.054	2.0905_191.054	0	0	0	1.9814	0	0	0	0	0	0	6.8377	0	6.2682	0	0	0	2.9745	0	2.4346	1.2728	7.3361	0	12.8262	8.7155	7.3967	3.8355	4.0782	3.153	2.7398	0	3.8954	3.5243	2.1182	3.4162	0	0	0	0	0	0
Negative	2.3241	191.054	2.3241_191.0544	0	0	14.8104	21.0036	0	12.937	0	0	13.2642	0	17.1072	0	20.3032	0	0	0	4.6246	2.2111	0	0	29.38	0	41.5837	23.3643	30.6511	0	22.5802	22.7052	18.9296	0	42.6229	46.3678	39.6336	44.2879	31.2734	7.9032	11.8368	15.9069	12.7019	7.0621
Negative	2.9738	191.055	2.9738_191.0554	5.3688	6.1982	3.202	4.2705	5.7836	0	0	0	0	0	6.7672	2.4815	7.326	0	4.0143	0	0	0	0	0	9.088	0	13.4961	7.1274	9.5184	0	0	0	0	0	3.6	0	0	6.4398	0	0	0	0	0	0
Negative	2.136	192.042	2.136_192.0421	10.1079	18.2977	20.373	17.2653	12.5212	0.5845	0	0.7483	0.3589	1.2295	0	0	0	0	0	0	0	0	0	0	0	0	0	0	0	0	0	0	0	0	3.5785	4.8083	0	2.4443	0	0	0	0	0	0
Negative	2.2562	192.043	2.2562_192.0429	7.5081	11.6054	12.1147	12.4221	8.2983	0	0	0.8151	0	0.9261	0	0	0	0	0	0	0	0	0	0	0	0	0	0	0	0	0	0	0	0	0	3.8404	0	2.0312	0	0	0	0	0	0
Negative	2.0849	193.048	2.0849_193.0479	57.9755	40.8286	40.6303	36.96	42.9016	16.1559	13.3002	10.8259	17.9169	9.8377	121.073	62.4612	129.05	79.6452	94.0209	27.3517	63.6823	22.3729	47.181	27.0757	146.544	102.358	137.211	116.75	145.462	51.5502	74.7027	57.2181	63.4715	43.7227	23.4832	22.2299	22.0739	27.0149	25.4059	19.0414	11.3713	13.8676	19.7747	13.5831
Negative	1.957	193.048	1.957_193.0484	5.0294	0	0	5.6371	4.3202	3.9804	4.6831	2.051	0	1.9976	2.0305	0.7562	1.7839	0	1.7917	7.492	13.2568	6.6419	0	4.8792	0	11.8609	5.2878	0	0	19.5583	0	33.8209	23.0102	10.2986	3.2782	3.2006	0	0	4.5076	3.7774	3.1095	3.3868	4.0267	2.9026
Negative	1.8822	193.049	1.8822_193.0488	0	0	3.8757	2.6039	0	0	0	2.0412	0	0	0	0	0.6013	0	0.0571	0	8.0608	3.4582	6.1077	2.842	8.025	5.442	2.9182	4.3184	0	13.4226	0	0	0	10.418	0	0	0	0	0	2.0749	1.518	1.9317	3.0267	1.7422
Negative	1.5678	193.049	1.5678_193.0492	0	0	0	0	0	0	0	0	0	0.2985	0	0	0	0	0	0.6441	0.9467	0.89	0	0	0	0.1147	0	0	0	5.6831	0	0	0	2.7705	0	0	0	0	0	0.6112	0	0	0	0
Negative	2.2672	193.049	2.2672_193.0495	28.7781	25.0536	27.1066	24.5147	22.1879	5.4267	3.8657	3.3094	4.9826	5.7039	28.178	11.7949	22.8026	23.709	15.6701	0	0	0	0	0	28.6463	23.9754	21.7746	22.8056	30.0867	0	0	0	0	0	29.728	35.0791	26.3937	32.7517	30.1671	6.0685	7.8313	4.8721	7.7076	5.3289
Negative	1.7145	193.049	1.7145_193.0495	0	1.7942	2.7603	2.0013	0	0	0	1.0476	0	0.4562	0	0	0	0	0	1.7513	5.6935	1.8728	4.7941	2.3092	5.367	3.3678	0	2.1847	0	10.0236	12.7787	8.96	6.6997	6.5567	4.8917	4.0579	0	0	0	2.7784	1.3297	1.854	2.5156	0.331
Negative	1.4095	193.05	1.4095_193.0496	0	0	0	0	0	1.2245	0.8758	0	0	0	5.8949	0	8.1149	6.4164	4.5621	0	5.789	0	2.65	0	0	0	0	0	0	1.8229	0	0	3.2521	0	4.3372	3.7409	3.7846	4.6991	0	0	3.4528	3.0705	3.2947	0
Negative	0.5334	193.052	0.5334_193.0521	1.1065	1.8986	0	1.1934	1.4894	1.5632	0	0	2.3943	0	1.6357	1.2915	2.0969	1.6365	2.0366	2.0965	6.6808	2.1723	4.9708	3.3416	0.9932	1.7118	1.7748	1.7848	1.7704	9.8332	17.3934	15.6405	10.6144	8.2527	0	1.0561	2.9961	1.2571	1.1394	1.7851	0	0	2.178	1.4181
Negative	2.3283	194.044	2.3283_194.0444	7.1242	23.3119	16.1633	12.8537	11.6166	0	0	0	0	0	0	1.4095	0	0.9714	0	0	0	0	0	0	0	3.1655	0	0	0	0	0	0	0	0	0	0	0	0	0	0	0	0	0	0
Negative	4.033	677.282	4.033_677.2824	0	0	0	0	0	0	1.7949	2.6922	0	0	0	0	0	0	0	0	0	0	0	0	0	0	0	0	0	0	0.7972	3.131	0	12.7571	0	0	0	0	0	0	6.3483	0	2.74	0
Negative	3.004	677.292	3.004_677.2924	0	0.2299	0	0	0	0	0	0	0	0	0	0	0	0	0	0	0	0	0	0	0	0.3409	0	0	0	1.512	0	0	0	2.4937	0	0	0	0	0	0	0.8832	0	0.2136	0
Negative	2.3977	678.058	2.3977_678.0581	3.3467	2.3507	2.7042	2.9151	2.3024	0	0	0	0	0	4.0981	2.9302	3.783	4.4135	3.4745	0	0	0	0.253	0	4.2176	2.8947	3.4513	3.7718	3.8092	0	0	0	0	0	1.6831	2.1829	2.4877	2.5802	3.7451	0	0	0	0	0
Negative	4.9661	679.35	4.9661_679.3504	0.2904	0	0	0	0	0	0	0	0	0	0	0	0	0	0	0	0	0	0	0	0	0	0	0	0	1.3615	0.8604	0.9843	0.6966	1.2984	0	0	0	0	0	2.5858	4.5975	0.4474	1.979	2.6746
Negative	1.8504	681.223	1.8504_681.2228	2.804	2.7505	0	3.6114	3.0051	2.7731	0	2.3499	3.8413	2.6985	0	0	4.3001	0	0	0.2354	2.1305	0	0	0	0	2.8372	0	4.905	4.3057	0	0	0	0	2.1121	0	0	0	0	0	0	0	2.1575	2.8235	3.3015
Negative	3.3037	681.277	3.3037_681.2766	0	0	0	0	0	0	2.4028	0	0.3175	0	0	0	0	0	0	0	0	0	0	0	0	0	0	0	0	5.3559	0	0	0	5.0135	0	0	0	0	0	0	0	0	0	0
Negative	6.6687	681.421	6.6687_681.421	0.2082	0	0	0	0	0	0	0	0	0	0	0	0	0	0	5.8495	2.3759	3.2346	2.5741	1.6323	0	0	0	0.1529	0	0	0.3086	0.7464	0	0.1731	0.2738	0	0	0	0	0.2286	0.2218	0.1487	0	1.077
Negative	0.4872	683.205	0.4872_683.2049	0	1.7373	1.8558	1.2994	1.2539	2.0321	0.7366	0	5.012	1.2544	6.2314	0	7.0651	7.9038	0.7126	0.1522	1.1643	1.1194	1.8598	0	3.7267	2.4506	8.3999	1.1563	3.2031	0	0	1.7248	2.2211	0	5.0057	11.5252	9.169	11.6396	14.2496	9.1912	8.0381	0	0	0
Negative	2.942	683.219	2.942_683.2187	0	0	0	0	0	1.4087	0.5148	0.556	1.7544	1.7984	0	0	0	0	0	0	0	0	0	0	0	0	0	0	0	0	0	0	0	0	0	0	0	0	0	0	0	0	0	0
Negative	0.6168	683.222	0.6168_683.2225	0	0	0	0	0	1.3542	0.5115	0.4704	1.4856	1.1453	0	0	0	0	0	0	0	0.8928	0.5823	2.4815	0	0	0	0	0	0	0	0.8313	0.6549	0.39	0.3929	0	0	0	0	5.0131	0	2.433	0	3.8969
Negative	0.5013	683.223	0.5013_683.2235	1.0427	1.7373	1.8558	0.4328	1.2539	2.0321	0.7366	0	5.012	1.2544	6.2314	2.5606	7.0651	7.9038	0.7126	0.1522	1.1643	1.1194	1.8598	3.1548	1.3986	2.4506	8.3999	1.3078	3.2031	0.3181	0	1.7248	2.2211	0.4645	5.0057	11.5252	22.7823	11.6396	14.2496	9.1912	8.0381	0	0	4.7048
Negative	0.5048	683.273	0.5048_683.2725	0	0	0	0	0	0	0	0.3028	0	0	0	0	0	0	0	0	0	0	0	0	0	0	0	0	0	0	1.8002	0	0	0	0	0	0	0	0	0	0	0	3.563	0
Negative	2.5436	685.236	2.5436_685.2362	1.3242	1.8258	0.8462	1.3561	0.9954	0	0	0	0	0	0	0.6693	0	0.6599	0.6264	0	0	0	0	0	0.7024	0.831	0.615	0	1.8582	0	0	0	0	0	3.9077	4.6404	4.1459	4.1409	6.7941	0	0	0	0	0
Negative	3.88	687.189	3.88_687.1895	0	0	0	0	0	2.1597	2.0912	2.4934	4.8865	2.59	0	0	0	0	0	0	2.4745	1.2134	2.866	1.5905	0	0	0	0	0	0.9373	0.9741	0	0.8609	1.1918	0	0	0	0	0	0	1.0792	2.6623	1.9957	1.1752
Negative	4.6211	687.191	4.6211_687.1905	0	0	0	0	0	0	0	0	0	0	0	0	0	0	0	0	0	0	0	0	0	0	0	0	0	0	9.7761	0	0	10.742	0	0	0	0	0	0	0	0	3.2251	0
Negative	1.7764	687.192	1.7764_687.1916	2.8263	0	0	0	0	5.1484	2.6475	3.1025	4.0364	2.1255	0	0	3.1511	0	0	0.7618	2.4485	1.9329	1.7239	1.0325	0	0	0	0	0	1.354	2.8235	1.4436	1.4946	1.1302	0	0	0	0	0	2.3318	0.956	1.435	0.9284	1.32
Negative	0.5724	194.925	0.5724_194.9254	0	0	0	0	2.6564	0	0	0	0	0	0	9.5847	0.7382	0	2.8894	0	0	0	0	0	0	0	0	0	0	0	0	0	0	0	0	4.7691	7.5487	0.9393	0	0	0	0	0	0
Negative	0.6559	194.928	0.6559_194.9284	0	0	0.7481	0	1.306	0.4257	2.6142	1.4782	1.598	0.8891	0	2.3738	0	0	0	1.8572	1.7049	0.8487	3.0847	2.6335	0	0	0	0	0	0.9383	2.466	1.9027	3.259	1.0635	0.7817	1.5821	3.7811	2.0484	0.5558	3.7223	3.5609	2.5368	1.3811	2.0545
Negative	0.5	195.049	0.5_195.0488	72.4887	63.0235	65.6267	60.3123	80.9792	30.5183	37.7376	35.9785	53.8898	29.2174	104.121	90.8945	107.766	114.975	89.9193	28.8976	38.6271	41.6845	37.3384	40.0423	111.946	86.238	98.8723	88.9635	96.6557	20.3873	25.2455	37.7337	45.757	25.6301	91.5682	115.023	144.882	108.438	198.847	73.8577	63.1945	31.9698	25.4509	37.6126
Negative	0.8446	195.052	0.8446_195.0517	0	0	0	0	0	0	0	0	0	0	0	0	0	0	0	0	0	0.4446	0	0	0	0.6834	0	0	0	0	0.6879	1.6711	1.4638	1.58	0	0	0	0	0	0	0	0	0	0
Negative	0.5993	195.052	0.5993_195.0523	0	0	0	0	0.9328	30.5183	37.7376	35.9785	0	29.211	0	0	0	0	0	28.8976	0	41.6845	37.3384	40.0423	0	2.9789	0	0	1.9739	17.1229	32.8066	0	0	25.6301	0	0	0	0	0	0	0	31.9698	44.205	37.6126
Negative	2.0409	195.055	2.0409_195.0554	3.9188	4.529	6.5424	4.5281	2.947	0	0	0	0	0	0	0	0	0	0	0	0	0	0	0	8.2383	7.3072	6.4874	7.4334	10.6201	0	0	0	0	0	3.6037	2.636	0	4.9346	1.7748	0	0	0	0	0
Negative	0.488	195.062	0.488_195.0622	72.4937	63.0235	65.6267	60.3123	80.9768	13.3518	26.8409	21.6167	34.97	13.1334	104.121	90.8945	107.781	114.975	89.9283	17.1976	26.663	23.9981	20.9275	20.3188	111.949	86.2409	98.8588	88.9605	96.6618	20.401	25.2784	27.2115	38.83	20.7943	91.5682	115.023	144.882	108.438	198.843	73.8577	51.9484	0	25.454	17.7668
Negative	4.0584	195.101	4.0584_195.1012	0	0	0	0	0	0	0.8723	0	0.7685	0	0	0	0	0	0	3.7828	0	0	0	0.5518	0	0	0	0	0	2.2347	0	0	0	0	0	0	0	0	0	0	0	0	0	0
Negative	0.5337	195.81	0.5337_195.8098	19.2355	21.6689	26.1079	17.6472	19.8829	0	0	0	0	0	23.4872	17.3317	28.4903	27.6895	22.74	0	0	0	0	0	27.6212	20.3163	29.1501	27.1405	26.7617	0	0	0	0	0	23.1704	20.2062	26.364	37.0716	32.9143	0	0	0	0	0
Negative	5.8542	195.81	5.8542_195.8098	0	1.4389	2.0177	0	0	2.2425	2.0784	0.2821	0	0	0	0	0	0	0	0	0	0.5209	0	0	0	0	1.8226	2.1875	0	0	0	0	0	0	1.8223	0	0	0	0	0	1.5018	1.7652	0	0
Negative	6.1051	195.81	6.1051_195.81	0.4964	0	0	0	0	0	0	0.5173	0	1.3873	0	0	0	0	0	0.2224	0	0	0	0	0	0	0	0	0	0	0	0	0	0	0	0	0	0	0	2.663	0.9759	0	0	0
Negative	8.3584	195.81	8.3584_195.8101	0.9586	0.5595	0	0.9545	0.3185	2.7828	2.5828	2.0973	1.0213	0	0	0.6782	0.558	0	0	4.2756	1.9767	0.8926	2.1449	1.0572	0	0	0	0.886	0	1.393	0.9787	1.6662	0	1.759	0	0	0	0	1.3952	1.5678	1.5933	2.3617	0	1.7787
Negative	8.6136	195.81	8.6136_195.8101	0	0.8891	1.3535	1.1216	1.085	1.1947	1.9251	0	2.8232	0	1.7386	1.031	1.6226	1.4787	1.0165	0	2.9737	0	0	0	0	0	0	1.6604	0	0	2.7878	1.0459	1.0948	0	1.3921	0	0	0	0	2.156	0.5386	1.5906	2.2426	0
Negative	8.4858	195.811	8.4858_195.8106	0	0.556	0	0.2327	0	3.3751	0	0	2.9499	0	0	0	0	0	0	3.7343	4.4055	1.9595	2.5473	1.468	0	0.4316	0	0	0	3.0962	2.844	2.0258	1.6313	2.1849	0	0	0	0	0.8377	2.1755	2.5208	2.9307	3.2992	1.8115
Negative	7.0305	195.811	7.0305_195.8107	0	0	0	0	0	1.6043	0	0	0	0	0	0	0	0	0	1.9235	0	0.5981	0.7083	0	0	0	0	0	0	0	0.5817	0	0	0	0	0	0	0	0	0	0.0362	0	0	0
Negative	7.8908	195.811	7.8908_195.8108	0	0	0	0	0	0	0	0	0	1.5412	0	0	0.5753	0	0	0	2.6293	0	0	0	0	0	0	0	0	0	0	0	0	0	0	0	0	0	0	3.5755	0	1.9697	0	0
Negative	4.1219	687.192	4.1219_687.1921	25.4085	15.0815	29.5908	32.1535	19.6075	15.7405	13.0872	14.3099	24.381	17.5518	33.1953	18.0255	23.5873	38.2169	15.2556	7.0546	9.3689	7.6591	10.3841	8.0066	29.912	18.0461	18.2002	22.6373	17.6735	5.2605	8.2257	0	0	3.2373	28.1723	19.8544	11.47	26.0659	15.2017	6.5323	9.2054	14.661	9.1015	11.8138
Negative	4.2979	687.192	4.2979_687.1925	16.7871	10.7704	0	21.7748	0	9.8454	7.8028	6.901	13.3907	10.7392	0	9.4524	0	24.8617	10.3596	3.9705	0	4.9926	5.8085	5.104	0	0	0	0	0	0	6.3448	3.8871	5.4869	8.6121	0	0	0	0	0	4.5457	6.3897	12.1861	5.3645	7.8467
Negative	4.785	687.193	4.785_687.1927	0	0	0	0	0	0	0	0	2.9532	0	0	0	0	0	0	0	0	0	0	0	0	0	0	0	0	3.1159	4.0378	0	0	5.9083	0	0	0	0	0	3.0166	0	2.4063	5.8773	0
Negative	4.8742	687.193	4.8742_687.1934	10.4568	7.8301	7.6424	9.1971	11.0254	7.3202	8.4628	10.2932	8.1302	6.8408	8.1082	10.2709	4.4697	9.0893	10.9435	5.721	13.0324	7.8983	9.1427	4.6035	19.4769	19.9735	11.414	14.3094	19.2512	8.6263	9.4414	0	7.9555	13.354	0	10.3228	8.0566	11.1048	9.813	9.9431	12.6656	18.4451	17.1871	13.6685
Negative	3.9802	687.194	3.9802_687.1942	0	0	0	0	0	4.5101	2.4891	2.7981	4.874	4.0817	0	0	0	0	0	2.1142	3.3522	1.9415	3.6671	2.4823	0	0	0	0	0	1.6056	2.6462	0	0	1.4696	0	0	0	0	0	0	0	2.0023	2.1728	3.0669
Negative	5.7496	687.356	5.7496_687.3561	0	0	0	0	0	0	0	0	0	0	0	0	0	0	0	0	0	0	1.9784	2.1775	0	0	0	0	0	0	0	0	0	0	0	0	0	0	0	0	0	0	0	0
Negative	5.03	687.359	5.03_687.3592	0	0.8715	0	0	0.7771	1.5149	0	0	1.4366	1.9215	4.6664	0	3.0019	2.2924	2.5499	0	4.918	4.8527	0	0	1.7171	1.9827	0	0.8541	1.1395	0	0	0	0	0.5427	0	0	0	0	0	0.7883	0.5623	0	0	0
Negative	8.742	687.36	8.742_687.36	0	0.7026	0.9518	4.1415	1.0835	4.5147	1.1244	8.2527	7.0076	1.3294	0	0.8941	0.7451	0.5838	1.678	0.5681	6.6861	10.0864	12.5466	14.1044	0.4887	0.512	0	0.207	0.5337	0.1721	0.8262	0.3132	0	0.2573	0.5542	0	0.5044	0	0.8238	8.3509	11.7697	1.3822	6.8641	23.6752
Negative	5.8438	689.248	5.8438_689.2477	0.4481	0	0	0	0	2.6476	0	1.8469	2.2748	2.5019	0	0	0	0	0	2.7677	2.3141	3.0964	0	3.2041	0	0	0	0	0	0	4.1322	4.4679	4.6877	0	0	0	0	0	0	2.398	2.4809	3.8273	4.4796	4.6885
Negative	5.4358	689.25	5.4358_689.2496	0	0	0	0	0	2.1007	2.7586	2.0514	0	1.6295	0	0	0	0	0	0	0	0	0	0	0	0	0	0	0	0	0	0	0	3.5702	0	0	0	0	0	0	0	0	0	0
Negative	3.0641	689.255	3.0641_689.2553	0	0	0	0	0	0	0	0	0	0	0	0	0	0	0	0	0	0	0	0	0	0	0	0	0.2702	3.3314	0	0	0	5.623	0	0	0	0	0	0	0	0.1988	0	0
Negative	2.4313	689.282	2.4313_689.2824	0	0	0	0	0	0	0	0	0	0	0.2207	0	0	0	0	0	0	0	0	0	0	0.1631	0	0	0	2.3856	0	0.4514	0.6063	2.5832	0	0	0	0	0	0.4293	0.3315	0.8774	0	2.3245
Negative	6.9267	689.337	6.9267_689.3365	0	0	0	0	0	1.8814	1.3438	1.0085	0.671	0.4926	0	0	0	0	0	0	1.6122	1.8985	5.0871	6.4506	0	0	0	0	0	2.0224	3.0747	3.4712	0.7346	1.5786	0	0	0	0	0	0.8363	1.0485	2.5695	2.1941	0.8486
Negative	8.311	689.376	8.311_689.3763	0	0	0.6214	0	0	0	0	0	1.8663	0	0	0	0	0	0	0	1.3879	1.0909	0.8324	1.1051	0	0	0	0	0.5184	0	0	0	0	0	0	0	0	0.6037	0	1.4299	1.0296	0.6109	2.239	4.838
Negative	2.192	691.067	2.192_691.0667	0	0	0	0	0	0.4909	0.1598	0	0	0	0	0	0	0	0	2.0264	0.2322	2.0308	2.1974	4.6976	0	0	0	0	0	0.8373	0.3355	0.1495	0	0	0	0	0	0	0	0	0	0.7178	0	0
Negative	3.4731	691.194	3.4731_691.1937	1.6848	1.4652	1.9372	0	1.3841	0	0	0	0	0	0.7977	0	1.067	0	0	0	0	0	0	0	0	0	0	0	0	0	0	0	0	0	6.1218	4.4453	6.1611	3.004	1.3653	0	0	0	0	0
Negative	2.7704	195.811	2.7704_195.811	0	0	0	0	0	1.8958	2.3148	0.6868	0	0	0	0	0	0	0	0	0.9106	0	0	0	0	0	0	0	0	0	0	0	0	0	0	0	0	0	0	0	0	0	0	0
Negative	8.1272	195.812	8.1272_195.8118	0	0	0	0	0	0	0	0	0	0	0	0	0	0	0	0	0	2.1988	1.706	0	0	0.4937	0	0	0	0	0	0	0	0	0	0	0	0	0	3.597	2.1558	0	0	0
Negative	8.2584	195.812	8.2584_195.8119	0	0	0	0	0	1.8051	2.3168	0	2.0656	0	0	0	0	0	0	0	0	0	0	0	0	0	0	0.5236	0	0	0	0	0	1.4619	0	0	0	0	0	0	0	0	0	1.432
Negative	0.6441	195.814	0.6441_195.8144	0	0	0	0	0	7.0591	6.819	8.3469	9.4627	6.9383	0	0	0	0	1.894	0	4.3572	4.4076	7.797	7.5612	0	0	0	0	0	2.9762	8.0794	5.9576	9.2781	5.825	0	0	0	0	0	0	7.0503	5.9234	5.0121	4.1456
Negative	0.4522	196.946	0.4522_196.9459	1.962	1.4822	2.0817	1.7939	1.9997	0	0	0	0	0	2.6007	2.105	2.9662	2.0941	2.7378	0	0	0	0	0	4.8866	5.9526	3.7066	5.0953	6.0449	0	0	0	0	0	4.2783	6.3135	7.7356	6.2888	7.0113	0	0	0	0	0
Negative	1.4116	197.044	1.4116_197.0441	13.9584	9.5947	17.0515	20.3797	12.855	2.3912	3.8433	3.6114	1.8989	1.7144	8.2225	10.3332	10.2498	9.8449	5.3239	0	1.8515	2.1277	1.2391	1.2565	14.4336	10.1746	21.1563	17.0465	10.1078	3.0924	0	1.7552	0	2.1094	12.7563	7.9327	7.3228	12.3222	9.3355	2.8289	3.7444	5.2327	4.4094	1.9802
Negative	4.9544	197.806	4.9544_197.8062	0	0	0	0	0	1.8594	1.1384	0.6032	0	0.3059	0	0	0	0	0	0.2676	0.7974	0	0	0	0	0	0	0	0	0	0	0	0	0	0	0	0	0	0	0	2.2231	0	0	0.4183
Negative	7.8416	197.806	7.8416_197.8063	0	0	0	0	0	0	0	0	0	0	0	0	0	0	0.5436	0	0	0	0	0	0	0	0	0	0	0	0	0	0	1.7054	0	0	0	0	0	4.4672	0	0	2.1584	0
Negative	0.5328	197.807	0.5328_197.8073	23.2709	27.4517	33.8245	22.298	24.6951	0	0	0	0	0	30.097	21.8045	31.7041	33.2438	27.3742	0	0	0	0	0	32.0299	24.4638	34.2931	34.678	33.0191	0	0	0	0	0	28.3368	23.4866	33.2762	43.3867	38.8793	0	0	0	0	0
Negative	8.3817	197.807	8.3817_197.8074	0	0.7072	0	0	0	2.7626	3.0581	3.7296	0	0	0	0	0	0	0	0	3.8954	3.4577	3.0874	1.3643	0.6602	0	0	0	0	0	1.538	1.9151	1.3464	1.4561	0	0	0.9468	0	1.2666	1.7456	0.6863	2.5945	0	1.7267
Negative	8.4799	197.808	8.4799_197.8075	0	0	0	0	0	3.9991	4.1156	0	2.4855	0	0	0	0	0	0	3.8199	3.4441	1.8175	3.1872	1.9452	0	0	0	0.2219	0	2.1446	3.8619	2.4355	2.7383	2.2353	0	0	0	0	0	2.7848	3.0474	3.1095	3.4114	2.049
Negative	5.8584	197.808	5.8584_197.8075	0	1.9752	0	2.3481	0	1.6776	2.3297	0.6875	1.3095	1.196	0	0	1.3528	0	0	0	1.2536	0.727	0	0	0	1.9081	0	2.4025	0	0	1.3459	0	0.8023	0	0	2.304	0	0	3.4618	3.0943	1.6012	0	0	0
Negative	8.6505	197.808	8.6505_197.8077	1.7057	0	0	1.2895	1.7845	0.8299	1.9198	0	2.0288	0.1983	2.4269	1.0074	0	2.0982	0	0	2.6082	0	0	0	1.6059	1.1902	1.7225	1.5107	1.6342	1.6154	1.7876	0.9743	1.6608	1.1548	0	1.4097	1.3496	2.2077	2.1402	2.2343	1.755	1.6761	2.2234	0
Negative	8.1119	197.808	8.1119_197.808	0	0	0	0	0	0	3.0572	2.8657	0	1.7851	0	0	0	0	0.5117	0	2.7063	2.1785	0	0	0	0	0	0	0	0	0	0	0	1.8606	0	0	0.5494	0	0	3.5689	0	2.1519	0	0
Negative	2.7606	197.808	2.7606_197.8081	0	0	0	0	0	2.3143	2.9262	2.1845	0.7766	0	0	0	0	0	0	0	1.1021	0	0	0	0	0	0	0	0	0	0	0	0	0	0	0	0	0	0	2.9853	0	0	0	0
Negative	6.9153	197.808	6.9153_197.8084	0	2.1923	0	1.7919	2.0852	0	0	0	0	0	0	1.4276	0	0	1.8713	0	0	0	0	0	0	2.3809	0	0	0	0	0	0	0	0	0	2.658	0	0	3.7845	0	1.8061	0	0	0
Negative	3.0669	691.248	3.0669_691.2482	0	0	0	0	0	0	0	0	1.1753	0	0	0	0	0	0	7.0636	2.314	1.625	3.7474	1.2312	0	0	0	0	0	0	0	0.3597	0	0	0	0	0	0	0	0	0	0	0	0
Negative	5.6839	691.264	5.6839_691.2638	0	0	0	0	0	3.3962	0	0	2.447	1.7545	0	0	1.119	0	0	0	2.282	3.9009	2.2557	2.4217	0	0	0	0	0	4.2981	4.3997	5.0877	6.3716	2.9675	0	0	1.6449	0	0	0	2.9133	3.541	5.2029	5.2052
Negative	6.5711	691.266	6.5711_691.2658	0	0	0	0	0	0.6679	1.0881	0.4598	0.4881	0.7328	0	0	0	0	0	0.8643	0	0	0	0	0	0	0	0	0	0.7359	2.0319	5.7377	4.5082	1.3835	0	0	0	0	0	0	0	0	0	0
Negative	2.9607	691.27	2.9607_691.2699	0	0	0	0	0	0	0	0	0	0	0	0	0	0	0	0	0	0	0	0	0	0	0	0	0	7.6891	0	0	0	10.7962	0.3636	0	0	0	0	0	0	0	0	0
Negative	3.2029	691.27	3.2029_691.2703	0	0	0	0	0	0	0	0	0	0	0	0	0	0	0	0	0	0	0	0	0	0	0	0	0	5.5772	0.947	0	0.3885	9.9197	0	0	0	0	0	0	0	0	0	0
Negative	2.4411	691.298	2.4411_691.2983	0	0	0	0	0	0.8637	0	0	0	2.331	0	0	0	0	0	1.7401	2.0572	1.0063	1.2608	0.8447	0	0	0	0	0	0	0	0	0	0	0	0	0	0	0	0	1.3948	0	1.5662	2.5641
Negative	2.3337	691.299	2.3337_691.2995	0	0	0	0	0	0	2.364	3.0179	0	1.7413	0	0	0	0	0	0	0	0	1.1392	0	0	0	0	0	0	0	0	0	0	0	0.3398	0	0	0	0	0	0	0	0	2.5519
Negative	6.7764	691.354	6.7764_691.3537	0	0	0	0	0	15.6348	7.7445	5.8837	3.143	2.9237	0	0	0	0	0	9.86	6.0342	7.0981	26.6222	27.4274	0	0	0	0	0	7.7212	10.3548	22.6797	5.1755	8.7294	0	0	0	0	0	2.8655	4.6548	13.3844	10.6754	2.6306
Negative	6.6492	691.386	6.6492_691.3865	0	0	0	0	0	0	0	0	0	0	0	0	0	0	0	2.1255	0	2.9293	2.0388	2.0447	0	0	0	0	0	0	0	0.3498	0	0	0	0	0	0	0	0	0	0	0	0
Negative	5.7276	691.392	5.7276_691.3918	0	0	0	0	0	0.6049	0	0	0	0	0	0	0	0	0	1.5222	0.7342	1.7442	1.7827	1.4953	0	0	0	0	0	0	0	0	0	0	0	0	0	0	0	0	0	0	0	0
Negative	4.6305	691.406	4.6305_691.4062	0	0	0	0	0	0.3343	0.3586	0.4129	0	0	0	0	0	0	4.446	3.2579	3.2653	4.3922	2.5462	2.532	0	0	0.462	0	0	0.1857	0.4494	0.4334	0.267	0.5874	0	0	0.2321	0	0	0.1264	0	0	0.1532	0.6678
Negative	3.8092	693.276	3.8092_693.2761	0	0	0	0	0	0	4.2136	1.3874	0	0	0	2.8008	0	0	0	0	0	0	0	0	0	0	0	0	0	32.7223	0	0	0	20.0494	0	0	0	0	0	9.3899	22.3164	0	7.4155	0
Negative	3.9257	693.277	3.9257_693.2772	0	0	0	0	0	0	0	0	0	0	0	0	0	0	0	0	0	0	0	0	0	0	0	0	0	3.176	0	0	0	2.2292	0	0	0	0	0	1.6717	3.7797	0	0	0
Negative	4.024	693.278	4.024_693.2775	0	0	0	0	0	0	0	0	0	0	0	0	0	0	0	0	0	0	0	0	0	0	0	0	0	2.9977	0	0	0	2.3568	0	0	0	0	0	1.5533	2.86	0	0	0
Negative	3.5009	693.278	3.5009_693.278	0	0	0	0	0	0	0	1.3944	0	0	0	0	0	0	3.1009	7.0138	0	4.8591	0	0	0	0	0	0	0	9.5577	0	0	0	0	0	0	0	0	0	0	0	0	0.391	0
Negative	5.5209	693.278	5.5209_693.2783	0	0	0	0	0	0.8444	0.5017	0.4749	0.9162	0.6136	0	0	0	0	0	1.0281	0.6331	0.9615	0.6262	0.6627	0	0	0	0	0	0	2.4661	3.2523	3.0485	1.1938	0	0	0	0	0	0	1.577	1.7542	2.9586	3.6779
Negative	7.6312	197.809	7.6312_197.8092	0	0	0	0	0	0	0	0	0	0	0	0	1.0164	0	0	0	0	0	0	0.6829	0	0	3.4868	0	0	0	0	0	1.7904	0	0	0	0	0	0	0	2.2625	0	0	0
Negative	2.6583	197.809	2.6583_197.8093	0	0	0	0	0	0	0.6494	0.4216	0	0	0	0	0	0	0	0	0	0	0	0	0	0	0	0	0	1.5451	0	0	0	0	0	0	0	0	0	2.9429	0	0	0	0
Negative	8.2542	197.81	8.2542_197.8096	0	0	0	0	0	0	2.9073	0	1.2724	0	0	2.5946	0	0	0	0	0	0	0	0.8991	0	0	0	0	0	0	0	0	0	0	0	0	0	0	0	4.5975	0	0	0	2.0546
Negative	0.6444	197.812	0.6444_197.8122	0	0	0	0	0	8.1895	9.4321	10.13	11.5953	9.0823	0	0	0	0	2.4634	0	5.5549	5.2616	8.9978	9.1013	0	0	0	0	0	3.8353	10.8727	8.1057	12.3855	7.1711	0	0	0	0	0	0	8.404	6.6632	6.1718	5.324
Negative	0.5363	199.805	0.5363_199.8053	11.986	13.149	3.5826	9.3733	12.0868	3.6341	5.1645	0	5.856	0	13.1437	11.2315	16.8151	16.4497	15.0167	0	0	0	4.629	0	15.8021	12.1351	18.9208	18.2486	14.9268	0	5.5361	3.7018	4.3899	0	13.4883	12.8067	15.9905	21.8529	18.1479	0	4.3714	0	2.3037	0
Negative	0.6143	199.809	0.6143_199.8093	0	0	0	0	0	3.7363	5.1645	5.407	5.856	3.7383	0	0	0	0	0	1.2672	2.7251	2.6014	4.8318	4.865	0	0	0	0	0	1.8207	5.5361	3.7018	4.3899	3.5776	0	0	0	0	0	0	4.3714	2.7643	2.3037	2.5954
Negative	2.2426	201.039	2.2426_201.039	0	0	0	0	0	0.241	0	1.9882	0	0	0	0	0	0	0	0	0	0	1.5381	2.1511	0	0	0	0	0	0	0.6017	0	0	0	0	0	0	0	0	0.8753	1.1703	0	0.0982	2.4773
Negative	4.6537	201.114	4.6537_201.1136	0	0	0	0	0	0	0	0	0	0	0	0	0	0	0	3.3711	1.0401	1.9281	0.7831	0.322	0	0	0	0	0	0	0	0.2506	0	0	0	0	0	0	0	0	0.42	0.6602	0	0
Negative	0.5332	201.803	0.5332_201.8033	3.2236	2.9949	4.3483	2.7359	3.2357	0	0	0	0	0	3.0173	2.5339	3.4	4.1506	2.8571	0	0	0	0	0	4.0329	2.9895	4.1205	3.6806	3.9236	0	0	0	0	0	3.132	2.8246	3.7146	4.8392	4.5052	0	0	0	0	0
Negative	0.6978	203.019	0.6978_203.0195	4.3289	8.0814	11.7205	4.2286	4.406	3.5465	4.4503	5.7579	6.1692	3.3203	3.9138	3.0453	5.5087	4.5414	5.2623	2.9566	2.1977	3.216	2.4937	4.336	2.6512	3.9183	4.0856	0	0	1.8537	3.1358	2.3661	4.6241	2.4853	2.8213	0	6.7365	4.3712	2.9884	1.7725	3.7628	4.8343	2.7738	3.7967
Negative	0.5341	203.02	0.5341_203.0197	8.5287	9.6847	13.2272	8.9065	10.1633	0	1.9617	0	0	0	5.8867	5.0591	7.954	7.5372	8.0732	1.6114	0.0976	0	0.2861	1.506	3.94	5.1519	6.6797	6.2714	3.8309	0.2942	0	0	0	0	5.8268	6.6826	9.2089	8.3427	5.6971	0	2.5767	0	0	0.2895
Negative	1.4784	203.079	1.4784_203.0795	0	0	0	0	0	1.2579	9.0646	0	0	0.8725	0	0	0	0	0	2.1662	1.1691	0	0	0	0	0	0	0	0	0	0	0.4102	0	5.0115	0	0	0	0	0	0	1.8479	0	2.5299	1.0147
Negative	1.6077	203.081	1.6077_203.0805	11.8195	0	3.164	11.6826	8.0099	4.7871	43.7843	26.3431	2.762	3.0336	0	57.3212	0	0	10.0108	11.8928	5.646	3.6169	4.0484	0	10.8268	3.1793	8.0742	8.4317	9.273	43.4998	1.388	1.4522	0.6362	29.5316	4.1363	3.7484	2.9316	6.2795	0	12.9998	9.1824	1.1512	16.028	6.3407
Negative	1.3911	203.081	1.3911_203.081	0	0	0	0	0	1.0615	9.0607	5.7123	0.5686	1.0401	0	0	0	0	0	2.1662	1.5325	1.1848	0.9638	0	0	0	0	0	0	9.7937	0	0.4483	0	8.8263	0	0	0	0	0	3.258	2.5262	0	3.7597	1.0417
Negative	3.0174	203.081	3.0174_203.0812	0	0	0	0	0	0	0	0	0	0	0	0	0	0	0	0	0	0	0	0	0	0	0	0	0	10.2406	0	0	0	8.9365	0	0	0	0	0	0	1.5932	0	0	0
Negative	3.1441	203.082	3.1441_203.0818	0	0	0	0	0	0	0	0	0	0	0	0	0	0	0	0	0	0	0	0	0	0	0	0	0	21.3474	0	0	0	18.5289	0	0	0	0	0	0.8722	4.6126	0	0.7258	0.6407
Negative	3.7236	693.279	3.7236_693.2795	0	0	0	0	0	0	0	0	0	0	0	0	0	0	0	0	0	0	0	0	0	0	0	0	0	11.9408	0	0	0	6.2041	0	0	0	0	0	9.3899	0	0	3.4966	0
Negative	3.041	695.278	3.041_695.2777	7.9268	9.7877	5.0094	7.7042	6.1659	5.2931	5.8458	7.4905	6.8404	5.8599	12.5321	5.8083	6.3173	10.3872	12.0897	0	8.8903	11.1738	6.4583	6.191	10.1993	16.2669	10.1895	12.8928	14.9184	7.9543	9.5529	6.4736	9.8153	14.5094	6.6296	5.049	6.7487	6.086	5.5131	7.3797	0	10.1208	8.1107	9.0047
Negative	3.3364	695.279	3.3364_695.2788	0	0	0	0	0	0	0	0	0	0	4.7732	0	0	0	0	0	4.9793	6.0173	3.2813	3.0509	0	5.7937	0	0	0	5.0124	0	0	0	0	0	0	0	0	0	0	0	0	0	0
Negative	3.7281	695.29	3.7281_695.2896	0	0	0	0	0	0	5.031	0	0	0	0	0	0	0	0	0	0	0	0	0	0	0	0	0	0	11.8743	0	0	0	9.1121	0	0	0	0	0	0	0	0	0	0
Negative	3.5943	695.292	3.5943_695.2922	0	0	0	0	0	0	1.9704	0	0	0	0	0	0	0	0	0	0	0	0	0	0	0	0	0	0	4.1071	0	0	0	4.2219	0	0	0	0	0	0	0	0	0	0
Negative	4.2771	695.401	4.2771_695.4007	0	0	0.1243	0	0	0.1784	0	0	0.1456	0.1727	0	0	0	0	0	1.6397	1.4791	2.1122	2.4919	2.9388	0	0	0	0	0	0	0.3818	0.3347	0.16	0	0	0	0	0	0	0	0	0	0	0.3462
Negative	6.2285	695.401	6.2285_695.4009	0	0	0	0	0	0.1697	0.4202	0.3034	0.2001	0.2264	0	0	0	0	0	2.5731	3.0709	4.6581	2.6392	4.5966	0	0	0	0	0	0	0	0	0	0.4928	0	0	0	0	0	0	0.5492	0.2444	0.1601	1.733
Negative	4.6012	697.197	4.6012_697.1974	10.1128	6.8339	13.7877	16.1039	6.0344	10.018	10.6188	10.9477	11.6048	14.8455	6.7336	0.6037	5.966	10.7167	0	4.7618	3.9005	4.4881	3.4291	5.3611	0	0	0	0	0	0	0	0	0	0	0	0	0	0	0	0	0.3049	2.3675	0.3111	0.211
Negative	7.1998	699.17	7.1998_699.1699	0.6359	0	0	0.8112	2.623	6.3548	5.2488	5.4573	6.1379	4.7491	0	0	0	0	2.5838	5.2239	5.9231	4.182	5.9398	5.5055	0	0	0	0	0	7.0389	6.1343	4.632	3.262	4.5481	0	0	0	0	0	3.4308	6.0104	10.0923	8.3835	14.8204
Negative	7.094	699.176	7.094_699.1758	0	0	0	0	0	0	0	0	0	0	0	0	0	0	0	0	0	0	2.2162	0	0	0	0	0	0	0	1.7677	0	0	0	0	0	0	0	0	0	0	1.9722	1.4806	2.6064
Negative	2.822	699.183	2.822_699.1825	0	0	3.4889	4.1695	0	0	0	0	1.7639	2.1698	3.5008	4.148	0	0	0	0	0	0	0	2.0833	0	0	0	0	0	0	0	0	0	0	3.0651	2.8168	0	0	0	0	0	2.9915	0	0
Negative	2.3113	699.217	2.3113_699.2168	1.6924	0.9668	1.3093	1.4295	1.6543	1.9507	0	0	1.8857	1.2025	4.394	0.7586	6.5949	1.245	0	0	0	0	0	0	2.8878	3.7526	2.8386	4.9795	2.6294	0	0.8765	0	0	0	0	0.5418	0	0	0	0	0	0	0	0
Negative	0.4866	699.221	0.4866_699.2211	0.1746	0	0.1333	0	0.2226	0	0	0	0	0	0	0.4444	2.0157	0	0.3969	0	0	0	0	0	0	1.9487	2.7952	2.0833	0	0	0	0	0	0	3.3414	2.1657	3.0878	2.0619	3.1042	0.6771	0	0	0	0
Negative	6.2286	699.325	6.2286_699.3248	0	0	0	0	0	0	0	0	0	0	0	0	0	0	0	0.195	0	0	0	0	0	0	0	0	0	1.0136	1.5878	1.9691	1.6068	2.325	0	0	0	0	0	0.2445	0	0.1522	0.5742	1.8003
Negative	0.5021	701.164	0.5021_701.1639	0	2.1193	3.5854	3.5822	2.9584	1.6495	0.3472	0	0	2.602	5.2411	0	9.7233	9.8597	1.0994	0	0.2205	0.4937	0.3232	0.8099	8.0119	1.9601	0	0	1.2691	0.1241	0	0.6973	0	0.2313	10.6738	0	3.1267	7.9728	3.7799	2.5883	6.3537	2.5342	0	5.5651
Negative	0.5008	701.19	0.5008_701.19	1.7305	2.1193	3.5854	3.1703	3.2856	1.6495	0.3633	0.4952	0	2.602	5.2411	2.7585	9.7233	9.8597	1.429	0	0.5123	0.4937	0.3232	0.8099	0	3.2988	9.54	11.8895	1.2691	0.1241	0	0.6973	0.5844	0.2313	10.6738	6.0294	3.1267	7.9728	3.7799	10.1949	6.3537	2.5342	0	5.5651
Negative	3.2151	203.082	3.2151_203.0819	0	0	0	0	0	0	0	0	0	0	0	0	0	0	0	0	0	0	0	0	0	0	0	0	0	20.7965	0	0	0	14.3054	0	0	0	0	0	1.5575	5.8989	0	0.9905	0.86
Negative	4.163	203.13	4.163_203.1302	0	0	1.8021	0	1.1314	1.229	0.7267	0	0.6484	1.2131	4.049	0	0	3.6453	0	1.9716	0.8058	0.7351	0.9623	0.5447	0	0	0	0	0	0	0	0	0	0	0	0	0	0	0	0	0	0	0	0
Negative	0.9812	205.035	0.9812_205.0353	0	0	0	0	0	0.4429	0	0	0.4975	0.5247	0	0	0	0	0	0	0	0	1.1205	2.8811	0	0	0	0	0	0.6497	4.3744	1.0319	1.595	2.2397	0	0	0	0	0	0	1.1979	0	0	0
Negative	4.3461	205.123	4.3461_205.1226	2.945	2.3697	2.7549	2.919	2.5863	0	0	0	0	1.3716	1.3201	2.7214	1.4771	1.6889	1.7255	0	0	0	0	0	0	0	0	0.6893	1.5346	0	0	0	0	0	0	0	0	0	0	0	0	0.5309	0	0
Negative	3.6459	205.123	3.6459_205.123	0	0	0	0	0	0	0.6616	0.5178	0.6865	0	0	0	0	0	0	1.7657	1.4963	1.8689	1.3058	1.2681	0	0	0	0	0	2.0339	1.5069	1.8271	0	0	0	0	0	0	0	0	0.8107	1.6971	1.2899	1.6509
Negative	2.8999	206.081	2.8999_206.0808	0	0	0	0	0	1.2028	2.8531	2.6656	0.8713	1.2579	0	2.8064	0	0	0	13.801	4.3783	3.5955	3.1621	1.757	0	0	0	0	0	33.639	0.9333	1.0663	0.7878	22.41	0	0	0	0	0	0.6817	2.9764	2.3049	2.486	2.9422
Negative	2.7034	206.082	2.7034_206.082	0	0	0	0	0	0	0	0	0	0	0	0	0	0	0	2.1023	0	0.9019	0	0	0	0	0	0	0	8.9669	0	0	0	6.2364	0	0	0	0	0	0	0	0	0	0
Negative	3.1218	207.012	3.1218_207.0117	0	0	0	0	0	2.6936	4.2724	3.2163	3.0902	4.0784	0	0	0	0	0	6.0369	5.1728	2.7423	3.0454	3.0087	0	0	0	0	0	2.1526	4.0983	3.2231	3.6156	3.2304	0	0	0	0	0	4.1827	2.8648	6.4595	5.555	6.2091
Negative	3.2246	207.012	3.2246_207.0119	0	0	0	0	0	3.1566	5.5118	3.2465	2.1317	0	0	0	0	0	0	8.3461	7.0871	3.3016	2.7125	3.0087	0	0	0	0	0	2.3092	3.9912	2.1605	2.4066	0	0	0	0	0	0	4.5135	3.2385	5.1601	3.8066	0
Negative	2.0886	207.065	2.0886_207.0653	6.89	5.0866	6.735	7.0618	6.3387	4.9591	3.8778	3.9924	4.3826	2.7235	9.5472	7.0459	6.2742	17.6113	6.1325	1.3549	3.051	5.4118	2.9699	4.1931	0	0	1.1058	1.5612	0	0	0	0	0	0	3.6486	3.864	2.4932	0	4.0187	0	0	2.8661	2.1637	2.7573
Negative	0.5207	208.987	0.5207_208.9865	0	0	0.3795	0	0.2897	1.6277	2.4687	1.7764	2.3616	1.8497	0	0.4505	0	0.4988	0	0	1.724	1.1877	0.9501	0.9305	0	0	0	0	0.261	0	1.6533	1.8428	1.8674	1.4311	0	0	0	0.4362	0	0.6933	1.0917	1.9977	1.5524	0.8956
Negative	0.6431	209.057	0.6431_209.0566	0	0	0	0	0	0	0	0	0	0	0	0	0	0	0	0	0.6012	0.5632	0	1.4234	0	0	0	0	0	0	0.7412	1.6412	0	0.5966	0	0	0	0	0	0.444	0.3416	0.3866	0	0.8376
Negative	0.513	209.063	0.513_209.0628	7.1226	5.3738	9.0736	6.5134	6.1057	1.6339	3.2945	3.0677	2.0487	1.5076	3.0502	4.2216	5.4017	5.9019	7.0616	1.3372	1.7786	2.6537	1.4678	1.9128	3.7155	4.3865	4.0916	6.1125	2.9829	1.27	1.861	1.6412	2.3224	1.5353	3.926	3.2204	4.8462	3.6402	3.1417	1.3426	1.6452	1.5021	1.3788	1.6485
Negative	4.3227	209.118	4.3227_209.1176	0	0	0	0	0	0.7242	0	0	1.5854	1.6249	0	0	0	0	0	0	3.0878	3.0433	4.6753	2.0585	0	0	0	0	0	0	0	0	0	0	0	0	0	0	0	1.4153	0.9628	2.2941	1.0294	0
Negative	6.9079	209.154	6.9079_209.1539	8.8691	6.7394	7.1728	7.09	6.1737	0	0.8628	0	0	0	9.3751	5.4058	6.8752	9.3004	5.557	2.8663	0	0.8994	0	0	8.8969	6.4348	6.3625	8.2654	7.4012	0.7635	0	1.0985	0	0.5177	7.6172	8.5635	7.7692	9.7737	13.2749	0	0	1.0403	0	1.0905
Negative	1.7204	210.043	1.7204_210.043	0	0	0	0	0	0	3.9983	3.8979	0.5192	0.5841	0	0	0	0	0	0	0	0.839	0	0.6359	0	0	0	0	0	0	0	0	0	0	0	0	0	0	0	0	0	0	0	0
Negative	0.6098	701.191	0.6098_701.1914	0	0	0	0	0	0	0	0	0	1.4399	0	0	0.4755	0	0	0	0	0	0	0	0	0	0	0	0	0	0	0	0	0	0	0	0	0	0	0	0	0	0	1.5638
Negative	1.9185	703.152	1.9185_703.1522	0	0	0	0.9882	0	1.8175	0	0	0	0	0	0	1.1321	0	0	0	0	0	0	0	2.5559	0	0	0.7832	1.8259	0	0	0	0	0	3.3848	3.211	3.2769	0	2.684	0	0	2.0753	0	0
Negative	6.1183	703.199	6.1183_703.1988	0	0	0	0	0	0	0	0	2.2425	0	0	0	0	0	0	0	0	0	0	0	0	0	0	0	0	0	0	0	0	0	0	0	0	0	0	0	0	2.3032	0	0
Negative	5.8803	703.202	5.8803_703.2019	0	0	0	0	0	0	0	0	3.4713	0	0	0	0	0	0	0	0	0	0	0	0	0	0	0	0	0	0	0	0	4.8132	0	0	0	0	0	0	0	3.6456	0	0
Negative	2.4047	703.227	2.4047_703.2266	0	0	0	0	0	0.6138	0	0	0.2897	0.4195	0	0	0	0	0	0	0	1.3621	0.7318	1.7732	0	0	0	0	0	0	0	1.3742	2.844	0	0	0	0	0	0	0.2936	0	0.3906	0	0
Negative	2.592	705.081	2.592_705.0806	0	0	0	0	0	1.4578	0.2536	0.2948	0.1686	2.6166	0	0	0	0	0	4.7812	0.4337	1.2539	6.4301	4.4259	0	0	0	0	0	0	0.0863	0.2789	0.0655	0.3277	0	0	0	0.1385	0	0	0.3181	7.0321	0.1249	0.258
Negative	1.9139	705.165	1.9139_705.1652	16.2696	11.1242	4.9242	12.4556	18.4958	20.8869	0	0	17.1163	3.7105	8.8239	0	18.1479	0	0	0	0	0	0.6549	0	37.9421	3.1198	41.7284	16.3715	27.233	0	23.8881	22.644	18.3361	0	49.109	44.7445	42.0125	47.149	28.6342	11.1707	12.0071	32.3315	16.8353	8.6636
Negative	1.7033	705.17	1.7033_705.1704	0	0	0	0	0	1.7175	0	0.4806	0	0	0	0	0	0	0	0	0	0	0	0	0	0	0	0	0	0	2.9967	2.6369	2.2042	0	0	0	0	0	0	0	0	0	0	0
Negative	5.0523	705.242	5.0523_705.242	0	0	0	0	0	0	2.8557	0	0	1.8294	0	0	0	0	0	0	0	0	0	0	0	0	0	0	0	2.7763	2.7074	3.6689	4.0414	3.9248	0	0	0	0	0	0	0	0	0	0
Negative	2.5269	705.247	2.5269_705.2472	0	0	0.101	0	0	0.9927	5.1254	5.9342	0.6307	3.7552	0	0	0	0	0	0	0	0	0	0	0	0	0	0	0	0	0	0	0	0	0	0	0	0	0	0	0	0	0	0
Negative	3.1426	705.26	3.1426_705.26	0	0	0	0	0	0	0	0	0	0	0	0	0	0	0	0	0	0	0	0	0	0	0	0	0	0	2.4163	2.6468	3.0403	0	0	0	0	0	0	0	0	0	0	0
Negative	3.2869	705.261	3.2869_705.2609	0	0	0	0	0	2.8046	2.1877	2.8921	1.7714	1.2618	0	3.8602	0	0	3.7067	11.7787	5.0744	5.7463	4.5534	4.2505	6.2772	5.4912	5.4465	4.8296	4.8319	14.8211	15.2145	18.8674	21.2073	16.347	4.2612	3.6182	3.5896	0	0	5.3155	6.0508	3.74	6.5759	4.4742
Negative	4.6326	705.277	4.6326_705.2771	0	0	0	0	0	0	0	0	0	0	0	0	0	0	0	0	0	0	0	0	0	0	0	0	0	3.8852	0	0	0	6.1776	0	0	0	0	0	4.9951	8.4394	0	0	0
Negative	8.4461	705.317	8.4461_705.3172	0	0	0	0	0	0	0	0.5203	0	0	0	0.4643	0	0	0	0	2.4701	1.3117	1.7516	0	0	0	0	0	0	0	0	0	0	0	0	0	0	0	0	0	0	0.4422	0	0
Negative	1.9239	707.157	1.9239_707.157	33.2825	30.2074	18.2485	6.3242	30.0814	3.3456	0	0	0	0	19.1873	0	0	2.7923	0	0	0	0	0	0	0	7.4575	84.3773	0	17.5949	0	10.3209	0	0	0	97.3308	83.2363	60.2321	0	0	0	0	0	0	0
Negative	1.9093	707.181	1.9093_707.1811	33.2825	30.2074	0	20.0712	30.0814	34.0803	0	0	34.2071	5.3425	0	0	29.9761	0	3.0412	0	0	0	0	0	72.533	7.4575	84.3773	29.7852	44.2579	0	73.145	73.4864	58.4813	0	97.3308	83.2363	60.2321	90.2311	42.3836	18.4142	19.8502	53.451	45.6918	16.9542
Negative	0.5204	210.972	0.5204_210.9721	0	0	0	0	0	1.7096	0.9419	0.6394	1.7697	2.2003	0	0	0	0	0.4892	0	0.9847	0.5883	0.6859	0.5533	0	0	0	0	0	0.4479	0.7474	0.8738	0.6253	0.6621	0	0	0	0	0	0.8863	0.5953	1.5329	1.5907	0.9492
Negative	2.1643	211.027	2.1643_211.0274	0	0	0	0	0	1.7464	3.7343	3.5705	0	0	0	0	0.5941	0	0	0	0	3.3298	0	1.7816	0	0	0	0	0	0	0	0	0	0	0	0	0	0	0	0	0	0	0	0
Negative	6.1438	211.131	6.1438_211.1311	0	0	0	0	0	0	0	2.0405	0.8434	0	0	0	0	0	0	0	0	0	0.7051	1.0173	0	0	0	0	0	0	0	0	0	0.4675	0	0	0	0	0	0	0	0	0	3.1649
Negative	6.5243	211.131	6.5243_211.1315	0	1.4103	1.5259	0	1.3127	0	0	0	1.4008	0.9916	0.9998	0	0	1.2215	0	0	4.3144	2.1799	0	0	0	0	0	0	0	0	0	0	0	0	0.6549	0	0	0	1.2242	0.6155	0	2.353	1.9594	0
Negative	5.1183	211.132	5.1183_211.1318	2.289	2.8111	3.1634	2.1327	2.3	0	0	0	0	0	3.4259	2.012	2.3087	3.4346	2.0934	0	0	0	0	0	3.6257	2.5647	3.2484	3.241	3.1282	0	0	0	0	0	2.0164	2.1552	2.9847	3.6023	4.808	0	0	0	0	0
Negative	6.2505	211.132	6.2505_211.1323	0	0	0	0	0	0	0.6805	2.4034	0	0	0	0	0	0	0	0	2.1832	0.8787	0.5475	0.7573	0	0	0	0	0	0	0	0	0	0.4528	0	0	0	0	0	0	0	0.9419	0	3.1548
Negative	6.4394	211.134	6.4394_211.1339	0	0	1.2598	0	1.0648	0.4008	0	0	1.7218	1.0718	0	0	0	0	0	0	4.0931	1.6598	0.1359	0	0	0	0	0	0	0	0	0	0	0	0	0	0	0	0.8732	0.4277	0.6315	1.7517	1.8231	0
Negative	4.791	211.134	4.791_211.1343	0	0	0	0	0.5973	0.9885	0	0	1.319	0	0	0	0	0	0	0	2.7738	0	0	0	0	0	0	0	0	0	0	0	0	0	0	0	0	0	0	0	0	1.6587	1.1509	2.2598
Negative	0.4547	212.919	0.4547_212.9186	7.1471	8.6198	15.0136	7.1921	7.2314	0	0	0	0	0	8.103	1.849	4.7961	6.3491	2.2734	0	0	0	0	0	5.1909	4.6641	5.9704	6.6012	5.745	0	0	0	0	0	2.7102	2.6178	2.7727	4.717	3.198	0	0	0	0	0
Negative	0.479	213.049	0.479_213.0491	1.5614	0	0.7146	1.3067	1.5027	0.3313	1.1254	0	0.5241	0.3318	0.6469	3.4641	0.7659	0	2.4406	0	0.4782	0	0.7419	0.2112	1.7572	1.7125	1.0907	1.0701	2.5921	1.9231	0	0.2095	0	1.7935	0.9798	1.8861	2.1115	0.7308	3.4599	1.769	0.4893	0.5935	0.66	1.0475
Negative	6.062	213.149	6.062_213.1494	0	3.4593	3.4526	2.3401	3.1411	0	0	0	0	1.6521	6.9659	2.0275	5.6333	5.0689	1.5096	0	0.9695	0	0	1.552	0	0	0	0.751	0	0	0	0	0	0	3.5941	0	1.0957	1.6539	0.9392	0	0.5493	3.7641	0	3.8735
Negative	4.61	213.15	4.61_213.1496	2.0616	6.6137	3.5288	2.5692	4.9199	0	0	0	0	0	7.0455	2.3525	5.8275	6.2017	3.9935	0	0	0	0	0	0.8429	0.8719	0	0.6727	3.003	0	0	0	0	0	3.0828	1.4803	1.239	2.3049	2.4219	0	0	0	0	0
Negative	4.3344	214.144	4.3344_214.1445	5.9345	7.1159	8.0425	9.3316	4.5364	0	0	0	0	0	10.951	4.6877	4.4248	7.2645	4.6568	0	0	0	0	0	9.0594	7.471	7.6414	8.6144	10.5877	0	0	0	0	0	6.5067	4.4108	6.1786	13.8223	12.1786	0	0	0	0	0
Negative	0.5005	215.032	0.5005_215.0322	8.4264	15.8693	18.3463	10.7568	10.6432	8.558	6.3441	6.0372	8.4325	6.6997	14.8337	10.556	14.1035	15.0922	11.746	4.088	4.6982	6.4465	4.6723	6.5144	14.1464	11.0134	13.3111	15.9742	13.0791	2.3798	6.8083	5.4414	5.272	3.4941	10.8898	9.5393	9.5453	14.3126	15.4848	5.3606	7.1916	7.4093	6.2852	9.4586
Negative	0.6036	215.034	0.6036_215.0335	0	0	0	0	0	0	0	2.8396	0	4.0676	0	0	0	0	0	0	2.6312	0	2.8202	0	0	0	0	0	0	0	0	0	0	1.8481	0	0	0	0	0	0	0	4.621	4.7842	0
Negative	1.9283	215.056	1.9283_215.0556	5.2169	2.9712	2.3178	5.2566	6.1884	2.2174	0	0	0	0	4.0651	0.8595	5.5329	2.5309	2.3467	0	0	0	0	0	8.0645	1.6903	6.4197	5.2853	7.0724	0	0	0	0	0	7.2712	6.9311	6.8518	8.4794	10.4896	0	0	2.46	0	0
Negative	1.719	707.183	1.719_707.1829	0	0	0	0	0	1.5699	0	0	1.7082	0	0	0	0	0	0	0	1.9241	0	0	0	0	0	0	0	0	0	6.427	6.1947	4.7008	0	3.8483	0	0	0	0	0	0	1.999	2.1744	0
Negative	1.6037	707.183	1.6037_707.1833	0	0	0	0	0	2.4849	0	0	3.2078	0	0	0	0	0	0	0	4.7748	2.3814	0.5715	1.6418	0	0	0	0	0	0	7.0899	7.8359	5.3622	0.9459	0	4.4153	0	0	0	0	0	2.1039	0	0
Negative	2.0659	707.184	2.0659_707.1838	0	0	0	0	0	0	0	0	0	0	0	0	0	0	0	0	0	0	0	0	0	0	0	0	0	0	1.8407	1.7805	1.827	0	0	0	0	0	0	0	0	0	0	0
Negative	1.4842	707.185	1.4842_707.185	0	0	0	0	0	0	0	0	0.98	0	0	0	0	0	0	0	0	0	0	0	0	0	0	0	0	0	2.0461	2.9913	0	0	0	0	0	0	0	0	0	0	0	0
Negative	2.5003	707.188	2.5003_707.1884	0.3781	0	0	0	0	0.6068	1.0916	1.0808	0	0.9461	0	0	0	0	0	7.3812	2.9352	0.9559	2.5003	0.6839	0	0	0	0	0	0	0	0	0	0	0	0	0	0	0	0	0	0	0	0
Negative	4.877	707.26	4.877_707.2605	0	0	0	0	0	0	0	0	1.6048	2.0765	0	2.9733	0	0	0	3.9804	0	0	0	0	0	0	0	0	0	0	3.8678	6.4218	5.8096	3.9854	0	0	0	0	0	0	0	0	0	0
Negative	3.702	707.265	3.702_707.2655	0	0	0	0	0	0	0	0	0	0	0	0	0	0	3.3304	8.9114	4.4827	7.9348	0	3.8784	0	0	0	0	0	0	0	0	0	0	0	0	0	0	0	0	0	0	0	0
Negative	3.3448	707.275	3.3448_707.2751	0	0	0	0	0	0	0	4.2234	0	0	3.3615	3.3358	3.8178	0	4.1538	3.379	8.6027	7.7056	6.1906	3.8902	0	0	0	0	0	0	0	1.0833	0	0	0	0	0	0	0	0	0	0	0	0
Negative	4.2316	707.291	4.2316_707.2909	0	0	0	0	0	0	4.2562	3.0444	0	0	0	4.2067	0	0	4.0563	0	0	0	0	0	0	0	0	0	0	41.345	0	2.3474	0	34.2697	0	2.7211	0	0	5.1258	17.0465	35.8323	0	10.7624	4.7647
Negative	4.1365	707.291	4.1365_707.2909	0	0	0	0	0	0	0	0	0	0	0	0	0	0	0	0	0	0	0	0	0	0	0	0	0	16.8953	0	0	0	13.9106	0	0	0	0	0	0	15.9698	0	0	0
Negative	2.761	707.294	2.761_707.294	0	0	0	0	0	1.5745	3.0409	2.505	0	0	0	0	0	0	0	5.2342	3.6991	0	0	0	0	0	0	0	0	4.3946	0	0	0	4.1531	0	0	0	0	0	0	0	0	0	0
Negative	4.9166	707.316	4.9166_707.3161	0	0.2612	0	0	0	0	0	0	0	1.4772	0	0	0.6858	0.5878	0	1.6034	1.6101	0	2.0563	0	0	0	0	0	0	0	1.0955	1.6686	0	0.8622	0	0	0	0	0	0	0	0.3018	0.9023	0
Negative	7.842	707.334	7.842_707.334	0	0.6859	0.7144	0	0	0	0	0	1.7041	0	0	0.5813	0	0	0.1888	0	0	0	0	1.4659	0	0	0	0	0	0	0	0	0	0	0	0.3199	0	0	0	0	0	0	0.6704	2.6527
Negative	4.868	707.337	4.868_707.3368	0.3571	0.5286	0	0	0.5572	3.0671	0	0	0	0	0	0	0.7575	0	0	0	0	0	1.1466	1.5016	0	0	0	0	0	0	0	0	0	0	0	0	0	0	0	0	0	0	0	0
Negative	5.9913	707.35	5.9913_707.3496	0	0	0	0	0	0	0	0	0	0	0	0	0	0	0	0	0	0	0	7.1369	0	0	0	0	0	0	0	2.2758	0	0	0	0	0	0	0	0	0	1.9332	0	0
Negative	8.3245	707.351	8.3245_707.3515	0	0	0	0	0	2.0935	0.884	0.8342	0	1.2973	0	0	0	0	0	0	0	0.9424	0	0.9033	0	0	0	0	0	0.2795	0.9639	1.4687	1.7794	0.6577	0	0	0	0	0	0	0	1.4545	1.235	0
Negative	5.5075	215.128	5.5075_215.1283	0	0	0	0	0	1.5871	1.0287	1.2129	0.8947	0.8366	0	0	0	0	1.8621	2.097	1.3632	1.2192	1.1709	0	0	2.5662	0	0	1.9874	0.8498	1.4691	1.0152	0.907	0.6742	2.1284	0	0	0	0	0	1.043	0	0.641	1.1699
Negative	0.6994	217.033	0.6994_217.0326	0	0	0	0	0	0	0	0	0.4558	0	0	0	0	0	0.5667	0	0	0	0.5162	0.6199	0	0	0	3.0389	0.7441	1.6489	0.5182	0.5941	3.1525	0	0	0	0	0	0	0	0	0	0	0
Negative	0.4879	217.047	0.4879_217.0467	3.1478	6.2151	6.5543	3.5533	3.9354	2.8286	2.2234	2.06	2.8353	2.2667	4.3605	3.9838	4.3491	6.2233	4.0822	1.6486	0	2.0725	2.0495	2.1486	4.7644	3.8196	4.7276	5.1119	4.5738	0	2.318	2.1405	2.2226	0	3.8081	3.0384	3.2024	4.4576	5.3294	4.7385	2.5911	1.9863	2.94	2.7404
Negative	3.2791	217.109	3.2791_217.1088	0	0	0	0	0	0.3884	0	0	0	0	0	0	0	0	0	6.9372	0	2.715	3.0356	0	0	0	0	0	0	0.3449	0	0	0	0.2096	0	0	0	0	0	0.4466	0	0	0	0.4997
Negative	1.2887	218.103	1.2887_218.1033	5.5504	4.5874	4.7802	5.396	5.7686	1.9521	0	1.0894	0	2.2835	2.4422	3.8245	3.8956	3.1208	3.803	3.4202	0	2.1974	0	1.4464	4.389	3.6295	7.0157	5.7293	2.2033	1.9908	0	0.7216	0	1.7228	4.5883	3.5259	3.5042	5.332	6.6546	7.937	0	0	7.3951	0
Negative	3.4723	219.102	3.4723_219.1016	0	3.1742	0	3.9222	3.1601	3.1878	4.887	5.0636	2.2318	1.4647	0	7.5862	0	0	0	0	0	0	0	0.8936	0	3.1948	0	3.6073	0	4.3658	3.2881	3.4337	4.3301	4.4791	0	0	0	0	0	0	0	0	1.3263	1.6698
Negative	3.0938	219.102	3.0938_219.102	4.551	4.8843	8.4877	7.7985	5.0464	3.3558	8.7596	9.4163	3.7884	3.5876	0	7.5883	0	0	0	0	0	0	0	0	1.1226	2.4371	1.8169	3.9293	0	2.6	0	2.5407	5.1252	4.8997	0	0	0	0	0	0	0	0	0	0
Negative	2.17	219.125	2.17_219.1252	0	0	0	0	0	0	0.9164	0	0	0	3.9858	0	0	4.4747	0	2.1936	0	0.9632	0	0	0	0	0	0	0	0	0	0	0	0	0	0	0	0	0	0	0	0	0	0
Negative	4.1004	221.066	4.1004_221.0656	0	0	0	0	0	3.2863	2.1097	0	2.6807	2.5098	3.8529	2.941	3.3978	5.2618	4.6344	6.6256	5.1526	5.2013	3.8015	5.0685	0	3.2901	0	4.054	4.7036	4.7561	5.04	4.8008	7.1872	3.5378	5.1234	4.3105	3.0056	0	5.1794	5.4881	7.2856	4.4592	5.1014	6.7587
Negative	3.0137	221.066	3.0137_221.0662	0	0	0	0	0	1.4246	3.5169	3.4381	1.8249	1.3517	0	4.0195	0	0	6.2093	8.6051	8.2783	8.3272	5.9426	3.8175	0	0	0	0	0	0	0	1.4126	1.7822	1.2414	0	0	0	0	0	4.0365	3.4413	2.9017	4.2633	2.5573
Negative	4.3143	221.066	4.3143_221.0663	0	0	0	0	0	1.0968	0	0	0	1.3043	0	0	0	0	0	1.3293	2.1086	2.4922	1.4971	1.884	0	0	0	0	0	0	0	0	0	0	3.0114	3.7472	0	0	0	4.2413	5.1797	4.675	3.7619	4.3854
Negative	3.9827	221.067	3.9827_221.067	0	0	0	0	0	2.5693	1.541	0	2.0294	1.6355	0	0	0	0	0	3.7655	2.362	2.9182	0	3.1229	0	0	0	0	0	3.0412	3.8358	3.9807	4.2026	2.1316	0	0	0	0	0	2.638	3.6912	3.2168	3.7526	4.0259
Negative	0.8471	223.032	0.8471_223.0323	0	0	0	0	0	0	0	0	0	0	0	0	0	0	0	0.6502	0	2.0195	1.0541	2.1035	0	0	0	0	0	0	0.7888	0	0	1.3406	0	0	0	0	0	0	0	0	0	0
Negative	1.1563	223.064	1.1563_223.0642	3.3685	3.6286	3.6949	3.9575	2.1859	2.0939	11.6485	11.7565	2.1469	3.7636	0	9.9563	1.6038	1.6889	4.1752	1.2503	9.066	8.999	3.0037	5.9689	1.2789	1.7765	0	1.0604	1.8469	3.5432	1.7772	1.5904	2.5508	5.5844	0	0	0	1.1213	0	0	0	3.1429	1.9183	1.4512
Negative	1.0715	223.065	1.0715_223.0648	0	0	0	0	0	0	0	0	0	1.4843	0	0.9336	0	0	0	1.3298	3.0805	3.6346	0	2.5321	0	0.7512	0	0	0	1.3953	0	0	1.381	2.4784	0	0	0	0	0	0	0	0	0	0
Negative	3.2038	223.133	3.2038_223.1328	0	0	0	0	0	0.7776	3.1315	3.1993	0	0.6425	0	4.5576	0	0	4.4866	6.1607	4.1253	2.616	2.5892	1.9386	0	2.9411	0	0	0	1.4261	1.7576	2.7243	1.6255	1.8721	0	0	0	0	0	1.2279	2.5356	0	1.6586	0
Negative	4.844	707.381	4.844_707.381	0	0	0	0	0	5.249	14.6383	5.8806	4.0204	3.084	0	7.5077	0	0	5.0081	14.7066	5.7715	8.4004	0	3.4345	0	0	0	0	0	3.7785	0	0	0	2.4366	0	0	0	0	0	0	0	0	0	0
Negative	5.2696	707.385	5.2696_707.3851	0	0	0	0	0	0	0	0	0	0	0	0	0	0	0	0	0	0	0	0	0	0	0	0	0	0	0	0	3.4662	0	0	0	0	0	0	1.3198	1.6208	2.7004	2.7531	3.5937
Negative	0.7144	709.109	0.7144_709.1091	0	0.5363	0.2486	0	0	1.0086	1.8029	1.2494	1.8493	1.0512	0	0	0	0.1836	0	0.277	2.4592	1.2279	1.2962	1.4472	0	0	0	0	0	1.1107	1.002	0.3742	0.8951	1.4331	0	0	0	0	0	2.7078	2.1655	2.8235	1.2392	0.7091
Negative	3.6144	709.27	3.6144_709.2704	0	0	0	0	0	0	0	0	0	0	0	0	0	0	0	0	0	0	0	0	0	0	0	0	0	0	0	0	0	0	3.1302	0	0	0	0	0	3.2014	0	0	0
Negative	3.4831	709.287	3.4831_709.2874	0	3.8799	0	0	0	0	0	3.1113	0	0	0	0	0	0	0	2.1512	3.2038	4.8862	2.9311	0	0	0	0	0	0	3.7308	0	0	0	0	0	0	0	0	0	0	0	0	0	2.5166
Negative	3.2109	709.291	3.2109_709.2907	4.0232	5.8245	5.5776	6.343	2.9177	0	4.9361	6.0841	0	4.757	6.7694	4.4424	4.5281	6.6436	4.6902	3.5607	7.1414	8.2532	4.5782	0	0	4.1611	4.0086	4.4292	6.0874	5.2655	0	0	0	0	3.9932	3.0687	3.5443	5.117	0	0	0	8.7914	0	1.5001
Negative	7.422	709.347	7.422_709.347	0	4.267	2.1438	1.5601	3.2888	0	0	0	1.958	1.7071	5.1054	1.8637	3.7667	2.9243	2.5474	0	0	0	1.3937	0	1.0689	0	0	0.3363	4.063	0	0	0	0	0	2.9758	0	1.4029	2.577	1.8794	0	0	4.6965	1.4793	10.1704
Negative	5.0696	709.401	5.0696_709.4009	3.5686	4.3378	0	0	4.5284	8.0697	5.6839	5.5648	5.6253	5.2751	3.8133	0	4.5242	4.9092	4.4819	0	6.6581	12.294	5.3012	7.4606	0	0	0	0	0	0	0	0	0	0	0	0	0	0	0	0	0	3.1567	3.5328	3.5433
Negative	3.0674	711.216	3.0674_711.2155	0	0	0	0	0	1.1501	0	0	1.4721	1.493	0	0	0	0	0	11.0323	5.0609	9.0902	6.027	6.5308	0	0	0	0	0	0.3333	2.1535	3.4178	1.7401	1.2222	0	0	0	0	0	1.2634	0	1.0907	1.7357	0.7572
Negative	2.2613	711.216	2.2613_711.2156	0	0	0	0	0	0	0	0	0	0	1.2821	0.3579	1.7597	1.1372	0.9626	0	0	0	0	0	0	0	0	1.3464	0	0	0	0	0	0	3.1544	3.1668	0	0	0	0	0	0	1.8204	0
Negative	0.4879	711.217	0.4879_711.2168	0	0	0.2905	0.2299	0.1647	0.1989	0	0	0.3755	0.5354	1.0095	0	1.2128	2.4051	0	0	0	0.0434	0	0.0951	0	0.5763	2.3323	0.6956	0	0.0806	0.0676	0	0.13	0	2.9286	1.799	1.2429	3.2572	0.3767	2.9212	0.7799	0.2947	0	0.6306
Negative	5.3798	711.318	5.3798_711.3183	0	0	0	0	0	0	0	0	0.3997	0.3555	0	0	0	0	0	0	0	1.1909	0	0	0	0	0.4241	0.2365	0	2.1902	4.9937	5.2443	4.4578	2.8751	0	0	0	0	0	0.5551	0.6796	1.2541	2.0684	2.43
Negative	0.3822	711.337	0.3822_711.3372	0	0	0	0	0	0.6282	0.6619	1.434	0.9557	1.0974	0.3089	0	0.2514	0	0	0	0.8273	0.6869	0.9734	0.4413	0.2568	0	0	0	0.162	0.7585	0	0	0.189	0.4921	0	0	0	0	0	4.4227	0.5424	0.5898	0	2.15
Negative	5.2472	711.375	5.2472_711.3754	0	0	0	0	0	1.2305	0	1.0099	1.9095	0	0	0	0	0	0	1.8616	0.9987	1.5117	0	1.6197	0	0	0	0	0	1.7522	4.476	2.9666	2.7794	1.6341	0.4965	0.3572	0	0	0	0	0.7218	0.9988	1.52	1.979
Negative	4.0842	711.398	4.0842_711.398	0	0	0	0	0	0.1911	0	0	0.2047	0.1629	0	0	0	0	0	2.0795	2.1529	2.5682	3.6118	3.4979	0	0	0.3078	0	0	0	0	0.1381	0	0	0	0	0	0	0	0	0	0	0	0.1193
Negative	4.9316	711.417	4.9316_711.4169	0	0	0	0	2.6488	2.6489	0	0	1.9619	1.3618	0	0	0	0	0	3.618	3.4014	4.2759	1.7609	3.0505	0	0	0	0	0	0.8717	1.8799	1.862	1.3629	0.6272	0	0	0	0	0	1.2242	1.6766	1.1752	1.1877	1.48
Negative	3.3395	225.049	3.3395_225.0495	0	0	0	0	0	0	0.9982	0	0	1.4026	0	0	0	0	0	0.4518	0	1.9124	0.9741	1.526	0	0	0	0	0	0	0	0	0	0	0	0	0	0	0	0	0	0	0	0.6442
Negative	5.8592	225.149	5.8592_225.1491	6.6974	6.5651	9.6431	8.7599	2.2854	0	0	0	0	0	7.826	6.1159	4.259	6.3092	5.4635	0	0	0	0	0	9.4469	8.0172	7.9791	8.9547	7.1169	0	0	0	0	0	7.5905	4.7542	9.7519	12.8115	8.4769	0	0	0	0	0
Negative	0.452	226.966	0.452_226.9658	2.1798	1.7659	1.4368	2.935	3.0819	0	0	0	3.0181	0	2.1372	1.5809	2.6261	1.5421	3.5112	0	0	0	1.7645	0	3.936	7.0309	2.5382	6.0225	4.2901	4.4459	5.4847	5.5082	5.3242	4.2941	6.1539	11.2856	7.3275	4.1248	8.6191	6.3746	0	6.8383	0	3.6463
Negative	0.6038	226.998	0.6038_226.9983	0	0	0	0.2184	0.2857	1.7706	1.8083	0	0	2.1967	0	0	0	0.5021	0	0	1.1923	1.2875	0.5281	0.5211	0	0	0.6201	0.3515	0.5832	0.6272	2.1424	0	2.1003	1.1626	0	0	0	0	0.4709	1.4835	0	1.8003	1.9308	0.8623
Negative	0.5302	226.999	0.5302_226.9986	2.6791	2.7664	3.2857	1.384	2.4091	2.6482	3.3024	2.5242	3.1237	3.4099	1.9562	1.4606	2.3927	2.743	2.6143	0	2.615	1.7947	1.2679	0.9189	1.4516	1.107	1.3295	1.5019	2.4139	0.7277	3.1092	2.5355	2.6817	1.4772	1.4	1.2431	2.798	2.0588	1.3754	0	2.1528	2.9539	2.4741	1.4713
Negative	2.2088	227.092	2.2088_227.0919	0	0	0	0	0	1.1947	1.7672	1.9817	0.9812	1.2211	0	0	0	0	0	4.7025	2.0627	2.0918	2.385	3.3296	0	0	0	0	0	1.9736	1.9282	1.961	2.5334	1.8063	0	0	0	0	0	0	2.07	0.9923	1.2514	2.9082
Negative	2.0627	227.092	2.0627_227.092	0	0	0	0	0	0.5154	0.8221	0.8751	0	0	0	0	0	0	0	2.0567	0.9163	0	0.833	1.2613	0	0	0	0	0	0.8496	0	0.8838	1.2277	0	0	0	0	0	0	0	0	0	0	1.0273
Negative	5.8768	227.129	5.8768_227.1285	0	0	0	0	0	2.9518	2.1162	4.7361	3.3999	5.0488	0	0	0	0	0	0	2.5564	3.137	5.533	5.2291	0	0	0	0	0	1.2405	0.6835	0.5781	1.1454	4.1117	0	0	0	0	0	1.3216	3.5474	10.9773	2.6536	18.2899
Negative	5.117	228.159	5.117_228.1591	25.9998	32.5826	34.6901	26.2163	24.8491	0	0	0	0	0	50.2037	23.2147	22.6713	33.3088	23.6321	0	0	0	0	0	42.6148	37.0683	35.8621	33.0311	36.9405	0	0	0	0	0	28.8747	23.2116	33.1913	46.4047	49.4341	0	0	0	0	0
Negative	0.4798	229.018	0.4798_229.0178	8.7009	3.5453	8.5119	7.4419	6.8822	0	0	0	0	0	3.5406	4.6566	1.2169	1.7381	4.1731	0	0	0.3506	0	0	2.1357	3.0161	1.8163	2.7951	4.3621	2.0311	0.2518	0	0	0.914	0	0	0	0	1.3055	0	0	0	0.4283	0
Negative	6.2816	229.143	6.2816_229.1429	0	0	0	0	0	1.1326	0.9422	1.4972	0.8431	0.9241	0	0	0	0	0	1.4567	2.0261	1.2571	0.7517	0.8221	0	0	0	0	0	0.5062	0.9269	0.8414	0.7401	1.0792	0	0	0	0	0	1.8564	1.9401	3.3022	1.7159	1.6727
Negative	1.322	230.014	1.322_230.0139	0	0	0.3206	0.3744	0	0.5105	0.8294	1.5872	0.6751	0.5592	0	0.5173	0	0	0.5378	0.7287	1.4962	1.9255	1.9908	2.1971	0.7366	0.4591	0	0.4639	0.361	1.5482	1.4783	1.5715	1.8067	2.0479	0	0	0	0	0	0	0.4007	0.313	0.3361	0
Negative	0.5691	232.885	0.5691_232.8849	2.1044	0	0	0.8112	2.8586	0	0	0	0	0	1.4639	4.5944	0	0	0	0	0	0	0	0	3.4475	0	0	0	0	0	0	0	0	0	0	3.4077	5.1886	0	0	0	0	0	0	0
Negative	0.6508	232.887	0.6508_232.8874	1.0025	0.7895	0	0	0	0.8562	1.5364	1.4602	1.3447	1.0943	0	1.1139	0	0	0.9076	1.0333	1.1982	1.2705	1.3331	1.7858	0	0.572	0	0.4237	0	0	2.1464	2.0599	2.4287	1.504	0.6357	1.1773	1.042	1.1986	0.6592	1.0257	0.7472	1.7679	1.2068	0
Negative	4.5136	236.095	4.5136_236.0951	0	0	0	0	0	1.7931	3.1941	1.8193	1.0508	2.4292	0	0	0	0	0	2.49	1.1011	3.2517	1.455	2.086	0	0	0	0	0	0.2814	1.7872	0	0.8378	1.5829	0	0	0	0	0	0.977	0	5.3521	1.6377	3.3449
Negative	7.5563	236.106	7.5563_236.1056	0	0	0	0	0	1.2477	0.937	1.9715	1.3248	0	0	0	0	0	0	1.045	0.7347	1.2462	2.0136	2.7513	0	0	0	0	0	0.4426	1.8189	0.5325	0.9279	0.6803	0	0	0	0	0	2.2943	3.951	0.6192	0.4819	2.0891
Negative	4.2812	713.192	4.2812_713.192	0	0	4.3246	4.9976	0	2.4235	0	0	3.322	2.6098	0	0	0	0.5396	0	0	0	0	0	0	0	0	0	0	0.2546	0	0	0.1416	0	0	0	0	0	0.3465	0	0	0	0	0	0
Negative	2.7428	713.225	2.7428_713.2249	0	2.5253	0	0	0	2.2952	0	0	2.6222	2.2176	0	0	0	0	0	0	0.9999	0	0	0	0	0	0	0	0	0.6214	1.6812	0.9922	1.6619	1.1584	0	0	0	0	0	0	0	1.627	0	0
Negative	2.8172	713.227	2.8172_713.2272	0	2.5253	0	0	0	0	0	0	2.1805	2.2176	0	0	3.2821	0	0	0	0	0	0	0	0	0	0	0	0	0	0	0	1.6599	0	0	0	0	0	0	0	0	0	0	0
Negative	0.4568	716.664	0.4568_716.6636	4.9176	6.5904	8.9618	4.2648	4.3883	0	0	0	0	0	4.1706	0	2.6891	4.013	0.6835	0	0	0	0	0	2.4102	1.7316	3.2483	3.7716	2.496	0	0	0	0	0	0.3741	0	0	1.7308	0.7928	0	0	0	0	0
Negative	0.4606	716.686	0.4606_716.686	4.9176	6.5904	3.4635	1.4841	4.3883	0	0	0	0	0	4.1706	0.7764	2.6891	4.013	1.3995	0	0	0	0	0	0	1.7316	3.2483	3.7716	2.496	0.1625	0	0	0.0741	0	1.0277	0.541	0.751	1.7308	0.7928	0	0	0	0	0
Negative	0.4524	716.703	0.4524_716.7031	4.9176	6.5904	0	0	4.3883	0	0	0	0	0	0	0.7764	2.6891	0	1.3995	0	0	0	0	0	0	1.7316	3.2483	3.7716	0	0	0	0	0	0	1.0277	0.541	0.751	1.7308	0.7928	0	0	0	0	0
Negative	2.5507	717.207	2.5507_717.2075	0	0	0	0	0	0.2433	0	0.4379	0.1584	0.4082	0	0	0	0	0	0.1282	0	0.1681	0	0.2877	0	0	0	0	0	2.5073	0.548	1.087	1.5233	5.1942	0	0	0	0	0	0.3995	1.3792	1.6011	4.849	5.9044
Negative	0.5014	719.175	0.5014_719.1747	0	20.687	20.9074	8.8215	11.1458	0	1.1932	0	0	2.074	14.8661	0	14.6071	16.7087	0	0	0.6874	0	0	0	8.9783	0	0.5755	1.924	14.5478	0	0	0	0	0	0	11.7844	0	11.4079	12.2915	0	0	1.6637	0	0
Negative	0.5139	719.198	0.5139_719.1979	8.4511	20.687	16.537	8.8215	11.1458	4.0787	2.5329	2.6876	7.0807	5.0648	3.072	9.5487	14.6071	16.7087	15.0574	0	2.1538	2.8303	3.255	5.7263	0	14.4397	16.104	13.5548	14.5478	0	0	2.8657	3.9898	1.7945	8.907	13.8654	13.3522	11.4079	12.2915	4.6278	4.3982	4.0417	0	7.5004
Negative	0.6043	719.199	0.6043_719.1991	0	0	0	0	0	4.0787	2.5329	2.6876	7.0807	5.0648	0	0	0	0.1469	0	0.2143	2.1538	2.8303	3.255	5.7263	0	0	0	0	0	0.5775	0	2.8657	0	1.7945	0	0	0	0	0	0	0	4.0417	0	7.5004
Negative	2.5538	719.223	2.5538_719.223	0	0	0	0	0	5.7274	6.6818	7.3046	4.1857	9.8978	0	0	0	0	0	2.0415	0.9278	1.2139	1.0318	1.0915	0	0	0	0	0	1.8218	0	0.5972	0.995	1.9509	0	0	0	0	0	0	2.3032	1.7597	3.5552	3.6349
Negative	2.4158	719.224	2.4158_719.2236	0	0	0	0	0	0	2.646	2.673	2.0739	3.6153	0	0	0	0	0	0	0	0	0	0	0	0	0	0	0	0	0	0	0	0	0	0	0	0	0	0	2.1504	0.9092	0	0
Negative	0.5769	719.245	0.5769_719.2447	0	0	0.0932	0	0	0	0	0	0	0	0	0	0	0	0	0	0	0	0	0	0	0	0	0.0612	0	0	2.7496	0	0	0	0	0	0	0	0	0	0	0	4.5539	0
Negative	2.4017	719.251	2.4017_719.2508	0.2281	0	0	0	0	0	0	0.9948	1.2721	0	0	0	0	0	0	0	0	0	0	0	0	0	0	0	0	2.2359	0	0	0.5826	1.9235	0	0	0	0	0	0	1.5412	0.9092	1.005	0
Negative	8.4447	719.387	8.4447_719.3867	0	0	0	0	0	0.4815	0.2812	1.1004	0.9044	0	0	0	0	0.2189	0	0	1.0581	1.01	0.9283	1.4072	0	0	0.2179	0	0.2534	0	0	0	0	0	0	0	0	0	0	0	1.2048	0	1.0706	1.4633
Negative	8.5854	719.387	8.5854_719.3868	0.5101	0	0	0.8928	0	0.6853	0.5742	2.0912	1.8741	0	0	0	0	0	0	0	1.3117	1.2894	2.0588	1.649	0	0	0	0	0	0	0	0	0	0	0	0	0	0	0	0.7987	1.3277	0	0	4.4046
Negative	3.1448	237.039	3.1448_237.0393	0	0	0	0	0	0	0.1915	0	0.2829	0	0	0	0	0	0	0.716	0	0	0	0	0	0	0	0	0	1.5948	0	0	0	1.6791	0	0	0	0	0	0	0	0	0	0
Negative	3.4589	237.041	3.4589_237.0408	0	0	0	0	0	6.0107	4.7997	6.0145	6.8492	4.6305	0	0	0	0	0	5.4195	2.5046	8.2395	4.7676	7.5958	0	0	0	0	0	6.0415	6.3409	7.1026	4.4008	5.4295	0	0	0	0	0	1.2578	2.6359	4.3416	4.3439	3.2585
Negative	3.2812	237.041	3.2812_237.0409	0	0	0	0	0	1.3188	0.7596	0.8854	1.1037	0.7506	0	0	0	0	0	0	0.4525	0	0.2698	0.2671	0	0	0	0	0	1.4165	1.1924	1.9718	1.4221	1.2564	0	0	0	0	0	0	0	0	1.0957	0.5626
Negative	3.3512	237.041	3.3512_237.0412	0	0	0	0	0	0.7928	0	0.4678	0.7501	0	0	0	0	0	0	0	0	0.587	0	0	0	0	0	0	0	1.3494	1.3659	1.9346	1.0747	1.4792	0	0	0	0	0	0	0	0	0.7885	0.7176
Negative	3.6076	237.043	3.6076_237.0432	0	0	0	0	0	8.1497	7.72	9.697	5.3552	6.7443	0	0	0	0	0	12.1973	7.0579	17.9242	7.0127	15.7665	0	0	0	0	0	0	0	0	0	0	0	0	0	0	0	0	0	0	0	0
Negative	4.4322	239.06	4.4322_239.0596	0	0	0	0	0	0.9523	0.9296	1.9514	1.4061	2.1684	0	0	0	0	0	0.562	0.711	2.6105	0.8551	2.0262	0	0	0	0	0	0.1669	0	0	0	0	0	0	0	0	0	0	0	0	0	0
Negative	3.9088	239.128	3.9088_239.1284	0	0	0	0	0	0	0	0	0	0	0	0	0	0	0	0	0	5.363	0	0	7.0585	0	0	3.3673	0	0	1.6097	1.5974	1.7672	0	0	0	0	0	0	0	0	0	0	0
Negative	3.3689	239.129	3.3689_239.1286	8.9942	11.7395	5.9803	19.6896	17.4246	8.3759	2.469	3.3402	4.9717	4.6615	0	0	0	0	0	0	0	0	0	0.0942	0	0	0	0	0	0	0	0	0	0	0	0	0	0	0	0	0	1.0314	0	0
Negative	3.1182	239.13	3.1182_239.1297	0	0	0	0	0	4.8181	1.1211	0	2.9391	2.9796	0	0	0	0	0	0	0	0	0	0	0	0	0	0	0	0	0.3929	0	0	0	0	0	0	0	0	0	0	0	0	0
Negative	4.1501	239.13	4.1501_239.1299	1.3379	0.5543	0.9321	1.2997	1.3211	1.6477	1.7437	0	0	1.4681	0	3.1337	4.955	0	0	0	0	0	0	0	0	0	0	0	0	0	0	0	0	0	0	0	0	0	0	0	0	0	0	0
Negative	4.7922	240.911	4.7922_240.9114	0	0	0	0	0	1.6435	0	2.0007	1.7603	1.6982	0	0	0	0	0	1.7289	2.5332	2.8876	1.9403	2.0242	0	0	0	0	0	1.5019	2.3874	1.8197	2.2159	2.0614	0	0	0	0	0	2.7573	2.189	1.9618	2.0575	1.8119
Negative	4.6783	240.912	4.6783_240.9125	0	0	0	0	0	0	0	0	0	1.5111	0	0	0	0	0	0	0	0.4008	0	1.309	0	0	0	0	0	0	0.1152	0	1.0707	1.5964	0	0	0	0	0	0	0	0	0	0
Negative	0.5175	241.011	0.5175_241.0111	0	0	0	0	0	1.263	2.2028	1.7827	1.3288	1.4326	0	0	0	0	0	0.6781	1.6613	1.1754	0.8118	0.6892	0	0	0	0.4707	0	0.5284	1.5557	1.1601	1.6285	0.5574	0	0	0	0	0	0.9021	1.241	1.1236	0.9364	0.8703
Negative	1.0594	241.085	1.0594_241.0855	0.5312	0	0	1.0348	0.5697	0.4888	0.3125	0	0	0.3357	0.7425	0.9982	0.8294	0.4857	1.3903	1.9641	0.533	1.863	1.7631	0.7733	1.0812	0.9182	0.9728	1.7459	0.6804	0.3672	0	0.8016	0.2847	0.5619	0.7654	0.7331	0	0	0.9937	1.165	2.2385	0.8498	0	0.3033
Negative	0.4828	242.076	0.4828_242.0762	2.2244	3.3645	3.731	3.3077	0.9012	0.3471	2.4473	1.352	0	0.9438	0	0.6824	0.52	0.257	0	0	0	0	0	0	0	0	0	0.2415	0	1.4224	0	0	0	0.5023	0	0	0.497	0	0.32	0.5016	0	0	0.1983	0.4076
Negative	5.8576	242.172	5.8576_242.1723	99.8888	96.8416	139.287	126.3	42.8549	5.7602	4.0628	4.6544	4.3074	4.8743	130.896	89.9116	71.346	104.352	85.0227	5.3647	9.319	2.3521	4.1893	4.1657	153.885	117.219	131.734	119.088	113.582	2.9899	6.4104	3.705	6.439	3.4563	115.118	81.548	131.76	178.216	131.865	8.1314	6.184	4.2911	3.4454	4.862
Negative	7.8486	719.404	7.8486_719.4036	0.2463	0	0	0	0	0.9666	1.5878	1.1809	0.429	1.4974	0	0	0	0	0	0.6732	0	0.5404	0	0.5295	0	0	0	0	0	1.4645	0.4512	0.4593	0.5805	2.4936	0	0	0	0	0	0.174	0	0.4122	0.3967	0
Negative	3.0182	721.188	3.0182_721.1879	0	0	0	0	0	0	0	0	0	0	0	0	0	0	0	0	0	0	0	0	0	0	0	0	0	1.1463	0	0	0	1.7747	0	0	0	0	0	0.5841	3.1992	0	0	0.4841
Negative	1.9933	721.199	1.9933_721.1988	0	0	0	0	0	1.8931	0	0	0	0	0	0	0	0	0	2.8412	6.1696	0	0	0	0	0	0	0	0	3.6906	19.6502	20.622	17.8838	3.6754	0	0	0	0	0	0	0	0	0	0
Negative	1.7682	721.199	1.7682_721.1993	0	0	0	0	0	0	0	0	0	0	0	0	0	0	0	0	0	0	0	0	0	0	0	0	0	0	5.4929	4.031	2.5979	0	0	0	0	0	0	0	0	0	0	0
Negative	1.8768	721.199	1.8768_721.1995	0	0	0	0	0	0	0	0	0	0	0	0	0	0	0	0	4.2576	0	0	0	0	0	0	0	0	0	11.292	8.6337	8.2263	0	0	0	0	0	0	0	0	0	0	0
Negative	5.2987	721.213	5.2987_721.213	0	0	0	0	0.5968	4.3977	1.4483	1.8153	3.4861	2.3826	0.7068	0	0	0	0	0	0.7667	0	0	0.8965	0	0	0	0	0	2.1334	3.1505	1.8317	0	3.311	0	0	0	0	0	0	0	2.1723	0	0
Negative	2.8778	721.216	2.8778_721.2163	0	0	0	0	0	0	0	0	0	0	0	0	0	0	0	0	0	0	0	0	0	0	0	0	0	1.4204	0	0	0	2.0479	0	0	0	0	0	0	0	0	0	0
Negative	5.1798	721.218	5.1798_721.2177	0	0	0	0	0	1.8926	0	0	0	0	0	0	0	0	0	0	0	0	0	0	0	0	0	0	0	1.2169	1.7806	1.3751	0	2.317	0	0	0	0	0	0	0	1.9421	0	0
Negative	5.0378	721.219	5.0378_721.2193	0	0	0	0	0	1.8055	0	0	1.8645	1.3541	0	0	0	0	0	0	0	0	0	0	0	0	0	0	0	0	1.0741	0.7841	0	0	0	0	0	0	0	0	0	1.9339	0	0
Negative	2.7394	721.255	2.7394_721.255	0.341	0	0	0	0	0	0	0	0	0	0	2.5592	0	0	0	3.5237	2.1415	2.2573	1.3774	1.9613	0	0	0	0	0	7.2302	7.0564	6.2904	8.3422	10.3187	0.5739	0	0	0	0	3.6044	4.1019	3.0552	4.3598	3.8272
Negative	2.3727	721.273	2.3727_721.2728	0	0	0	0	0	0	2.1333	2.8202	1.1629	1.5528	0	0	0	0	0	0	0	0	0	0	0	0.7244	0	0	0	0	0	0	0	0	0	0	0	0	0	0	0	0	0	0
Negative	5.6213	721.332	5.6213_721.3316	0	0	0	0	0	0.1821	0	0	0	0	0	0.2832	0	0	0	0	0	0	0	0	0	0	0	0	0	2.0853	1.0121	0.8511	0.7678	2.5898	0	0	0	0	0	0	0	0	0	0
Negative	0.3834	721.362	0.3834_721.3621	0.3932	0.4455	0.2324	0.4156	0.3293	2.4714	5.2759	11.4106	10.0464	7.9581	0	0	0.282	0.2937	0.1222	0	5.5239	5.8669	9.1455	5.0887	0	0.3168	0.6883	0.8561	1.1016	2.9062	0	0	1.5784	4.4765	0	0.259	0.33	0.3339	0.1883	16.5167	4.0379	4.3599	0	19.4854
Negative	5.2025	721.364	5.2025_721.3641	0	0.2052	0	0	0	0	0	0	0	0	0	0	0	0	0	0	0	0	0	0	0	0	0	0	0	1.8207	0.9273	1.3582	1.0393	1.533	0	0	0	0	0	3.0741	5.5856	0.9856	2.5272	2.4483
Negative	6.9634	721.367	6.9634_721.3671	0	0	0	0	0	0.3234	0.1673	0	0	0	0	0	0	0	0	1.8197	0.8258	1.161	2.1299	4.4816	0	0	0	0	0	0.4691	1.3831	3.4454	0.3851	0.3574	0	0	0	0	0	0.3874	0.223	0.4544	0.5774	0.2947
Negative	0.3823	721.406	0.3823_721.4062	0.3932	0	0	0	0.3293	0	0	0	0	0	0	0	0.2173	0	0	0	0	0	0.049	0	0.5325	0	0	0.0306	0	0	14.8217	0	0	0	0	0	0	0	0	0	0	0	9.2933	0
Negative	8.0163	242.176	8.0163_242.1762	3.1128	3.0624	4.3042	3.3286	1.5051	0	0	0	0	0	5.1912	3.3197	1.1547	2.5684	2.9351	0	0	0	0	0	4.3425	4.8885	3.8079	2.8102	4.6722	0	0	0	0	0	3.3425	1.9041	3.2687	3.7249	1.8891	0	0	0	0	0
Negative	0.4519	242.939	0.4519_242.9391	11.0502	17.9525	15.4122	11.7986	12.2418	2.6381	0	2.1535	7.8617	1.8686	11.6053	2.6655	7.8209	8.9173	9.9453	0	0	0	0	0	7.5729	9.4448	5.9062	13.0365	7.9775	7.1983	5.8627	5.4811	7.0953	6.3349	6.564	10.9436	6.6712	5.9351	7.0487	2.9715	0	2.9649	2.4871	0
Negative	0.7205	243.063	0.7205_243.0631	0	0	0	0	0	0.5596	0	0.6781	1.1727	0.9336	0	0	0	0	0	1.8692	0.9353	1.1685	2.2826	2.0003	0	0	0	0	0	0	0.5214	0.7102	0.9261	0.8029	0	0	0	0	0	0.576	1.1858	1.2189	0	1.4392
Negative	3.9001	243.124	3.9001_243.1242	0	0	0	0	0	0	0	0	0	0	0	0	0	0	0	4.0157	0	2.4448	1.8857	0	0	0	0	0	0	0	0	0	0	0	0	0	0	0	0	0	0	0	0	0.7269
Negative	7.0723	243.159	7.0723_243.1594	10.1861	8.1714	13.9351	12.0777	4.8507	2.2251	1.9861	2.211	0	0	16.019	9.8963	2.5872	17.0197	12.1676	2.9472	4.5696	0	1.6328	0	14.5581	16.7596	10.3029	10.8805	14.1156	0	2.3	0	0	0	11.7224	9.2004	9.4383	15.2942	10.3632	0.5598	0	0	0	1.4665
Negative	8.0559	243.194	8.0559_243.1943	0	0	0	0	0	0	0	0	0	0	0	0	0	0	0	0	0	3.1475	2.145	0	0	0	0	0	0	0	0	0	0	0	0	0	0	0.5	0	0	0	0	0	0
Negative	8.6851	243.195	8.6851_243.1949	0	0	0	0	0	0	0	0	0	0	0.7937	1.0211	0.6948	1.2492	0.8067	5.0101	2.6576	1.9611	3.5251	1.2287	0	0	0	0	0	0	0	0	0	0	0	0	0	0	0	0	0	0	0	0
Negative	7.1173	243.196	7.1173_243.1956	0	0	0	0	0	0	0	0	0.1873	0	0	0	0	0	0	0	0.9199	1.8381	2.638	1.6009	0	0	0	0	0	0	0	0	0	0	0	0	0	0	0.4709	0	0	0	0	0
Negative	2.1108	244.027	2.1108_244.027	7.7589	9.0579	7.6754	9.2904	6.4206	17.546	40.6188	42.7181	13.4338	17.2738	6.4466	23.504	6.9865	0	8.5826	14.5377	11.1552	27.4362	9.7771	26.8416	0	0	0	0	0	0	0	0	0	0	0	0	0	0	0	0	0.3197	1.9941	0	0.2738
Negative	1.8991	244.028	1.8991_244.0282	0	0	0	0	0	5.3183	10.1413	8.7294	3.6445	2.5852	0	0	0	0	0	2.2388	2.9214	8.2733	2.5671	5.0807	0	0	0	0	0	0	0	0	0	0	0	0	0	0	0	0	0	0.6457	0	0
Negative	1.785	244.028	1.785_244.0283	0	0	0	0	0	2.5711	7.5331	7.9013	2.3309	2.3463	0	0	0	0	0	1.8499	2.1656	7.6158	0	4.7165	0	0	0	0	0	0	0	0	0	0	0	0	0	0	0	0	0	0.3341	0	0
Negative	0.4422	244.951	0.4422_244.9513	2.3354	4.5392	4.5898	2.6837	3.1752	0	0.9435	0	2.2477	1.3931	2.5088	0	1.7956	2.0561	2.0015	0.9616	0	0	0	1.2655	1.7246	1.5247	1.6595	2.4595	1.5894	0.9825	0.9773	0.9203	1.0707	0	1.1722	1.7016	1.5743	2.0065	2.3543	1.1725	1.043	0.9482	0.9065	0.7866
Negative	2.5393	245.012	2.5393_245.0118	0	3.5201	0	0	0	1.6143	4.7044	4.7292	2.4492	3.6795	0	0	0	0	0	0	0	6.8016	1.1081	4.422	0	0	0	0	0	0	0	0	0	0	0	0	0	0	0	0	0	0.7708	0	0
Negative	0.5067	245.041	0.5067_245.0406	7.0244	5.9446	11.6148	5.7294	3.7094	3.0465	5.0246	2.4971	1.9768	2.8183	4.7629	2.8649	4.978	2.4777	1.0153	1.8781	0	1.0536	0	1.3494	4.1879	0.8565	6.4164	3.1812	1.6525	1.7638	3.6881	3.1283	3.5574	0	3.2337	4.6212	6.745	7.3754	5.6076	0.5819	0.9617	0	0	0
Negative	0.6036	245.046	0.6036_245.0462	0	0	0.6525	0	0	3.0465	5.0246	3.1257	1.9768	2.8297	0	0	0	0	0	0.5853	0.7166	1.1762	1.0419	0.9797	0	0	0	0	0	0.8503	3.6881	3.1283	3.5574	0.6962	0	0	0	0	0	1.358	1.7051	0.7139	0.7009	0.8223
Negative	3.0665	245.09	3.0665_245.0905	0	0	0	0	0	0	0.4888	0.5443	0	0.23	0	0	0	0	0	0	0	0	0.4778	0	0	0	0	0	0	146.137	0	0	0.1945	104.645	0	0	0	0	0	4.0256	23.2594	1.0466	2.8012	3.0252
Negative	4.838	723.171	4.838_723.1711	0	0	0	0	0	1.8836	1.5718	1.6734	1.3054	1.3228	0	0	0	0	0	1.5264	1.9209	1.1591	1.5627	0.3671	0	0	0	0	0	1.7919	1.7177	1.0857	1.1419	1.6633	0	0	0	0	0	2.9051	2.796	3.2161	2.8389	2.0946
Negative	1.9373	723.178	1.9373_723.1779	1.4468	1.1049	0.7925	1.5059	1.4288	0	0	0	0	0	0.7246	0	1.2409	0	0	0	0	0	0	0	3.6734	0.8613	3.7504	1.8878	3.6265	0	0	0	0	0	3.1357	3.3851	2.4965	3.3552	1.7336	0	0	0	0	0
Negative	3.5058	723.253	3.5058_723.2534	0	0	0	0	0	0	0	0	0	0	0	0	0	0	0	4.7307	0	3.4576	0	0	0	0	0	0	0	0	0	0	0	0	0	0	0	0	0	0	0	0	0	0
Negative	3.7459	723.288	3.7459_723.2877	0	0	0	0	0	0	0	0	0	0	0	0	0	0	0	0	0	2.344	0	1.6591	0	0	0	0	0	2.8396	0	0	0	2.159	0	0.3895	0	0	0	0	0	0	0	0
Negative	5.4945	723.348	5.4945_723.3479	0	0	0	0	0	0	0	0	0	0	0.3088	0	0	0	0	0	0	0	0	0	0	0	0	0	0	2.0841	0	0.8547	0	2.3352	0	0	0	0	0	0	0	0	0	0
Negative	5.0513	723.376	5.0513_723.376	0	0	0	0	0	0	0	0	0	0	0	0	0	0	0	0	0	0	0	0	0	0	0	0	0	0	0	0	0	0	0	0	0	0	0	2.2211	3.804	1.1052	1.8226	1.2179
Negative	4.4718	723.378	4.4718_723.3778	0	0	0	0	0	0	2.6018	0	0	0	0	0	0	0	0	4.868	0	2.0513	0	0	0	0	0	0	0	0	0	0	1.1124	0	0	0	0	0	0	0	0	0	0	0
Negative	3.2713	724.192	3.2713_724.1918	0.2979	0	0	0	0	0	0	0	0	0	3.199	0.4081	3.0179	6.7955	0.6536	0	0	0	0	0	0.3376	0	0.2229	0.0927	0	0	0	0	0	0	0	0	0	0	0	0	0	0	0.0433	0
Negative	2.9041	724.284	2.9041_724.2836	0	0	0	0.1013	0	0.13	0.304	0.3249	0	0.1984	0	0	0	0	0	1.8105	0	0	0	0	0	0	0	0	0	3.3409	0	0	0	3.815	0	0	0	0	0	0	0.3823	0	0.36	0.679
Negative	3.4276	725.174	3.4276_725.1743	0	0	0	0	0	0	0	0	0	0	1.7414	0	0	1.472	3.6361	0	0	0	0	0	5.1671	1.7185	4.2583	1.8549	5.3987	0	0	0	0	0	0	0	0	0	0	0	0	0	0	0
Negative	2.574	725.198	2.574_725.1982	4.3775	4.1841	3.6298	5.2255	5.8038	0	0	0	0	0	2.1815	4.3534	1.8194	2.7482	3.5972	0	0	0	0	0	0	2.4024	0	1.7148	1.3549	0	0	0	0	0	1.0194	0.8183	0.7554	0.7545	1.1781	0	0	0	0	0
Negative	2.2285	725.199	2.2285_725.199	0	0	0	0	0	0	2.7789	0	0	0	0	3.0818	0	0	3.0582	0	0	0	1.8023	0	0	4.4922	0	0	0	1.7712	0	0	0	1.5109	0	0	0	0	0	0	0	0	0	0
Negative	1.9303	725.2	1.9303_725.1997	2.4118	3.164	0	2.552	0	0	0	0	0	0	0	0	0.6825	0	0	0	0	0	0	0	7.1332	4.618	5.062	6.147	8.9239	0	0	0	0	0	0	0.997	0	1.5558	0	0	0	0	0	0
Negative	3.2335	725.285	3.2335_725.2855	3.2959	0	0	0	0	3.9959	0	5.3444	6.0544	4.4177	0	0	6.6933	7.2474	0	2.628	7.0072	8.331	0	4.5	0	0	0	0	0	5.6336	6.919	5.6251	6.0194	8.5749	0	0	0	0	0	5.513	5.4763	10.294	10.5537	12.5344
Negative	2.8663	725.286	2.8663_725.2863	0	0	0	0	0	1.4142	2.1392	0	2.3362	0	0	0	0	0	0	1.8352	0	2.1685	0	2.2891	0	0	0	0	0	2.891	3.7567	1.2276	1.8497	0	0	0	0	0	0	0	2.5888	2.6273	4.7779	3.6612
Negative	2.9795	725.287	2.9795_725.2869	6.697	10.7192	5.1882	8.5931	5.8025	6.5025	6.1253	8.974	7.3045	6.9575	12.7704	7.1668	8.5585	9.25	8.4569	4.3091	10.7912	11.2454	6.7323	6.3594	14.147	17.905	14.4204	15.3881	22.1607	12.2759	11.8195	8.5673	12.2745	24.3714	11.0739	8.4148	10.3833	12.7487	6.5079	8.8745	6.4719	15.3802	12.3789	14.8928
Negative	3.199	245.092	3.199_245.0919	0	0	0	0	0	0	0.5129	0	0.2932	0	0	3.7936	0	0	0	0.7541	0	0	0.8217	0	0	0	3.5048	0	0	423.155	2.2149	0.2645	0	293.75	8.1474	4.3106	0	0	0	12.8875	63.058	2.7955	8.2918	8.6124
Negative	2.9812	245.093	2.9812_245.0931	0	0	0	0	0	0	0.2572	0.4195	0	0	0	0	0	0	0	0	0	0	0	0	0	0	0	0	0	112.654	0.4308	0	0	51.2359	0	0	0	0	0	0	0	0	1.8555	1.6996
Negative	1.9039	245.103	1.9039_245.1028	1.9433	1.4087	0	2.1841	3.2144	0	0	0	0	0	1.0814	0.9657	0.9623	0.4773	1.3154	4.2998	2.6306	0	1.732	0	3.1338	1.4517	0.608	1.8345	1.9117	0	0	1.1916	1.1483	0.6113	1.7223	1.6742	1.5461	0.4231	1.7422	0	0.8466	0	0	0
Negative	4.1318	245.138	4.1318_245.1384	0	0	0	0	0	1.1915	0.5468	0.4699	0.886	1.3809	0	0	0	0	0	2.072	0.8061	1.0874	1.2527	0.862	0	0	0	0	0	0	0	0	0	0.2055	0	0	0	0	0	0	0	0	0	0
Negative	0.4564	248.961	0.4564_248.9611	0	0	0	0	0	0.3365	0.2124	0.271	0	0	0	0	0	0	0	0.453	0	0.1815	0	0.2283	0	0.8786	0	0.3363	0.972	0.3066	0	0	0	0	0.7303	2.9548	5.6343	1.9649	4.4935	0	0	0	0	0
Negative	2.7677	249.062	2.7677_249.0616	4.0075	4.3394	4.0541	3.6895	5.2444	0	0	0	0	0	5.5997	8.4528	4.6217	5.1648	6.5642	2.1856	2.4385	2.3228	1.6284	0	9.0799	9.1388	8.4159	9.4671	9.4825	0	2.4336	1.9728	0	0	3.7164	4.2707	4.8151	3.3224	5.4432	0	1.1073	0	0	0
Negative	3.139	249.082	3.139_249.0817	0	0	0	0	0	0	3.1336	3.553	0	0	0	0	0	0	0	0	0	0	0	0	0	3.818	0	0	0	2.1221	0	2.5654	3.4077	5.0974	0	0	0	0	0	0	7.3886	2.4672	4.0722	3.3041
Negative	3.2246	249.134	3.2246_249.1338	2.8236	0	0	0	0	8.3702	3.5181	3.4675	6.1727	4.7198	19.188	5.3302	18.8239	27.9858	6.9094	15.2624	11.92	9.3413	10.0319	3.3496	0	0	3.4732	0	0	0	0	0	0	0	0	0	0	0	0	0	0	0	0	0
Negative	3.0895	249.134	3.0895_249.1339	0	0	0	0	0	0	0.9669	2.1508	2.251	0	0	0	0	0	0	0	0	3.6914	0	1.326	0	0	0	0	0	0	0	0	0	0	0	0	0	0	0	0	0	0	0	0
Negative	5.5843	249.149	5.5843_249.1489	0	0	0	0	0	0	0	0	0	0	0	0	0	0	0	1.3018	1.417	2.3176	2.0801	1.8953	0	0	0	0	0	0	0	0	0	0	0	0	0	0	0	0	0	0	0	0
Negative	3.7083	251.095	3.7083_251.095	0	0	0	0	0	0	0.7394	2.1024	0.5687	0.5605	0	0	0	0	0	0.5788	0.3744	0.4661	0.9385	0.7343	0	0	0	0	0	3.416	0	0	0.7893	1.8503	0	0	0	0	0	0	0	0	2.2723	4.3926
Negative	7.3985	253.092	7.3985_253.092	0	0	0	0	0	1.9385	2.225	1.5915	0.3441	0.3038	0	0	0	0	0	0.6712	0.8657	0.5808	5.0469	2.6465	0	0	0	0.219	0	0.9336	1.1222	1.6288	0.4724	1.2649	0	0	0	0	0	0.3908	0.3964	1.103	0.5685	0.4229
Negative	4.6076	253.093	4.6076_253.0925	4.9616	18.1402	9.5333	6.3161	14.21	0	0	0	3.9229	0	19.9248	6.3525	14.6012	15.9531	11.1383	0	3.5798	0	0	1.7451	0	0	0	0.9478	8.9001	0	0	0	0	0	8.3779	4.0836	3.5007	6.7614	5.0562	0	0	4.829	2.397	6.2474
Negative	2.3505	253.107	2.3505_253.1072	0	0	0	0	0	1.1187	0	0	0.6113	0.8586	0	0	0	0	0	0	0	0	0	0.879	0	0	0	0	0	1.2646	1.6501	2.34	2.6695	1.4635	0	0	0	0	0	0	0	0	0	0
Negative	6.9035	253.146	6.9035_253.1458	3.2732	2.8531	3.0964	2.6521	2.3271	0.5073	0.7693	0	0.5833	0.5186	4.185	2.3948	2.5558	3.0039	2.2049	2.2837	0	0.6773	0	0.5862	3.8072	2.2509	2.9119	2.863	2.9809	0.5988	1.1424	0.9697	0.6613	0	3.5458	3.421	2.8757	4.5552	3.861	0.7301	0.8553	0	0	0.959
Negative	2.4206	255.122	2.4206_255.1219	13.1979	10.829	5.1271	9.4965	13.2693	17.9832	6.0059	7.1113	12.9873	14.3428	38.7631	17.1614	21.2311	55.339	56.1026	41.9697	30.1375	52.2227	27.285	39.056	63.2012	100.22	49.2141	88.7783	92.6298	55.6925	108.473	125.132	110.881	80.7887	6.6006	8.3952	8.4644	5.8954	12.9747	5.4493	7.8605	7.2517	8.7457	10.099
Negative	2.7936	725.29	2.7936_725.2901	0	0	0	0	0	0	0	0	0.8503	1.2648	0	0	0	0	0	0	0	2.7553	0	0	0	0	0	0	0	0	1.7793	1.6598	1.904	2.8983	0	0	0	0	0	1.2588	0	2.7931	2.5275	2.964
Negative	3.8856	725.301	3.8856_725.3006	0	0	0	0	0	0	0	0	0	0	0	0	0	0	0	0	0	0	0	0	0	0	0.2962	0	0.2623	0	1.6123	1.7327	2.1329	0	0	0	0	0	0	0	0	0	0	0
Negative	1.895	726.211	1.895_726.2106	0	0	0	0	0	0	0	0	1.0448	0	0	0	0.1916	0	0	0	0	0	0	0	0	0	0	0	0	0	2.4506	2.0671	1.7233	0	0	0	0	0	0	0	0	0.5744	0.336	0
Negative	7.0586	727.235	7.0586_727.2349	0.2337	0	0	0	0	1.0615	0.5259	1.2783	0.5983	1.1801	0	0	0	0	0	0	0.3023	0	0	0	0	0	0	0	0.1129	0.9826	0	0	0	1.5476	0	0	0	0	0	0	0.4882	2.4116	0.3789	3.5498
Negative	7.9319	727.239	7.9319_727.2387	0	0	0	0	0	0	0.5897	0	0	0.7248	0.3042	0	0	0	0	0.2135	0.4022	0	0.1378	0.2954	0	0	0	0	0	0	0	0	0	2.7423	0	0	0	0	0	0.1448	0.7035	2.533	0.3211	3.2602
Negative	4.1972	727.243	4.1972_727.2432	0	0	0	0	0	3.5953	0	1.0016	3.5956	2.4648	3.8031	0	0	0	3.1363	2.0622	3.2408	4.0893	2.7368	4.8946	20.278	13.1585	16.4842	18.4097	18.77	10.8517	23.9188	14.496	17.9029	19.5235	2.9076	0	0	0	0	2.0974	1.5081	5.1246	6.336	5.0598
Negative	6.7723	727.331	6.7723_727.3312	0	0	0	0	0	3.1417	1.3359	1.0511	0	0.3714	0	0	0	0	0	1.6663	1.2649	0.9119	3.2235	3.0974	0	0	0	0	0	1.674	2.1484	3.474	0.8434	1.2055	0	0	0	0	0	0.8682	0.8567	1.7774	1.7661	0.428
Negative	4.5047	729.203	4.5047_729.2032	6.0609	6.1628	10.3006	10.9798	5.5927	4.1435	4.763	4.349	5.0706	6.165	8.288	4.6878	8.4348	14.0185	4.0705	2.6512	5.1611	2.96	3.0219	2.4718	0	0.5965	0	0	0.8769	0	0	0	0	0	5.5011	6.1395	4.3046	6.3447	5.2478	2.9614	3.3001	6.9332	5.3439	3.028
Negative	4.6789	729.203	4.6789_729.2035	3.1243	2.8124	6.5787	6.5887	3.0445	0	3.1276	0	0	2.8168	4.0094	2.6442	0	6.8049	2.9329	1.7429	3.214	0	1.6962	0	0	0	0	0	0	0	0	0	0	0	0	0	0	0	0	0	0	0	0	0
Negative	4.7103	729.211	4.7103_729.2108	3.1243	0	6.5787	6.5887	3.0445	0	0	0	0	0	0	2.6442	0	6.8049	2.9329	0	0	0	0	0	0	0	0	0	0	0	0	0	0	0	0	0	0	0	0	0	0	0	0	0
Negative	6.6203	729.258	6.6203_729.258	0	0	0	0	0	1.2153	0.4997	0.5757	0.9245	1.5267	0	0	0	0	0	0.2548	0.5662	0.2481	0.5818	0.3758	0	0	0	0	0	1.7212	0.4294	0.1776	0.1764	1.9615	0	0	0.1547	0	0	0	0	1.8879	0.8355	0.6241
Negative	6.7564	729.259	6.7564_729.2591	0	0	0	0	0	1.1482	0.3998	0.5823	1.1279	1.3127	0	0	0	0	0	0	0.3623	0	0	0	0	0	0	0	0.162	1.8775	0	0	0	1.9158	0	0	0	0	0	0	0	1.8524	0	0.6532
Negative	6.7684	729.271	6.7684_729.2706	0	0	0	0	0	1.1482	0.3998	0.7384	1.1279	1.3127	0	0	0	0	0	0	0.6057	0	0	0	0	0	0	0	0	1.8775	0	0	0	1.9158	0	0	0	0	0	0	0	1.8524	1.0259	0.6532
Negative	5.2455	729.368	5.2455_729.3679	0	0	0	0	0	0.9426	0	0	0.9261	0.8555	0	0	0	0	0	0	2.2718	2.815	2.0599	1.8262	0	1.087	0	0	0	0.7097	0	1.2438	0	0	0	0	0	0	0	0.814	0.5806	1.0164	1.847	0.8546
Negative	5.0033	731.349	5.0033_731.3487	0	0	0	0.312	0	0	0	0	1.7279	2.2087	0	0	0	0	0	1.8255	3.8982	4.4308	4.5072	4.0128	0	0	0	0	0	0	0	0	0	0.4935	0	0	0	0	0	0	0	0	1.2635	0
Negative	5.3496	731.35	5.3496_731.3498	0	0	0	0	0	0	0	0	0	1.3328	0	0	0	0	0	0	0	0	1.9255	2.7194	0	0	0	0	0	0	0	0	0	0	0	0	0	0	0	0	0	0	0	0
Negative	2.19	255.122	2.19_255.1222	0	0	0	0	0	4.7297	1.6999	2.2835	3.085	3.2916	0	0	0	0	0	11.5396	7.5909	15.2506	8.4104	12.2841	0	0	0	0	0	18.4859	30.4709	32.2874	30.1868	18.7262	0	0	0	0	0	0.8794	0	1.3086	1.9229	2.2259
Negative	2.0866	255.123	2.0866_255.1226	0	0	0	0	0	1.3177	1.1238	1.0713	2.2677	2.8715	0	0	0	0	0	11.5288	0	0	0	0	0	0	0	0	0	2.0045	0	0	0	0	0	0	0	0	0	0.928	1.0498	0.9451	1.5253	2.2259
Negative	6.5836	256.19	6.5836_256.1904	2.7822	2.7335	2.9784	2.1908	1.8179	0	0	0	0	0	4.3583	1.3773	1.8912	1.9409	1.7111	0	0	0	0	0	3.2302	2.9875	2.4667	3.7631	2.9418	0	0	0	0	0	2.623	2.1427	2.3213	4.2693	4.2344	0	0	0	0	0
Negative	0.6743	257.983	0.6743_257.9833	0.9636	1.1568	1.3729	0.7488	0.8316	0	0	0	0	0	2.7939	1.5079	3.3547	4.8736	1.2909	0	0	0	0	0	2.6569	1.5356	4.2822	3.4966	2.0089	0	0	0	0	0	3.6	2.9798	1.3222	3.5862	3.5785	0	0	0	0	0.1152
Negative	0.4523	258.916	0.4523_258.9165	2.6171	2.9644	3.3881	1.5601	2.3943	0	0	0	3.1682	0	4.1144	1.029	2.9931	4.336	2.8421	0	0	0	0	0	3.406	2.1685	3.4073	3.8275	2.4658	0	0	0	2.2843	2.0929	1.3895	1.6776	1.1272	1.8077	1.1301	0	0	0	0	0
Negative	1.903	258.992	1.903_258.9916	0	0	0	0	0	0	0	0	0	0	0	0	0	0	0	0	0	0	0	0	0	0	0	0	0	0	0	0	0	0	13.1217	10.1296	0	9.5559	5.9315	0	0	5.9252	2.689	1.7169
Negative	1.2632	258.995	1.2632_258.9948	0	2.6106	2.8865	3.3968	1.897	0	0	0	0	0	0	0	0	0	0	0	0	0	0	0	0	0	0	0	0	0	0	0	0	0	0	0	0	1.3288	0	0	0	0	0	0
Negative	0.5222	259.019	0.5222_259.0195	2.9537	1.7321	2.3878	2.2163	1.9195	1.6349	0	0	2.803	0	3.5778	1.7788	5.5142	2.6728	0	0	0	0	0	0.4096	5.151	2.9082	4.9764	2.1767	2.1276	0	1.9838	2.0325	2.5316	0	4.0546	5.1127	7.1922	7.1289	6.2747	3.0508	0	0	0	0
Negative	0.603	259.024	0.603_259.0238	0	0	0	0	0.8427	1.6349	0.7476	0	2.803	0.7985	0	0	0	0	1.1435	0	1.7743	1.4005	1.3058	1.6639	0	0	0	0	1.8788	0	1.9838	2.0325	2.5316	0	0	1.0436	1.2352	2.5385	0	3.0508	1.2558	0	1.0824	1.1131
Negative	0.4571	259.079	0.4571_259.079	0	0	0	0	0.4415	0.4621	2.4574	0	0.1308	0	0	1.1117	0	0.1101	0.5133	0	0	0	0.1877	0	0	0.414	0	0.2752	0	2.5806	0.1517	0.758	0.2677	0.9106	0	0	0	0	0	0.2699	0.0834	0.1355	0	0.532
Negative	1.6013	259.129	1.6013_259.129	0	0	0	0	0	0	2.0127	1.1421	0	0	0	0	0	0	0	1.8897	0	0	0	0	0	0	0	0	0	1.4783	0	0	0	0	0	0	0	0	0	0	0	0	0	0
Negative	1.7463	259.13	1.7463_259.1297	0	0	0	0	0	0	2.6663	1.546	0	0	0	0	0	0	0	3.1057	0	0	0	0	0	0	0	0	0	1.5407	0	0	0	0	0	0	0	0	0	0	0	0	0	0
Negative	7.7104	259.189	7.7104_259.1894	0	0	0	0	0	0	0	0	0	0	0	0	0	0	0	11.1788	5.174	7.5111	6.6358	5.3984	0	0	0	0	0	0	0	0	0	0	0	0	0	0	0	0	0	0	0	0
Negative	7.0416	259.19	7.0416_259.1904	0	0	0	0	0	0	0	0	0	0	0	0	0	3.7174	2.7873	22.7256	12.0165	14.7657	17.6397	9.8181	0	0	0	0	0	0	0	0	0	0	0	0	0	0	0	0.4665	0	0.637	0	0
Negative	7.4067	259.191	7.4067_259.191	0	0	0	0	0	0	0	0	0	0	0	0	0	0	0	3.0805	0	2.1478	0	0	0	0	0	0	0	0	0	0	0	0	0	0	0	0	0	0	0	0	0	0
Negative	2.1858	261.087	2.1858_261.0869	0	0.3813	0	0.8703	0	0.6874	0	0	0	0	0	0	0	0	0.5191	0.7889	0.6745	0	0	0	0	0	0	0.429	0	14.0107	0	0	0	4.6697	0	0	0	0	0	0	1.6408	0	0	0
Negative	5.1054	731.351	5.1054_731.3506	0	0	0	0	0.3645	0	0	0	0	1.7215	0	0	0	0	0	0	3.3476	0	4.4306	3.6479	0	1.1889	0	0	0	0	0	0	0	0	0	0	0.4095	0	0	0	0	0	0	0
Negative	4.8358	733.2	4.8358_733.2002	0	0	0	0	0	1.5065	1.9776	2.4879	2.5542	2.2662	0	0	0	0	0	1.4137	2.6341	1.448	2.3348	1.259	0	0	0	0	0	1.5293	2.0502	1.8298	1.7137	3.7366	0	0	0	0	0	1.7947	3.2449	3.84	4.6388	4.5318
Negative	5.32	733.298	5.32_733.2979	0	0	0	0	0.257	0.5771	0.4416	0.3653	0.3313	0	0	0	0	0	0	0	0.2339	0	0	0	0	0	0	0	0	0	0	0	0	0	0	0	0	0	0	0	0	0	2.0075	1.4927
Negative	6.8311	733.382	6.8311_733.3821	0	0	0	0	0	0	0	0	0	0	0	0	0	0	0	2.9279	0.6737	2.3399	0.7158	1.3453	0	0	0	0	0	0	0	0	0	0	0	0	0	0	0	0	0	0.0838	0	0
Negative	5.9284	733.399	5.9284_733.3988	0	0	0	0	0	0.8956	0.9632	0.8396	0.445	0.9933	0	0	0	0	0	2.4754	1.9928	2.6342	2.2061	1.3288	0	0	0	0	0	0	0	0.4782	0	0	0	0	0	0	0	0.3915	0	0	0.7471	0
Negative	2.0783	735.213	2.0783_735.2134	1.1461	0	0	0	0.4148	0	0	0	0	0	5.4604	0	7.5208	0	6.8919	4.9563	10.8518	0	10.6286	4.8362	11.1416	12.2577	9.8201	11.6524	9.5363	13.4754	21.5528	18.8986	15.209	11.6346	0	0	0	0.5843	0	0	0	0	0	1.3809
Negative	2.6107	735.215	2.6107_735.2146	0	0	0	0	0	0	0	0	0	0	0	0	0	0	0	0	0	0	0	0	0	0	0	0	0	0	3.1191	2.6045	0	0	0	0	0	0	0	0	0	0	0	0
Negative	2.7366	735.249	2.7366_735.2494	0	0	0	0	0	0	1.8768	1.9273	0.8696	1.8156	0	0	0	0	0	0	0	0	0	0	0	0	0	0	0	0	0	0	0	0	0	0	0	0	0	0	0	0	0	0
Negative	4.62	735.391	4.62_735.3911	0	0	0	0	0	0	0	0.1818	0.1475	0	0	0	0	0	0	1.5457	1.7691	2.2778	0	1.3405	0	0.156	0	0	0	0.0959	0.1504	0.1039	0	0	0	0	0	0	0	0	0.1115	0.0519	0	0.1173
Negative	3.1923	737.188	3.1923_737.1878	0	0	0	0	0	0	0	0	0	0	0	0	0	0	0	0	0	0	0	0	0	0	0	0	0	3.1684	0	0	0	4.731	0	0	0	0	0	0	1.0197	0	0	0.2369
Negative	2.7475	737.231	2.7475_737.2313	0	0	0	0	0	0	2.1969	1.9093	1.5808	1.7043	0	0	0	0	0	0	0	0	0.4921	0	0	0	0	0	0.2381	0	0	0	0	0.5057	0	0	0	0	0	0	0	0.4439	1.0049	0
Negative	3.9537	737.268	3.9537_737.2683	0	0.3148	0	0	0	0	0	0	0	0	0	0	0.5612	0	0	3.4852	1.7358	3.1541	0	1.8538	0	0	0	0	0	0.5853	0	0	0	0	0	0	0	0	0	0	0	0	0	0
Negative	3.2191	737.321	3.2191_737.3212	0	0	0	0	0	1.0998	0.6288	0.7254	1.2172	1.2205	0	0	0	0	0	3.2831	3.9926	4.4222	1.9396	2.1868	0	0	0	0	0	0	0.576	0.4738	0.552	0	0	0	0	0	0	0	0	0	0	0
Negative	6.7791	737.36	6.7791_737.3596	0	0	0	0	0	5.4767	2.58	2.6155	1.2951	1.5178	0	0	0	0	0	3.2898	1.8944	2.8986	12.183	13.5044	0	0	0.3447	0	0	2.5501	3.6997	8.2143	2.3347	4.9095	0	0	0	0	0	1.3418	1.5622	4.8424	4.8749	1.4865
Negative	7.1872	737.361	7.1872_737.3606	0	0	0	0	0	0	0	0	1.6227	0	0	0	0	0	0	0	0	2.3609	0	0	0	0	0	0	0	0	0	0	0	0	0	0	0	0	0	1.3306	1.7024	3.1642	2.9851	1.7936
Negative	4.6338	737.41	4.6338_737.4097	0	0	0	0	0	0.1973	0.147	0	0.045	0.0983	0	0	0	0	0	2.0901	1.4589	1.4807	1.7081	1.6926	0	0	0	0	0	0.1278	0.5305	0.3438	0.2992	0	0	0	0	0.1484	0	0	0	0.3359	0	0.4071
Negative	1.1537	261.088	1.1537_261.0876	0	0	0	0	0	0	0	0	0	0	0	0	0.4155	0	0	0	0	0	0	0	0	0	0	0	0	4.2219	0	0	0	2.7056	0	0	0	0	0	0	0.8232	0.4235	0	0
Negative	2.1684	261.132	2.1684_261.1324	0	0	0	0	0	0	0	1.3147	1.9359	0	3.939	0	0	4.3155	2.7328	4.9837	2.6266	2.3913	3.1928	1.6907	0	0	0	0	0	0	0	0	0	0	0	0	0	0	0	0	0	0	0	0
Negative	0.4601	262.93	0.4601_262.9296	0	0	0	0	0	2.9399	0	2.5093	0	0	0	0	0	0	0	15.0086	0	0	2.569	2.0595	0	0	0	0	0	2.4155	0	0	0	0	0	0	0	0	0	2.5973	1.2207	0	0	2.1153
Negative	0.4377	262.945	0.4377_262.9447	1.1083	0	1.8315	0	0	0	0	0.7522	0	0.8339	1.1668	0	1.0383	0	0	0	0	0.7957	0.9138	2.0595	0	0	0	1.0701	0.81	1.844	2.1647	1.0314	1.0075	0.6772	0.8271	0	0	0	1.0109	1.8995	0	0.6386	1.0519	1.6973
Negative	7.0585	263.131	7.0585_263.1313	0	0	0	0	0	3.3061	9.3261	0	0	0	0	0	0	0	0	3.4978	5.6036	2.8395	0.4269	0	0	0	0	0	0	3.0516	2.7049	1.6032	0	0	0	0	0	0	0	16.2508	7.2479	0.5612	0	0
Negative	6.9389	263.132	6.9389_263.1315	0	0	0	0	0	0	0	5.7828	10.2692	3.3964	0	0	0	0	0	0	0	0	7.024	3.1086	0	0	0	0	0	0	0	0	0	1.4356	0	0	0	0	0	0	0	6.9138	6.9649	2.8252
Negative	7.5887	263.132	7.5887_263.1316	0	0	0	0	0	0	0	3.2473	5.9792	5.2307	0	0	0	0	0	0	0	2.0831	3.9726	4.5747	0	0	0	0	0	0	0	0	0	1.6389	0	0	0	0	0	0	0	5.2137	3.8687	3.3371
Negative	7.7371	263.132	7.7371_263.132	0	0	0	0	0	1.8579	4.9037	0.4359	0	0	0	0	0	0	0	2.745	3.9652	0	0	0	0	0	0	0	0	1.6605	1.822	0	0	0	0	0	0	0	0	15.6713	7.9079	0	0	0
Negative	0.4517	264.932	0.4517_264.9322	0	0	0	0.4232	0.5081	0.7305	0.5824	0	0	0	0	0.5727	0.8398	0.3304	1.0756	0	0	0	0.6137	0.6522	2.2674	4.0783	0.848	2.0088	4.2239	0	0	0	0	0.4877	3.6699	7.4205	10.0474	5.8781	10.9834	0	0.5409	0	0.3254	0.6019
Negative	0.8661	265.094	0.8661_265.0944	0	0	0	0	0	0	0.8252	1.0289	0	0.5838	0	3.5869	0	1.2483	1.269	0.9301	0	0.986	0.5417	1.2913	0	0.859	0	0	0.6311	0.5282	0.8245	0.6341	0.8351	1.5436	1.3587	0.775	1.0377	0.784	0	0.609	0.6149	0.5958	0	0.593
Negative	6.2561	265.147	6.2561_265.1465	0	0	0	0	0	17.643	0	0	0	0	0	0	0	0	0	0	0	0	0	0	0	0	0	0	0	0	0	0	0	0	0	0	0	0	0	18.5906	0	0	0	0
Negative	6.3854	265.147	6.3854_265.1467	0	0	0	0	0	10.9786	0	0	0	0	0	0	0	0	0	2.2115	0	0	0	0	0	0	0	0	0	0	0.5547	0	0	0	0	0	0	0	0	15.8288	0	0	0	0
Negative	6.7018	265.147	6.7018_265.1467	0	0	0	0	0	0	0	0	0	0	0	0	0	0	0	2.7705	0	0	0	0	0	0	0	0	0	17.4185	0	0	0	0	0	0	0	0	0	0	0	0	0	0
Negative	6.5406	265.147	6.5406_265.1468	0	0	0	0	0	11.7593	0	0	0	0	0	0	0	0	0	2.7977	0	0	0	0	0	0	0	0	0	9.4167	0	0	0	0	0	0	0	0	0	0	0	0	0	0
Negative	6.1142	265.147	6.1142_265.1471	0	0	0	0	0	24.3815	0	0	0	0	0	0	0	0	0	0	0	0	0	0	0	0	0	0	0	0	0	0	0	0	0	0	0	0	0	23.1217	0	0	0	0
Negative	5.3939	265.147	5.3939_265.1473	0	0	0	0	0	0	5.0804	0	0	0	0	0	0	0	0	0	4.5105	0	0	0	0	0	0	0	0	0	0	0.5647	0	0	0	0	0	0	0	0	3.3412	0	0	0
Negative	3.1374	739.158	3.1374_739.1575	0	0	0	0	0	0	0	0	0	0	1.3484	0	0	1.4589	3.0951	0	0	0	0	0	4.3647	1.8595	3.6343	1.7584	4.8633	0	0	0	0	0	0	0.2389	0	0	0	0.1371	0	0	0	0
Negative	2.6192	739.189	2.6192_739.1888	3.0893	2.9625	4.3202	4.47	2.4854	0	0	0	0	0	0	2.0292	0	0	0	0	0	0	0	0	0	1.4961	1.1163	0.8192	0	0	0	0	0	0	0	0	0	0	0	0	0	0	0	0
Negative	3.4474	739.199	3.4474_739.1995	3.7411	3.0319	2.044	2.5822	2.2634	2.4759	0	0	0	0	0.7001	0.6466	0.7647	0.3333	0.5409	0.2488	0	0	0	0	0	0	0	0	0	0.2054	0	0	0	0	0	0	0	0	0	0.3301	0.3538	0.4217	0.2313	0.2045
Negative	2.6279	739.208	2.6279_739.2085	3.0893	2.9625	4.3202	4.47	2.4854	0	0	0	0	0	0	2.0292	0	0	0	0	0	0	0	0	1.1862	1.4961	1.1163	0.8192	0.918	0	0	0	0	0	0	0	0	0	0	0	0	0	0	0
Negative	2.0888	739.209	2.0888_739.2087	6.0336	4.6597	4.3396	5.7414	6.421	4.2161	0	0	3.5761	2.3721	1.1379	1.1744	0.9063	1.1207	0.7204	0	0	0	0	0	1.4409	1.4589	0.6058	0	0	0	0	0	0	0	36.4178	36.4158	33.994	35.4977	41.4187	15.4483	19.1799	19.8069	16.8595	19.9948
Negative	3.0508	739.286	3.0508_739.2861	0	0	0	0	0	0	0	0	0	0	0	0	0	0	0	0	0	0	0	0	0	0	0	0	0	1.5703	0	0	0	0	0	0	0	0	0	0	0	0	2.0889	0
Negative	3.2113	739.293	3.2113_739.293	0	0	0	0	0	0	0	0	0	0	0.4283	0	0	0	0	0	0	0	0	0	0	0	0	0	0	2.824	0	0	0	4.2823	0	0	0	0	0	0	0	0	0	0
Negative	3.1096	741.167	3.1096_741.1674	1.5112	0	0.274	0.6459	0.3118	0	0.1107	0	0	0	32.1213	0	0	19.7492	42.9507	6.9595	0	27.9493	11.2247	16.7631	75.0481	38.9583	77.0547	34.0634	96.5423	13.5766	28.4534	30.2608	43.9715	11.7443	0	0	0	0	1.6877	0	0	0	0	0
Negative	2.7929	741.17	2.7929_741.1696	0	0	0	0	0	0	0	0	0	0	0	0	0	0	0	0	0.1145	2.8408	0.7293	1.745	0	0	0	0	0	0.8046	2.8829	2.6883	4.604	1.0257	0	0	0	0	0	0	0	0	0	0
Negative	2.9561	741.176	2.9561_741.1762	0	0	0	0	0	0	0.1452	0	0	0	0	0	0	0	0	0	0	2.4923	0.9152	1.9067	0	0	0	0	0	1.5932	3.302	2.8365	4.0292	0.9558	0	0	0	0	0	0	0	0	0	0
Negative	2.8649	741.185	2.8649_741.1847	0	0	0	0	0	0	0	0	0	0	0	0	0	0	0	0	0	2.4643	0	1.7866	0	0	0	0	0	1.2129	2.4618	0	4.2226	0	0	0	0	0	0	0	0	0.2166	0	0
Negative	1.9579	741.187	1.9579_741.1867	0	0	0	0	0	0	0.6494	0.4616	0	0	0	0	0	0	0	0.7108	1.0035	2.8313	1.2289	3.176	0	0	0	0	0	0	0	0	0	0	0	0	0	0	0	0	0	0	0	0
Negative	2.7445	743.207	2.7445_743.2065	0	0	0	0	0	0	0.4502	0	0.6961	0.653	0	0	0	0	0	3.2263	1.7824	2.0149	1.6568	1.6619	0	3.0382	0	3.38	0	0	0	0	3.6865	1.8601	0	0	0	0	0	0.759	0.4368	1.4547	1.5895	0.9748
Negative	4.0977	743.239	4.0977_743.2394	0	0	0	0	0	2.2526	0.89	1.312	2.3611	1.9215	0	0	0	0	0	3.3864	3.0132	1.9532	2.658	2.2601	0	0	0	0	0	3.7746	3.8838	2.7201	2.5964	6.1466	0	0	0	0	0	0	1.2452	3.1047	2.7088	2.3055
Negative	3.6356	743.351	3.6356_743.3511	0	0	0	0	0	0.1014	0	0	0	0	0	0	0	0	0	0	0	0	0	0.1432	0	0	0	0.1879	0	0	5.6212	3.724	5.3606	0	0	0	0.1396	0	0	0	0	0	0.0575	0
Negative	0.6896	745.143	0.6896_745.1431	0	3.3803	4.0343	3.7171	0	0	0	0	0	0	2.8598	0	1.2224	1.0518	0	0	0	0	0	0	5.0928	0	1.8182	2.9895	2.7161	0	0	0	0	0	2.6785	0	8.4719	5.4997	4.6557	0	0	0	0	0
Negative	5.5452	265.148	5.5452_265.148	0	0	0	0	0	0	3.0459	0	0	0	0	0	0	0	0	0	2.5986	0	0	0	0	0	0	0	0	0	2.8093	0	0	0	0	0	0	0	0	0.3412	0	0	0	0
Negative	5.7044	265.149	5.7044_265.149	0	0	0	0	0	0	1.7759	0	0	0	0	0	0	0	0	0	3.4585	0	0	0	0	0	0	0	0	0	4.0761	0	0	0	0	0	0	0	0	0	0	0	0	0
Negative	5.825	265.151	5.825_265.1506	0	0	0	0	0	0	0	0	0	0	0	0	0	0	0	0	2.2505	0	0	0	0	0	0	0	0	0	4.1437	0	0	0	0	0	0	0	0	0	0	0	0	0
Negative	1.9256	267.063	1.9256_267.0631	5.4081	0	0	0	0	0	0	0	0.7791	0	0	0	2.998	1.0648	1.4825	0	3.6308	1.0784	0	0	0	0	0	0	0	0	0	0	0	0	5.3515	5.2628	3.9331	0	0	0	0.0681	0	0	0.9435
Negative	2.6186	267.074	2.6186_267.0735	10.5434	0	9.2648	12.1519	0	1.9765	0	2.822	2.0115	1.7446	12.686	11.0388	9.6591	12.5327	13.1624	0	2.1856	2.3668	3.4275	2.5144	0	0	0	0	0	0	0	0	0	2.5446	0	0	0	0	12.9405	0	3.7185	2.4137	4.033	4.0592
Negative	2.4715	267.071	2.4715_267.0713	11.0705	0	0	12.0685	0	0	0	0	0	0	0	9.2772	0	0	8.0337	0	0	0	0	0.2025	0	0	0	0	0	0	0	0	0	0	0	7.5617	0	0	8.2493	0	0	0	0	0
Negative	2.2123	267.072	2.2123_267.0719	13.0223	15.9714	0	16.584	17.8775	2.4646	1.1871	1.3807	1.907	1.5718	0	7.1438	0	0	0	0	0	0	0	0	6.2957	6.4648	6.3743	0	6.6513	0.6036	0	0	0	0.4745	13.8916	0	0	16.185	19.6877	2.7215	3.2476	2.6255	3.3213	2.0862
Negative	0.507	267.073	0.507_267.0726	5.0908	2.841	3.6458	2.7458	3.65	0.5135	0.6495	0.8502	1.0206	0	2.0423	3.7145	2.5222	2.46	2.5487	0	0	0.7168	0	0	2.0667	2.4451	3.0871	3.5034	2.3841	0	0	0.4999	0	0.754	2.8825	2.2233	4.2967	2.4711	4.4731	1.0094	3.7009	0.7419	0.9816	0.9361
Negative	2.7548	267.089	2.7548_267.089	0	0	0	0	0	0	7.485	6.1663	4.3285	4.3377	0	0	0	0	10.0334	19.6699	8.44	9.6743	5.827	5.9539	5.4605	6.9953	0	6.3135	6.4339	3.7478	5.6319	6.6242	9.5159	4.0489	0	0	0	0	5.18	5.0146	9.4677	6.2768	6.476	5.6989
Negative	0.4744	267.963	0.4744_267.9632	2.1538	2.9119	4.3352	2.1997	1.8399	0	0	0	0.3632	0	2.231	0.4901	0.8779	0.8445	1.3539	0	0	0	0	0	1.5252	2.507	1.5996	2.1019	2.5047	0	0	0	0	0	0.5982	1.1236	0.9842	1.9231	0.9249	0	0	0	0	0
Negative	3.1113	269.103	3.1113_269.1033	1.6571	1.3334	1.1576	1.5913	1.2985	0	0	0	0	0	3.489	2.2878	2.6219	4.0744	2.5821	0	0	0	0	0	2.0645	2.7854	3.4637	1.9427	1.6022	0	0	0	0	0	2.1209	1.3851	1.8559	1.3708	0.9332	0	0	0	0	0
Negative	2.886	269.105	2.886_269.1054	0	0	0	0	0	0	1.2932	1.8102	1.3053	1.3609	0	0	0	0	0	0	0	0	1.9985	3.8131	0	0	0	0	0	0	0	0	7.4398	5.1743	0	0	0	0	0	0	1.4614	1.5001	2.3456	3.3839
Negative	3.0134	269.106	3.0134_269.1055	0	0	0	0	0	7.914	9.713	9.4528	4.729	3.0208	0	4.7575	0	4.0744	6.255	23.3515	19.0582	17.4208	8.8922	12.3257	0	5.5837	0	0	3.4345	11.9266	14.7559	15.4608	18.5962	17.0978	0	0	0	0	0	5.5691	5.7927	5.2704	5.6475	8.7714
Negative	7.2872	270.207	7.2872_270.2074	3.9425	4.4772	3.7014	4.2815	3.3375	0	0	0	0	0	8.5631	4.0334	2.0981	6.2351	4.9073	0	0	0.1815	0	0	5.6703	7.7681	4.4296	5.1447	6.4933	0	0	0	0	0	4.4265	4.1983	5.2389	8.0367	6.2344	0	0	0	0	0
Negative	8.0662	271.226	8.0662_271.2265	0	0	0	0	0	1.3371	0.2754	0	0.5514	0.7729	0	0	0	0	0	0	0	0.4403	0.2923	0.2911	0	0	0	0	0	0.2091	3.2733	2.5179	2.5551	0.4429	0	0	0	0	0	0	0.2712	0.9586	0.5355	0
Negative	0.4253	272.956	0.4253_272.956	49.8633	67.2103	73.5157	57.9826	57.3172	38.018	57.4965	66.5478	59.1137	38.1161	49.3732	49.432	40.7011	55.9379	54.0667	50.228	50.387	36.6069	58.9008	53.971	38.0729	46.3996	35.5033	56.8136	48.008	37.5016	51.1726	43.4352	43.8813	29.4609	41.222	54.2118	57.0329	44.7682	58.3348	46.8564	46.136	34.5549	48.8049	66.6021
Negative	0.6968	745.17	0.6968_745.1698	6.9631	3.3803	3.0059	0	7.2973	0	2.2161	0	1.3209	1.435	2.8598	7.0114	1.2224	1.0518	7.5851	1.6451	0	1.2867	1.1847	1.5404	1.2464	5.4446	1.8182	2.9895	2.7161	0	1.2327	0	2.0572	0	4.7687	7.0329	8.4719	5.4997	4.6557	3.027	3.4881	2.1268	1.253	1.4538
Negative	4.9846	745.327	4.9846_745.3267	0	0	0	0.1884	0	0.2784	0	0	0.3721	0.5244	0	0	0	0	0	0.6985	2.8098	2.8592	2.9821	1.8728	0	0	0	0	0	0	0	0	0	0	0	0	0	0	0	0	0	0	0	0
Negative	2.5969	747.178	2.5969_747.1782	0.2602	0	0	0	0	0	0.0958	0.3338	0.319	0	0	0	0	0	0	0.0753	0	0.7774	2.6319	3.1995	0	0	0	0	0.4448	0	1.2702	0	0	0	0	0	0	0	0	0.5871	0.3352	0	0	0.3846
Negative	4.3358	747.346	4.3358_747.3459	0	0	0	0	0	0	0	0	0	0	0	0	0	0	0	0	2.3283	2.1398	2.9455	2.0411	0	0	0	0	0	0	0	0	0	0	0	0	0	0	0	0	0	0	0	0
Negative	4.1363	747.348	4.1363_747.3484	0	0	0	0	0	0	0	0	0	0	0	0	0	0	0	0	0	1.1276	1.7193	1.9535	0	0	0	0	0	0	0	0	0	0	0	0	0	0	0	0	0	0	0	0
Negative	5.5252	749.362	5.5252_749.3616	0.3606	0.354	0	0	0	3.0898	2.858	1.8246	0.8816	1.892	0	3.7998	0	0.6242	0	0	0	0	0	0	0.5771	0.4541	0	0	0.2842	0.8711	0.7161	0.9506	0	0	0.9205	0	0.9713	0	0.565	0	0.2559	0	0	0
Negative	2.6256	751.192	2.6256_751.1921	0	0	0	0	0	0	0.9102	1.6341	0.9852	1.7829	0	0	0	0	0	0	0.4223	0	0.7096	0.3868	7.4876	11.8981	3.6098	7.7686	8.7692	6.3072	2.1304	4.2997	11.3563	17.4642	0	0	0	0	0	3.1504	5.753	6.8212	15.6135	17.0038
Negative	3.2156	751.198	3.2156_751.198	0	0	0	0	0	0.3484	0	0.3465	0	0	0	0	0	0	0	0	0.3303	0.3322	0	0	0	2.6591	0	0	0	2.1403	0.3048	0	0	2.4416	0	0	0	0	0	0.9047	3.6518	0.3602	0.9509	0.7295
Negative	3.0415	751.296	3.0415_751.2963	0	0.5434	0	0	0.4704	0	0	0	0	0	0	0	0.1817	0	0	0	0	0	0	0	0	0.4522	0	0	0	0	0	0	0	0	2.7604	0	0	0	1.3184	0	0	0	2.3421	0
Negative	6.4601	751.338	6.4601_751.3385	0	0	0	0	0	0.6476	0.6154	0	0.3328	0.3666	0	0	0	0	0	0	0.7062	0.8908	2.122	4.5407	0	0	0	0	0	0.4492	0.7918	1.1052	0.3549	0.689	0	0	0	0	0	0.522	0	1.228	1.1281	0.4403
Negative	4.8398	751.377	4.8398_751.3768	0	0	0	0	0	0	14.9126	7.3084	0	5.9267	0	4.7112	0	0	2.7607	15.3937	6.2095	10.1242	0	5.3624	0	0	0	0	0	4.2137	0	0	0	0	0	0	0	0	0	0	0	0	0	0
Negative	5.2721	751.381	5.2721_751.381	0	0	0	0	0	0	0	0	0	0	0	0	0	0	0	0	0	0	0	5.4219	0	0	0	0	0	3.5609	5.5668	4.1716	4.6191	0	0	0	0	0	0	1.6726	2.1997	3.5933	4.4666	5.8465
Negative	2.4854	753.198	2.4854_753.1985	0	0	0	0	0	0	0	3.6197	1.9932	0	0	0	0	0	0	0	1.7629	0	0	0	0	0	0	0	0	0	0	0	0	0	0	0	0	0	0	0	1.1237	0	0	1.1718
Negative	2.6011	753.207	2.6011_753.2074	0	0	0	0	0	6.9424	12.345	11.9839	6.4174	10.007	0	0	0	0	0	4.4378	3.8639	2.8801	2.8268	0	0	0	0	0	0	3.2589	0	0	0	4.1993	0	0	0	0	0	0	0	0	5.2237	5.5092
Negative	2.7886	753.209	2.7886_753.2092	8.879	10.5046	5.4977	9.88	12.2523	0	5.6629	6.9548	6.508	5.3115	5.2133	15.4258	4.3715	4.9872	8.4032	0	0	0	0	4.7167	0	6.9011	2.1748	4.7973	6.2777	0	0	0	0	0	0	0	0	0	0	0	0	0	0	0
Negative	2.3901	753.211	2.3901_753.2114	0	0	0	0	0	0	2.8482	0	1.7758	1.8661	0	0	0	0	0	0	0	0	0	0	0	0	0	0	0	0	0	0	0	0	0	0	0	0	0	0	0	0	1.7109	2.6692
Negative	2.3462	273.006	2.3462_273.0062	3.1437	0	4.4662	3.2915	0	1.1366	1.1687	0	0.5823	0	0	0	0	0	0	0	0	0	0	0.164	0	0	0	0	0	0	0	0	0	0	1.5329	2.1268	0	1.4763	1.2713	0	0	2.1187	0	0
Negative	2.2423	273.007	2.2423_273.007	8.6709	16.0868	18.4143	19.2316	12.722	3.4718	1.6327	1.4618	0.9825	1.9281	0	0	0	0	0	0	0	0	0	0.4917	0	0	0	0	0	0	0	0	0	0	3.9616	4.4283	1.0892	0	1.4126	0	0	2.4207	0	0.6106
Negative	2.1326	273.007	2.1326_273.0071	13.0412	24.418	26.147	22.3004	16.7518	3.4718	2.5007	2.612	1.1912	3.2272	0	0	0	0	0	0	0	0	0	0.8655	0	0	0	0	0	0	0	0	0	0	5.0619	6.7069	2.9054	0	0	0	0	3.3461	1.1421	1.2735
Negative	3.5168	273.008	3.5168_273.0076	0	0	0	0	0	0.483	0	5.5803	1.1039	0	0	0	0	0	0	0	0	0.5246	0	2.0186	0	0	0	0	0	0	0	0	0	0	0	0	0	0	0	0	0	0.5588	0	1.1749
Negative	3.6666	273.009	3.6666_273.0086	0	0	0	0	0	0.5279	0.4589	4.4816	0.9158	0	0	0	0	0	0	0	0	0	0	1.2775	0	0	0	0	0	0	0	0	0	0	0	0	0	0	0	0	0	0	0	0
Negative	8.1848	273.204	8.1848_273.2042	0	0	0	0	0	0	0	0	0	0	0	0	0	0.8539	0	6.8613	3.9592	5.1179	3.841	2.8176	0	0	0	0	0	0	0	0	0	0	0	0	0	0	0	0	0	0.3727	0	0
Negative	7.9977	273.207	7.9977_273.2067	0	0	0	0	0	0	0	0	0	0	0	0	0.9705	1.2515	0.9799	6.2637	3.8758	5.0924	3.6694	2.8494	0	0	0	0	0	0	0	0	0	0	0	0	0	0	0	0	0	0	0	0
Negative	0.5354	274.025	0.5354_274.0246	4.8834	1.6461	0.927	3.7493	4.0787	0	0	0	2.1828	0	4.9642	4.6077	5.5545	2.9474	8.0574	12.0028	0	0	3.1929	0	8.5625	6.9318	13.1831	20.0226	4.7067	0	0	2.06	0	0	4.8228	2.6485	2.0052	0.9594	3.0284	0	2.5859	0	0	0
Negative	0.6377	274.026	0.6377_274.0258	0.8031	0	0	0.7769	0	1.7485	1.3453	1.4035	3.7066	1.4868	1.1822	1.1185	1.2505	0.6242	1.9237	17.9031	6.2049	4.7217	6.5661	5.3617	0	0	2.675	4.7578	0	7.5978	2.1692	2.9592	1.3661	7.5787	0	0.464	0	0.5	0.7063	1.6996	4.711	4.8066	0.6826	2.1541
Negative	0.5349	275.02	0.5349_275.0197	20.5194	7.6172	4.8828	19.657	15.735	0	0	0	9.038	0	20.3211	18.7177	24.12	12.0584	31.3389	43.3087	4.33	10.2379	0	0	37.4791	29.4034	49.442	75.9207	22.7529	0	0	7.8688	3.6014	0	18.0138	11.7769	9.1123	4.6636	10.3596	3.7824	9.2571	0	0	0
Negative	0.6358	275.021	0.6358_275.0206	0	1.428	1.5383	3.1481	0	7.1151	5.5413	5.1367	14.1462	6.3223	5.5533	0	5.0197	2.638	7.6994	57.9428	24.7644	19.2511	26.1732	20.9339	10.4853	7.1939	12.1131	18.4596	5.3454	29.8335	9.4556	11.72	5.3361	29.4282	0	1.6984	0.5486	0	3.861	6.7242	18.5169	17.8061	2.3131	7.3837
Negative	0.5729	275.045	0.5729_275.0448	0	0	0	3.2384	4.6704	0	0	0	0	0	0	0	0	0	0	3.2436	0	0	0	0	0	0	17.3684	0	0	0	6.8869	0	0	1.9783	0	0	0	0	0	0	0	0	0	0
Negative	1.7117	275.149	1.7117_275.1491	0	0	0	0	0	0	0	0	0	0	0	0	0	0	0	1.433	2.2549	0.7457	1.8935	0.2781	7.5814	0	0	3.15	0	0	0	0	0	0.2482	0	0	0	0	0	0	6.2965	0	0	6.9299
Negative	0.4411	276.96	0.4411_276.9598	1.6872	2.5278	0	2.2901	2.1121	1.4817	2.4122	2.6161	2.3271	1.6411	0	0	0	2.6776	2.0157	1.7962	2.1039	1.6262	2.6575	2.2302	1.3157	1.7244	0	0	1.8249	1.4809	2.197	1.8633	1.8071	1.216	0	0	0	0	1.3184	1.6964	1.8134	1.3169	1.8753	2.7502
Negative	2.2979	277.122	2.2979_277.1217	0	0	0	0	0	1.0708	1.0061	0	1.0011	0.9651	0	0	0	0	2.6129	4.4722	3.2278	2.6992	1.9509	1.6525	0	2.845	0	0	0	2.0802	1.7136	2.209	0	2.5399	2.7965	3.4716	0	0	0	0	3.6572	1.3834	2.9613	2.5222
Negative	8.4958	277.218	8.4958_277.2181	0	0	0	0	0	0	0	4.4493	0	0.6091	0	0	0	0	0	0	0	3.7793	0.3546	0	0	0	0	0	0	0	0	0	0.4828	0	0	0	0	0	0	0	0	1.339	0	0
Negative	2.4743	753.212	2.4743_753.2115	0	0	0	0	0	0	4.51	3.6197	1.9932	2.6792	0	0	0	0	0	0	0	0	0	0	0	0	0	0	0	0	0	0	0	0	0	0	0	0	0	0	0.8869	0	0	1.1718
Negative	2.7673	753.223	2.7673_753.223	0	10.5046	0	0	0	1.251	0	0	0	0	0	0	0	3.3328	0	0	0	0	0	4.7167	0	0	0	4.7973	0	0	0	0	1.9914	3.2446	0	0	0	0	0	0	0	0	0	0
Negative	2.7373	753.247	2.7373_753.2467	0	0	0	0	0	0	0	0	0	0	0	0	0	0	0	0	3.2824	2.8681	2.8659	2.1277	0	0	0	0	0	0	0	0	0	1.9052	0	0	0	0	0	0	0	0	0	0
Negative	4.5154	753.255	4.5154_753.2546	0	0	0	0	0	0	0	0	0	0	0	0	0	0	0	0	1.8733	0	1.8784	1.6276	0	0	0	0	0	0	0	0	0	0	0	0	0	0	0	0	0	0	0	0
Negative	4.7097	753.271	4.7097_753.2707	0	0	0	0	0.1185	0	0	0.2867	0.3241	0.5728	0	0.2475	0	0	0	1.5955	1.7088	1.8495	2.0745	1.9501	0	0	0	0	0	0	0	0	0	0	0	0	0	0	0	0.4785	0.5126	1.1318	0	0.9058
Negative	3.0397	753.283	3.0397_753.2832	0	1.2668	0	0	0	0	0	0	0	0	2.9191	0	2.9624	3.7339	0	0	2.5305	0	0	1.5465	1.0188	0.9934	1.6347	1.6126	0.7765	0	0	0	0	0	0.9803	1.1242	1.0434	1.6974	0.9417	0	0	0	0	0
Negative	6.6396	753.389	6.6396_753.3893	0	0	0	0	0	0	0	0	0	0	0	0	0	0	0	0	0	0	0.2841	0	0	0	0	0	0	0	0.7223	0.7732	0.595	0	0	0	0	0	0	2.3271	4.6034	0.7655	2.8031	1.4005
Negative	5.4217	753.389	5.4217_753.3895	0	0	0	0	0	2.7447	1.3536	1.8867	0	0	0	0	0	0	0	2.1751	1.6358	2.1181	2.2959	3.7164	0	0	0	0	0	0.5413	1.5558	1.458	1.1919	0	0	0	0	0	0	0	0	0	0	0
Negative	4.7791	753.39	4.7791_753.3896	0	0	0	0	0	0	3.9765	0	0	0	0	0	0	0	0	7.0844	0	0	0	0	0	0	0	0	0	2.1986	0	0	0	0	0	0	0	0	0	0	0	0	0	0
Negative	5.551	753.39	5.551_753.3904	0	0	0	0	0	0	1.2694	0	0	0	0	0	0	0	0	3.0175	1.2293	0	1.8774	2.8258	0	0	0	0	0	0	0	0	0	0	0	0	0	0	0	0	0	0	0	0
Negative	5.0519	753.391	5.0519_753.3909	0	2.6431	0	0	3.2133	11.2961	6.3306	7.203	8.675	8.3438	0	0	0	0	3.0818	10.736	8.2321	15.6038	7.314	10.9517	0	0	0	0	0	4.2207	5.5754	4.8167	0	3.6505	0	0	0	0	0	2.1371	3.9659	4.3648	5.678	6.0335
Negative	5.1829	753.391	5.1829_753.3912	0	0	0	0	0	0	0	0	2.2076	0	0	0	0	0	3.0818	3.5545	2.9054	5.0348	2.748	3.8416	0	0	0	0	0	2.1525	0	0	0	2.5309	0	0	0	0	0	0	0	2.9532	3.6732	6.0121
Negative	3.63	755.113	3.63_755.1131	2.6859	2.4404	2.9859	3.4512	3.0556	0	0	0	0	0	3.3672	2.5865	3.5043	3.6633	0	0	0	0	0	0	0	0	0	1.7013	0	0	0	0	0.1156	0	3.0627	2.3025	2.2008	2.6697	4.1351	0	0	0	0	0
Negative	3.6349	755.139	3.6349_755.1392	3.025	2.7287	2.9859	3.4512	3.0556	0	0	0	1.9781	0	3.3672	2.1343	3.5043	3.6633	4.5715	0	0	1.8432	0	0.1287	3.5525	2.0763	5.1614	4.3253	0	0	0	0	0.1156	0	0	2.3025	2.2008	1.9139	4.1351	0	0	0	0	0
Negative	1.98	755.169	1.98_755.1695	0	0	5.2148	0	0	0	0	0	1.0201	0	3.1477	0	0	0	0	0	0	0.807	0.8931	0	0	0	0	0	0	0	0	0	0	0	0	0	0	0	0	0	0	0	0	0
Negative	2.0611	755.175	2.0611_755.1751	0	0	4.3246	0	2.9975	0	0	0	0	0	6.1879	7.3064	0	0	0	2.1296	0	0	0	0.5323	2.2626	0	0	0	0	0	0	0	0	0.7504	36.0659	0	0	0	0	0	0	0	1.0184	0
Negative	8.6082	277.218	8.6082_277.2184	0	0	0	0	0	0	0	2.8074	0	0	0	0	0	0	0	0	0	3.0258	0	0	0	0	0	0	0	0	0	0	0	0	0	0	0	0	0	0	0	1.1274	0	0
Negative	0.4772	278.914	0.4772_278.9136	0	0	0	0	0	1.5463	0.9052	1.1766	0.9307	1.9029	0	0	0	0	0	5.2926	2.0357	1.3358	2.0394	2.5413	0	0	0	0	0	0.1577	0.5019	0.605	0.5548	0.2979	0	0	0	0	0	0.5786	1.3694	0.585	0.4761	2.6612
Negative	2.2476	279.055	2.2476_279.055	0	0	0	0	0	3.9863	5.4826	5.1713	3.1416	3.1595	0	0	0	0	0	1.236	3.6823	7.5678	3.4316	7.8439	0	0	0	0	0	0	0	0	0	0	0	0	0	0	0	0	0	0	0	0
Negative	1.2686	279.107	1.2686_279.107	0	0	0	0	0	0	0	0	0	0	0	0	0	0	0	0	1.612	0	1.14	1.1407	0	0	0	0	0	1.4895	1.0832	1.5346	1.4908	2.0719	0	0	0	0	0	1.1017	1.4239	1.1673	1.4438	0
Negative	8.3363	279.126	8.3363_279.1262	0	0	0	0	0	4.2559	0.4182	0	0	0	0	0	0	0	0	2.8368	0	0	0	0	0	0	0	0	0	0	0	0	0	0	0	0	0	0	0	1.5385	0	0	0	0
Negative	8.1423	279.13	8.1423_279.1297	0	0	0	0	0	0	0	0	1.3473	0.2657	0	0	0	0	0	0	0	0	1.1321	0	0	0	0	0	0	0	0	0	1.7629	0	0	0	0	0	0	0	0	0	2.0744	0
Negative	1.6181	279.134	1.6181_279.134	0	0	0	0	0	0	4.2064	2.4168	0.8518	0	0	0	0	0	2.7512	2.8469	10.4299	2.3805	13.8236	2.4234	0	0	0	0	0	0	0	0	0	0	0	0	0	0	0	0	0	0	0	0
Negative	8.2056	279.142	8.2056_279.1421	0	0	0	0	0	0	0	3.5009	0	0	0	0	0	0	0	0	0	1.9873	0	0	0	0	0	0	0	0	0	0.9632	0	0	0	0	0	0	0	0	0	4.485	0	0
Negative	8.5699	279.163	8.5699_279.1628	0	0	0	0	0	0	2.0924	0	0	1.681	0	0	0	0	0	0	2.1366	0	0	3.6395	0	0	0	0	0	0	2.3039	0	0	4.2481	0	0	0	0	0	0	3.0045	0	0	2.2206
Negative	8.2561	279.163	8.2561_279.1635	0	0	0	0	0	0	0	0	0	2.1872	0	0	0	0	0	0	0	1.7282	0	0	0	0	0	0	0	0	0	0	0	0	0	0	0	0	0	0	0	1.9665	0	0
Negative	8.4131	279.164	8.4131_279.1637	0	0	0	0	0	0	0.7353	0	0	4.8499	0	0	0	0	0	0	0	0	0	0	0	0	0	0	0	0	0	0	0	1.8948	0	0	0	0	0	0	2.9322	0.3193	0	4.1435
Negative	0.4545	280.905	0.4545_280.9053	3.448	2.5546	3.4623	3.4835	5.0434	0	0	0	0	0	4.471	3.0154	5.1499	3.1952	4.5694	0	0	0	0	0	9.1507	10.5299	5.3375	9.0079	11.2236	1.4687	0	0	0	0	6.8241	10.5276	12.8645	10.9245	11.6571	0	0	0	0	0
Negative	4.9141	281.056	4.9141_281.0564	0	0	0	0	0	1.545	2.0813	1.8762	1.8066	0.903	0	0	0	0	0	0.7213	2.026	1.3716	1.5797	0.7741	0	0	0	0	0	0.9409	1.2893	0.911	1.1085	1.1295	0	0	0	0	0	3.8155	2.2537	2.3138	2.5863	1.1798
Negative	2.5664	281.068	2.5664_281.0676	0	0	0	0	0	0.5505	1.3006	1.1346	0	0	0	0	0	0	0	0	0	1.8679	0	1.3071	0	0	0	0	0	0	0	0	0	0	0	0	0	0	0	0	0	0	0	0
Negative	3.0248	281.069	3.0248_281.0693	0	0	0	0	0	0	2.2772	2.3543	0	0	0	1.5926	0	0	0	2.6675	0	0	0	0	0	0	0	0	0	0	0	0	0	0	0	0	0	0	0	0	0	0	0	0
Negative	2.8979	281.071	2.8979_281.0707	0	0	0	0	0	0	0	0	0	0	0	1.7576	0	0	0	2.2112	0	3.0747	0	2.0253	0	0	0	0	0	0	0	0	0	0	0	0	0	0	0	0	0	0	0	0
Negative	3.625	755.179	3.625_755.1786	0	0	0	0	0	0	0	0	0	0	0	0	0	0	0	0	0	0	0	0	6.5449	0	6.403	4.3253	8.036	0	0	0	0	0	0	0	0	0	0	0	0	0	0	0
Negative	3.4896	755.181	3.4896_755.1812	0	0	0	0	0	0	0	0	0	0	28.3861	0	0	26.4911	39.707	6.9392	0	13.9171	24.1172	10.1577	47.985	32.3097	40.6206	31.7043	67.9886	9.3687	17.1008	15.8765	18.6305	7.3143	0	0	0	0	1.3184	0	0	0	0.9139	2.0025
Negative	3.1791	755.182	3.1791_755.1821	61.886	50.316	35.4181	59.3084	59.8265	19.7734	20.5086	23.2111	25.0853	10.4809	0	8.497	6.1645	0	0	0	4.7416	2.1102	3.8657	1.6823	0	0	0	0	0	1.4747	2.1444	1.7836	3.276	0	0	0.5974	0	1.4986	0	0	0	2.1819	0	0
Negative	3.3625	755.184	3.3625_755.1836	0	0	0	0	0	0	0	0	0	0	0	0	0	0	0	0	0	4.0182	7.7373	3.8437	0	0	0	0	0	3.255	3.4288	3.5695	3.9412	1.4964	0	0	0	0	0	0	0	0	0	0
Negative	2.0556	755.203	2.0556_755.2033	8.3952	7.3397	0	6.3083	10.5706	4.7569	0	0	0	0	4.3823	8.0635	7.173	6.3417	7.2949	3.3526	3.5277	5.4265	3.6763	4.8804	16.2027	12.944	9.1878	6.701	15.9548	2.9274	3.9545	4.2842	4.6195	0	36.0659	37.551	35.2238	29.1291	39.6589	15.2899	16.0054	17.8436	16.7775	14.7075
Negative	4.7762	755.275	4.7762_755.2746	0.259	0	0	0	0	0.6727	0	0	0.9019	0.6237	0	0	0	0	0	1.9956	2.444	2.1282	2.0648	2.2057	0	0	0	0	0	0	0.5293	0	0	0	0	0.2331	0	0	0	0.1993	0	0.5744	0	0
Negative	4.933	755.405	4.933_755.4053	0	0	0	0	0	5.3024	2.5337	2.2034	5.1349	4.0568	0	0	0	0	0	7.1415	6.0804	10.5251	4.7833	7.7015	0	0	0	0	0	1.6744	3.7196	3.7114	3.0239	2.2127	0	0	0	0	0	2.0159	2.9759	2.4617	2.837	4.321
Negative	4.6794	757.194	4.6794_757.1938	0	0	0	0	0	0.6957	0.8572	1.1427	0.6539	0.6114	0	0	0	0	0	0.3739	0.8899	0.6322	0.5143	0.3743	0	0	0	0	0	1.2822	1.2235	0.6197	1.6239	1.5335	0	0	0	0	0	1.6625	2.0457	2.5636	1.7298	1.0934
Negative	3.068	757.291	3.068_757.2912	0	0	0	0	0.182	0	0	0	0	0	0	0.2502	0	0	0	0	1.6179	2.3068	0	1.4821	0	0	0	0	0	0	1.3194	1.9546	0	0	0	0	0	0	0	0	0	0	0	0
Negative	1.9311	760.097	1.9311_760.0967	3.5208	2.5333	0	2.9757	3.0157	0	0	0	0	0	0	0.406	4.0911	0.91	0.5827	0	0	0	0	0	5.5399	0.7119	5.0929	3.3077	4.3223	0	0	0	0	0	6.014	5.3226	4.9571	7.1511	6.0455	0	0	0	0	0
Negative	2.9086	761.275	2.9086_761.2751	0	0	0	0	0	0	0	0	0	0	0	0	0	0	0	0	0	0	0	0	0	0	0.402	0	0	4.5408	0	0	0	4.1434	0	0	0	0	0	0	0	0	0	0
Negative	3.1916	761.276	3.1916_761.2757	0	0	0	0	0.212	0	0	0	0	0	0	0	0	0	0	0	0	0	0	0	0	0	0	0	0	4.9796	0.1746	0	0	6.9499	0.2382	0	0	0	0	0	0	0	0	0
Negative	0.5923	763.184	0.5923_763.1843	0.3916	0	0	0	0.4077	0	0	0	0.6464	0	0	0.84	0	0	0	0	0	0	0	0	0	0	0	0	0	0	0.2194	0.4071	0.705	0	2.7597	1.6467	0	2.0385	0	7.8706	3.2984	0	0	0
Negative	3.2319	763.29	3.2319_763.2903	0	0	0	0	0	0	0	0	0	0	0	0	0.2472	0	0	0	0	0	0	0.299	0.8431	0	0	0	0	2.1959	0	0	0	2.4727	0.8489	0	0	0	0	0	2.9136	0	0	1.3683
Negative	3.1397	763.291	3.1397_763.2912	0	0	0	0	0	0	0	0	0	0	0	0	0	0	0	0	0	0	0	0	0	0	0	0	0	61.3534	0.8326	0	0	57.611	0	0	0	0	0	1.7409	8.6721	0	1.7452	2.2202
Negative	2.9998	763.294	2.9998_763.2943	0.4845	0	0.2788	0	0.3834	0	0	0	0	0	0	0	0	0	0	0	0	0	0	0	0	0	0	0	0.5464	22.9381	0	0	0	24.7911	0	0	0	0	0	0	3.4413	0	0	0
Negative	2.3297	281.101	2.3297_281.1011	2.786	2.7995	0	3.3486	0	3.1008	2.0158	2.1346	2.1442	2.2312	0	0.4492	0	0	0	0	0	0.963	0.8255	0.5883	0	0	0	0	0	0.7128	0.5925	0	0	0	0	0	0	0	0	0.7084	0.8308	1.1283	1.2742	1.0136
Negative	4.1377	281.139	4.1377_281.1393	0.7309	0	0.6892	0.8545	0.7905	2.3981	2.1561	2.1002	1.2957	2.3974	0	2.6652	3.3828	0	0	0	0	0	0	0	0	0	0	0	0	0	0	0.6939	0.3554	0	0	0	0	0	0	0	0	0	0	0
Negative	2.9094	283.084	2.9094_283.0838	9.4708	14.0225	10.0123	12.5776	9.1648	30.1184	37.0181	36.3311	28.4087	29.4929	8.3761	17.771	7.445	0	8.9811	30.643	28.1836	52.5444	18.8488	31.821	0	0	0	0	0	0	0	0	0	1.0287	0	0	0	0	0	0	0	8.5246	0	0
Negative	3.0468	283.085	3.0468_283.0848	13.5355	15.0898	19.0314	19.8852	10.1214	30.9403	36.0922	32.3023	26.0026	23.3106	11.273	15.2934	9.5071	9.28	8.6178	12.829	19.2052	39.73	15.8949	20.4051	0	0	0	0	0	0	0	0	0	0	0	0	0	0	0	0	0	4.8355	0	0
Negative	2.7619	283.085	2.7619_283.0851	0	0	0	0	0	4.8543	6.2339	7.1713	7.0938	11.0066	0	0	0	0	0	5.3462	5.7334	15.6626	3.0735	5.824	0	0	0	0	0	0	0	0	0	0	0	0	0	0	0	0	0	1.6222	0	0
Negative	2.6826	283.085	2.6826_283.0851	0	0	0	0	0	4.8543	6.2339	4.9875	5.8599	5.2975	0	0	0	0	0	0	4.1402	12.0691	2.7986	5.3295	0	0	0	0	0	0	0	0	0	0	0	0	0	0	0	0	0	0	0	0
Negative	3.1166	283.087	3.1166_283.0868	0	2.5396	19.0314	3.3386	0	0	0	3.6705	4.3736	0	11.273	15.2934	0	0	8.6178	12.829	0	5.2835	0	0	0	0	0	0	0	0	0	0	0	0	0	0	0	0	0	0	0	0	0	0
Negative	3.2019	283.088	3.2019_283.0879	0	2.5396	2.5197	3.3386	1.8792	0	0	0	0.1975	0.1753	0	3.1298	0	0	0	0	0	0	0.1047	0	0	0	0	0	0	0	0	0	0	0	0	0	0	0	0	0	0	0	0	0
Negative	6.6047	283.154	6.6047_283.1544	0	0	0	0	0	0.676	1.0797	4.9567	1.381	1.6447	0	0	0	0	0	1.6805	3.199	3.1732	1.9795	1.5307	0	0	0	0	0	0.8198	2.7634	1.1974	1.6848	2.2453	0	0	0	0	0	3.9129	4.0885	4.3521	2.7062	2.0572
Negative	4.6145	285.04	4.6145_285.04	0	0	0	0	0	0.463	0.5313	0.4548	0.4646	1.5304	0	0	0	0	0	0	0	0.6514	0.5205	0.8084	0	0	0	0	0	0.4042	1.0449	1.2604	2.0729	0.6357	0	0	0	0	0	1.4887	0.9952	1.3501	1.2398	0.5039
Negative	3.7418	287.148	3.7418_287.1478	0	0	0	0	0	0.6471	0.9778	0.8225	0.5354	0.4745	0	0	0	0	0	0	0.6264	0.9785	0.666	0.9457	0	0	0	0	0	2.5383	0.9424	0	0.9164	2.0448	0	0	0	0	0	0.378	0.425	0.3335	0.9088	0
Negative	8.453	287.219	8.453_287.2194	0	0	0	0	0	1.661	1.5392	2.58	1.5378	0	0	0	0	0	0	0	0	0	0	0	0	0.8419	0	0	0	2.5271	3.2728	1.5837	1.4426	4.2808	0	0	0	0	0	0	0.9041	0.7728	2.3457	1.4605
Negative	0.4747	288.065	0.4747_288.0648	2.4628	0.717	1.9574	1.5913	2.7788	0	0	0	0	0	1.3539	3.1319	0	0.9546	1.0609	0	0	0	0.1157	0	0	0.8537	0	0.4207	2.0433	0.5036	0	0	0	0	0	0	0.5922	0	1.3655	0	0	0	0	0
Negative	0.4323	288.935	0.4323_288.9345	24.3341	27.9961	29.665	15.9173	21.3245	26.9986	23.6664	23.0223	36.4476	26.6568	32.0607	26.6362	29.753	35.8115	28.5371	22.1866	24.7477	19.7663	22.4852	23.1204	28.1855	26.1069	33.7955	34.1685	31.2797	19.8791	21.6408	18.3201	21.0369	17.5057	22.7211	30.7014	37.3632	28.8327	37.5264	26.9825	28.2676	19.2966	19.8736	17.7472
Negative	0.522	289.025	0.522_289.0249	1.1031	1.7867	1.0229	0	1.2839	0.5671	0.1976	0	0.4277	0	2.6393	0	3.0012	1.008	0	2.6137	0	0	0.7196	0.603	1.9221	1.0055	2.0393	0	2.8078	1.4974	0	0	0	1.4803	2.7351	2.0266	1.3525	4.6621	4.2993	0	0.5121	0.9254	0	0.5844
Negative	3.1438	289.083	3.1438_289.0833	0	0	0	0	0	0	0	0	0	0	0	0	0	0	0	0	0	0	0	0	0	0	0	0	0	12.5548	0	0	0	7.3438	0	0	0	0	0	0	0	0	0	0
Negative	5.1972	765.355	5.1972_765.3546	0	0	0	0	0	0	0	0	0	0	0	0	0	0	0	0	0	0	0	0	0	0	0	0	0	7.1326	4.9011	5.5682	3.6148	8.89	3.8449	4.4206	4.7855	0	4.8222	13.5408	18.3704	4.5869	15.6899	11.7387
Negative	2.7743	767.22	2.7743_767.2204	0.4537	0	0	0.3783	0	0	0	0	0	0	7.581	0	6.9621	10.6189	8.517	2.3372	4.683	0	5.0082	0	0	0	0	0	0	0	0	0	0	0	0	3.5739	2.6254	0	1.6503	0	6.2269	5.0245	8.7861	12.1502
Negative	2.5122	767.298	2.5122_767.2976	0	0	0	0	0	0.5443	0.4866	0.4349	0.5094	0.4825	0	0	0	0.2312	0	0.5291	0.1576	0.2598	0	0.2683	0	3.0725	0	0	3.9473	2.9979	2.9867	2.0781	2.8027	4.3806	2.9934	4.5044	0	0	0	3.9866	4.4628	3.8029	3.4754	5.8255
Negative	5.7753	767.367	5.7753_767.3675	0	0	0	0	0	0	0	0	0	0	0	0	0	0	0	0	0	0	0	0	0	0	0	0	0	0	0	2.7014	2.5795	3.3805	0	0	0	0	0	0	0	0	0	0
Negative	5.0513	767.369	5.0513_767.3691	0	0	0	0	0	0	0	0	0	0	0	0	0	0	0	0	0	0	0	0	0	0	0	0	0	5.5585	2.8051	2.8593	0	5.7282	3.1267	4.2848	3.1116	0	0	8.8849	14.3277	3.3454	9.6328	7.9174
Negative	4.3764	767.369	4.3764_767.3693	0	0	0	0	0	0	1.2045	0	0	1.5509	0	0	0	0	0	0	0	0	0	1.6541	0	0	0	0	0	0	0	0	0	1.9586	0	0	0	0	0	0	0	0	0	0
Negative	4.4908	767.37	4.4908_767.3699	0	0	0	0	0	1.7987	0	2.271	1.7589	1.9161	0	0	0	0	0	5.2448	2.4799	2.6468	0	2.8355	0	0	0	0	0	1.1985	0	0	0	3.196	0	0	0	0	0	0	0	0	0	0
Negative	5.1682	767.37	5.1682_767.3699	0	0	0	0	0	0	0	0	0	0	0	0	0	0	0	0	0	0	0	0	0	0	0	0	0	3.7428	4.729	4.7617	3.3223	4.6367	3.0061	3.8437	3.308	0	4.7343	10.3543	17.6694	3.4107	10.4539	7.6597
Negative	4.6411	767.37	4.6411_767.3705	0	0	0	0	0	0	1.1575	0	0	0	0	0	0	0	0	0	0	1.1455	0	1.4246	0	0	0	0	0	0	0	0	0	1.7961	0	0	0	0	0	0	0	0	0	0
Negative	5.315	767.373	5.315_767.3734	0	0	0	0	0	0	0	0	0	0	0	0	0	0	0	0	0	0	0	0	0	0	0	0	0	0	0	2.2927	0	2.0625	0	0	0	0	0	0	0	0	3.2402	2.5312
Negative	3.1619	769.166	3.1619_769.1659	0	0	0	0	0	2.2056	0	0	2.3174	0	0	0	0	0	0	0	0	0	0	0	0	0	0	0	0	0.1073	0	0	0	0	0	0	0	0	0	0	0	0	0	0
Negative	2.743	769.169	2.743_769.169	4.9216	5.3696	2.2545	4.7477	6.4308	0	0	0	2.1824	1.3989	0	0	0	0	3.9118	0	0	0	0	0	0	0	0	0	0	0	0	0	0.2145	0	0	0	0	0	0	0	0	0	0	0
Negative	2.7388	769.19	2.7388_769.1903	0	0	4.422	4.7477	0	0	2.1955	0	2.1824	1.3989	0	5.4514	0	0	0	0	0	0	0	0	0	0	0	0	0	0	0	0	0	0	0	0	0	0	0	0	0	1.007	0	0
Negative	3.9507	769.198	3.9507_769.198	0	0	0	0	0	0	0	0	0	0	15.3035	0	0	14.2026	10.557	4.0621	0	3.7155	4.6359	6.0942	8.9687	4.8905	8.2089	6.0188	8.8041	2.148	6.9094	3.9966	7.9519	2.1702	0	0	0	0	0	0	0	0	0	0
Negative	3.4811	769.199	3.4811_769.1992	8.5098	9.85	8.4902	9.8966	10.4323	6.8507	2.6894	4.4527	4.4662	2.5462	1.7642	2.2623	2.1036	0	1.6808	0	0	0	0	0	0	0	0	0	0	0	0	0	0	0	0	0.2733	0	0	0	0	0	0	0	0
Negative	3.8434	769.205	3.8434_769.2046	0	0	0	0	0	0	0	0	0	0	0	0	0	0	0	1.3509	0	1.2148	1.4101	1.8191	0	0	0	0	0	0.5544	2.5678	1.328	2.7313	0.4973	0	0	0	0	0	0	0	0	0	0
Negative	3.0003	289.084	3.0003_289.084	0	0	0	0	0	0	0	0	0	0	0	0	0	0	0	0	0	0	0	0	0	0	0	0	0	8.2728	0	0	0	5.3805	0	0	0	0	0	0	1.6254	0	0	0
Negative	3.2103	289.084	3.2103_289.0843	0	0	0	0	0	0	0	0	0	0	0	0	0	0	0	0	0	0	0	0	0	0	0	0	0	25.11	0	0	0	17.2754	0	0	0	0	0	0	3.7304	0	0	0
Negative	3.9088	289.111	3.9088_289.1115	5.4331	5.934	11.8126	8.7391	3.1652	9.8127	11.0284	11.6087	4.4128	9.2157	0	0	0	0	0	0	0	0	0	0	0	2.7872	0	6.2653	0	2.2689	1.8602	2.9388	2.6872	2.1077	0	0	0	0	0	0	3.6955	1.3121	4.4002	2.07
Negative	3.7833	289.112	3.7833_289.1117	0	0	0	0	0	0	3.0428	3.6663	2.3204	3.1867	0	0	0	0	0	0	0	0	0	0	0	0	0	0	0	0	0	0	0	0	0	0	0	0	0	0	0	0	1.604	0
Negative	0.534	291.054	0.534_291.0536	3.8533	1.4413	1.6878	3.2882	2.904	0	0	0	0	0	2.672	3.8833	3.0462	1.6417	6.0298	13.4919	0	1.8918	1.8809	1.2823	2.544	3.3336	2.0616	4.2364	2.2834	2.2319	0	2.3129	1.7927	0	1.3852	1.4511	1.3358	1.0684	1.7554	0	0	0	0	0
Negative	0.6252	291.054	0.6252_291.0536	0	0	0	0	0	0	1.9002	1.903	0	0	0	0	0.473	0	0	5.5752	2.4168	2.402	2.2255	2.7889	0	0	0	0	0.5832	2.9657	1.4631	2.3129	1.7927	2.834	0	0	0	0	0	0	1.2679	0	0	0
Negative	3.241	291.144	3.241_291.1442	0	0	0	0	0	16.5727	2.2867	4.462	12.4234	8.4966	28.6636	4.4316	29.7938	41.0101	7.1428	30.2553	18.9797	16.828	21.1048	7.0213	0	0	0	0	0	0	0	0	0	0	0	0	0	0	0	0	0	1.3341	0	0
Negative	1.3975	291.143	1.3975_291.1428	0	0	0	0	0	0	0	0	0	0	0	0	0	0	0	0	2.1239	0	2.384	0.8575	0	0	0	0	0	0	0	0	0	0	0	0	0	0	0	0	0	0	0	3.6079
Negative	3.4206	291.143	3.4206_291.1429	0	0	0	0	0	0	0.6606	0	0	0	0	0	0	0	0	2.229	0	1.8042	0	0.6752	0	0	0	0	0	0	0	0	0	0	0	0	0	0	0	0	0	0.4808	0	0.7735
Negative	3.1269	291.145	3.1269_291.1449	0	0	0	0	0	5.9336	1.0535	1.9496	3.7623	2.9984	0	0	0	0	0	10.7359	6.907	6.3311	7.1059	2.166	0	0	0	0	0	0	0	0	0	0	0	0	0	0	0	0	0	0	0	0
Negative	7.7307	291.195	7.7307_291.1945	0	0	0	0	0	0	0	0	0	1.4065	0	0	0	0	0	0	0	1.5897	7.9654	2.6928	0	0	0	0	0	0	1.7982	1.8819	1.3926	0	0	0	0	0	0	0	0	0	0	0
Negative	3.3874	293.065	3.3874_293.0646	0	0	0	0	0	0	0	0.5772	0.5478	0	0	0	0	0	0	0	0	0	1.9392	1.3295	0	0	0	0	0	0	1.72	0	0	0	0	0	0	0	0	0	0	0	0	0
Negative	2.632	293.066	2.632_293.0657	0	0	0	0	0	1.1137	0	0	0.9568	0.9667	3.2836	4.0612	0	0	0	2.6604	5.9072	3.3218	1.0804	0	0	0	0	0	0	1.9473	2.7667	4.7006	3.4897	3.1664	0	0	0	0	0	0	0	0	0	0
Negative	3.497	293.066	3.497_293.0661	0	0	0	0	0	0.6558	0	1.7281	1.3415	0	0	0	0	0	0	0.9007	0.8442	1.9219	7.1913	5.0289	0	0	0	0	0	0.8835	5.8346	0	0.7411	0	0	0	0	0	0	0	0	0	0	0
Negative	1.3327	293.118	1.3327_293.1185	0	0	0	0	0	0	0	0	0	0	0	0	0	0.8077	1.2427	3.8133	0	1.9105	0.9002	0	0	0.5675	0	0	0.5508	3.1644	0	0	0	1.6895	0	0	0	0	0	0	0	0	0	0
Negative	1.7823	293.12	1.7823_293.1203	0	0	0	0	0	1.0504	0	1.5841	0	0	0	0	0	0	0	0	0	0	0	0	0	0	0	0	0	2.9712	0	0	0	1.9123	0	0	0	0	0	0	0	0	0	0
Negative	2.5071	769.221	2.5071_769.2211	1.2178	1.235	0	0.9167	1.3373	0	0	0	0	0	2.9924	4.0621	2.4569	4.7728	4.842	0	0	0	0	0	4.6579	6.91	2.6006	4.0133	4.6453	0	0	0	0	0	2.6223	2.5516	2.5196	1.8658	2.8158	0	0	0	0	0
Negative	2.4418	769.221	2.4418_769.2212	0	0	0	0	0	0	0	0	0	0	0	0	0	0	0	0	0	0.9381	1.4733	1.047	0	0	0	0	0	1.4464	0	1.4801	1.5804	1.5208	0	0	0	0	0	0	1.496	0	0	0
Negative	4.1552	769.382	4.1552_769.3816	0	0	0	0	0	1.9309	0	2.2484	2.0493	1.9985	0	0	0	0	0	2.0167	0	0	0	2.6441	0	0	0	0	0	1.1612	0	1.3209	1.3939	1.8225	0	0	0	0	0	0	0	0	0	0
Negative	4.313	769.385	4.313_769.3851	0	0	0	0	0	2.1239	0	0	1.9897	2.6018	0	0	0	0	0	0	2.0978	2.4408	1.6242	3.5878	0	0	0	0	0	0	0	0	1.5602	1.9026	0	0	0	0	0	0	0	0	0	0
Negative	4.4365	769.385	4.4365_769.3855	0	0	0	0	0	0	2.7804	0	0	0	0	0	0	0	0	3.9024	2.1495	2.6344	0	2.7761	0	0	0	0	0	1.7173	0	0	4.9213	4.6443	0	0	0	0	0	0	0	0	0	0
Negative	4.9877	769.386	4.9877_769.3865	0	0	0	0	0	0	0	0	0	0	0	0	0	0	0	0	0	0	0	0	0	0	0	0	0	0	0	0	0	0	0	0	0	0	0	5.089	7.861	0	4.3946	0
Negative	4.605	769.386	4.605_769.3865	0	0	0	0	0	0	1.154	0	0	0	0	0	0	0	0	0	0	1.9789	0	1.9992	0	0	0	0	0	0.6878	0	0	0	0	0	0	0	0	0	0	0	0	0	0
Negative	2.735	771.178	2.735_771.1776	121.566	121.023	61.0377	92.2017	113.17	47.0729	44.2025	36.4975	56.2351	31.6095	60.742	97.6697	57.2553	35.9707	94.7344	19.7006	48.7697	56.5534	22.786	49.8193	0	2.7012	0	0	0	0	0	0	1.9379	0	0	4.7011	0	0	0	0	0.2038	6.9386	0	0
Negative	1.965	771.199	1.965_771.1992	4.0699	3.9897	0	3.2135	4.8141	0	0	0	0	0	3.2802	5.8422	3.2182	0	6.5311	0	0	0	0	0	25.1195	30.5125	5.4083	10.3059	11.8709	0	3.2771	4.645	4.6668	0	3.97	3.5529	3.3094	2.574	4.0975	0	0	0	0	0
Negative	1.698	771.199	1.698_771.1994	4.8343	2.905	0	0	5.4634	2.4677	0	0	2.4622	0	0	0	3.5127	0	0	0	0	2.3666	0	1.974	0	0	0	0	0	0	2.0063	0	0	0	4.4799	3.525	3.8998	0	4.6721	0	2.9838	2.8058	3.4173	1.5942
Negative	1.8932	771.206	1.8932_771.2062	0	0	0	0	0	0	0	0	0	0	0	0	0	0	0	0	0	0	0	0	0	0	0	0	0	0	3.2771	4.645	4.6668	0	0	0	0	0	0	0	0	0	0	1.126
Negative	3.0896	771.232	3.0896_771.2319	0	1.0223	0.6771	0	0	0	0	0.6223	0	0	0	0	0	0.4984	0	0	0	0	0	0	0	2.9113	1.9707	0	0	0	0	1.8639	1.866	0	3.3203	3.5773	4.5988	0	0	2.6151	0	0	0	0
Negative	3.7859	771.274	3.7859_771.2739	0	0	0	0	0	0.3414	0.1855	0	0	0	0	0	0	0	0	2.1803	1.977	1.9184	2.1362	1.5475	0	0	0	0	0	0	0	0	0.6631	0	0	0	0	0	0	0	0	0	0	0
Negative	5.256	773.325	5.256_773.3252	0	0.3986	0	0	0.3392	0	0.7768	0	0.853	0	0.4234	0.2414	0	0	0	0	0.8969	0	0.8612	0.9597	0	0.704	0	0.6498	0.7864	1.6616	2.3234	2.2918	1.9741	1.4769	0.5176	0.5192	0	0	0	1.0862	1.6396	3.1982	4.29	4.236
Negative	5.1995	773.328	5.1995_773.3284	0	0	0	0	0	0	0.8411	0	0.6317	0.8399	0	0	0	0	0	0	0	0	0	0	0	0	0	0	0	1.6616	1.9117	1.9003	1.9741	1.4769	0	0	0	0	0	0.8597	0	0	2.3086	1.8797
Negative	0.3823	774.274	0.3823_774.2735	0	0	0	0.0624	0.1039	0.1879	0.6511	1.9171	1.0206	0.9197	0	0	0	0	0.0489	0	0.6585	0.8859	0.9715	0.4937	0.2865	0	0	0.2572	0.3888	0.38	0	0	0.0888	0.6378	0	0	0	0	0.1413	1.7606	0.717	0.5666	0.0357	1.6205
Negative	1.9773	293.121	1.9773_293.1209	0	0	4.8626	0	0	4.9871	8.3588	6.6534	2.8691	2.6671	4.5165	8.0012	0	0	0	0	3.2871	6.8527	3.7653	5.3296	0	0	0	0	0	9.7026	8.8408	6.0894	8.3969	6.1196	0	5.3969	0	0	0	3.3052	3.6528	4.6574	5.2643	5.4969
Negative	1.8833	293.122	1.8833_293.122	0	0	0	0	0	0	3.5736	3.437	0	0	0	0	0	0	0	0	0	0	2.0626	0	0	0	0	0	0	4.4699	0	0	0	3.0881	0	0	0	0	0	0	0	0	0	0
Negative	1.5408	293.123	1.5408_293.1233	0	0	0	0	0	0.5115	0	0.5013	0	0	0	0	0	0	0	2.4932	0	2.0264	0.8993	0.535	0	0	0	0	0	0.2966	0.524	0.7809	0.4586	0.5864	0	0	0	0	0	0.8742	0	0	0.8993	0
Negative	2.0721	293.124	2.0721_293.1239	5.9738	8.0876	4.8626	7.8768	10.0302	4.538	6.0009	5.4271	2.9168	3.0604	4.0361	6.1769	3.573	4.8274	4.5642	4.0061	2.48	8.1336	2.9918	6.3935	9.8176	12.0751	12.1486	13.0452	11.9749	4.9148	3.6047	3.4376	4.035	3.0793	8.1038	8.148	4.5364	7.2253	9.1194	2.737	4.3408	4.778	5.8531	6.6253
Negative	1.4325	293.124	1.4325_293.1242	1.4061	0	1.7885	1.5913	0.7012	0	0	0	0	0	1.4821	0	1.2483	1.8	0	1.6022	0	2.0336	1.7458	0	3.541	2.7488	5.778	3.4827	1.4029	0	0	0	0	0	2.0458	1.7016	1.2552	2.2308	1.3655	0	0	0	0	0
Negative	7.5584	293.176	7.5584_293.1756	0	0	0	0	0	2.6563	1.6254	10.524	3.8233	0	0	0	0	0	0	2.4229	1.6112	0	0	7.1697	0	0	0	0	0	1.2545	4.0368	2.7792	0	2.1294	0	0	0	0	0	5.577	8.0075	5.2898	1.5336	6.4986
Negative	8.3097	293.176	8.3097_293.1765	0	0	0	0	0	2.9684	8.4374	8.3464	4.156	2.1647	0	0	0	0	0	3.242	0	0	4.1723	3.5402	0	0	0	0	0	2.2526	0	0	0	3.9891	0	0	0	0	0	4.2149	15.0477	0	2.6821	0
Negative	7.7936	293.177	7.7936_293.1774	0	0	0	0	0	0	0	3.6179	0	0	0	0	0	0	0	0	0	9.7122	0	0	0	0	0	0	0	0	0	3.8466	0	0	0	0	0	0	0	0	0	2.2151	0	0
Negative	8.7499	293.178	8.7499_293.1775	0	0	0	0	0	0	0	0	0	0	0	0	0	0	0	0	4.3767	0	0	0	0	0	0	0	0.4488	0	5.9662	0	0	0	0	0	0	0	0	16.3117	0	0	0	0
Negative	8.5934	293.178	8.5934_293.1776	0	0	0	0	0	0	11.7421	0	0	0	0	0	0	0	0	0	7.129	0	0	0	0	0	0	0	0	0	10.7486	0	0	0	0	0	0	0	0	0	4.9199	0	0	0
Negative	8.4884	293.178	8.4884_293.178	0	0	0	0	0	0	14.4157	0	0	0	0	0	0	0	0	0	0	0	0	0	0	0	0	0	0	0	0	0	0	0	0	0	0	0	0	0	10.4321	0	0	0
Negative	7.4445	293.178	7.4445_293.1781	0	0	0	0	0	0	0	5.9799	0	0	0	0	0	0	0	0	0	0	0	0	0	0	0	0	0	0	0	0	0	0.1794	0	0	0	0	0	0	0	4.5907	0	0
Negative	7.9024	293.178	7.9024_293.1784	0	0	0	0	0	0	0	0	0	0	0	0	0	0	0	0	0	9.8152	0	0	0	0	0	0	0	0	0	2.6788	0	0	0	0	0	0	0	0	0.2065	0	0	0
Negative	7.6959	293.183	7.6959_293.1828	0	0	0	0	0	0	0	4.6514	0	0	0	0	0	0	0	0	0	5.1196	0	0	0	0	0	0	0	0	0	5.8492	0	0	0	0	0	0	0	0	0	2.3327	0	0
Negative	7.7435	293.209	7.7435_293.209	0	0	0	0	0	1.2271	0	0	0	0	0	0	0	0	0	0	0	0	0	0	0	0	0	0	0	0	1.7655	6.8925	3.2447	0	0	0	0	0	0	0	0	0	0	0
Negative	0.4759	294.894	0.4759_294.8938	0	0	0	0	0	0.8425	0.7816	0.3296	0.5757	1.0823	0	0	0	0	0	3.3064	2.1088	1.1054	1.0572	2.1638	0	0	0	0	0	0	0	0.4189	0	0	0	0	0	0	0	0	0.9529	0.6851	0.6022	1.2209
Negative	4.4836	775.208	4.4836_775.2085	2.9221	3.4989	0	0	3.2204	2.1062	1.2972	2.0923	2.1009	2.5889	4.4045	2.808	4.7737	3.8025	4.7216	3.1908	5.508	8.4209	4.0649	7.2341	0	0	0	0	0	0.8048	3.1559	2.888	3.2917	1.0399	0	0	0	0	0	3.2465	1.9105	1.9426	2.9804	0.7488
Negative	0.4306	776.808	0.4306_776.808	0.8523	0.967	0.9363	0.183	0.8432	1.2834	0.9193	0.7934	1.7682	1.5161	1.5511	1.31	1.2	1.6697	1.1726	0	0	0.8517	0.8277	0.9493	0	1.3874	1.6289	1.7299	1.8674	0.898	0	0.6352	1.0061	1.0259	1.0987	1.4094	1.6802	1.6373	1.5256	1.4719	1.3191	0.7869	0	0.6294
Negative	5.9372	777.193	5.9372_777.1926	0	0	0	0	0	0	0.075	0	0	0	0	0	0	0	0	0	0	0	0	0	0	0	0	0	0.0648	0	0	0	0	0	0	0	0	0	0	2.6882	0	0.0569	1.8118	0
Negative	2.8639	777.209	2.8639_777.2089	0	0	0	0	0	0	0	0	0	0	0	0	0	0	0	0	0.5003	0	0	0	0	2.711	0	0	0	0	1.1693	3.3971	2.2624	0	0	0	0	0	0	0	0	0	0	0
Negative	2.7703	777.3	2.7703_777.3	0	0	0	0.317	0	3.6992	4.8017	4.5601	0	2.336	0	0	0	0	0	10.5655	10.617	4.8438	4.3099	2.149	0	0	0	0	0	0	0	1.7249	0	0	0	0	0	0	0	0	4.056	0	0	3.0045
Negative	0.5137	781.171	0.5137_781.1712	0	2.6851	3.7847	0.9524	0	0	0	0	0	0	3.2771	0.8176	0	1.6216	0.3623	0	0	0	0	0	1.748	0	2.5008	1.0223	2.1494	0	0	0	0.094	0	0	0	0	0	2.2998	0	0	0	0	0
Negative	0.6115	781.198	0.6115_781.1977	0	0	0	0	0	2.0244	1.0209	1.0822	4.4636	2.4699	0	0	0	0	0	0.195	1.2845	1.2049	1.8754	2.8546	0	0	0.3065	0	0	0.3561	0	2.8172	3.6468	0	0	0	0	0	0	3.8	3.7495	2.9289	0	2.6645
Negative	0.5354	781.199	0.5354_781.1988	0.8811	2.6851	3.0958	0.6547	1.2315	0	0	0	0	0	2.962	1.8113	3.3148	1.6216	0.9005	0.1219	0	0	0	0.105	0	1.1394	0	0.9879	1.2648	0	0	0	3.6468	0	2.1164	3.866	4.765	3.2308	1.6707	3.8	3.7495	0	0	0
Negative	4.4949	781.348	4.4949_781.3479	0	0	0	0	0	0	0	0	0	0	0	0	0	0	0	0	0	0	0	0	0	0	0	0	0	1.8565	0.7898	1.0466	0	6.319	0	0	0	0	0	0	1.6328	0	0	0
Negative	4.3589	781.352	4.3589_781.3521	0	0	0	0	0	0	0	0	0	0.1609	0	0	0	0	0	0	0	0	0	0	0	0	0	0	0	0	0	0	0	2.184	0	0	0	0	0	1.4368	2.8598	0	0	1.2796
Negative	3.0472	783.235	3.0472_783.2351	0	0	0	0	0	0.5249	0.32	0.2328	0	0	0	0	0	0	0	0	0	0	0	0	0	0	0	0	0	0.2894	1.556	2.2306	2.6191	0.4798	0	0	0	0	0	0	0	0	0.4892	0
Negative	4.3535	783.365	4.3535_783.3648	0	0	0	0	0	0	0	0	0	0	0	0	0	0	0	0	0	0	0	0	0	0	0	0	0	2.3734	0	0	0	3.7594	0	0	0	0	0	1.9399	2.9601	0	0	1.5829
Negative	3.1468	785.192	3.1468_785.1923	0	0	0	0	0	7.1254	10.2021	9.4078	8.0049	5.4123	0	0	0	0	0	2.6964	4.5037	4.9292	3.4423	5.2156	0	0	0	0	0	0	0	0	0	0	0	0	0	0	0	0	0	0	0	0
Negative	3.0346	785.194	3.0346_785.1936	0	7.9347	5.6607	0	0	1.0487	0	0	0	0	0	0	0	0	0	0	0	0	0	0	0	0	0	0	0	0	0	0	0	0	0	0	0	0	0	0	0	0	0	0
Negative	3.2012	785.194	3.2012_785.1937	25.4339	20.3464	13.2902	21.5031	23.5145	0	0	0	0	0	8.717	18.4386	11.1937	6.4289	18.1756	2.6964	0	0	0	5.2156	0	0	0	0	0	0	0	0	0	0	0	0	0	0	0	0	0	0	0	0
Negative	3.4144	785.198	3.4144_785.1984	0	0	0	0	0	0	0	0	0	0	0	0	0	0	0	0	0	0	0	0	0	0	0	0	0	0.3724	1.9794	2.5437	2.403	0.5385	0	0	0	0	0	0	0	0	0	0.607
Negative	0.4557	294.953	0.4557_294.9526	0	0	0	0	0	0	0.2966	0	0	0	0	0	0	0	0.4008	0	0	0	0	0	0	1.2667	0	0	0	0.5003	0	0	0	0	1.0292	3.2647	1.6439	0	1.8223	0	0	2.0823	0	0
Negative	0.9862	295.102	0.9862_295.1024	4.7139	6.0839	5.6665	5.0901	3.6153	4.3068	3.827	3.967	5.2868	6.6175	7.076	6.7499	7.4587	7.1994	7.8536	5.4887	6.4986	10.1222	4.8116	9.0079	8.5187	8.8769	7.2809	7.3418	5.8276	5.5979	7.8674	10.142	16.1907	12.281	6.5604	5.4987	7.6597	5.5361	3.988	7.4466	8.9723	8.9914	8.7822	6.4461
Negative	0.8697	295.104	0.8697_295.1039	0	0	0	0	0	0	0	0	0	0	0	0	0	0	0	2.2646	1.7987	3.0797	0	3.0618	0	0	0	0	0	2.361	3.1256	2.7982	4.1679	4.2092	0	0	0	0	0	0	0	0	0	2.1705
Negative	0.4529	296.878	0.4529_296.8782	19.3765	24.5594	34.9089	17.8816	19.5172	0	0	0	0	0	18.8512	4.4655	13.7955	19.412	7.2504	0	0	0	0	0	13.925	11.9737	16.6484	16.7224	14.9544	2.0497	0	0	0	0	6.798	5.3872	5.9195	9.7902	6.7152	0	0	0	0	0
Negative	6.5574	297.15	6.5574_297.1499	0	0	0.824	0	0	0	2.7601	0	0	0	0	0	0.8536	0	0	0	1.8069	0	0	0	0	0	0	0	0	0	0	0	0	0	0	0	0	0	0	0	0	0	1.8955	0
Negative	7.186	297.152	7.186_297.1517	0	0	0	0	0	13.0153	0	3.3928	0	0	0	0	0	0	0	0	0	2.7805	0	0	0	0	0	0	0	2.65	0	0	0	0	0	0	0	0	0	0	0	3.7301	0.2618	0
Negative	8.1188	297.152	8.1188_297.1518	0	0	0	0	0	20.2962	0.1493	0	0	0	0	0	0	0	0	0	0	0	0	0	0	0	0	0	0	6.0418	0	0	0	0	0	0	0	0	0	6.146	0	0	0	0
Negative	7.7487	297.152	7.7487_297.152	0	0	0	0	0	0	5.3453	0.1665	0	0	0	0	0	0	0	0	5.9531	0	0	0	0	0	0	0	0	0	4.7433	0	0	0	0	0	0	0	0	0	0	0	0	0
Negative	6.9705	297.152	6.9705_297.1522	0	0	0	0	0	6.836	0	0	2.0153	0	0	0	0	0	0	0	0	0	1.6293	0	0	0	0	0	0	0	0	0	1.1259	0	0	0	0	0	0	0	0	0	0	0
Negative	8.038	297.152	8.038_297.1523	0	0	0	0	0	20.9594	0	0	0	0	0	0	0	0	0	0	1.1683	0	0	0	0	0	0	0	0	0	1.3627	0	0	0	0	0	0	0	0	9.9186	0	0	0	0
Negative	6.4446	297.152	6.4446_297.1524	0	0	0.2613	0	0	0	0	0	0	0	0	0	0	0	0	0	1.2427	0	0	0	0	0	0	0	0	0	0	0	0	0.5343	0	0	0	0.5295	0	0	2.9476	0	1.8065	0
Negative	7.3804	297.152	7.3804_297.1524	0	0	0	0	0	5.372	0	3.2907	0	0	0	0	0	0	0	0	0	3.5066	0.1891	0	0	0	0	0	0	4.0612	0.3312	1.5103	0	0	0	0	0	0	0	0	0	2.7652	0	0.2197
Negative	6.7908	297.153	6.7908_297.1526	0	0	0	0.8515	0	6.061	3.5078	0	2.5366	0	0	0	0	0	0	0	3.6896	0	2.2394	0	0	0.5609	0	0	0.7648	1.6766	2.8199	0	1.6822	0	0	0	0.852	0	0	3.0158	3.1174	0	2.2042	0
Negative	6.6733	297.153	6.6733_297.1526	0	0	0.6012	0	0.6557	4.7483	3.4927	0	2.301	0	0.875	0	0.6647	0	0	0.4623	3.1955	0	0.8788	0	0	0	0	0	0	0	0	0	0	0	0	0	0	0	0	0	0	0	2.2951	0
Negative	8.2322	297.153	8.2322_297.1527	0	0	0	0	0	10.534	0	0	0	0	0	0	0	0	0	0	0	0	0	0	0	0	0	0	0	6.036	0	0	0	0	0	0	0	0	0	2.7287	0	0	0	0
Negative	7.604	297.153	7.604_297.1527	0	0	0	0	0	0	4.5911	0	0	0	0	0	0	0	0	0	1.6947	2.2508	0	0	0	0	0	0	0	0	2.4734	0.4509	0	0	0	0	0	0	0	0	11.0977	0	0	0
Negative	3.2215	785.239	3.2215_785.2393	0	0	0	0	0	0.5158	0.6461	0.5505	0.7026	0	0	0	0	0	0	0	0	0	0	0	0	0	0	0	0	0	0.9878	0.9495	1.2453	0	0	0	0	0	0	2.4178	0	1.1996	1.8943	1.1292
Negative	2.0501	785.284	2.0501_785.2838	0	0	0.0932	0	0	0	0.3082	0	0	0	0	0	0	0	0	0	0.6313	0	0	0	0	0	0	0	0	3.9537	1.7912	2.4881	2.3056	3.4317	0	0	0	0	0	0	0	0	0	0
Negative	8.4278	785.399	8.4278_785.3991	0	0.2809	0	0	0	1.7632	2.4608	3.2497	1.839	1.7592	0	0	0	0	0	0	2.4945	3.9191	2.6912	1.4934	0	0	0	0	0	0.2991	0	0	0	0.3499	0	0	0	0	0	0	2.196	1.0524	1.6886	1.7855
Negative	8.5546	785.405	8.5546_785.4051	0	0	0	0	0	1.9885	2.9343	0	2.012	0.9469	0	0	0	0.3599	0	0	2.958	3.1627	2.6225	0	0	0	0	0	0.1296	0.3071	0.178	0.2672	0	0	0	0	0.3825	0	0.3296	0	2.2796	1.2994	1.6739	0
Negative	2.897	787.167	2.897_787.1665	4.2527	2.9316	0.6308	1.5482	3.1283	0	0	0	0	0	0	1.0821	0	0	0	0	0	0	0	0	0	0	0	0	0	0	0	0	0	0	0	0	0	0	0	0	0	0	0.1543	0
Negative	1.7649	787.2	1.7649_787.1996	3.219	0	0	0	3.5885	2.0659	2.5604	0	2.6632	0	0	0	0	0	0	0	1.0203	0.8307	0	0.4646	0	0	0	0	0	0	0.3859	0	0	0	0	0	0	0	0	0	0	0	0	0
Negative	3.5893	787.299	3.5893_787.2995	0	0	0	0	0	2.5082	0	0	2.3361	0	0	0	0	0	0	0	0	0	0	0	0	0	0	0	0	1.771	0	0	0	2.1886	0	0	0	0	0	0	0	0	1.9379	2.1085
Negative	2.1023	788.124	2.1023_788.1235	1.6245	0.7207	1.2541	0.7821	1.2776	0	0	0	0	0	4.3416	1.9009	4.809	3.5016	3.4561	0.0729	0.3123	0	0.6022	0	5.2645	4.0908	5.027	6.3092	5.5531	0.2768	0.4101	0	0	0.3503	0.2323	0.3217	0	0.5079	0.3915	0	0.0428	0	0	0
Negative	2.0843	793.279	2.0843_793.2794	0	0	0	0	0	0.3208	0	0	0.097	0.201	0	0	0	0	0	2.0138	1.7797	0.6075	2.63	0.8776	0	0	0	0.1674	0.1314	0	0.8393	0.4398	0	0	0	0	0	0	0	0	0	0	0	0
Negative	2.768	795.309	2.768_795.3095	0	0	0	0	0	1.3507	2.5906	1.212	0.5611	0	0	0	0	0	0	5.72	5.5737	0.8767	1.0651	0	0	0	0	0	0	0	0	0	0	0	0	0	0	0	0	0	0.616	0.3512	0	0
Negative	2.5415	795.314	2.5415_795.3138	0	0	0	0	0	0	0	0	0	0	0	0	0	0	0	0	0	0	0	0	0	0	0	0	0	1.8193	0.1571	0.4258	0.7075	3.7256	0	0	0	0.1538	0	0	0	0	0.7521	1.9889
Negative	5.5925	795.366	5.5925_795.3657	0	0	0	0	0	0.7091	1.0783	0.7543	1.2185	0.8971	0	0.3142	0	0	0	0	0.8676	1.3577	1.1663	0.8504	0	0	0	0	0	3.7191	5.5014	4.6065	4.9615	5.2695	0	0	0	0	0	0.5476	0.4482	0.8496	1.2102	1.3861
Negative	5.4559	795.369	5.4559_795.3694	0	0	0	0	0	0	0	0	0	0	0	0	0	0	0	0	0	0	0	0	0	0	0	0	0	3.1067	0	0	0	3.3247	0.401	0	0	0	0	0	0	0	0	0
Negative	6.2745	797.248	6.2745_797.2478	0	0	0	0	0	0.4345	2.3229	1.4344	0	1.8668	0	0	0	0	0	0	0	0	0	0	0	0	0	0	0	0	0	0	0	0	0	0	0	0	0	0	0.0673	0	0	0
Negative	3.0632	797.25	3.0632_797.2501	2.0466	1.7108	1.3308	2.0257	2.042	0	0	0	0	0	2.3476	0	0	0	0	0	0	0	0	0	3.5916	0	0	0	0	0	0	1.8308	0	0	0	0	0	0	0	0	0	0	0	0
Negative	3.4784	797.253	3.4784_797.2527	0	0	0	0	0	0	0	0	0	0	0	0	0	0	0	0	0	0	0	0	4.6915	4.1571	0	0	0	0	4.7546	5.2863	5.3799	1.7961	5.015	5.3362	9.1863	0	0	6.7836	0	0	2.3712	0
Negative	7.8313	297.153	7.8313_297.1529	0	0	0	0	0	0	3.9873	0	0	0	0	0	0	0	0	0	5.5275	0.3466	0	0	0	0	0	0	0	0	4.7912	0	0	0	0	0	0	0	0	9.8736	7.2104	0	0	0
Negative	7.9193	297.153	7.9193_297.1529	0	0	0	0	0	0	2.5881	0	0	0	0	0	0	0	0	0	3.8952	0	0	0	0	0	0	0	0	0	3.3703	0	0	0	0	0	0	0	0	12.2508	0	0	0	0
Negative	8.3195	297.154	8.3195_297.1535	0	0	0	0	0	4.9733	0	0	0	0	0	0	0	0	0	1.0689	0	0	0	0	0	0	0	0	0	4.0656	0	0	0	0.171	0	0	0	0	0	0	0	0	0	0
Negative	5.4423	299.055	5.4423_299.0551	0	0	0	0	0	2.8576	1.9207	2.1963	3.0011	2.3242	0	0	0	0	0	1.8102	1.7067	2.2134	3.264	1.9144	0	0	0	0	0	0.6412	1.0325	0	0.7581	0.471	0	0	0	0	0.2354	0.5685	0.3702	0	0.3391	0.4115
Negative	5.5119	299.056	5.5119_299.056	3.9536	3.5025	1.2117	3.8023	4.1281	0	0	0	0.2753	0.3058	1.2181	1.2572	1.8416	1.5421	3.2874	0	0	0	0	0	0.9044	0.8169	1.0768	1.8143	1.7173	0	0	0	0	0	0.5265	0	0	0.3932	0	0	0	0	0	0
Negative	1.8514	299.076	1.8514_299.0756	0	0	0	0	3.0283	2.7196	0	0	0	0	12.392	0	5.6714	6.0607	4.4467	21.0117	4.2509	11.5155	4.992	5.8605	4.1585	0	0	0	0	0	0	0	0	0	0	0	0	0	0	0	0	0	0	0
Negative	1.7088	299.079	1.7088_299.0786	0	0	0	0	0	0.7769	0.2417	0	0	0	0	0	0	0	0	5.4721	0	2.6315	0.868	0.6868	0	0	0	0	0	0	0	0	0	0	0	0	0	0	0	0	0	0	0	0
Negative	1.5005	299.079	1.5005_299.0792	5.1469	4.277	3.6896	4.5262	0	3.2933	6.5119	5.1338	3.8746	2.3871	0	6.5937	0	0	0	9.484	4.7209	11.0406	3.9365	5.3522	0	0	0	0	0	0	0	0	0	0	0	0	0	0	0	0	0	0	0	0
Negative	1.3613	299.08	1.3613_299.08	3.614	0	3.355	3.8389	0	2.3824	5.7232	4.8573	2.2817	0	0	6.739	0	0	0	0	4.5933	7.5551	3.1781	5.3542	0	0	0	0	0	0	0	0	0	0	0	0	0	0	0	0	0	0	0	0
Negative	1.6504	299.11	1.6504_299.1102	0	0	3.3445	0	0	0	0	0	0.9091	0	0	0	0.4697	0	0	0	0	0	0	0	0	0	0	3.1549	0	0	0	0	0	0.3422	0	0	0	0	0	0	0	0	3.003	0
Negative	1.6983	300.11	1.6983_300.1097	0	0	0.7655	0	0	0	0	0	0	0	0	2.5989	0	0	2.591	0	2.2352	2.3964	2.5516	0	0	0	0	0.6115	0.3937	0	0	0	0	0.594	0.4334	0.3501	0	0.3846	0	0	0	0	0	0
Negative	5.232	301.164	5.232_301.1642	0	0	0	0	0	1.246	0.7107	1.1144	0	0.9493	0	0	0	0	0	0	0	0	1.8602	0	0	0	0	0	0	0.4867	0.3539	0.335	0.4155	1.3301	0	0	0	0	0	0	0.9627	2.9624	0.5953	3.4827
Negative	2.2844	303.088	2.2844_303.0877	0	0	0	0	0	0	2.6183	3.2001	0	1.9095	0	0	0	0	0	2.0386	1.3644	1.8161	0	0.9791	0	0	0	0	0	51.7995	9.6859	11.3518	16.4605	39.6737	0	0	0	0	0	5.3249	9.0957	9.5172	16.9487	29.015
Negative	2.4044	303.088	2.4044_303.0878	0	0	0	0	0	2.1957	2.6183	3.1842	0	2.0788	0	0	0	0	0	1.4858	0	1.8161	0	0.6314	0	0	0	0	0	56.7786	14.7059	15.8061	20.4203	48.3788	0	0	0	0	0	5.0441	9.1088	14.7392	19.72	30.9803
Negative	2.6295	303.088	2.6295_303.0884	5.1927	7.6414	8.0547	6.95	4.707	7.4782	16.815	16.6444	4.9565	7.2885	5.8295	7.4404	0	7.9587	12.6354	9.9421	7.2223	3.8442	0	2.0496	63.976	119.972	52.6297	118.125	87.1017	362.406	55.9052	65.4273	72.0248	262.17	10.2339	14.8975	6.7715	14.0918	21.825	54.4664	74.6458	66.575	80.24	93.8682
Negative	3.0973	303.089	3.0973_303.0888	6.1358	6.9168	7.1808	7.9732	0	24.873	26.0311	29.4599	44.2697	44.6446	0	0	4.6244	0	0	26.4619	26.3057	17.4025	20.2903	12.006	0	0	0	0	0	63.1455	15.8087	21.6029	30.8862	63.0932	0	0	0	0	0	20.5518	40.7539	27.3812	54.1204	36.0594
Negative	5.5532	797.379	5.5532_797.3793	0	0	0	0	0	0.9202	0.6423	0.6343	1.2044	0.5279	0	0	0	0	0	1.2323	0.7448	1.052	0.7891	0.6768	0	0	0	0	0	3.3116	8.0103	5.3944	6.342	3.8214	0	0	0	0	0.2825	0.6491	0.782	1.0672	2.4179	1.9932
Negative	3.4601	799.198	3.4601_799.1984	12.7725	11.0055	10.0269	15.7029	15.9993	0	0	3.989	0	0	6.8556	6.3545	7.6821	4.0943	6.1868	0	0	0	0	0	0	0	0	0	0	0	0	0	0	0	0	0	0	0	0	0	0	0	0	0
Negative	3.4559	799.213	3.4559_799.2127	12.7725	11.0055	10.0269	15.7029	15.9993	5.9289	3.502	3.989	4.5351	2.2335	6.8556	6.3545	7.6821	4.0944	6.1868	1.9367	3.2813	2.5754	1.6524	1.5047	0	0	0	0	0	0	0	0	0	0	0	0	0	0	0	0	0	0	0	0
Negative	3.3431	799.229	3.3431_799.2285	0	0	0	0	0	3.129	0	2.2884	0	1.6314	0	2.8953	0	4.0944	0	0	2.2786	2.5754	2.6476	1.4296	0	0	0	0	0	0	0.9977	0	0	1.015	0	0	0	0	0	0.9417	0.9345	0.9314	1.0522	0.6625
Negative	1.8248	799.232	1.8248_799.232	0	0	0	0	0	0.5522	0	0	0	0	0	0.1196	0	0	0	0.4157	1.4327	0.8235	0.7878	0.6209	0	0	0	0	0	0.3711	5.8795	6.1531	3.8735	0.2881	0	0	0	0	0	0.6671	0	0	0.8193	0
Negative	3.3828	799.313	3.3828_799.3135	0	0	0	0	0	0	1.9437	2.9062	1.839	1.5346	0	0	0	0	0	0	0	0.2655	0.1863	0.6664	0	0	0	0	0	0	0	0	0	0	0	0.2225	0	0	0.2076	0	0	0	0	0.705
Negative	3.0698	799.329	3.0698_799.3291	0	0	0	0	0	0.6828	2.2256	2.3439	0.6095	0.8125	0	0	0.2582	0	0	0	0	0	0	0	0	0	0	0	0	0.4721	0	0.4987	1.1694	1.899	0	0	0	0	0	0	0	0	0	0
Negative	3.3811	799.332	3.3811_799.3315	0	0	0	0	0	0	1.9437	2.9062	1.839	2.1667	0	0	0	0.1716	0	0.2257	0	0.4204	0.1863	0.6664	0	0	0	0	0	0	0	0	0	0	0	0.2225	0	0	0	0	0	0	0	1.2287
Negative	4.7192	799.373	4.7192_799.3732	0	0	0	0	0.3727	0	0	0	0	0	0.5104	0	0	0	0	0	0	0	0	0	0	0	0	0	0	2.2777	3.9893	3.6021	4.5056	4.3941	0.1739	0	0	0	0	0	0	0	0	0
Negative	2.1019	800.129	2.1019_800.1292	1.0015	0.6266	0.388	0.3015	0.6243	0	0	0	0	0	3.2957	2.1167	3.904	2.0105	2.1297	0	0	0	0	0	3.3835	2.163	3.2409	3.8549	2.7615	0	0	0	0	0.2415	0.3691	0.2666	0.2525	0	0	0	0	0	0	0.1047
Negative	0.4546	800.606	0.4546_800.6065	0.5451	0	6.8003	2.9421	0	0	0	0	0.043	0	3.3441	0.2698	0	2.7948	0	0	0	0	0	0	1.3704	0	0	0	1.5623	0	0	0	0.0472	0	0	0	0.2396	0.8189	0.6397	0	0	0	0	0
Negative	0.4615	800.643	0.4615_800.6425	3.0534	4.553	1.8057	2.9421	2.9513	0	0	0	0	0	0	0.5738	1.9305	2.7948	0.9878	0	0	0	0	0	1.3704	1.3839	2.2509	2.894	1.5623	0.0418	0	0	0	0	0.6563	0.3202	0	0.8189	0.6397	0	0	0	0	0
Negative	3.0048	801.208	3.0048_801.2076	0	0	0	0	0	1.0434	1.2763	0	1.0778	0.516	0	0	0	0	0	0	0	0	0	0	0	0	0	0	0	0.2845	1.486	3.463	2.6975	0	0	0	0	0	0	0	0	0	0.5028	0.5638
Negative	1.6924	801.215	1.6924_801.2149	0	0	0	0	0	1.5899	0	0	2.404	0.9922	0	0	0.2521	0	0	0	0	0	0	0	0	0	0	0	0	0	0	0	0	0	0	0	0	0.2287	0	0	0	0	0	0
Negative	3.0293	801.237	3.0293_801.2375	1.0793	1.1978	1.1153	0	0	0	0	0.7806	0	0	0.8453	1.0353	1.2716	0.4063	0.6565	0	0	0	0	0	3.4723	3.5051	2.2358	1.7254	3.5094	0	0	0	0	0.8067	4.4484	4.5486	6.1152	4.3321	3.284	0	0	0	0	0
Negative	2.9905	801.255	2.9905_801.2547	0	0	0	0	0	0	0.6303	0.5326	0	0	0	0	0	0	0	0	0	0	0	0	0	3.5051	0	0	3.5094	0	1.8654	2.6745	3.7006	0	4.4484	4.5486	6.1152	4.3321	0	2.8659	0	0	0	0
Negative	2.871	303.09	2.871_303.0898	0	0	0	0	0	0	0	0	6.1239	0	0	0	0	0	0	0	2.072	0	2.0583	0	0	0	0	0	0	7.7245	0	0	0	7.9149	0	0	0	0	0	0	0	0	5.1411	0
Negative	2.9677	303.09	2.9677_303.0899	0	0	0	0	0	0	0	0	7.2943	0	0	0	0	0	0	9.4373	4.5339	0	2.2258	0	0	0	0	0	0	0	0	0	5.1059	8.3753	0	0	0	0	0	0	4.9637	3.7217	5.4879	6.7018
Negative	3.2244	303.09	3.2244_303.0901	16.8916	19.9356	26.0942	36.8812	22.8306	31.8715	19.477	31.4276	0	0.1116	10.4962	5.8553	8.91	11.7086	7.8982	40.8619	21.4474	10.9292	15.0651	0	9.9429	29.9273	7.1533	26.0548	10.2041	24.9922	2.4094	3.0113	5.8127	0	0.8573	1.811	0	1.9494	0	2.4737	4.4202	9.9493	0	0
Negative	2.7765	303.09	2.7765_303.0903	0	0	0	0	0	0	0	0	0	0	0	0	0	0	0	0	0	0	0	0	0	0	0	0	0	0	0	0.0842	0	4.4275	0	0	0	0	0	0	0.7639	0	0	2.8449
Negative	0.4397	303.913	0.4397_303.913	0.8825	1.0344	1.1455	0.7488	0.8976	0.918	1.0792	0	1.3911	1.6157	1.2331	1.0706	0.645	1.6857	1.7751	1.5825	0	0.7623	1.9617	1.0679	0	0.5911	0	0.9784	1.2195	1.1176	1.5861	0.9375	1.3559	1.0498	0	0.8964	0	0.8485	0.8913	0.4072	0.6241	0.5805	1.0192	1.3615
Negative	0.4299	304.913	0.4299_304.9127	7.1189	5.1395	6.7586	1.9969	4.2414	11.4374	5.8346	4.2243	13.7823	11.9108	13.9303	7.9991	13.09	14.672	10.1906	5.8648	7.1531	5.848	4.7374	5.6143	14.0393	8.645	17.8434	11.1458	11.7613	6.4358	4.4079	3.58	6.1276	6.0568	7.7826	12.6903	13.5852	13.7264	16.859	14.0398	11.9082	5.0243	5.1796	2.3288
Negative	0.5165	304.998	0.5165_304.9984	0	0	0	0	0	1.1092	0	0.3413	0.9023	0.715	0	0	0	0	0	1.378	0.4913	0.7553	0.6512	1.2009	0	0	0	0	0	2.5135	0.6811	0.6379	0	2.3665	0	0	0	0	0	0.5575	0.7748	0.7761	0	0
Negative	2.4782	305.103	2.4782_305.1033	0	0	0	0	0	49.2225	68.3151	75.4168	38.0051	55.4896	0	0	0	0	0	30.8053	21.9798	15.1849	18.1227	12.6283	0	0	0	0	0	32.4181	0	8.111	9.2215	28.1533	0	0	0	0	10.2147	20.9465	43.0125	31.8215	39.2037	0
Negative	2.3823	305.104	2.3823_305.1041	0	0	0	0	0	0	0	0	27.3702	0	0	0	0	0	0	0	11.9319	0	5.3643	2.6219	0	0	0	0	0	0	0	0	0	27.963	0	0	0	0	0	4.9371	38.7267	7.57	39.9582	61.82
Negative	2.6579	305.104	2.6579_305.1044	0	0	0	0	0	49.5759	50.4012	50.433	39.6767	98.9324	0	0	0	0	0	29.3035	26.1465	17.729	18.9116	0	0	10.9593	4.7935	0	0	63.9356	6.9983	9.8512	0	27.0715	0	0	0	0	0	6.3564	17.3076	14.8216	23.1605	21.8224
Negative	2.7807	305.105	2.7807_305.1049	166.31	255.45	309.413	268.859	134.265	224.935	815.679	831.577	258.487	474.621	112.208	115.389	68.5899	168.14	97.842	220.447	91.0801	76.0855	82.2965	54.0161	61.0733	162.896	31.0233	112.839	68.596	145.12	16.5178	24.7605	40.9102	191.435	10.5781	17.6378	9.2599	16.534	12.385	38.4305	78.1609	63.1677	91.2766	67.6263
Negative	1.4686	305.116	1.4686_305.1162	0	0	0	0	0	0	2.6518	3.3712	0	0	0	0	0	0	0	0	0	2.6583	2.0042	0	0	0	0	0	0	0	0	0	0	0	0	0	0	0	0	0	0	0	0	0
Negative	0.5246	306.072	0.5246_306.072	3.4591	4.4139	3.473	4.1697	2.6269	0	0	1.5376	1.841	0	3.4406	1.9018	4.0532	3.2076	3.7472	0	1.0837	0	0.6765	0	4.3438	3.8098	4.5062	2.4522	4.1633	0	0	0.5919	0.6938	0	3.8338	4.9053	7.68	8.6661	7.3085	0.9574	0.9692	0	0.6476	0.9782
Negative	2.2929	306.077	2.2929_306.0771	6.0896	5.1584	5.6368	3.9185	5.2577	1.7897	7.5832	0	3.2499	3.0676	5.7841	7.0079	3.4975	4.4718	3.8642	0	3.7443	1.1556	0	0	0	0	0	0	3.3697	0	0	0.4401	0	0	1.6161	2.1766	1.2306	1.3846	0	1.0749	2.5652	2.8166	3.664	5.8248
Negative	0.6925	306.078	0.6925_306.0782	0	3.3773	0	0	0	0	0	2.1394	2.2088	0	0	0	0	0	0	0	0	0	1.1	1.276	0	3.3974	0	0	0	0	0	0	1.0478	0	0	0	0	0	0	0	1.4571	0.882	0.9096	1.804
Negative	2.1711	306.078	2.1711_306.0783	0	1.1425	1.2117	0	0	2.134	7.6545	0	1.9797	2.1459	0	3.4402	1.4402	0	0	0	3.9965	1.9174	0	0.3758	0	0	0	0	0	2.2358	0	0	0	1.8389	0	0	0	0	0	0.9998	0	2.9535	3.221	4.3124
Negative	2.9685	801.29	2.9685_801.2904	0	0	0	0	0	0	0.6303	1.0019	0	0	0	0	0	0	0	0	0	0	0	0.4984	0	0	0.2477	0	0	0.6011	0.7781	0	3.7006	1.9337	0	0	0.2743	0	0.2615	0	0	0	0	0
Negative	3.0657	801.352	3.0657_801.3519	0	0	0	0.0795	0	0.1969	1.4552	1.622	0	0.515	0	0	0	0	0	0	0	0	0	0	0	0	0	0	0	0.2493	1.4591	1.7042	3.8204	0.8995	0	0	0	0	0	0	0	0	0	0
Negative	6.8336	801.356	6.8336_801.356	0	0	0	0	0	0.4817	0	0	0.5158	0.4592	0	0	0	0	0	0	0	0	1.6284	0	0	0	0	0	0	0	0	1.0147	0	0	0	0	0	0	0	0	0	0.6082	2.3344	0.7973
Negative	3.208	803.371	3.208_803.3709	0	0	0	0	0	0.6935	1.7577	2.7282	1.5846	1.7345	0	3.0851	0	0	0	4.4844	8.3008	18.827	1.9405	13.8018	13.1761	0	0	0	0	0	23.9932	27.5104	35.8806	0	0	0	0	0	0	0	0.1201	0	0	0
Negative	3.0996	803.372	3.0996_803.3724	0	0	0	0	0	0	0	0	0	0	0	0	0	0	0	0	0	1.6665	0	0.8058	0	0	0	0	0	0	2.7437	2.84	4.3014	0	0	0	0	0	0	0	0	0	0	0
Negative	2.9588	803.376	2.9588_803.3764	0	0	0	0	0	0	0	0	0	0	0	0	0	0	0	3.7402	0	0	1.8256	0	0	0	0	0	0	1.1963	0	0	0	3.588	0	0	0	0	0	0.1644	0.166	0	0	0
Negative	7.7491	803.404	7.7491_803.4042	2.0381	1.0972	0	0	1.6326	0	0	0	0	0	0	2.3059	0	0	1.9414	0	5.4372	3.1151	0	0	0	0	0.5651	0	0	0	0	0	0	0	1.0041	1.2551	0	0	0	0.8187	0	0	0	0
Negative	7.8994	803.406	7.8994_803.4061	2.8947	2.4782	3.571	0	2.7303	0	0	0	2.3617	1.5132	0	2.6291	2.0908	0	2.9119	0	9.4086	6.7799	0	3.1325	0	0	0	0	0	0	0	0	0	0	1.6301	2.1932	0	0	2.1659	1.4396	3.4234	0	3.9091	1.683
Negative	6.9566	803.408	6.9566_803.4082	0	0	0	0	0	1.6345	2.9842	0	0	1.79	0	0	0	0	0	0	2.6466	3.0929	0	0	0	0	0	0	0	0	0	0	0	0	0	0	0	0	0	0	0	0	0	0
Negative	5.8876	805.332	5.8876_805.3321	0	0	0	0	0	0	0	0.4196	0	0	0	0	0	0	0	0	0	0	0	0	0	0	0.1636	0	0	5.0372	0	0	0	1.0844	0	0	0	0	0	0.6269	3.0651	0	0	0
Negative	4.9487	805.333	4.9487_805.3326	0	0	0	0	0	0	0	0.5428	0	0	0	0	0	0	0	2.1208	2.2624	2.816	0.7366	0.8225	0	0	0.3643	0	0	0	0	0.4474	0	0	0	0.391	0	0	0	0	0	0	0	0
Negative	5.0859	805.334	5.0859_805.334	0	0.167	0	0	0	0	0	0	0	0	0	0	0	0	0	0	0	0	0	0	0	0	0	0	0	0	0	0	0	0	0	0	0	0	0	2.6188	3.173	0.2147	2.935	0.342
Negative	3.8235	805.345	3.8235_805.3446	0	0	0	0	0	1.5422	0.5304	0.9322	1.0651	1.4553	0	0	0	0	0	0	0.5104	1.2189	0.3548	0.3572	0	0	0	0	0	0.278	0	0.2279	0	0.3032	0	0	0	0	0	0.3354	0	0.3677	1.0156	0.4983
Negative	7.1686	807.438	7.1686_807.4381	1.8065	4.3377	1.936	2.1001	1.8051	0	0.1791	0	0	0.4448	1.6624	0.5391	0.9572	1.7403	0.4677	0	0	0	0	0	1.0663	0.8713	0.3155	0.6527	4.691	0	0	0	0	0	5.7463	3.8595	3.7192	5.1009	3.2751	0.5609	0	3.3838	0	7.5892
Negative	6.7731	809.287	6.7731_809.287	0	0	0	0	0	1.5014	0.6791	0.4117	0.2573	0.2866	0	0.1855	0	0	0	0.6776	0.6597	0.6438	2.3107	1.9783	0	0	0	0	0	0.7412	1.2259	1.7284	0.5706	0.8403	0	0	0.3836	0	0	0.4257	0.2725	1.1359	0.8741	0.2886
Negative	3.2339	809.342	3.2339_809.3422	0	0	0	0	0	2.4317	1.1653	0	3.1795	1.7186	0	0	0	0	0	8.9141	6.6678	6.2739	5.7572	3.0586	0	0	0	0	0	0	0	0	0	0	0	0	0.2004	0	0	0	0	0.771	0	0
Negative	2.0666	306.078	2.0666_306.0783	0	0	0	0	0	1.7047	5.6776	1.8366	1.7195	2.326	0	0	0	0	0	0	3.5341	1.5746	0	0	0	0	0	0	0	1.8489	0	0	0	0	0	0	0	0	0	1.1724	0	2.8967	0	0
Negative	0.5825	307.059	0.5825_307.059	0.6409	0	0	0.62	0	0	0.9564	0	0	0	0	0	0	0	1.2083	5.5287	2.3693	2.3534	2.2236	1.8536	0.6758	0	0	0.5944	0	1.9903	1.807	1.9736	1.6723	0	0	0	0	0	0	1.0638	0	0	0.2792	0.5254
Negative	0.6795	307.074	0.6795_307.0743	0	1.2096	0	1.1897	1.0365	0	0	0	0	0	0	1.5504	0	0.6976	3.2589	2.1716	0	0	0	0	0.957	2.3687	0	0	1.2927	2.0984	1.807	0	0	1.7857	0	0	0	0	0	0	0	0	0	0
Negative	0.5304	307.085	0.5304_307.0852	2.0605	1.1471	1.2501	1.815	1.9106	0	0	0	0	0	0	2.3705	1.8135	1.6066	2.9828	1.9586	0	0	0.6973	0	0	1.7875	1.4114	1.9045	0	1.7033	0	1.683	0	1.736	1.3152	1.5792	2.2025	1.4483	2.1476	0	0	0.5151	0	0
Negative	2.332	307.104	2.332_307.1041	0	0	0	0	0	0	0	0	0	0	0	0	0	0	0	0	0	0	0	0	0	0	0	0	0	2.289	0	0	0	2.1621	0	0	0	0	0	0	0	0	0	0
Negative	2.4909	307.107	2.4909_307.1071	0	0	0	0	0	4.2364	6.2656	6.7303	3.8753	5.418	0	0	0	0	0	2.7342	0	0	0	0	0	0	0	0	0	3.0226	0	0	0	2.8088	0	0	0	0	0	0	0	0	0	2.3101
Negative	2.6293	307.109	2.6293_307.1088	0	0	0	0	0	0	0	0	0	0	0	0	0	0	0	0	0	0	0	0	0	0	0	0	0	2.2194	0	0	0	2.1377	0	0	0	0	0	0	0	0	0	0
Negative	2.8404	307.14	2.8404_307.1397	0	0	3.3009	2.0946	1.7476	1.7391	3.0152	3.7939	0	0	0	1.7734	1.0689	1.3553	0	1.8331	2.023	1.7373	0	0.5909	1.6103	2.4637	0	2.1097	1.5236	0	1.7552	1.7175	2.2842	0	0.9989	1.0986	1.1142	1.5769	0.9417	0	2.7113	2.5615	0	0
Negative	3.0321	307.14	3.0321_307.1398	0	0	0	0	0	0	0	0	0	0	0	0	0	0	0	2.2584	0	1.2265	1.8251	0.8951	0	0	0	0	0	0	0.8063	0.7982	0	0	0	0	0	0	0	0	0	0	0	0
Negative	2.7477	309.079	2.7477_309.0786	0	0	0	0	0	0	6.5276	7.5303	1.0534	2.9105	0	0	0	0	0	0	0	0.6214	0.3927	0.4521	0	0	0	0	0	0	0	0	0	0	0	0	0	0	0	0	0	0	0	0
Negative	1.1283	309.118	1.1283_309.1179	0	0	0	0	0	0	1.4425	1.523	0.5426	0.5865	0	0	0	0	0	0.5903	1.7491	1.9223	0.9511	1.6532	0	0	0	0	0	1.1934	0	0	1.6769	1.6227	0	0	0	0	0	0.9384	0.8181	0.6506	0.7355	0
Negative	1.4075	309.118	1.4075_309.1179	3.1812	4.4076	6.2624	7.6835	3.5308	0.9611	2.439	3.4043	1.5235	1.6952	3.7918	5.0939	1.9332	0	2.5812	4.4151	5.6337	5.0928	3.2772	3.5787	0	0	0	0	3.6835	2.6307	0	0	0	2.4965	0	0	0	0	0	0	0	0	0.6605	0
Negative	0.8661	309.118	0.8661_309.118	0	0	0	0	0	0.9172	0	0	0	1.0996	1.2995	0	0	1.3773	2.2327	1.4789	1.2422	0	0	2.4396	0	0	1.1546	0	0	1.1718	2.0845	2.3869	3.377	1.9207	0	0	0	0	0	0.9613	1.4009	0.9137	1.0132	0
Negative	7.2473	309.171	7.2473_309.171	0	0	0	0	0	0	1.577	1.4521	0	1.1734	0	0	0	0	0	0	1.7552	1.2771	2.5	1.9895	0	0	0	0	0	0	1.0281	0	0	1.4689	0	0	0	0	0	2.1455	1.9192	1.0828	1.5302	1.0492
Negative	8.4053	309.173	8.4053_309.1729	0	0	0	0	0	0	0	0	0	6.8505	0	0	0	0	0	0	0	0	0	0	0	0	0	0	0	0	0	0	0	7.4406	0	0	0	0	0	0	0	0	0	7.7655
Negative	8.7007	309.173	8.7007_309.1735	4.2682	0	3.8385	0	2.5873	0	0	0	16.318	0	5.2109	0	0	5.7743	2.4793	0	0	0	5.026	0	0	2.7973	4.1069	3.637	0	0	0	0	0	2.4043	3.8318	3.3826	3.5162	4.9101	6.8114	0	0	0	11.4339	0
Negative	3.1266	809.344	3.1266_809.3438	0	0	0	0	0	15.5625	4.1306	6.4093	10.7285	10.6994	0	0	0	0	0	25.6759	21.6994	21.3559	20.9939	10.1597	0	0	0	0	0	0	2.2064	2.1504	1.3166	0.7585	0.1017	0.2343	0	0	0	0	0.4671	2.6621	0	0
Negative	3.6321	811.268	3.6321_811.2675	0	0	0	0	0	1.8163	0	1.9527	0	0	0	2.5324	0	0	0	0	0	0.689	0.6939	0	0	0	0	0	0	0	2.1237	2.2506	2.6358	0	3.5496	2.7467	5.0523	0	0	3.1029	0	0	2.2898	0
Negative	1.8117	813.243	1.8117_813.2428	0.4648	0.3007	0	0.4368	0.2857	0	0	0	0	0	0.4596	0	0.5833	0	0	0	0	0.5129	1.9443	0.5434	0.3784	0.2612	0	0	0	1.8729	1.942	1.842	1.4392	1.3349	0	0	0.1671	0	0.2354	0	0	0	0	0.1963
Negative	2.9655	813.247	2.9655_813.2473	0	0	0	0	0	0.5118	0	0	0	0	0	0	0	0	0	0	0	0	0	0	0	0	0	1.6481	0	0.3883	1.6922	2.15	2.3759	0	0	0	0	0	0	0	0.4201	0	0	0
Negative	2.6081	815.205	2.6081_815.2047	0	0	0	0	0	0.703	0.5029	0	1.4603	0.6581	0	0	0	0	0	0.7992	1.9262	0.6439	1.3232	1.2586	0	0	0	0	0	1.8832	4.1454	2.9109	4.2229	1.9943	0	0	0	0	0	0.5622	0.737	0.7518	0.4678	0.5336
Negative	2.0856	815.206	2.0856_815.2064	0	0	0	0	0	0	0	0	1.1303	0.3487	0	0	0	0	0	1.0583	3.0304	0.5607	2.3897	1.3417	0	0	0	0	0	0	0	0	0	0	0	0	0	0	0	0	0.6828	0.47	0.9357	0.4423
Negative	4.7524	817.228	4.7524_817.2283	0	0	0	0	0	0	0	0	0.321	0.3842	0	0	0	0	0	0.6331	0.7605	1.9387	0	1.2623	0	0	0	0	0	0.1609	0	0	0	0	0	0	0	0	0	0	0	0	0	0
Negative	5.5202	817.347	5.5202_817.3473	0	0	0	0	0	0	0	0	1.2718	2.824	0	0	0	0	0	0	1.4261	3.7274	1.8505	4.5838	0	0	0	0	0	0	0	1.8013	0	0	0	0	0	0	0	0	0	0	2.2991	2.4226
Negative	5.2456	817.349	5.2456_817.3487	0	0	0	0	0	2.6316	0	0	2.6688	4.0341	0	0	0	0	0.8255	2.9397	5.476	7.6871	7.7218	5.9065	0	0	0	0	0.6981	2.2509	1.6688	3.4321	1.3592	0	0	0	0	0	0	1.531	0.563	2.1098	5.9054	2.7605
Negative	5.3298	817.349	5.3298_817.3489	0.296	0.5332	0	0	0.5432	0	0	0	1.0683	1.8296	3.4132	0	0	0	0	1.9189	2.5779	3.3879	4.5697	3.6485	0	2.8361	0	0	0	0	0	3.8576	0	0	0	0.663	0	0	0.565	0	0	0	2.5661	1.9844
Negative	3.0047	817.426	3.0047_817.4257	0	0.2217	0	0	0	0.3629	0	0.4901	0.297	0.3029	0	0	0	0	0	0.5086	0.9904	1.909	0.375	1.3851	0	0	0	0	0	0.1688	0.3829	0.5066	0.5848	0.4059	0	0	0	0	0	0.4471	0.4866	0.5382	0.7433	0.9812
Negative	2.7313	819.199	2.7313_819.1994	0	0	0	0	0	0.6521	0.3729	0	0	0	0	0	0	0	0	1.0261	1.1632	1.6964	0	1.546	0	0	0	0	0	0	1.44	1.7081	1.8564	0	0	0	0	0	0	0	0	0	0	0
Negative	5.6308	819.236	5.6308_819.2356	0	0	0	0	0	3.2826	1.1608	1.2997	3.5708	3.4155	3.1595	3.2214	10.4275	0	5.2246	7.3636	4.699	2.6556	5.0416	2.8087	0	0	0	3.5993	0	1.8239	6.1799	4.5388	2.3574	2.5057	0	0	0	0	0	4.314	3.8547	1.377	5.0241	2.5781
Negative	6.1066	821.381	6.1066_821.381	0	0	0	0	0	0	0	0	0	0	0	0	0	0	0	1.4977	0	0	0	0	0	0	0	0	0	8.4224	0	0	0	3.0849	0	0	0.2807	0	0	0	1.0848	0	0	0
Negative	5.93	821.383	5.93_821.3829	0	0	0	0	0	1.1643	0	0	1.3156	1.8289	0	0	0	0	0	5.7852	4.803	6.4476	6.3216	5.1178	0	0	0	0	0	0	0	1.2752	0	0	0	0	0	0	0	0	0	0	0	0
Negative	4.7078	823.265	4.7078_823.2654	0	0	0	3.5541	0	3.1461	2.253	1.3149	3.3277	6.4829	0	0	0	0	0	1.2444	2.4467	3.6335	1.2286	2.4171	0	0	0	0	0	1.1693	2.4706	3.0552	0.8257	2.0433	9.2625	9.7508	4.7317	9.4103	5.1955	6.0242	11.2961	23.9197	26.9816	22.9933
Negative	8.2607	309.184	8.2607_309.1841	0	0	0	0	0	0	0	0	0	5.0588	0	0	0	0	0	0	0	0	0	0	0	0	0	0	0	0	0	0	0	0	0	0	0	0	0	0	0	0	0	5.1057
Negative	8.5234	309.204	8.5234_309.2039	7.172	0	3.7478	4.4786	6.4268	36.1959	20.8689	7.113	3.301	17.8319	0	5.0243	0	0	3.4271	32.7665	20.0116	40.8935	181.962	46.7243	0	0	0	3.9463	0	2.5651	39.5516	48.2803	24.1891	19.4664	0	0	0	0	2.0119	2.1022	6.1177	25.8747	4.0016	10.4849
Negative	7.7307	309.204	7.7307_309.2045	0	0	0	0	0	0	0	5.1829	0	0	0	0	0	0	0	5.8173	0	6.9747	42.2488	13.8734	0	0	0	0	0	0	7.6683	7.8935	0	0	0	0	0	0	0	0	0	4.4404	0	0
Negative	8.6576	309.205	8.6576_309.2046	0	0	0	0	0	0	0	0	0	0	0	0	0	0	0	2.5251	0	0	9.0404	3.0933	0	0	0	0	0	0	0	0	0	0	0	0	0	0	0	0	0	0	0	0
Negative	7.6412	309.205	7.6412_309.2047	0	0	0	0	0	0	0	0	0	0	0	3.89	0	0	0	0	1.6634	0	34.4948	0.2271	0	0	0	0	0	0	0	0.3882	0	0	0	0	0	0	0	0	0	0	0	0
Negative	8.1949	309.205	8.1949_309.2049	0	0	0	0	0	0	0	0	0	0	0	0	0	0	0	4.3029	3.9083	4.6674	22.6815	6.8849	0	0	0	0	0	0	0	0	0	0	0	0	0	0	0	0	0	2.612	0	0
Negative	7.972	309.205	7.972_309.205	0	0	0	0	0	0	0	0	0	0	0	0	0	0	0	1.9517	0	3.3582	17.5614	5.2272	0	0	0	0	0	0	0	3.3629	0	0	0	0	0	0	0	0	0	0	0	0
Negative	7.845	309.205	7.845_309.2053	4.1648	3.0533	2.6099	0	3.0408	0	0	0	0	0	0	5.6405	0	0	1.5157	5.2539	3.1146	3.8617	36.3717	5.2542	0	0	0	0	0	0	0	2.3035	0	0	0	0	0	0	0	0	0	3.0454	0	0
Negative	7.0174	309.206	7.0174_309.2059	0	0	0	0	0	0	0	0	0	0	0	0	0	0	0	0	0	1.9368	8.1774	0	0	0	0	0	0	0	6.8119	9.2171	3.4232	0	0	0	0	0	0	0	0	0	0	0
Negative	0.4543	310.929	0.4543_310.9287	1.5125	0.7783	1.328	1.0917	1.7568	0	0	0	0	0	1.2842	0	1.604	1.1378	2.4351	0	0	0	0	0	2.0924	3.8721	1.2185	3.1181	2.9735	1.8037	0	2.0623	2.2787	2.0408	3.1573	4.9239	3.6623	2.7308	3.9547	0	0	1.965	0	0
Negative	3.0698	311.058	3.0698_311.0577	9.0763	8.3501	9.121	9.9973	8.4248	0	0	0	2.0976	1.5687	4.4562	3.4789	4.2798	4.8698	4.4183	0	0	0	0	0	0	0	1.9935	0	1.8558	0	0	0	0	0	12.297	13.2439	14.0477	17.2661	13.29	6.0112	4.0334	3.7438	3.0395	0
Negative	1.4191	311.081	1.4191_311.0808	2.5659	4.2027	4.2566	5.1404	3.394	0.7708	0	1.6545	0.7244	0.6877	2.154	3.8191	2.7136	1.7707	1.2288	0	0	1.256	0.7308	0.8144	4.0065	4.1296	4.2406	5.001	5.4658	1.7853	1.4175	1.2228	0.9788	2.4377	2.5768	2.7717	2.0792	4.1528	1.7844	0.458	0.947	2.7051	0	0.8917
Negative	3.0418	311.086	3.0418_311.0861	0	0	0	0	0	1.4199	1.5287	0	2.0976	1.5687	0	0	0	0	0	0	4.2552	0	3.0636	0	0	0	0	0	0	0	0	0	1.6328	0	0	0	0	0	0	0	3.2579	3.7438	0	0
Negative	3.0721	311.113	3.0721_311.1133	0	0	0	0	0	3.5838	1.7114	2.1953	4.0786	3.2035	3.406	2.9468	4.0322	4.9839	3.9961	24.8282	14.7568	17.4898	13.8654	10.8285	0	2.3875	0	0	0	2.1082	5.0504	8.1238	4.4968	3.0432	0	0	0	0	0	3.7908	2.9751	4.6223	4.8907	1.7614
Negative	2.8898	311.114	2.8898_311.1141	0	0	0	0	0	0	0	0	0	0	0	0	0	0	0	4.256	2.6437	3.1725	1.6815	2.2481	0	0	0	0	0	0	1.1067	1.5459	1.2472	0.801	0	0	0	0	0	0	0	0	0	0
Negative	8.6219	311.166	8.6219_311.1659	0	4.7848	0	6.0691	5.6011	6.3867	4.7772	2.6594	23.2097	6.2203	0	5.6224	8.0002	9.45	3.6701	0	0	0	15.8995	13.5845	0	5.5653	7.5872	0	0	0	0	0	0	20.7989	7.1403	5.7256	6.9896	0	11.477	6.9407	0	3.9676	15.8114	6.721
Negative	5.6548	823.355	5.6548_823.3547	0	0	0	0	0	4.0954	0.4683	0.5893	1.0221	2.5555	0	0	0	0	0	0.4802	0.6493	0	0.878	1.2791	0	0	0	0	0	0	0.5499	0.6099	0.2589	0.5794	0	0	0	0	0	0	0	1.754	0.516	0.8599
Negative	5.8478	823.397	5.8478_823.3974	0	0	0	0.3398	0	0.5216	0	0	0.4395	0.788	0	0	0	0	0	3.3884	1.8277	3.8703	2.755	2.1869	0	0	0	0	0	0	0	0	0	0	0	0	0	0	0	0	0	0	0	0
Negative	6.0628	823.398	6.0628_823.3984	0.5383	0	0	0	0	0	1.6049	0	0	0	0	0	0	0.2203	0	3.0992	0	0	0	0	0	0	0	0	0	13.4747	1.4493	1.6025	1.5703	4.2208	0	0	0	0	0	0.894	2.0915	1.2867	2.3527	1.7076
Negative	2.466	827.224	2.466_827.2241	8.5313	5.625	4.9235	11.5407	11.8963	1.8107	0	0	3.4899	3.5378	4.7359	6.9519	4.4095	2.9969	7.0441	0	0	0	0	1.2606	0.9284	1.3333	1.3737	1.534	0	0	0	0	0	0	4.5697	4.5847	3.4376	2.3928	2.9199	0	2.5754	0	2.2038	0
Negative	2.1596	827.227	2.1596_827.2269	3.6946	4.0939	0	4.5718	5.9405	0	0	0	0	0	0	0	0	0	0	0	0	0	0	0	0	0	0	0.8491	0.7128	0	0	0	0	0	6.8618	7.4165	4.376	5.6595	0	0	0	0	4.2395	2.3294
Negative	3.5137	827.243	3.5137_827.2434	0	0	0	0	0	0	0	0	0	0	0	0	0	0	0	0	0.6081	0	0	0	0	0	0	0	0	1.3059	0	0	0	4.7492	0	0	0	0	0	0	0	0	5.2691	0
Negative	5.7161	827.252	5.7161_827.2516	0	0	0	0	0	4.5989	5.5619	5.581	0	10.8646	0	0	0	0	0	0	0	0	0	0	0	0	0	0.214	0	0.1435	0	0	0	0	0	0	0	0	0	0	0	0	0	0
Negative	6.3255	827.252	6.3255_827.2523	0	0	0	0	0	7.259	40.7982	32.415	1.9534	30.6761	0	0	0	0	0	0	0	0	0	0	0	0	0	0	0	0	0	0	0	0.2605	0	0	0	0	0	0.1716	1.4509	0	0.9699	0
Negative	6.2358	827.253	6.2358_827.2527	0	0	0	0	0	0	11.7573	8.5747	0	0	0	0	0	0	0	0	0	0	0	0	0	0	0.1617	0	0	0	0	0	0	0	0	0	0	0	0	0	0.4006	0	0	0
Negative	6.4369	827.254	6.4369_827.254	0.5317	0.5847	1.9263	1.054	1.1017	3.4057	17.2977	16.1742	1.0197	22.8241	0	1.1278	0	0	0	0.2215	0.0918	0	0	0.0851	0	0	0	0	0	0	0	0	0.0567	0	0	0	0	0	0	0	0.5048	0	0	0
Negative	0.4753	827.262	0.4753_827.2616	0	0	0.2965	0.1928	0.3636	0.4064	0	0	0.4884	0.675	0.9265	1.2813	4.1255	5.391	0.1903	0	0	0.069	0	0.345	0	0.2527	4.4858	1.2023	0.162	0	0	0.2036	0.2288	0.1014	4.1485	1.4676	2.0892	3.1476	0.8835	3.5637	1.4961	0.9855	0	1.0855
Negative	6.5786	827.262	6.5786_827.2621	0	0	0	0	0	0	2.7696	0	0	3.2861	0	0	0	0	0	0	0	0	0	0	0	0	0	0.1223	0	0	0	0	0	0	0	0	0	0	0	0	0	0	0	0
Negative	2.967	827.263	2.967_827.2626	2.6631	4.3174	1.7855	2.8557	3.5614	0	0	0	0	2.5223	4.9469	0	3.6671	1.8678	0	0	0	0	0	0	4.286	0	2.4355	1.8909	2.7865	0	0	0	0	0	0	0	0	0	0	0	0	0	0	0
Negative	3.3933	827.264	3.3933_827.2636	2.7577	0	0	0	0	3.2321	2.5757	2.4089	3.0683	0	0	5.1417	4.9624	0	3.2251	2.098	2.1966	0	0	1.7435	7.5819	5.4741	4.0103	3.4501	4.0878	2.6532	7.2234	8.5518	7.291	5.6602	6.7547	7.5872	13.5866	5.4314	4.9826	10.6348	4.4023	3.008	5.5186	3.4697
Negative	3.4032	827.29	3.4032_827.2899	0	0	0	0	0	0	0	0	0	0	0	3.443	0	0	3.0325	0	0	0	0	0	7.5819	0	4.0103	0	0	2.9393	0	0	0	5.6602	0	0	8.4474	0	0	0	0	0	0	0
Negative	3.9428	829.219	3.9428_829.219	0	0	0	0	0	2.0836	0.6698	0	2.8514	1.3411	0	0	0	0	0	0.7561	1.393	0.8758	1.5016	1.755	0	0	0	0	0	0.7462	3.7507	3.1475	4.2344	0	0	0	0	0	0	0.3305	0	0.491	0	0
Negative	8.2378	311.167	8.2378_311.1668	0	0	0	0	0	0	0	0.5121	0	33.3921	0.757	0	0	0	0	0	1.5753	0	2.5922	0	0.9717	0	0	0	0	0	0	0.806	0	0	0	0	0	0	0	0	0	0	1.9046	23.2375
Negative	8.7221	311.167	8.7221_311.167	13.4305	0	14.611	13.5008	11.6657	0	0	0	16.1689	0	15.9103	9.9055	16.2832	16.2266	7.7453	0	0	0	12.9404	0	17.9948	8.481	14.8339	15.0881	14.7546	5.7811	4.1875	2.6293	30.1008	0	12.9428	13.8126	2.9055	19.032	21.9412	5.9389	0	0	5.6324	0
Negative	8.3673	311.168	8.3673_311.1676	1.486	0	1.2985	1.476	0.7402	0	0	2.625	1.9112	15.0442	1.3045	0	1.2556	1.6528	1.0748	0	2.7769	0	2.5922	17.6987	1.6093	0	0	0	0	0	0	0.9059	0	0	1.3518	0.7609	0	1.3976	0	3.9887	2.4426	1.9369	1.9768	18.7579
Negative	7.2885	311.182	7.2885_311.182	0	0	0	0	0	4.6689	2.5211	2.1033	2.562	0	0	0	0	0	0	10.7655	0	4.8325	2.7683	2.2842	0.7981	0	0	0	0	3.0236	1.6787	0	2.3211	0	0	0.6375	0	0	0	0.8989	0	0	2.2364	0
Negative	7.9346	311.214	7.9346_311.2138	0	0	0	0	0	0	3.6198	1.1333	0	0	0.31	0.445	0	0	0.4343	0	0	3.3773	0	3.0733	0	0	0	0	0	1.1239	0	0	0	0	0	0	0	0	0	0	0	0	0	0
Negative	8.3401	311.219	8.3401_311.2189	0	0	0	0	0	0	0	0	0	0	0	0	0	0	0	0	0	5.641	14.2174	0	0	0	0	0	0	0	2.423	2.5912	0	0	0	0	0	0	0	0	0	0	0	0
Negative	6.3468	313.034	6.3468_313.0342	0	0	0	0	0	2.5606	1.0162	1.2655	2.0453	1.8178	0	0	0	0	0	0	2.8358	1.1024	0.8503	0.9866	0	0	0	0	0	1.0314	2.438	1.7821	1.8445	3.3957	0	0	0	0	0	0.598	0	3.0616	1.4595	0
Negative	1.5688	313.055	1.5688_313.055	0	0	0	0	0	0	0	0	0	0	0	0	0	0	0	0	0	0	0	0	0	0	0	0	0	0.8399	1.9092	2.101	0.471	0	0	0	0	0	0	0	0	0	0	0
Negative	2.27	313.055	2.27_313.0553	0	0	0	0	0	0	0	0	0	0	0	0	0	0	0	0	0	0	0	0	0	0	0	0	0	1.182	1.6811	1.6725	0	0	0	0	0	0	0	0	0	0	0	0
Negative	1.9166	313.056	1.9166_313.056	0	0	0	0	0	0	0	0	0	0	0	0	0	0	0	0	0	0	0	0	1.1606	0	0.6445	1.1007	0	2.4094	3.0928	4.4425	2.2718	1.7655	0	0	0	0	0	0	0	0	0	0
Negative	1.8325	313.059	1.8325_313.0592	0	0	0	0	0	0	0	0	0	0	0	0	0	0	0	0	0	0	0	0	0	0	0	0	0	2.7292	5.7968	7.1614	2.7904	0	0	0	0	0	0	0	0	0	2.6759	2.389
Negative	1.36	313.072	1.36_313.0717	0	0	0	0	0	0	1.9569	0	0	0	0	0	0	0	0	0	1.5141	0	0	1.3182	0	0	0	0	0	0	0	0	0	0	0	0	0	0	0	0	0	0	0	0
Negative	1.8211	313.083	1.8211_313.0834	0	0	0	0	0	0	0	0	0	0	0	0	0	0	0	0	0	0	0	0	0	2.5453	0	0	0	0	5.1345	0	0	0	0	0	0	0	0	1.6759	0	2.7896	2.7145	2.389
Negative	0.4931	313.112	0.4931_313.1123	1.3565	1.9278	2.1749	1.4665	1.4024	1.1557	2.1058	2.4573	2.1842	1.0887	0.8634	2.5718	0.6384	1.4686	1.3426	2.2534	1.355	1.4191	1.1264	2.0488	0.9443	1.0355	1.1938	0.8712	1.6688	1.3158	1.0732	1.1071	1.1821	1.6705	1.0261	1.4846	1.7132	1.4616	1.7224	1.2686	1.3272	1.542	1.5775	2.2687
Negative	5.465	314.05	5.465_314.0496	2.894	1.7085	2.2992	2.7719	2.6415	0	0	0	0	0.2128	2.2245	1.4256	2.2826	3.0107	3.3115	0.22	0	0	0	0	0	0	0.815	0.2255	0.3976	0	0.2191	0	0	0	1.196	0	1.0393	0.7308	0.3895	0	0	0	0	0
Negative	4.6899	315.05	4.6899_315.0505	5.0455	0	0	5.348	5.9223	3.9568	3.3134	5.4444	3.4302	2.5068	0	0	0	0	8.9379	2.9493	2.0001	5.7887	6.3839	3.7928	0	0	0	0	0	0.4029	1.4792	0	1.0865	0.6187	0	0	0	0	0	1.0237	1.2474	1.4864	0.819	1.1819
Negative	4.5591	829.22	4.5591_829.2202	0	0	0	0	0	0.1706	0	0	0.1803	0.3147	0	0	0	0	0	0.2291	0	0.1592	0	0.2129	0	0	0	0	0	0.611	2.9032	2.8854	2.7833	1.4202	0	0	0	0	0	0	0	0	0	0
Negative	2.8706	829.312	2.8706_829.312	0	0	0	0	0	0	0	0	0.4809	0.5043	0	0	0	0.257	0	3.8471	2.3362	2.0381	1.5641	2.7864	0	0	0	0	0	0	0	0	2.4595	1.5607	0	0	0	0	0	0	0	0	0.753	0.8136
Negative	2.9592	829.312	2.9592_829.3123	0	0	0	0	0	0.7921	0	0	0.6389	0	0	0	0	0	0	3.4151	2.8753	4.595	2.3087	2.7864	0	0.4317	0.591	0	0	0	0	2.6856	2.6337	0	0.4309	0	0	0	0	0	0	0	1.0795	0.6679
Negative	3.0664	829.315	3.0664_829.3146	0	0	0	0	0	3.1687	2.1795	2.7238	3.1872	3.4918	0	0	0	0	0	15.7781	13.9801	19.7237	10.6124	13.5748	0	0	0	0	0	2.3926	5.4489	8.8634	6.7205	5.3478	0	0	0	0	0	3.1131	2.5569	6.3814	8.4722	4.9004
Negative	3.8976	831.195	3.8976_831.1954	0	0	0	0.3489	0	0	0	0	0	0	0.387	0	0	0.2804	0	0	0	0	0	0.116	0	0	0	0	0	0	3.2095	2.3958	0	0	0	0	0	0	0	0	0	0	0	0
Negative	4.1372	831.197	4.1372_831.1971	0	0	0	0	0	0	0	0	0	0	0	0	0	0	0	0	0	0	0	0	0	0	0	0	0	0	3.4449	2.2669	2.6729	0	0	0	0	0	0	0	0	0	0.1607	0
Negative	8.436	831.402	8.436_831.4018	0	0	0	0	0.2071	1.8444	2.4477	4.0301	2.8101	1.8994	0	0.2175	0.2246	0	0.3255	0.3371	2.135	4.1055	3.1899	1.9967	0	0	0	0	0	0	0	0.2631	0	0.3394	0	0	0	0	0	0	1.8713	1.48	2.1247	3.4378
Negative	2.7296	833.208	2.7296_833.2082	0	0	0	0	0	0	0	0	0	0	0	0	0.3825	0	0	1.345	1.6695	0	1.0459	0	0	0	0	0	0	0	0	0	0	0	0	0	0	0	0	1.6747	2.1047	1.988	1.6979	1.1453
Negative	2.4181	835.266	2.4181_835.2658	0	0	0	0	0	0	0	0	0	0	0	0.169	0	0	0	0	0	0	0	1.8841	6.1419	9.9958	3.426	6.7648	9.7425	1.9119	3.6767	3.8393	5.2874	2.6625	0	0	0	0	0	0	0	0	0	0
Negative	2.2625	835.271	2.2625_835.2707	0	0	0	0	0	0	0	0	0	0	0	0	0	0	0	0	0	0.6492	0	0.8523	0	0	0	0	0	0	1.4789	1.7074	2.2189	0.8713	0	0	0	0	0	0	0	0.1122	0	0
Negative	4.7905	835.341	4.7905_835.3409	0	0	0	0	0.1197	0.1885	0	0.2369	0	0	0	0	0	0	0	0	0	0	0	0	0	0	0	0	0	0	0	0	0	0	0	0	0	0	0	3.8267	2.9623	0	2.5821	0
Negative	0.4929	836.268	0.4929_836.2675	1.9509	3.7443	5.1684	1.6657	2.4537	0	0.5445	0	0	0	1.5432	2.8768	1.3398	2.0098	3.5604	0.0799	0	0.3287	0	0	0.5823	2.8554	0.9362	1.7432	2.9308	0	0	0	0	0	0	0	0	0.3646	0.5144	0.0761	0	0	0	0
Negative	0.5011	836.277	0.5011_836.2765	1.9509	3.7443	5.1684	1.6657	2.4537	0	0.5445	0	0	0	0.4815	2.8768	1.3398	2.0098	3.5604	0	0	0.3287	0	0	0.5823	2.8554	0.9362	2.1903	2.9308	0	0	0	0	0	0	0.2852	0.9864	0.3646	0	0	0	0	0	0
Negative	7.2329	837.192	7.2329_837.1923	0	0	0	0	0	1.8108	0	0	1.6337	1.0282	0	0	0	0	0	0.796	1.0454	0	1.1893	1.2718	0	0	0	0	0	1.1937	2.1166	1.0982	0.8085	1.6051	0	0	0	0	0	0	0	0	1.2233	1.7661
Negative	6.9765	837.201	6.9765_837.2013	0	0	0	0	0	2.4599	1.4223	1.9133	2.002	1.0458	0	0	0	0	0	0.9976	1.4258	1.3893	1.6198	1.3589	0	0	0	0	0	1.9545	2.7546	1.6563	0.6769	2.0403	0	0	0	0	0	0.9634	2.0377	2.0504	1.8187	2.9008
Negative	7.2314	837.212	7.2314_837.212	0	0	0	0	0	1.8108	0	0	1.6337	1.0282	0	0	0	0	0	0.796	1.0454	0	1.1893	1.2718	0	0	0	0	0	0	2.1166	1.0982	0.8085	1.6051	0	0	0	0	0	0	0	0	0	1.7661
Negative	1.6512	315.068	1.6512_315.0679	61.6126	33.5616	31.8244	42.6961	52.9866	46.8422	33.9963	18.0481	37.6719	26.689	91.4673	68.541	79.2739	71.971	87.7195	79.2574	65.9104	61.9004	36.3374	26.6019	0	57.3419	0	0	0	21.0048	21.6933	36.9488	21.4805	0	0	22.5028	20.0095	21.1835	28.0261	0	0	19.4492	0	0
Negative	1.2434	315.069	1.2434_315.0688	0	18.8317	25.3866	25.1823	0	25.1121	18.8446	20.8355	25.0845	25.1019	80.0328	49.7942	77.023	55.235	57.1386	80.8088	63.4796	69.3239	53.9541	46.7709	78.3693	45.1496	47.0025	46.2959	56.3037	15.2343	34.2543	41.9467	33.4575	18.6909	29.6779	19.4663	22.4368	18.2046	26.4981	16.7521	10.822	17.0204	23.3332	7.8119
Negative	1.3418	315.07	1.3418_315.0697	0	0	0	0	0	4.9573	3.9961	3.3467	3.5824	3.1058	0	0	0	0	0	80.8088	9.9497	10.8326	9.4273	7.9497	0	0	0	0	0	2.9088	3.8365	6.4013	2.0675	2.9901	0	0	0	0	0	0	0	3.2977	0	0
Negative	1.1415	315.071	1.1415_315.0709	0	0	0	0	0	0	2.073	0	0	0	0	0	0	0	0	4.5056	0	0	0	15.679	0	0	0	0	0	2.107	0	3.3762	0	4.6054	0	0	0	0	0	0	0	0	0	0
Negative	1.5408	315.071	1.5408_315.071	0	0	0	0	0	0	5.4006	0	6.9536	0	0	0	0	0	0	15.7859	8.7249	0	0	0	0	0	0	0	0	5.5725	2.048	4.5392	0	0	0	0	0	0	0	0	0	0	0	0
Negative	1.4157	315.071	1.4157_315.0711	0	0	0	0	0	4.9573	3.9716	3.3467	2.2423	2.0814	0	0	0	0	0	19.5012	9.9497	10.8326	9.4273	0	0	0	0	0	0	2.887	0	6.3649	2.0675	0	0	0	0	0	0	0	0	0	0	0
Negative	1.0223	315.072	1.0223_315.0716	0	0	0	0	0	0	0	0.0747	0	0	0	0	0	0	0	0	0	0	2.1343	3.782	0	0	0	0	0	0	2.3069	3.3762	2.7043	0	0	0	0	0	0	0	0	0	0	0
Negative	0.5153	315.072	0.5153_315.0721	0	0	0	0	0	3.3158	0	2.1317	4.0071	2.4842	0	0	0	0	0	7.2935	0	6.1174	6.1786	0	0	0	0	0	0	0	0	0	3.9557	0	0	0	0	0	0	0	0	0	1.6547	0
Negative	5.2287	315.086	5.2287_315.0864	0	0	0	0	0	0	0	0	0	0	0	0	0	0	0	6.8549	0	7.4288	7.1353	4.1185	0	0	0	0	0	0	0	0	0	0	0	0	0	0	0	0	0	0	0	0
Negative	1.3559	315.101	1.3559_315.1009	3.3159	1.7606	2.5659	2.7535	1.9154	0	0	2.9059	1.9815	0	4.628	2.0742	2.445	4.5241	2.6022	0	0	0	0	0	5.645	6.5127	10.0168	8.2909	5.4691	2.3927	3.2164	3.8655	3.0722	2.4364	4.8929	3.1123	2.7574	3.6491	3.6016	0	3.3046	3.9799	5.337	2.9507
Negative	6.9474	315.184	6.9474_315.1844	0	0	0	0	0	2.095	1.8758	1.4177	1.3493	0.6113	0	0	0	0	0	2.3738	1.4697	0.58	1.0903	0.6138	0	0	0	0	0	1.035	1.1204	0.7813	0.5723	0.6497	0	0	0	0	0	1.148	1.0541	1.2171	1.0869	0.9064
Negative	0.4766	317.056	0.4766_317.0559	0.8729	0.6326	0.907	0.6065	1.6881	0	1.2161	0	0	0	1.5118	1.629	1.1302	1.3952	1.944	2.833	0.9489	0.9943	0	1.5737	0	0.5616	0	0.5198	0.7314	0.4785	0	0	0	0	0	0.6701	0	0	1.083	0.3939	0	0	0	0.4588
Negative	3.3683	319.082	3.3683_319.0823	69.6398	84.4524	51.202	129.352	116.062	146.641	37.6062	58.5851	84.3415	97.271	0	3.3608	0	0	0	0	2.2093	1.8463	0	1.3544	10.6385	3.2499	0	3.4618	2.9844	0	12.2049	15.2084	20.9462	0	0	0	0	0	0.4238	0.8119	1.0973	17.2386	0	0
Negative	3.1833	319.083	3.1833_319.083	35.4624	38.5791	40.4412	39.7487	0	78.8424	94.3992	102.702	79.7082	163.213	35.2093	41.1614	21.5799	26.9837	40.0956	72.672	58.156	174.473	59.6769	216.065	0	0	0	0	0	0	7.4617	10.5781	7.1208	5.2679	0	0	0	0	0	0	0	18.8288	0	0
Negative	3.0657	319.083	3.0657_319.0834	0	0	0	0	0	16.2752	33.8577	35.1508	43.3642	59.3563	0	0	0	0	0	11.4392	12.6118	51.0184	7.624	47.8464	0	0	0	0	0	0	0	0	0	1.8061	0	0	0	0	0	0	0	9.5672	0	0
Negative	2.9585	319.084	2.9585_319.084	0	0	0	0	0	16.2752	16.8657	27.291	0	23.2154	0	0	0	0	0	12.052	11.7296	45.804	7.9649	32.8722	0	0	0	0	0	0	0	0	0	0	0	0	0	0	0	0	0	0	0	0
Negative	5.5013	837.375	5.5013_837.3748	0	0	0	0	0	0	0	0	0	0	0	0	0	0	0	0	0	0	0	0	0	0	0	0	0	3.7163	3.4129	3.737	4.1287	4.0399	0	0	0	0	0	1.5208	1.8529	3.2631	4.8681	6.5501
Negative	5.2292	837.377	5.2292_837.3773	0	0	0	0	0	0	0	0	0	0	0	0	0	0	0	1.7827	0	0	0	0	0	0	0	0	0	5.0819	0	0	0	0	0	0	0	0	0	0	0	0	0	0
Negative	3.348	839.33	3.348_839.3302	0	0	0	0	0	0	0	0	0	0	0	0	0	0	0	0	0	0	0	0	0	0	0	0	0	3.1673	0	0	0	1.5735	0	0	0	0	0	0	0	0	0	0
Negative	3.6819	839.333	3.6819_839.3335	0	0	0	0	0	0.6696	0	1.5885	0.4068	0	0	3.1221	0	0	6.5455	3.0947	1.9649	1.5265	1.7373	0.9396	0	0	0	0	0	3.5076	1.86	5.1742	0.9954	3.9253	0	0	0.3739	0	0	0	0	0	0	0
Negative	3.5573	839.336	3.5573_839.336	0	0	0	0	0	0	0	0	0	0	0	0	0	0	0	0	0	0	0	0	0	0	0	0	0	1.8271	0	2.0072	0	0	0	0	0	0	0	0	0	0	0	0
Negative	3.433	839.337	3.433_839.3365	0	0	0	0	0	0	0	0	0	0	0	0	0	0	0	0	0	0.8386	0	0	0	0	0	0	0	15.4551	0	1.4109	0	6.0373	0	0	0	0	0	0	0	0	0	0
Negative	5.3077	839.391	5.3077_839.391	0	0	0	0	0	2.4109	0	2.3203	0	0	0	0	0	0	0	0	0	3.4699	0	0	0	0	0	0	0	5.6837	4.0447	5.9914	5.0365	5.9947	0	0	0	0	0	0	2.1357	0	5.6189	7.3109
Negative	5.409	839.393	5.409_839.3927	0	0	0	0	0	0	0	0	0	0	0	0	0	0	0	0	0	0	0	0	0	0	0	0	0	0	0	3.9567	0	0	0	0	0	0	0	0	2.1357	0	5.4169	7.3109
Negative	4.0017	841.389	4.0017_841.3891	0	0	0	0	0	0	0	0	0	0	0	0	0	0	0	0.8981	1.3814	2.407	0.4856	2.0926	0.464	0	0	0	0	0	0	0	0	0	0	0	0	0	0.0722	0	0	0	0	0
Negative	5.1644	841.41	5.1644_841.4103	0	0	0	0	0	0.8865	0.6738	0.7374	0.7142	0.6557	0	0	0	0	0	1.1572	0.7519	1.2834	0.7108	0.8187	0	0	0	0	0	2.3436	2.064	2.8732	2.5131	2.139	0	0	0	0	0	0.9581	1.4533	1.9099	3.2223	3.452
Negative	3.6358	843.365	3.6358_843.3651	0	0	0	0	0	0	0.2008	0.2645	0.3374	0	0.1645	0	0	0	0	0.5257	0	0.7214	0	0	0	0	0	0	0	0	2.7435	3.1879	4.1548	0.2879	0	0	0	0	0	0	0	0	0	0
Negative	0.4916	845.281	0.4916_845.2813	0	0	0	0.2141	0.2654	0	0	0	0	0	0	0	1.7364	0	0.0978	0	0	0	0	0	0.2115	0.6795	4.0088	0.4475	0	0	0	0	0	0	1.9334	2.6964	2.2846	0	0.6121	1.0942	0.9037	0	0	0
Negative	3.7346	849.245	3.7346_849.2447	0	0	1.6258	1.6518	0	0	0	0	0	0	1.2725	0	0	1.8489	0	0	0	0	0	0	3.2827	2.9863	0	3.3848	0	0	1.7295	0	0	0	0	0	0	0	0	0	0	0	0	0
Negative	3.6455	849.245	3.6455_849.245	3.1677	0	3.8351	3.3659	2.6369	3.7988	0	0.8642	3.3465	1.8287	3.2268	2.8302	6.2676	5.2639	0	0	0	0	1.6371	0	9.3298	7.4292	10.546	10.0167	6.7652	1.8506	6.1958	3.2068	3.5032	2.9728	6.1834	3.4559	3.381	5.0451	0	0	0	4.365	3.7878	3.1767
Negative	2.4049	849.282	2.4049_849.2824	0	0	0	0	0	0.3767	0.1006	0.1156	0	0	0	0	0	0	0	0	0.3734	0.6686	0.2721	0.5488	0	0	0	0	0	0.9706	1.8833	1.7692	2.6794	1.1177	0	0	0	0	0	0	0.2384	0.336	0	0.2932
Negative	3.2031	849.287	3.2031_849.2871	0	0	0	0.7355	0	0	0	0	0	0	0	0	0	0.3604	0	0	1.2081	1.2693	0	1.2195	3.9437	0	0	0	0	0	3.7678	3.0586	5.7568	0	0	0	0	0.4405	0	0	0	0	0	0
Negative	2.8808	319.085	2.8808_319.0847	0	0	0	0	0	0	12.3161	12.5382	0	0	0	0	0	0	0	11.4596	0	22.5136	6.3081	28.5067	0	0	0	0	0	0	0	0	0	0	0	0	0	0	0	0	0	0	0	0
Negative	3.214	319.108	3.214_319.1083	35.4624	38.5791	40.4412	33.5491	26.3156	0	0	0	0	0	35.2093	41.1614	21.5799	26.9837	40.0956	32.231	0	0	0	0	0	0	0	0	0	0	7.4617	6.1683	7.1208	5.2679	0	0.9295	0.7006	0	0	0	0	0	0	0
Negative	3.8165	319.122	3.8165_319.1223	0	0	0	0	0	0	0	0	0	0	0	0	0	0	0	0	0	0	0	0	0	0	0	0.3058	0	0	0.8216	0	0	0	0	0	0	0	0	5.3219	8.0829	0.5147	0.8283	13.2137
Negative	3.2463	319.137	3.2463_319.1367	0	0	0	0	0	0	0	0	0	0	0	0	0	0	0	0	1.1199	0	2.5471	1.3135	0	2.4139	0	0	0	1.9416	6.1338	6.0736	6.6707	3.2163	0	0	0	0	0	0	0	1.7524	3.5228	0
Negative	4.805	319.164	4.805_319.1641	0	0	0	0	0	11.8001	0	2.548	0.7324	1.4416	0	0	0	0	0	1.8583	1.2324	0	3.9023	0	0	0	0	0	0	3.8503	2.2037	5.19	2.9684	7.446	0	0	0	0	0	0.9761	0	0.5998	0	0
Negative	0.5152	321.065	0.5152_321.0647	0	0.5684	0.3838	0	1.6142	0.3401	0.4833	0	0	0	0	1.7632	1.7763	0.8527	2.0223	7.8161	0.8361	0.8394	0.9591	0.8905	1.7782	1.2605	2.0136	3.4102	0.8464	0	0	0.5684	0	0	1.2807	1.3925	0	0	1.4907	0.4823	1.3066	0.9843	0	0.5264
Negative	1.5192	321.101	1.5192_321.101	0	0.9555	0	0	0	1.588	3.8937	3.3276	0	1.3269	0	0	0	0	0.8154	0	0	0	0	0	0	0	0.3176	0	0	0	0	0	0	0	0	0	0	0	0	0	0	0	0	0
Negative	2.0909	321.103	2.0909_321.1031	1.5314	1.371	2.1749	2.2509	1.9196	0	2.5859	2.2604	1.3025	0	1.1645	1.7949	0	1.0529	1.7198	2.3464	1.1683	0.7721	0	0	0	0	0	5.3654	3.3003	3.6259	0.4827	0.8759	0.9706	2.0022	0	0	0	0	0	0	0.841	0.4003	0.8654	0.9696
Negative	0.6361	323.078	0.6361_323.078	0	0	0	0	0	0	0	0.8624	0.5863	0	0	0	0	0	0	1.5022	1.6061	1.9656	1.3574	1.9451	0	0	0	0	0	1.9986	1.2249	0	1.5206	1.6091	0	0	0	0	0	0	0	0.6405	0.2854	1.0189
Negative	0.513	323.08	0.513_323.0804	2.9391	1.8289	1.0371	2.7213	2.4277	0.3258	1.6337	1.7123	1.3298	0.3667	2.2156	4.9074	3.4544	1.6577	6.8945	6.1229	3.7432	4.6526	4.0083	3.5349	0	4.7975	0.7094	2.9636	4.1828	4.621	1.87	3.5242	2.0609	2.8254	1.6591	1.8208	1.9024	0.3073	1.8851	0.8965	1.148	1.9361	0	1.6419
Negative	1.9681	323.117	1.9681_323.1174	0	4.0858	0	6.4841	0	11.811	0	0	0	0	0	6.2022	0	4.3573	5.1589	17.0491	0	0	0	0	0	4.7829	0	0	0	14.653	0	4.7133	5.9694	0	0	0	0	0	0	0	0	0	0	0
Negative	1.5767	323.13	1.5767_323.1299	0	0	0	0	0	3.0695	2.6845	0	2.1608	1.385	0	0	0	0	1.8229	0	3.6976	0	0	0	0	0	0	0	0	0	0	1.8977	0.9349	2.3811	0	0	0	0	0	0	3.1589	0	5.481	0
Negative	2.0144	323.132	2.0144_323.1318	37.5799	36.3664	45.0545	38.6587	33.4482	24.9726	27.0312	33.6333	26.7366	18.7537	41.3279	39.7516	32.731	44.8908	30.9574	33.2738	28.9997	32.5986	31.3366	27.1311	26.3592	26.6243	17.7164	30.6315	36.6447	29.3588	10.4376	10.1943	13.212	17.6721	18.8846	20.8663	14.6954	27.1078	19.7991	11.9273	12.7765	19.8631	26.9852	24.4687
Negative	1.8027	323.132	1.8027_323.1325	0	0	0	0	0	7.5998	9.7689	12.2287	7.1099	5.4161	0	0	0	0	0	8.7247	10.0903	12.2669	10.8951	7.7817	0	0	0	0	0	9.678	3.6748	3.5888	4.1868	9.5027	0	0	0	14.1171	0	0	0	5.8923	9.6719	7.4059
Negative	1.6532	323.135	1.6532_323.1345	0	0	0	5.9594	0	4.9551	5.1843	6.6605	6.8694	4.1627	0	0	0	0	3.1947	8.1025	7.0617	5.9762	6.3147	3.2671	0	6.0001	0	0	0	9.7736	5.2912	5.1976	5.3263	10.7435	8.4816	0	5.6743	14.1171	0	12.026	8.9972	13.6784	17.9196	13.1365
Negative	2.5673	324.021	2.5673_324.021	0	0	0	0	0	1.6492	1.8527	2.6945	1.7069	2.016	0	2.8044	0	0	0	1.7725	1.3238	3.4021	1.0466	3.0714	0	0	0	0	0.1296	0	0	0	0	0	0	0	0	0	0	0	0	0.4666	0	0
Negative	7.923	849.41	7.923_849.4097	0	0	0	0	0	1.3022	0.8053	3.0529	2.5626	1.4029	0	0.4647	0	0.3642	0.8231	0	3.9462	6.7074	4.7333	10.9373	0	0	0	0	0	0.1016	0.2137	0.1465	0	0.2434	0	0	0	0	0	2.7187	6.1883	0.6801	2.3188	5.8708
Negative	7.9459	849.426	7.9459_849.426	0	0.3846	0.5593	0.9618	0	1.3022	0.8053	3.0529	2.5626	1.4029	0	0	0	0	0.8231	0	3.9462	6.7074	4.7333	10.9373	0	0	0	0	0	0	0.2137	0.1432	0	0.2434	0	0	0	0	0.3803	2.7187	6.1883	0.5811	2.3188	5.8708
Negative	3.7339	851.299	3.7339_851.2987	0	0	0	0.1408	0	0	0.5138	0.1654	0	0	0	0	0	0.2694	0	0.5084	0	0.489	0	0	0.7355	0.2985	0	0	0.3423	5.6905	0	0.5983	0.1746	2.4296	0	0	0	0	0	0	2.3122	0	0	0
Negative	7.5102	851.427	7.5102_851.4272	0	0	0.2486	0	0	0.4239	0	0	1.9679	0.5828	0.2921	0	0	0	0	0	0.8625	1.5637	0.9295	4.7406	0	0	0	0	0	0	0	0	0	0.186	0.2203	0.2024	0	0	0	0.8391	1.0974	0.9544	1.2633	5.9896
Negative	6.5602	853.198	6.5602_853.1982	0	0	0	0	0	3.626	3.1972	4.4685	3.9469	2.2727	0	0	0	0	0	2.7451	3.7495	4.3953	4.5576	3.8152	0	0	0	0	0	2.3103	3.5171	2.3579	1.9235	3.7202	0	0	0	0	0	2.8109	4.236	4.6583	3.836	4.2135
Negative	4.7319	853.367	4.7319_853.3674	0	0	0	0	0	0	0	0	0	0	0	0	0	0	0	0	0	0	0	0	0	0	0	0	0	0	0.8165	1.1876	1.1705	1.903	0	0	0	0	0	0.6585	0	0	1.5946	1.5276
Negative	7.1394	853.441	7.1394_853.4409	0	0	0	0	0	0.4866	0	0	1.7025	0.4864	0	0	0	0	0	0	1.035	1.1825	0	1.6188	0	0	0	0	0	0	0	0	0	0	0	0	0	0	0	0.5376	0.7232	2.7331	1.6701	9.0309
Negative	6.5251	857.267	6.5251_857.2668	0.2109	0	0	0	0.4345	1.4972	6.1286	4.8783	0	5.2839	0	0	0	0	0	0	0	0	0	0	0	0	0	0	0	0	0	0	0	0.0816	0	0	0	0	0	0	0	0	0.4799	0
Negative	6.6049	857.267	6.6049_857.2674	0	0	0	0	0	1.0877	3.4256	0	0	4.449	0	0	0.1241	0	0	0.043	0	0	0	0	0	0	0	0	0	0	0	0	0.0723	0	0	0	0	0	0	0	0	0	0.4481	0
Negative	6.4242	857.269	6.4242_857.2685	0	0	0	0	0	3.5982	13.0914	9.4171	0.8916	12.6669	0	0	0	0	0	0	0	0	0.2382	0.0396	0	0	0	0	0	0.3503	0	0	0	0.0777	0.1595	0.1566	0	0	0	0	0.8896	0	1.2972	0.2275
Negative	3.3176	857.274	3.3176_857.274	0	0	0	0	0	1.0616	1.2943	1.4197	1.1529	0.5607	0	0	0	0	0	0.6318	0.854	0.9017	1.0728	0.6637	0	0	0	0	0	0	0.8437	1.3526	1.048	1.0255	0	0	3.6236	0	0	3.4916	2.5164	2.1037	3.8855	2.3411
Negative	2.9551	859.343	2.9551_859.3427	0	0	0	0	0.1992	1.4174	1.1931	1.5293	1.2392	1.7481	0	0	0.1531	0	0	1.289	1.6288	2.7713	1.4038	2.3367	0	0	0.2039	0	0	0.7561	0.8254	0.942	1.4945	1.4889	0	0	0	0.1154	0	0.5463	0.6607	1.4222	1.8652	1.9136
Negative	2.9584	859.372	2.9584_859.3717	0	0	0	0	0	1.267	0	0	1.2392	1.3437	0	0	0	0	0	0	0	2.2516	0	1.5105	0	0	0	0	0	0	0	0	1.4945	0	0	0	0	0	0	0	0	0	1.8652	0
Negative	2.9906	859.396	2.9906_859.3958	0	0	0	0	0	0.7077	0	1.1216	1.0652	1.3437	0	0	0	0	0	0	1.989	3.776	0	2.3598	0	0	0	0	0	0	0	1.1148	0	0	0	0	0	0	0	0	0	0	1.8652	0
Negative	3.1429	859.401	3.1429_859.401	0	0	0	0	0	0.7957	0.8655	1.3037	1.4631	1.0186	3.1229	0	0	0	0	1.9119	2.8471	4.8117	2.3757	5.3389	0	0	0	0	0	1.6642	2.6404	2.6458	2.0688	3.3003	0	0	0	0	0	1.1409	0.7498	1.691	0	0
Negative	2.5527	861.21	2.5527_861.21	0	0	0	0	0	0	1.4291	1.3331	3.8307	3.2525	0.2394	0	0	0	0	1.1667	1.7055	3.2957	1.5975	3.4044	0	0	0	0	0	0.39	1.779	1.604	2.2681	0.7152	0	0	0	0	0	1.8958	3.8745	2.6506	3.0491	2.1996
Negative	2.0377	325.093	2.0377_325.0932	5.4204	4.1482	4.0266	5.5902	5.1215	0	0	0	0	0	6.2209	5.7256	5.5945	4.6215	3.0998	0	0	0	0	0	13.2927	5.0961	13.7885	5.8756	7.6857	0	0	0	0	0	7.9332	8.2856	3.3208	7.0992	6.4534	0	0	0	0	0
Negative	7.857	325.18	7.857_325.1803	0	0	1.2794	0.712	0	0	11.7254	0	0	0	0	0	0	0	0.97	0	0	0	1.6731	0	0	0.4976	1.512	0	0	0	0	0	3.0164	0	0	0	1.1973	0	0	67.2928	15.1408	0	0	0.7288
Negative	8.1162	325.181	8.1162_325.1814	0	0	0	0	0	0	0	0	0	2.3914	0	0	0	0	0	0	16.1917	0	0	0	0	0.6479	0	0	0	0	9.9117	0	0	0	0	0	0	0	0	83.1151	0	0	0	4.3067
Negative	8.7629	325.182	8.7629_325.1819	0	0	3.8383	0	2.1201	22.014	0	0	0	0	0	2.2312	0	0	1.5187	12.7426	17.8039	5.4408	0	1.5315	0	2.0843	0	3.621	2.4588	0	4.4575	9.9114	4.6898	3.5565	3.0963	0	0	3.6526	0	21.317	0	0	16.6807	0
Negative	7.466	325.183	7.466_325.1825	0	0	0	0.6957	0	0.3886	0	0	2.5922	0	0	0	0	0	0	0	0.3035	0	0	0	0	0	0	0.686	0	0	0.5289	0	0	0	0	0	0	0	0	0.789	11.1117	0	0	0
Negative	8.225	325.183	8.225_325.1826	0	0	0	0	0	0.4766	0	0	0	0	0	0	0	0	0	0	0	2.4421	0	0	0	0	0	0	0	0	0	0	0	0	0	0	0	0	0	36.5283	0	0	0	4.7694
Negative	7.7246	325.184	7.7246_325.1837	0.7693	0	0	0	0	0	4.8572	0	0	0.247	0	0	0	0	0	0	0	0	0	0	0	0	1.3731	0	1.0189	0	0	0	2.6675	0	0	0	0	0	0	0	15.1975	0	0	0
Negative	7.6389	325.184	7.6389_325.184	0	0	0	0	0	0	0	0	0	0.2956	0	0	0	0	0	0	0	0	0	0	0	0	0	0	1.2317	0	0	0	2.1126	0	0	0.9987	0	0	0	0	14.3197	0	0	0
Negative	8.6663	325.185	8.6663_325.1855	1.6195	0	1.5109	0	1.2442	0	0	0	0	2.6441	1.8155	0	0	2.0672	0	7.3979	0	4.1433	0	1.4379	0	0.8975	0	0	1.6961	0	0	3.1564	0	8.1853	1.4771	0	1.57	0.9519	2.5762	0	6.2252	0	6.4426	2.7362
Negative	8.0383	325.186	8.0383_325.1864	0	0	0	0	0	0.3517	0	0	0	0	0	0	0	0	0	0	14.4774	0	0	0	0	0	0	0	0	0	9.2237	0	0	0.3643	0	0	0	0	0	120.514	0	0	0	2.4534
Negative	6.0992	325.196	6.0992_325.1962	0	0	0	0	0	0	0	0	0	2.8291	0	0	0	0	0	0	0	0	0	3.5727	0	0	0	0	0	0	0	0	0	0	0	0	0	0	0	0	0.9139	0	0	0
Negative	6.2934	325.198	6.2934_325.198	0	0.3145	0	0	0	0	0.2999	0	0	0	0	0	0	0	0	5.5678	0	0	0	1.4966	0	0	0.4726	0.6545	0	0	0	0	0	0	0	0	0	0	0	0	0	0	0	0
Negative	6.3628	325.2	6.3628_325.2001	0	0	0	0	0	0.6991	0	0	0	1.5384	0	0	0	0	0	4.6314	0	0	19.7111	2.3109	0	0	0	0	0	0	0	0	0	0	0	0	0	0.688	0	0	0	0	0	0
Negative	1.9904	326.087	1.9904_326.0873	3.3005	6.1535	2.1566	10.007	5.9557	0.4944	0.7127	0.5245	0	0.4352	0.6587	0	0.6501	0	0	0	0	0.4275	0.3676	0.3439	0	0.3528	0	0.8586	1.3152	0	0.3767	0.3809	0.4729	0.3387	0	0	0	0	0	0.5693	0	0.6679	0.5831	0.3776
Negative	0.4533	326.899	0.4533_326.8993	7.842	11.3159	11.2977	8.2519	8.2707	0	0	0	3.3907	0	7.7684	1.3032	4.6541	5.8081	5.6546	0	0	0	0	0	4.6724	5.2166	4.1058	7.3118	4.621	3.9131	2.9633	2.7546	4.2801	3.0797	3.5101	3.9568	3.3374	3.4616	3.4215	0	0	0	0	0
Negative	2.6768	327.052	2.6768_327.0517	3.1645	3.1195	3.2284	3.1488	3.8317	0	0	0	0	0	4.0648	3.7132	3.4567	5.5702	3.3796	0	0	0	0	0	2.761	2.6205	3.455	2.6597	4.287	0	0	0	0	0	3.4606	4.0927	5.2516	4.4402	7.1679	0	0	0	0	0
Negative	2.4146	861.215	2.4146_861.2145	0	0	0	0	0	2.8132	1.5054	1.342	3.5809	2.468	0	0	0	0	0	0	0	1.5735	1.2713	2.563	0	0	0	0	0	0.343	1.1492	0	1.4596	0.647	0	0	0	0	0	0	0	2.3389	2.3119	1.8812
Negative	3.7042	861.244	3.7042_861.244	0	0	0	0	0	1.7349	1.9761	1.7954	1.8797	1.0951	0	0.2591	0.2383	0	0	0.5166	0.4655	0	0.3729	0.3096	0	0	0	0	0	0.2412	0	0	0	0.2791	0	0	0	0	0	0.4593	0.495	1.4087	0.7389	0.7818
Negative	6.5782	861.244	6.5782_861.244	5.0293	3.3156	0	4.1037	4.7652	10.6514	4.4894	4.9874	9.119	7.697	8.1646	4.6002	14.3302	9.1565	5.9723	9.8298	18.0224	10.3232	9.3576	7.1898	4.7331	0	5.3839	4.7692	0	2.4365	6.7142	6.2689	2.2289	5.267	4.5398	2.938	0	4.0345	0	5.2165	6.3328	9.5247	15.6425	9.1744
Negative	6.7202	861.245	6.7202_861.2455	0	0	0	0	0	1.5935	0	0	0	1.3	0	0	0	0	0	0	2.007	0	0	0	0	0	0	0	0	0	0	0	0	0	0	0	0	0	0	0	0	1.2365	3.3807	1.8487
Negative	3.0002	861.414	3.0002_861.4145	0	0	0	0	0	1.7948	1.9826	2.8904	2.0154	1.8175	0	0.2213	0	0	0	2.6573	5.3657	10.0835	3.3703	8.5448	0	0	0	0	0	0.7445	2.1527	2.7997	3.9902	2.4157	0	0	0	0	0	2.4769	3.5488	4.2896	6.7286	5.48
Negative	2.8899	861.416	2.8899_861.4156	0	0	0	0	0	0	0	0	0	0	0	0	0	0	0	1.7742	0	2.8771	0.9762	2.9199	0	0	0	0	0	0	0.3697	0	0.7739	0	0	0	0	0	0	0	0.6701	1.0237	2.3706	2.0907
Negative	3.058	863.203	3.058_863.2029	4.3869	3.6651	0	4.5246	3.9426	0	0	0	1.898	0	0	0	0	0	0	0	0	0	0	0	0.3069	0	0	0	0	0	0	0	0	0	9.4345	9.0559	10.2428	7.7281	0	12.5403	7.6545	6.9234	8.5258	2.8795
Negative	3.5717	863.226	3.5717_863.2258	0	0	0	0	0	0	0	0	0	0	0	0	0	0	0	0	0	0	0	0	5.1061	2.521	6.9658	6.2725	0	1.4187	2.8323	1.7673	0	2.207	0	0	0	0	0	0	0	0	0	0
Negative	3.7695	863.227	3.7695_863.2267	0.7506	0.3805	0.7091	0.6514	0	0	0	0	0	0	0	0	0	0	0	0	0	0	0	0	3.175	0	3.6992	3.2583	0	0	0	0	0	0	0	0	0.4209	0	0	0	0	0	0	0
Negative	6.3247	863.234	6.3247_863.2342	0	0	0	0	0	0	2.6105	1.8819	0	2.3111	0	0	0	0	0	0	0	0	0	0	0	0	0	0	0	0	0	0	0	0	0	0	0	0	0	0	0	0	0	0
Negative	3.2082	863.292	3.2082_863.2917	0	0	0	0	0	0.4538	0.9358	0.997	0.6068	0.5221	0	0	0	0	0	0.8537	1.5035	1.5127	0.8473	1.2463	0	0	0	0	0	0	0.9648	1.6239	1.6177	0	0	0	0	0	0	0.3755	0	0	0.3773	0
Negative	2.6195	867.24	2.6195_867.2396	0	0.2199	0	0	0	0	0.5149	0.7609	0.3783	0.2947	0	0	0	0	0	0	0	0	0.2107	0	0	3.142	0	3.8686	0	4.0297	0.9216	1.3382	2.5712	7.7928	0	0	0	0	0.2201	0	0	1.6158	0.5809	2.3911
Negative	2.744	869.249	2.744_869.2489	0	0	0	0	0	1.4771	4.5945	4.6524	0	2.1569	0	0	0	0	0	0	0	0	0	0	0	0	0	0	0	0	0	0	0	0	0	0	0	0	0	0	0	0	0	0
Negative	2.4683	869.254	2.4683_869.2541	0	0	0	0	0	0.8885	0	1.9357	0	2.0495	0	0	0.1693	0	0	0	0	0	0	0	0	0	0	0	0	0	0	0	0	0	0.177	0	0	0	0	0	0	0	0	0
Negative	2.5987	869.259	2.5987_869.2587	0	0	0	0	0	2.1188	3.3769	3.7814	0	3.3979	0	0	0	0	0.2347	0	0.4022	0.2687	0	0.2959	0	0	0	0	0	0.9859	0	0.2118	0.1945	2.3314	0.0638	0	0	0	0	0	0	0	0	0
Negative	2.7462	869.269	2.7462_869.2686	0	0	0	0	0	0	4.5945	0	0	2.1569	0	0	0	0	0	0	0	0	0	0	0	0	0	0	0	0	0	0	0	0	0	0	0	0	0	0	0	0	0	0
Negative	2.3573	327.107	2.3573_327.1074	5.5267	7.247	3.0639	5.4441	8.1004	2.0644	0	0	0	1.3504	0	4.6279	0	2.1125	4.1532	1.4333	0	0	0	0	4.0736	5.2769	3.4285	4.6629	5.407	0	0	0	0	1.6886	2.9119	2.9466	0	0	0	0	0	1.7236	0	1.4377
Negative	1.7111	327.11	1.7111_327.1097	0	0	0	0	0	0	0	0	0	0	0	0	0	0	0	0	0	0	0	0	0	0	0	0	0	0	0	0	0	0	0	0	0	0	0	1.0775	0	2.2148	2.2166	0
Negative	5.6657	327.216	5.6657_327.2157	11.6667	6.4377	11.8773	16.4531	13.066	177.005	36.9964	37.8582	47.3548	138.137	32.1997	14.1838	41.4028	34.7667	11.0821	58.8218	50.1668	36.7371	144.077	94.3691	9.0516	5.5448	8.3556	10.4294	4.4859	9.8576	34.521	40.6032	41.3932	26.8182	9.1738	9.4631	5.3858	0	0	36.8735	36.5596	83.8142	67.4588	73.3474
Negative	6.2855	327.216	6.2855_327.2158	0	0	0	0	0	9.6406	2.8943	2.8051	0	5.6262	0	0	0	0	0	0	0	0	4.2166	0	0	0	0	0	0	0	1.3637	2.8794	3.3573	1.5498	0	0	0	0	0	0	0	5.048	0	0
Negative	5.5927	327.216	5.5927_327.2165	0	0	0	0	0	24.0941	7.2352	4.2725	4.5046	13.8939	0	0	0	0	0	7.1186	4.9473	9.761	36.6737	18.2491	0	0	0	0	0	1.6892	8.9696	12.052	9.2034	3.2673	0	0	0	0	0	0	4.2673	12.8483	2.4272	7.5749
Negative	6.9196	327.217	6.9196_327.217	0	0	0	0	0	0	0	0	0	0	0	0	0	0	0	5.2034	0	1.5957	10.445	0	0	0	0	0	0	0	0	0	0	0	0	0	0	0	0	0	0	0	0	0
Negative	5.4125	328.059	5.4125_328.0593	0	0	0	0	0	1.9509	1.46	2.4641	2.407	1.6483	0	0	0	0	0	1.122	1.0087	1.8239	2.7799	1.9809	0	0	0	0	0	0	0	0	0	0	0	0	0	0	0	0	0	0	0	0
Negative	4.8999	328.059	4.8999_328.0594	3.2886	2.6346	3.0255	2.8995	3.8777	0	0	0	0	0	2.2855	3.8687	1.559	3.4252	3.7858	0	0	0	0	0	5.615	6.4088	4.2655	5.8205	5.6899	0	0	0	0	0	3.1604	3.0546	2.6276	3.6154	2.778	0	0	2.4139	1.999	0
Negative	1.7535	328.108	1.7535_328.1076	1.5254	5.2715	1.7681	4.5631	3.3606	0	0	0	0	0	0.4845	0.6482	0	0.6242	0.4595	0	0	0	0	0	0	0.3489	0	0.5864	1.2779	0	0	0	0	0	0	0.4603	0	0	0	0	0	0	0	0
Negative	5.4375	329.065	5.4375_329.0651	412.583	206.1	237.893	317.128	378.064	320.194	284.493	306.657	370.013	200.602	247.286	213.862	288.379	383.998	405.457	291.732	271.534	286.641	391.898	259.968	38.4685	30.9459	57.8953	33.9142	37.2354	31.9779	140.28	79.8988	61.6164	35.3763	109.56	60.1818	100.672	76.1882	42.6795	95.6331	76.9898	106.671	44.87	100.759
Negative	5.7784	329.065	5.7784_329.0653	2.0016	0	0	3.5445	0	0.8334	0.513	0.9009	0.9932	0.8101	0	0.9752	2.9385	0	3.2591	0	0	0.7674	0	0.763	0	0	0	1.5806	0	0	0	0	0	0	0	0	0	1.3295	0	0	0	0	0	0
Negative	4.1516	329.066	4.1516_329.0656	0	0	0	0	0	2.2623	4.633	2.9789	2.3949	2.4751	0	0	0	0	0	2.9267	2.7966	3.9169	2.841	3.3587	0	0	0	0	0	0	0	0	0	0	0	0	0	0	0	0	1.5755	0	1.1942	0
Negative	4.2865	329.066	4.2865_329.0659	17.2005	14.2868	13.2945	20.5867	19.7558	5.1986	11.0794	7.7299	7.3327	6.3998	17.2324	23.3287	17.8921	18.3461	16.5079	9.031	8.1118	9.7928	7.704	8.9715	0	0	0	0	1.8096	0	0	0	0	0	4.9728	5.1331	3.9566	4.7784	6.1906	0	5.9262	3.5163	2.7481	2.0069
Negative	5.6081	329.067	5.6081_329.0665	8.3279	0	4.6072	6.2148	0	2.2425	1.7616	0	3.1735	1.3116	3.9094	0	0	7.2524	11.2591	1.7688	1.8882	2.7241	0	1.7569	0	0	0	0	1.3932	0	1.3341	0	0.6421	0	2.8595	0	0	1.7999	0	0	0	1.9359	0	0
Negative	1.5629	329.086	1.5629_329.0863	11.5236	8.0778	15.9061	8.4173	8.6962	0	0	0	1.8992	0	8.7148	4.1636	12.717	7.3507	5.2918	0	4.9939	3.1095	2.8041	0	25.6683	11.1552	31.0543	21.5987	17.7561	4.0817	4.0489	4.2999	2.1706	3.2602	31.9303	21.7085	15.9413	41.2386	26.3453	15.1123	10.3889	26.4546	23.6184	13.0291
Negative	1.1996	329.087	1.1996_329.087	0	0	0	0	0	0	0	0	0	0	0	0	0	0	0	0	0	0	0	0	0	0	0	0	0	0	0	0	0	0	0	0	0	0	0	1.2217	0	3.4058	2.3301	0
Negative	3.3366	869.318	3.3366_869.3178	0	0	0	0	0	0	0	0	0.1848	0	0	0	0	0	0	2.3527	2.3306	1.8235	1.5696	0.7711	0	0	0	0	0	0	0.1036	0	0.101	0	0	0	0	0	0	0	0	0	0	0
Negative	4.6118	869.347	4.6118_869.3468	0	0	0	0	0	0	0	0	0	0	0	0	0	0	0	0	0.3007	0	0	0	0	0	0	0	0	0	0	0	0	0	0	0	0	0	0	0.4842	0.8208	1.6008	2.0635	1.7173
Negative	3.5738	869.347	3.5738_869.3471	0	0	0	0	0	0	0	0	0	0	0	0	0	0	0	0	0	0	0	0	0	0	0	0	0	4.9913	0	0	0	2.2199	0.1736	0	0.1423	0	0	0	0	0	0	0
Negative	3.2134	873.369	3.2134_873.3693	0	0	0	0	0	0	0	0	0	0	0	0	0.1078	0	0	0	0	2.9078	0	2.4422	0	0	0	0	0	0	0	3.4031	3.3111	0	0	0	0	0	0	0	0.2397	0	0	0
Negative	2.9582	873.375	2.9582_873.3749	0	0	0	0	0	0	0	0	0	0	0	0	0	0	0	3.0322	1.8836	0	1.2902	0	0	0	0	0	0	0	0	0	0	1.6027	0	0	0	0.1538	0	0	0	0	0	0
Negative	3.0701	873.381	3.0701_873.3808	0.1982	0	0	0	0	1.4968	3.2142	3.546	1.2757	1.7318	0	0	0	0	0	0	0	0	0	0	0	0	0	0	0	1.4675	0	0	3.3493	3.6318	0	0	0	0	0	0.2257	0	0.6322	0.7627	0
Negative	3.1407	875.379	3.1407_875.3788	0	0	0	0	0	1.5593	2.6515	2.7093	1.4463	0	0	0	0	0	0	4.0802	5.4523	9.4003	2.4693	6.6293	0	0	0.1024	0	0	0	10.8445	14.1823	16.5699	0	0	0	0	0	0	0	0	0	0	0
Negative	3.2152	875.389	3.2152_875.3889	0	0	0	0	0	0	0	0.9768	0	0	0	0	0	0	0	2.8944	2.4226	4.0023	1.3132	2.6103	0	0	0	0	0	0	0	2.43	1.9855	0	0	0	0	0	0	0	0	0	0	0
Negative	2.8658	875.39	2.8658_875.3896	0	0	0	0	0	0	0	0.7538	0	0.2566	0	0	0	0	0	1.6518	0	0.6297	0.6742	0.9823	0	0	0	0	0	0.927	0.7813	0.5347	0	1.7743	0	0	0	0	0.1413	0	0	0	0	0
Negative	3.1171	875.392	3.1171_875.3923	0	0	0	0	0	1.5593	2.6515	2.7093	0	1.722	0	0	0	0	0	4.0802	5.4523	9.4003	2.4693	6.6293	0	0	0	0	0	0.4401	10.8445	14.1823	16.5699	2.0974	0	0	0	0	0	0	0	0	0	0
Negative	2.9609	875.394	2.9609_875.3935	0	0	0.0932	0	0.1025	1.6432	1.7997	3.0162	0	1.5915	0	0	0	0	0	8.3344	6.0221	4.8563	4.6062	5.1949	0	0	0	0	0	2.4491	6.6471	7.296	9.0298	7.7703	0	0	0	0	0	0.4694	0.2767	0	1.2779	1.1872
Negative	3.1689	881.324	3.1689_881.3237	0	0	0	0	0	0	0	0	0	0	0	0	0	0	0	0.1509	0	0	0	0	0	0	0	0	0	2.8346	0	0	0	2.7546	0	0	0	0	0	0	0.4072	0.182	0	0
Negative	7.7056	881.443	7.7056_881.4433	0	0.1229	0	0	0	0	0	1.1772	0.7785	0.3924	0.155	0	0	0	0	0	0.699	0.8572	0.7174	2.4338	0	0	0	0	0.2268	0	0	0	0	0	0	0	0	0	0	0	1.0772	0	0	2.6881
Negative	7.5784	881.445	7.5784_881.4447	0	0	0	0	0	0.8956	0.9609	0.8885	0.728	0.8413	0	0	0.098	0	0	0.9428	0.7622	1.1165	0	1.4542	0	0	0	0	0	0.2821	0	0	0.2153	0.5565	0	0	0	0	0.222	0.4493	0.8116	0	0	1.4914
Negative	2.3207	883.237	2.3207_883.2366	0	0	0	0.1173	0	0	0	0	0	0	0	0	0	0	0.0918	0.1353	0	0	0	0.1131	0	0	0	0	0	6.9486	1.3281	1.7009	2.2452	5.8312	0.1913	0	0	0	0	0.2572	0.5556	0	0.8004	1.2885
Negative	2.7464	883.268	2.7464_883.2677	0	0	0	0	0	3.8319	2.5443	1.8795	1.9554	2.3539	0	0	0	0	0	0	0	0	0	0	0	0	0	0	0	0	0	0	0	0	0	0	0	0	0	0	5.3824	2.7941	4.0842	2.7793
Negative	1.4724	329.087	1.4724_329.0874	0	0	0	0	0	0	0	0	0	0	0	0	0	0	0	0	0	0	0	0	0	0	0	0	0	0	1.2601	1.4154	0.6255	0.9919	0	0	0	0	0	4.4251	0	7.948	6.8741	2.4706
Negative	0.8403	329.088	0.8403_329.0879	0	0.9387	1.5239	0	0	0	2.3822	1.6553	0	0	0.8042	0	0.9573	0.8812	1.0308	1.1365	0	1.4172	0.5562	2.0517	0.8812	0.6827	0	0	0.996	1.4507	1.2401	1.2617	1.0369	2.4154	0	0	1.766	0	0	0	0	0	0	1.4795
Negative	0.475	329.091	0.475_329.0911	2.7798	0	1.1807	1.1112	1.6101	0	0	0	0	0	0.9126	7.4173	0	0	0	0	0	0	0	0	0	0	0	0	0.6141	0	0	0	0	0	0	0	0	0	0	0	0	0	0	0
Negative	1.3823	329.093	1.3823_329.093	0	0	0	0	0	0	0	0	0	0	0	0	0	0	0	0	0	0	0	0	0	0	0	0	0	0.8448	0.558	1.2041	0	0	0	0	0	0	0	3.8131	2.3986	5.0383	5.4864	2.1086
Negative	2.1419	329.094	2.1419_329.0944	0	0	0	0	0	0	0	0	0	0	0	0	1.6552	3.6479	0.9622	2.8293	1.5852	0	1.8099	0	0	0	0	0	0	0	0	0	0	0	0	0	0	0	0	0	0	0	0	0
Negative	3.4482	329.117	3.4482_329.1171	0	0	0	0	0	0	0	0	0	0	0	0	0	0	0	0	0	0	0	0	0	0	0	0	0	0	0	0	0	0	5.7338	4.5404	3.4795	0	0	3.4268	2.13	3.0347	4.1023	1.8619
Negative	3.2123	329.139	3.2123_329.1392	1.9249	0	2.4583	2.1162	2.0731	0	0	0	0	0	2.976	2.1683	3.4424	3	1.9565	0	0	0	0	0	2.9205	2.8299	4.5781	2.7167	2.6013	0	0	0	0	0	0	3.0447	0	0	0	0	0	0	0	0
Negative	3.5577	329.141	3.5577_329.1406	2.1852	2.2846	4.6757	3.626	2.341	0	0	0	0	0	0	0	2.9299	3.5247	0	0	0	0	0	0	3.6896	2.3854	4.04	3.9746	0	0	0	0	0	0	4.4993	2.8437	0	0	0	0	0	2.0755	0	0
Negative	6.1054	329.231	6.1054_329.2307	0.4063	0	6.3268	6.035	6.9262	53.8986	9.6021	15.8515	31.5408	66.4751	16.9341	6.4921	25.8812	20.3366	5.255	46.5574	40.9094	30.4459	60.7462	42.3475	5.6319	3.9161	5.1178	8.9656	0	3.7163	16.2076	14.7984	12.3632	16.4434	3.9458	4.5573	0	0	0	20.6372	14.2331	65.0501	39.935	46.8021
Negative	0.7209	330.046	0.7209_330.0461	0	0	0	0	0	2.7475	0	3.0823	1.0106	0.1287	0	0	0	0	0	0	0	1.5798	0.2165	0.855	0	0	0	0	0	0.2184	0.3644	0	0.182	0.1476	0	0	0	0	0	0	0.9084	0.2594	0	3.6511
Negative	1.0913	331.065	1.0913_331.0651	14.4098	10.0379	11.8128	9.3584	11.4853	13.6618	11.3609	11.4238	15.8896	13.6706	14.3969	21.3594	20.1138	13.3887	27.4077	24.8383	37.9368	33.0212	22.4209	33.8243	35.7147	28.7001	20.7679	20.2619	31.5572	14.7659	39.2008	34.921	26.5916	21.7043	17.8604	10.4222	12.5397	10.3505	10.8675	11.948	13.3112	18.8379	22.0538	8.3796
Negative	0.861	331.066	0.861_331.0656	0	0	0	0	0.7747	2.0067	0	1.2773	0	2.1367	0	1.1383	0	0	0	3.261	3.2194	2.9561	2.2129	5.0213	1.149	0.9347	0	0	0	1.3154	4.9365	4.2045	3.2817	2.3888	0	0.587	0	0	0	0	0	2.1308	0	1.1427
Negative	0.9663	331.067	0.9663_331.0674	0	0	0	0	0	1.9694	0	0	0	2.9029	0	0	0	0	0	4.3393	8.7983	6.2344	3.1614	5.4239	1.2807	1.1145	0	0	0	1.7922	0	6.6607	0	3.8944	0	0	0	0	0	0	0	4.2639	0	2.0327
Negative	0.7866	331.067	0.7866_331.0674	0	0	0	0	0	1.1628	0	0	1.7272	1.0794	0	0	0	0	0	1.9235	0	0	2.2129	3.0054	0	0.4321	1.7203	0	0	1.0366	2.7267	2.9356	2.5884	0	0	0	0	0	0	0	0	0	0	0.7735
Negative	3.5101	331.083	3.5101_331.0834	0	0	0	0	0	1.2668	0	0	0.9067	0	0	0	0	0	0	1.9161	1.1641	3.7745	1.489	4.3991	0	0	0	0	0	0	0	0	0	0	0	0	0	0	0	0	0.605	0	0.4788	0
Negative	2.5049	331.174	2.5049_331.1741	0.8367	0.6852	0	0.4477	1.26	0	0	0	0	0	1.0077	1.0552	0	0.9435	1.223	0	0	0	0	0	2.4809	1.681	0.7851	2.1785	1.4524	0	0	0	0	0	2.0761	2.7028	3.3246	1.6639	2.0247	0	0	0	0	0
Negative	2.7404	883.283	2.7404_883.2832	0	0	0	0	0	0	2.5443	0	1.9554	2.3539	0	0	0	0	0	0	0	0	0	0.1301	0	0	0	0	0	0	0	0	0.1595	0.7546	0	0	0	0	0	0	0	0	4.0842	2.7793
Negative	2.3723	885.261	2.3723_885.2615	0	0	0	0	0	0	2.6291	2.4469	1.8146	2.1135	0	0	0	0	0	2.8968	2.0949	0	1.9346	1.0492	0	0	0.2871	0	0	0	0	0	0	2.8231	0	0	0	0	0	0.3562	0	0	0	1.563
Negative	3.1912	891.239	3.1912_891.2385	0	0	0	0	0	0	0	0	0	0	0	0	0	0	0	0.2372	0.2572	0	0	0.079	0	0	0	0	0	0	0.2276	0	0	0.144	6.3751	3.7414	3.934	5.0582	0	8.9621	8.3161	6.5461	7.785	4.7123
Negative	1.8414	891.277	1.8414_891.2773	0	0	0.1456	0	0	0	0	0	0	0	0	0	0	0	4.8343	18.4983	2.3322	2.1003	5.3291	1.279	0	0	0.285	0	0	1.4256	1.2509	1.0443	0.9549	0.8463	0	0	0.1994	0	0	0	0	0	0	0
Negative	2.6391	893.179	2.6391_893.1791	2.7245	3.1217	0	0	4.1263	0	0	0	2.2447	2.0018	0	4.1325	0	0	4.231	0	2.3661	2.1028	1.9791	2.6613	0.4333	0	0	0	3.3954	0	0	0	0	0	0	3.4877	3.4663	0	0	4.6446	2.9162	3.0743	1.919	1.8735
Negative	4.853	893.404	4.853_893.4038	0	0	0	0	0	0.3763	0	0	0	0	0	0	0	0	0	0	2.6696	2.9954	3.2082	3.3842	0	0	0	0	0	0	0	0	0	0	0	0	0	0	0	0	0	0	0	0
Negative	4.9664	893.408	4.9664_893.4084	0	0	0	0	0	0	0	0.3737	0	0	0	0	0	0	0	0	2.1697	0	0	2.2061	0.2192	0	0	0	0	0	0	0	0	0	0	0	0	0	0	0	0	0	0	0
Negative	2.6346	895.195	2.6346_895.1951	34.908	40.3414	19.6354	28.6798	38.0008	15.4315	17.8001	14.3846	25.411	19.8732	33.9407	39.508	28.1247	33.8747	35.9571	15.4548	29.6575	25.5304	22.2315	24.5834	23.9888	24.8554	23.8506	16.0753	32.2743	7.0705	12.7861	11.3646	22.9219	8.8772	30.4289	42.791	44.4102	29.5802	43.6472	40.3253	31.5226	25.8383	25.4751	18.8205
Negative	2.3724	895.196	2.3724_895.1958	0	0	0	0	0	4.3992	0	1.3373	3.2025	1.3443	0	0	0	0	0	1.4175	4.8731	2.6916	1.9298	3.596	0	0	0	0	0	0	0	0	2.7858	0	0	0	0	0	0	3.0375	2.79	1.8146	1.826	1.8527
Negative	2.2854	895.197	2.2854_895.1968	0	0	0	0	0	2.3151	1.4814	0	2.7118	1.0707	0	0	0	0	0	1.4886	3.7499	1.3615	1.9298	1.9933	0	0	0	0	0	0	0	0	1.0253	0	0	0	0	0	0	2.5721	2.4381	1.0439	1.1814	0.8686
Negative	2.4614	895.197	2.4614_895.1972	0	0	0	0	0	4.3992	2.5678	1.5408	3.8633	1.7977	0	0	0	0	0	2.0092	6.5875	2.6916	2.6011	5.8419	0	0	0	0	0	0.6821	2.6245	1.9353	4.6227	0.6873	0	0	0	0	0	4.045	4.3978	2.996	2.2633	2.1292
Negative	6.9953	895.246	6.9953_895.2461	0	0	0	0	0	1.5906	1.2449	0.9519	0.9974	0	0.2375	0	0	0	0	0.9125	1.1927	0.8069	1.1443	1.0082	0	0	0	0	0	1.6739	1.446	1.2024	0	0	0	0	0	0	0	0.3825	0.9136	1.8993	1.9395	2.674
Negative	2.6266	897.249	2.6266_897.2488	0	0	0	0	0	0	0	0	0	0	0	0	0	0	0.074	0.5644	0	0.3789	0	0	11.6854	25.6226	8.5335	19.745	18.8648	8.1999	0	3.7105	7.2314	25.0322	0	0	0	0	0	0	7.0102	6.6214	0	19.7573
Negative	3.1192	897.261	3.1192_897.2615	0.3392	0.2703	0	0	0	0	0	0	0	0	0	0	0	0	0	0	0	0	0	0	0	0	0	0	0	10.2601	0	0	0	6.8878	0	0	0	0	0	0.6107	2.4078	0	0	0
Negative	2.7715	899.256	2.7715_899.2559	0	0	0	0	0	0	0	4.5446	0	0	0	2.5132	0.2469	0.4705	0	0	0	2.0866	2.223	1.1389	0	0	0	0	0	0	0	0	0	0	0	0	0	0	0	0	0	0	0	0
Negative	2.7677	899.271	2.7677_899.2708	0	0	0.5863	0.943	0	2.0905	5.165	4.5446	0	2.4805	0	2.5132	0	0	0	0	1.5245	2.0866	2.223	1.1389	0	3.4888	0	0	0	0	0	0	0	2.0248	0	0	0	0	0	0	0	0	0	0
Negative	0.5248	333.031	0.5248_333.0314	1.6125	1.5336	1.3637	1.558	1.4526	0	0	0	0	0	3.0138	0	4.7139	2.1607	1.5547	3.8958	0	0	0	0	7.2228	2.288	8.5132	9.053	2.7947	0	0	0	0	0	4.574	3.5962	2.5384	2.387	3.9724	0	0	0	0	0
Negative	0.6409	333.036	0.6409_333.0364	0	0	0	0	0.3896	0.9556	1.2518	0	1.0731	1.318	0	0	1.0867	0	0.7333	1.9809	1.8198	1.0367	1.4651	0.9538	0	0	2.7013	2.2008	1.2309	1.0299	5.7036	4.9714	3.6397	1.6489	0	0	0	0	1.5483	1.8167	0	0.9888	0.5337	0
Negative	0.618	333.052	0.618_333.0523	0	0	0	0	0	1.31	1.4506	0.9676	1.3578	0	0	0	0	0	0	0	0	0	0	0	0	0	0	0	0	0	5.7036	3.9711	4.2114	0	0	0	0	0	1.5483	0.8213	0	0	0	0
Negative	0.51	333.059	0.51_333.0594	0	1.8308	1.7016	0	0	0	0	0	0	1.5521	1.2256	0	4.7139	0.9122	0.9614	3.8958	0	0	0	0	1.1214	0	1.8775	0	0.5975	0	5.0791	3.5038	4.2114	0	4.574	1.5166	0	1.025	1.8659	0	0.4366	0	0	0
Negative	0.5129	333.09	0.5129_333.09	1.4358	0	0	0.8879	0.339	0.3854	2.2159	2.4451	0.5582	0	0	1.1536	0	0	0.9614	0	0.6006	0.9362	0.5504	0.7324	0	0.4525	0	0	0.5975	0	0	0	0	0.8087	0	0	0.8689	0	0	0.2657	0	0.6532	0.3997	0.4926
Negative	2.3045	335.075	2.3045_335.0755	0	0	0	0	0	0	0	0	0	0	0	0	0	0	0	0	0.3592	0	0	0	0	0	0	0	0	0	1.9884	1.9291	1.1584	0	0	0	0	0	0	0	0	0	0	0
Negative	2.218	335.076	2.218_335.0758	0	0	0	0	0	0	0	0	0	0	0	0	0	0	0	0	0	0	0	0	0	0	0	0	0	0	2.2199	2.6552	0.9732	0	0	0	0	0	0	0	0	0	0	0
Negative	2.4907	335.076	2.4907_335.0764	14.4242	8.8252	2.1399	10.317	18.9525	0	0	0	0	0	15.7139	6.4554	10.4752	4.5959	8.9033	0	0	0	0	0	36.6273	15.6733	31.1639	19.5526	26.3864	0	10.7884	15.0929	4.8124	0	7.2121	16.9222	3.911	3.9963	13.8135	0	0	0	0	0
Negative	2.8262	335.077	2.8262_335.0772	0	0	0	0	0	0	0	0	0	0	0	0	0	0	0	0	0	0	0	0	0	0	0	0	0	0	1.9575	4.0953	1.5011	0	0	0	0	0	0	0	0	0	0	0
Negative	0.8737	335.079	0.8737_335.0786	0	0	0	0	0.5589	0	0	0	0	0	0.5428	0	0	0	0.7765	0	1.1363	1.8801	0.7008	1.3232	0	0.6879	0	1.0369	0	0.5802	0	0	0	0.908	0	0	0	0	0	0	0	1.007	0	0.669
Negative	2.1195	335.08	2.1195_335.0801	0	0	0	0	0	1.5715	3.0228	2.8065	1.5065	2.0528	0	0	0	0	0	4.5851	3.1907	7.556	1.8483	5.9929	0	0	0	0	0	0	2.1827	2.7264	0.7386	0	0	0	0	0	0	0	0	0	0	0
Negative	1.595	335.132	1.595_335.1322	0	0	0	0	0	0.6047	0	0	0	0	0	0	0	0	0	0	0.447	0	0	0	0	0	0	0	0	0.4424	0	0	0	0.7604	0	0	0	0	0	1.9955	0	1.4229	2.8082	1.5764
Negative	1.326	335.136	1.326_335.1361	0	0	0	0	0	0.6528	1.1024	0	0	0	0	0	0	0	0	1.1041	0.911	0	0	0	0	0	0	0	0	1.1562	0	0	0	0.691	0	0	0	0	0	1.5305	2.6165	1.5047	2.0872	0.911
Negative	3.2221	335.141	3.2221_335.141	0	0	0	0	0	1.288	0	0	0.9308	0.7348	0	0	0	0	0	2.7057	2.0333	1.6309	2.1323	0	0	0	0	0	0	0	0	0.3249	0	0	0	0	0	0	0	0	0	0	0	0
Negative	0.6123	337.058	0.6123_337.0576	0	0	0.4971	0.2391	0	1.3656	1.3189	0.9239	2.8111	0	0.492	0	0	0	0	7.2209	0	3.6945	0	2.9912	0.7413	0	0	0.5593	0.8224	1.6821	0	2.5516	2.7751	1.8154	0	0	0	0	0.7534	0.869	2.4721	1.4023	0	0.5693
Negative	0.6485	337.071	0.6485_337.0712	0	0	2.8043	0	0.2448	0	1.4573	1.0951	2.8111	0.6726	0	0	2.5289	0	4.5694	7.2209	3.8708	3.7184	4.0019	5.2322	0	0	0	0	0	3.421	0	4.5922	2.7751	3.2661	0	0	0	0	0	0.7267	0	1.1686	0	0.5152
Negative	1.9018	903.349	1.9018_903.3492	0	0	0	0	0	0.4348	0	0	0.4984	0.1289	0.1554	0	0	0	0	0	0.27	0.3847	0.1453	0.4337	0	0	0	0	0	0.4435	3.1642	2.6468	2.5686	0.2469	0	0	0	0	0	0.4793	0.6649	0.524	0.6565	0.9847
Negative	3.0142	905.313	3.0142_905.3128	0.298	0.2213	0	0.2756	0.2078	2.4136	3.0039	2.9006	2.6316	2.6328	0	0	0	0	0	2.0136	3.9394	1.6213	2.4795	1.0526	0	0	0	0	0	0	0.7312	0.9496	1.2779	0	0	0	0	0	0	5.9462	6.1147	6.643	8.1909	4.843
Negative	2.8918	905.319	2.8918_905.3186	0	0	0	0	0	0.7736	0	2.0573	0	1.8425	0	0	0	0	0	0	0	1.5205	0.9947	1.3623	0	0	0	0	0.1018	0.9465	1.015	1.1288	2.1514	2.7868	0	0	0	0	0	1.2081	1.531	0	2.8445	2.1045
Negative	2.8893	905.333	2.8893_905.3327	0	0	0	0	0	0.7736	0	2.0573	2.0278	1.8425	0	0	0	0	0	1.6906	0	1.5205	0	1.3623	0	0	0	0	0.1018	1.4137	1.015	1.1288	2.1514	2.7868	0	0	0	0	0	0	0	0	2.0682	0
Negative	4.8488	907.378	4.8488_907.3775	0	0	0	0.1337	0	0	0	0.2236	0	0	0	0	0	0	0	0.4956	1.7499	1.8972	1.9389	1.2575	0	0	0	0	0	0	0	0	0	0	0	0	0	0	0	0.2846	0.1177	0	0	0
Negative	4.8292	907.391	4.8292_907.3906	0	0	0	0.1337	0	0	0	0.2236	0	0	0	0	0	0.1469	0	0	1.7499	1.8972	1.9389	1.2575	0.1918	0	0	0	0	0	0	0	0	0.1697	0	0	0	0	0	0	0.1177	0	0	0
Negative	3.2096	909.21	3.2096_909.21	0	0	0	0	0	0	1.0372	0.262	0.4756	0.3191	0	0	0	0	0	0	2.5709	1.1884	0.5567	0	0	2.4652	0	0	0	0.0858	1.4283	1.3324	2.1443	0.2106	0	0	0	0	0	1.8461	1.7314	0.9695	1.6985	0
Negative	2.6196	909.211	2.6196_909.2106	0	0	0	0	0	0.0596	0	0	0.0845	0	0	0	0	0	0	0.5515	0	0.0778	0.6915	0.1351	0	0	0	0	0	0	0.1215	0	0	0	0	0	0	0	0	2.9382	2.3818	1.8363	0	1.5871
Negative	3.0606	909.404	3.0606_909.4036	0	0.0965	0	0	0	0.6258	0.2974	0.2659	0.4971	0.5207	0	0	0	0	0.0733	1.1527	1.5038	2.0256	0.7817	1.4285	0	0	0	0	0	0.3526	0.5375	0.9801	0.6261	0.4919	0	0	0	0	0	1.9321	2.1563	2.3098	4.4804	3.0393
Negative	4.3157	911.393	4.3157_911.393	0	0	0	0	0	0	0	0	0	0	0	0	0	0	0	0	0	2.3077	0	1.8979	0	0	0	0	0	0	0	0	0	0	0	2.7543	0	0	0	0	7.4506	7.6846	2.9078	9.5996
Negative	4.0902	911.393	4.0902_911.3928	0	0	0	0	0	7.8296	3.7199	5.0224	5.1136	4.9899	6.1575	4.885	0	6.8646	9.1297	30.6534	13.9057	19.7333	11.6747	19.1713	4.0255	5.1554	0	3.4848	6.0099	22.1659	19.0997	20.564	22.3327	16.3641	6.0295	6.3971	4.5978	0	4.9532	13.4379	22.9701	16.6318	19.7426	26.9718
Negative	3.977	913.407	3.977_913.4066	0	0	0	0	0	3.254	1.9387	2.0371	0	0	0	0	0	0	0	2.0732	0	0	0	0	0	0	0	0	0	6.4785	5.9796	7.9841	8.0535	6.8393	0	0	0	0	0	0	0	0	0	0
Negative	4.3284	913.408	4.3284_913.4076	0	0	0	0	0	0	0	0	0	0	0	0	0	0	0	0	0	0	0	0	0	0	0	0	0	0	0	0	0	0	0	0	0	0	0	5.7903	10.7695	12.2587	13.033	17.8684
Negative	5.1446	913.433	5.1446_913.4328	0	0	0	0	0	0.6265	0	0	0	0.4745	0	0	0	0	0	0	0.9463	1.8012	1.1325	1.5418	0	0	0	0	0.1296	0	0	0.5091	0.4279	0	0	0	0	0	0	0.1735	0.3173	0.2122	0.2921	0
Negative	4.3246	914.443	4.3246_914.4435	0	0	0.1554	0	0	1.8886	0	0	0	0	0	0	0	0	0	1.5249	1.1481	1.3509	0	2.625	0	0	0	0	0	1.8459	3.4271	13.65	4.8828	4.2481	0	0	0	0	0	1.6321	0	0	6.5977	0
Negative	3.9281	915.423	3.9281_915.4226	0	0	0	0	0	9.5627	0	5.2341	6.5532	0	0	0	0	0	0	0	0	0	0	0	3.8008	6.8157	0	3.4141	4.1413	18.2646	15.2693	19.2476	20.8951	17.4648	0	0	0	0	0	0	0	0	0	0
Negative	0.5281	337.074	0.5281_337.0736	11.8537	10.6781	11.1523	10.5148	11.0751	0	2.1759	2.3374	2.8111	0	13.3031	15.4955	17.8754	11.0428	22.0739	7.2209	3.8708	3.8899	4.0019	3.6189	9.5927	8.1424	8.8364	10.3534	10.0922	1.6821	2.9718	3.7565	3.812	1.4848	5.2147	5.4544	10.547	5.5248	7.7997	0	2.4721	0	0	0.3663
Negative	0.7119	337.081	0.7119_337.0807	0	0	0	0	0	1.6674	1.9443	2.7461	0	1.9687	0	2.9058	0	0	4.5694	4.1445	3.0787	3.7184	2.9937	5.2322	0	4.1574	0	0	0.2156	3.421	4.1929	4.5922	5.0199	3.2661	0	0	0	0	0	0	0	1.8011	2.0183	1.2083
Negative	2.796	337.092	2.796_337.0922	3.4482	5.7667	0	0	5.2881	3.216	0	0	0	1.7849	5.0835	0	5.3566	2.46	2.7488	0	3.0747	0	0	1.3571	8.0707	0	15.0551	3.9964	5.0379	0	0	5.6865	3.6776	0	3.9766	4.3033	2.1153	5.1711	2.4955	0	0	2.4123	0	0
Negative	2.4082	337.092	2.4082_337.0925	2.7897	0	0	2.306	0	0	0	0	0	0	4.4841	0	0	2.3315	0	0	0	0	0	0	0	0	0	0	0	0	0	0	0	0	0	3.9234	0	2.8823	1.9017	0	0	0	0	0
Negative	1.8647	337.097	1.8647_337.0972	6.7737	2.9285	3.0466	6.4362	9.3203	0	0	0	0	0	5.7191	6.5191	5.688	3.4592	7.0966	0	0	0	0	0	8.9454	4.6395	5.807	7.8464	5.4539	0	4.3906	0	0	0	6.1831	5.3079	5.3616	3.3787	7.8291	0	0	0	0	0
Negative	1.8435	337.111	1.8435_337.1106	6.7737	2.9285	0	6.4362	9.3203	0	1.7252	0	2.7449	0	0	6.5191	5.688	0	7.0966	10.2443	5.2864	0	4.2284	0	8.9454	4.6395	0	7.8464	5.4539	2.9514	4.3906	4.9457	3.3032	2.0412	6.1831	5.3079	5.3616	0	7.8291	0	3.0775	1.3202	2.0223	1.5907
Negative	1.5757	337.129	1.5757_337.1286	0	0	0	0	0	0	0	0	0	0	1.4675	0	0	0	0	4.7459	0	2.3276	1.7173	0.8315	0	0	0	0	0	2.2324	0	0	0	0	3.596	0	2.4567	2.6939	0	0	0	0	0	0
Negative	2.6605	337.145	2.6605_337.145	0	0	0	0	0	0.6857	1.21	0	1.1762	1.2402	0	0	0	0	0	2.2417	3.0445	3.3496	3.2326	2.1758	0	0	0	0	0	0	0.9375	0.7646	1.1268	1.2268	0	0	0	0	0	0	1.359	2.0279	3.0691	2.3475
Negative	1.5336	337.145	1.5336_337.1452	0	0	0	0	0	1.7661	0	0	1.5307	1.1446	0	0	0	0	0	0	0	0	0	0	0	0	0	0	0	1.5355	1.2147	1.3581	0.7311	0	3.596	0	0	0	0	2.8707	3.1029	2.4883	3.2291	1.7125
Negative	1.6698	339.072	1.6698_339.0719	0	1.0918	0.5281	1.4587	1.0095	0	0	0	0	0	0.8955	0.4435	1.276	0.7343	0.6845	0.8218	0	0	0	0	6.1229	3.7952	0	3.2489	0	0	3.1887	2.6398	3.8452	0	3.1785	2.9628	2.0059	2.2238	1.8225	0	0	2.2166	2.061	0
Negative	4.8164	339.072	4.8164_339.0722	1.2367	1.4885	0.2486	1.0933	1.5582	0	0	0	0	0	1.328	1.6	1.0451	1.3453	1.5761	0	0	0	0	0	3.228	2.8052	2.2763	2.7518	3.7647	0	0	0	0	0	3.1713	4.4708	4.3248	3.1728	6.0921	0	0	2.0711	2.3593	0
Negative	0.4976	339.079	0.4976_339.0786	2.4567	0	0	1.4973	1.9525	0.3628	0.7664	1.0687	0.3902	0.1865	0	3.6068	0	0.97	2.9594	3.6542	2.0318	2.6728	2.3575	2.1125	2.4691	2.3067	1.6818	3.013	2.7067	2.782	0.6231	1.1106	0.8152	1.4566	0	0	0	0	2.65	0.5716	0	0	0	1.3388
Negative	8.4571	339.198	8.4571_339.1976	0	0	0	1.199	0.8735	0.9302	4.3148	1.6408	0	1.5821	1.7038	0.6557	0	1.5518	0	1.3913	5.5604	0	1.4573	0	1.4985	0	0	0	0	0.7765	7.5211	2.3626	0	2.2405	0.8458	0.9178	1.1191	0	2.1434	1.811	0	3.4859	2.0494	1.6819
Negative	8.2522	339.199	8.2522_339.199	0	0	0	0	0	0	4.9353	0	0	0	0	0	0	0	0	0	6.2653	0	0	0	0	0	0	0	0	0	0	0	0	0	0.6216	0	0	0	0	0	0	0	0	0
Negative	8.1627	339.2	8.1627_339.1996	0	0	0	0	0	0	4.818	0	0	0	0	0	0	0	0.4898	0	3.5404	2.2382	0	0	0	0	0	0	0	0	0	0	0	0	0	0	0	0	0	0	5.4814	0	0	0
Negative	7.4297	339.215	7.4297_339.2154	0	0	0	0	0	0	0	0	0	4.1189	0	0	0	0	0	0	0	0	30.9256	7.0578	0	0	0	0	0	0	0	0	0	0	0	0	0	0	0	0	0	0	0	0
Negative	4.4183	915.423	4.4183_915.4232	7.0104	7.2954	0	5.0232	6.2429	11.3448	5.0792	5.2954	11.4245	12.2297	7.6126	3.7166	5.2577	3.9487	7.8698	10.8615	12.5193	22.3336	7.5406	23.002	0	0	0	0	0	0	0	0	0	0	9.2925	12.5807	10.1688	11.0637	11.9186	15.2395	25.8381	30.8548	36.572	41.461
Negative	4.0225	915.425	4.0225_915.4251	0	0	0	0	0	0	0	0	0	0	0	0	0	0	0	0	0	0	0	0	1.8165	3.6154	2.2017	3.2798	1.4521	0	0	0	0	0	8.6685	6.0946	5.8105	3.3258	4.3897	0	0	0	0	0
Negative	4.9334	915.444	4.9334_915.4442	0	0	0	0	0	0	0	0	0	0	0	0	0	0	0	2.7656	0	0	1.8276	0	0	0	0	0	0	0	0	0	0	0	0	0	0	0	0	0	0	0	0	0
Negative	2.3152	917.239	2.3152_917.2385	3.8747	3.7861	1.3168	3.2429	4.9475	0	0	0	0	0	0.579	0	0	0.257	0.6053	0	0	0	0	0.2277	0	0	0	0	0	0.13	0	0	0	0	0	0	0	0	0	0	0	0	0	0
Negative	3.2775	917.365	3.2775_917.3645	0	0	0	0	0	0.5976	0	1.135	0.684	0.3862	0	0	0	0.7602	0	4.98	2.6543	4.1479	1.7456	2.5769	0	0	0	0	0	0	0	0	0	0	0	0	0	0	0	0.22	0	0.5426	0	1.3593
Negative	2.7564	917.37	2.7564_917.3698	0.1693	0	0	0	0	1.0299	4.8984	4.2254	0.8953	0	0	0	0	0	0	0	0	0	0	0	0	0	0	0	0	1.2769	0	0	0	1.1673	0	0	0	0	0	0	0.5076	0.4775	0	0
Negative	3.1378	919.327	3.1378_919.3267	0	0	0	0	0	0	0	0	0	0	0	0	0	0	0.1767	0	0	0	0	0	0	0	0	0	0	0	0	0.3265	0	0	0	0	0	0	0	7.0427	8.1625	7.4427	11.4023	7.4468
Negative	3.1451	921.306	3.1451_921.3061	0	0	0	0	0	0.3333	1.0401	0.3033	0.4091	0.3961	0	0	0	0	0	1.0235	2.0807	1.2224	0.5743	1.3597	0	0	0	0	0	0.4416	2.9104	2.3957	3.8332	1.2401	0	0	0	0	0	2.2969	2.6751	1.9663	1.8097	1.0028
Negative	3.2284	923.224	3.2284_923.2243	0	0	0	0	2.7384	0	0	0	0	0	0	3.6701	0	0	0	1.638	2.8035	0	1.894	0	0	0	0	0	0	0	0	0	0	0.2153	0	0	0	0	0	0	0	0	2.1727	0
Negative	2.7725	923.226	2.7725_923.2263	0	0	0	0	0	0	0	0	0	0	2.3255	0	2.8336	1.4773	2.0091	2.1923	4.4674	0	2.3873	0	0	0	0	0	0	0	0	0	0	0	17.4818	17.5305	18.6481	10.2998	7.5558	20.2134	17.9368	12.8291	5.957	5.9838
Negative	2.1402	927.18	2.1402_927.1799	0	0	0	0	0	0	0.519	0	0.0668	0	0	0.1822	0	0	0	0	0.1998	0	0	0	0	0	0	0	0	0	1.1576	2.0301	2.5461	0.124	0	0	0	0	0	0.2147	0.4546	0	0.1463	0.0495
Negative	4.0754	927.388	4.0754_927.3883	0	0	0	0	0	1.2823	1.0563	1.3944	1.2066	1.2515	0	0	0	0	0	3.2864	2.5346	3.1261	1.7236	3.4594	0	0	0	0	0	1.0338	0	0.758	0.735	1.412	0	0	0	0	0	0	1.5911	0	0	2.6058
Negative	4.3072	927.39	4.3072_927.3902	0	0	0	0	0	0	0	0	0	0	0	0	0	0	0	0	0	0	0	0	0	0	0	0	0	0	0	0	0	0	0	0	0	0	0	0	0	1.5488	1.9272	2.3002
Negative	4.8321	928.462	4.8321_928.4619	0	0	0	0.082	0.0992	0.7699	0	0.1856	0.1169	0.1252	0	0	0	0	0	0	0.2111	0.1879	0.2471	0	0	0	0	0	0.0629	0	1.3577	5.3508	1.3115	1.5874	0	0	0	0	0	0.3634	0.1684	0	0.1383	0
Negative	2.67	929.282	2.67_929.2815	0	0	0	0	0	1.0321	2.492	2.6711	0.7883	1.8867	0	0	0	0	0	0	0	0	0	0	0	0	0	0	0	0.8049	0.1861	0	0	0.4371	0	0	0	0	0	0	0.2322	0.0859	0.0701	0
Negative	2.2983	933.232	2.2983_933.2325	0	0	0	0	0	0	0	0	0	0	0	0	0	0	0	0	0	0	0	0	0	0	0	0	0	0.2553	4.1049	4.3446	4.902	0.3319	0	0	0	0	0	0.385	0.3749	0.6231	0.4055	0.3471
Negative	3.0767	341.072	3.0767_341.0715	2.827	0	2.4417	2.9642	0	0	0	0	0	0	0	0	0	1.9359	0	0	0	0	0	0	1.3815	0	0	0	0	0	0	0	0	0	4.2818	4.0548	4.392	5.1596	3.6621	0	0	0	0	0
Negative	3.2509	341.073	3.2509_341.0734	2.5034	0	2.2632	3.267	3.0035	0	0	0	0	0	2.0667	2.7778	2.2893	2.4752	2.6668	0	0	0	0	0	0	0	1.8008	1.3696	0	0	0	0	0	0	3.1507	0	0	0	2.3437	0	0	0	0	0
Negative	1.7497	341.088	1.7497_341.0879	2.7275	0	4.6155	0	3.5444	0	1.4264	0	0	0	3.6577	0	0	0	0	0	0	0	0	0	0	0	0	0	0	0	0	0	0	0	0	0	0	0	0	0	0	0	0	0
Negative	1.8994	341.089	1.8994_341.089	3.8617	0	5.2174	0	5.4439	0	0	0	0	0	3.3183	2.3705	0	0	0	0	0	0	0	0	0	0	0	4.612	0	0	0	0	0	0	0	0	0	0	0	0	0	0	0	0
Negative	1.6263	341.091	1.6263_341.0913	0	0	0	0	0	0	0	0	0	0	5.7657	2.7431	4.8432	0	0	0	0	1.8139	0	0	21.0317	3.5341	18.6977	0	10.137	1.559	7.924	7.5843	0	0	0	0	0	0	0	0	1.1531	0	0	0
Negative	1.4315	341.098	1.4315_341.0982	6.2264	0	9.7511	0	5.1484	3.2212	5.1079	5.4761	4.1345	3.505	5.0581	0	4.9199	5.2858	0.2902	0	4.0806	3.819	0	0	0	0	0	0	0	1.9773	0	2.8859	0	1.7752	0	0	2.901	0	0	4.1668	2.9226	6.3385	4.3376	3.4518
Negative	0.5026	341.102	0.5026_341.1023	82.4337	126.22	143.753	111.824	99.4777	57.1459	89.4358	88.2874	62.1701	59.492	119.748	96.2505	136.347	143.009	96.5853	53.5684	63.4308	63.0334	48.5643	63.4701	137.439	104.709	137.986	132.769	130.211	67.6378	35.8958	43.2351	40.7501	45.0112	120.91	123.631	168.206	153.331	180.352	62.7939	58.2944	77.9049	0	159.83
Negative	1.1708	341.104	1.1708_341.1041	0	0	0	0	0	0.5595	0	0	0	0	1.6799	0	2.4162	0	0	0	0.8897	0	0	1.3055	0	2.4094	0	0	1.2255	0	0.8255	0	0	0	3.0149	0	0	3.1521	0	0	2.128	3.0013	2.4075	0
Negative	1.9387	341.105	1.9387_341.1053	0	0	0	0	0	0	0.8176	0	2.0079	0	0	0	0	0	0	1.3547	0	0	0	1.4102	0	0	0	0	0	0	0	0	0	0	0	0	0	0	0	0	0	0	0	0
Negative	0.6204	341.106	0.6204_341.1059	0	0	0	0	0	0	0	26.9752	0	0	10.0848	0	0	11.5199	6.7788	0	12.2385	0	11.704	19.222	0	0	0	0	0	0	12.2922	0	3.6278	0	0	0	7.1678	0	0	0	0	0	0	8.9196
[truncated: 6,141 more rows]

## Sheet: Table S4
Table S4: List of metabolites identified in leaf tissues of 3-month-old wheat plants by UPLC-qTOF-MS analysis.
[truncated: 9 more rows]
